# Supplementary material
Source: Research Square preprint supplement (doi:10.21203/rs.3.rs-9711662/v1)
Supplement: Supplementary file 1 [file 87f2256a0de916e79093616f.xlsx]

## Sheet: Sheet1
Sample ID	ITS DNA Sequence	Genbank Accession Number	Common Name(s)	Kingdom	Phylum	Class	Order	Family	Genus	Species
Calima1			Sapodilla	Plantae	Tracheophyta	Magnoliopsida	Malvales	Malvaceae	Matisia	Matisia calimana
Calima2	GATACTTGGTGTGAATTGCAGAATCCCGTGAACCATCGAGTCTTTGAACGCAAGTTGCGCCCGAAGCCATTAGGCCGAGGGCACGTCTGCCTGGGCGTCACGCATCGCGTCGCCCCCCGAACGCCGCAAGGCGTCGTGGGGCGGATACTGGCCTCCCGTGCGCCTCGAGCTCGTGGCTGGCCTAAATGCGAGTCCACGTCGACGGACGTCGCGGCAAGTGGTGGTTGAAACTCAACTCTCTTTGTGTCGCGGCTACAGCCCGTCGCGCGTCCGGACTCCAGACCCTCTAAGCGCTTAGGCGCTCCGACCGCGACCCCAGGTCAGGCGGGATTACCCGCTGAGTTTAAGCATATCACTAAGCGGA	PZ387672	American Black Nightshade, Glossy Nightshade	Plantae	Tracheophyta	Magnoliopsida	Solanales	Solanaceae	Solanum	Solanum americanum
Calima3			False Nettle, Bog Hemp	Plantae	Tracheophyta	Magnoliopsida	Rosales	Urticaceae	Boehmeria	Boehmeria cylindrica
Calima4	GAATCCCCTTGCCCTTGGGCACCCCGCATGAGCATTGGCGGGGATATACGCTCGGGCGCAGAATATGGTCTCCCGTGGGATCGGCATGCACGGCATGTCGAGGTGCGGTTGGCCGAAAATCGAGCATGGCGGTGACGGGCACCACGGCGTTCGGTGGATCGAATGAGATTGGCTGCGTCGTGGGCTCGGCATGCGGCGGGCTCCGGACTTTGAATATCCCCGAGTGCGATCCCAGGTCAGGCGGGGCTACCCGCTGAGTTTAAGCATATCA	PZ387673	Smooth Johnnyberry, sweetbutchberry and Granadillo	Plantae	Tracheophyta	Magnoliopsida	Myrtales	Melastomataceae	Miconia	Miconia laevigata
Calima5			Sanicle or Black Snakeroot	Plantae	Tracheophyta	Magnoliopsida	Apiales	Apiaceae	Sanicula	Sanicula liberta
Calima6			Yellow Plume Justicia,Golden-haired Water Willow	Plantae	Tracheophyta	Magnoliopsida	Lamiales	Acanthaceae	Justicia	Justicia chrysocoma
Calima7	GCGATACTTGGTGTGAATTGCAGAATCCCGTGAACCATCGAGTCTTTGAACGCAAGTTGCGCCCGAAGCCATTAGGCCGAGGGCACGTCTGCCTGGGTGTCACGCACCGTTGCCCCAAAACCCTGTCGTCCCTCCGGTCGATCGGAGCCGGCGAGGTGCTTGGGCGGAAGCTGGCCTCCCGTGAGCACTGCCTCGCGGATGGCCGAAATTAGAGCCTGTGGGGGGCAACCGCCACGTTCCACGGTGGTTGAGCAGACGCCTCGAGGCCCGACCGTGCGCGAGTTGTCCCCGCGGCAAGGCTGCGAGACCCTTGCGAGCAAGTAAGTGCTCCCAACGCGACCCCAGGTCAGGCGGGGCCACCCGCTGAGTTTAAGCATATCACTAAGCGG	PZ387674	Empress Candle Plant, Candle Bush, Ringworm Cassia	Plantae	Tracheophyta	Magnoliopsida	Fabales	Fabaceae	Senna	Senna alata
Calima8	CTTGGTGTGAATTGCAGAATCCCGTGAACCATCGAGTCTTTGAACGCAAGTTGCGCCCAAGGCCTTTCGGTCGAGGGCACATCTGCTTGGGCGTTAAACAACTCGTCGCCCCCCCACCCTCTCTCCCCACACTCCGACCAAGGAGAGCTCGGCGGAGACGAGGGTATGGTGGGCGGAGTCTGGTCGTCCGTGTGCCTGCAGCGCACGCGGTTGGCTGAAAAGCTAGGGCCATGGGCTGTGTGCGGCTCAACAAGTGGTGGTTGTGCGCCCTAAAGGCCGCGATTGTCAGCATGTTGCGCCCATCACTTCTCTCGATTGCCCTGCAAGGACCCAACACAATCGAAACATCCAATCCACGGATCGATTCGAATTGCAACCCCAAGTCAGGTGGGACTACCC…	PZ387675	Jaborandi, Pariparoba, and Gaudichaud's Pepper	Plantae	Tracheophyta	Magnoliopsida	Piperales	Piperaceae	Piper	Piper gaudichaudianum
Calima9			Malanga, Otoy, Cocoyam, or Elephant Ear	Plantae	Tracheophyta	Liliopsida	Alismatales	Araceae	Xanthosoma	Xanthosoma daguense
Calima10			Johnnyberry or Velvet tree	Plantae	Tracheophyta	Magnoliopsida	Myrtales	Melastomataceae	Miconia	Miconia brigittei
Calima11	TACTTGGTGTGAATTGCAGAATCCCGTGAACCATCGAGTCTTTGAACGCAAGTTGCGCCCGAAGCCATTAGGTCGAGGGCACGTCTGCCTGGGCGTCACGCACCGTTGCCCCCCCTCCCTGACGCCCCTCCCGGCATGCTGAGCAAAAAGCTCTGGTTTGGGGGGCCTGGGCTCCCCTCCCGTGGGCTTTGTCCAGGGGCTGGCCTAAAGCCTGATCCTTGCTACCGCTTGTCGTGGCATTGGGTGGTCTTCCATCTAATCGGTACCCCGTCACCAAGTTTTGCCNACCAGGATACTCAACCACCCCTGCTATCCAATAACTCGGACCATGCTCTCCCCACGACCCCAGGTCCCGCGGGGTTACCCGCTGAgTTTAAgCATATCACTAAGCGG	PZ387676	Chichicastle, palo de agua, hincha huevos	Plantae	Tracheophyta	Magnoliopsida	Rosales	Urticaceae	Myriocarpa	Myriocarpa cordifolia
Calima12			Pos or tusilla	Plantae	Tracheophyta	Magnoliopsida	Alismatales	Araceae	Rhodospatha	Rhodospatha oblongata
Sonso1	CGATACTTGGTGTGAATTGGCAGAATCCCGTGAACCATCGAGTCTTTGAACGCAAGTTGCGCCCCAAGCCGTTAGGCCGAGGGCACGTCTGCCTGGGTGTCACGCATCGTTGCCCCCATCCATCCCCTACCCGCTCGGGATCGGTTGTGGTGAGGGCGGACAGTGGCCTCCCGTGCGCACACCGCTCGCGGTTGGCCTAAAATCGAGTCATCGGCGACAACGGCGCCTCGACGATCGGTGGTAATGCTTCGAGCTGCCTCGTTCCCAGTCGTGCGCTCCCGTCGATCCGGACTCAACGACCCTTTCGGCGCCGCAAGCACGGTGCTCGCTTCGCGACCCCAGGTCAGGCGGGATTACCCGCTGAGTTTAAGCATATCACTAAGCGG	PZ387677	Cadillo, Escoba	Plantae	Tracheophyta	Magnoliopsida	Malvales	Malvaceae	Urena	Urena lobata
Sonso2			Moquillo	Plantae	Tracheophyta	Magnoliopsida	Ericales	Actinidiaceae	Saurauia	Saurauia ursina
Sonso3			Sticky Nightshade, Litchi Tomato	Plantae	Tracheophyta	Magnoliopsida	Solanales	Solanaceae	Solanum	Solanum sisymbriifolium
Sonso4			Escoba (Broom)	Plantae	Tracheophyta	Magnoliopsida	Malvales	Malvaceae	Sida	Sida rhombifolia
Sonso5			Chan, Bushmint	Plantae	Tracheophyta	Magnoliopsida	Lamiales	Lamiaceae	Mesosphaerum	Mesosphaerum suaveolens
Sonso6	CGATACTTGGTGTGAATTGCAGAATCCCGTGAACCATCGAGTTTTTGAACGCAAGTTGCGCCCGAAGCCTTTGGTTGAGGGCACGTCTGCCTGGGCGTCACGCATCATGTCGCCCCCGCCAACCATCCCTACCCGGGATGCGTTATGTGTTGGGGCGGAGACTGGTCTCCTGTGCCCATGCGTGCGGTTGGCCTAAATAGTAGTCTCCTTAAGAGAGACGCACGACTTGTGGTGGTTGATAACACAGTCGTCTCGTGTCGTGCGTTTTGAATCTTGAGTTGTTGCTCTAAAGTACCCTCGTGCGTTGTCGTGTTACGATGCTTCGATCGCGACCCCAGGTCAGGCGGGACTACCCGCTGAGTTTAAGCATATCACTAAGCGGA	PZ387678	Cowpen Daisy, Botón de oro	Plantae	Tracheophyta	Magnoliopsida	Asterales	Asteraceae	Sclerocarpus	Sclerocarpus divaricatus
Sonso7	GAATGCGATACTTGGTGTGAATTGCAGAATCCCGTGAACCATCGAGTCTTTGAACGCAAGTTGCGCCCGAAGCCATTTGGCCGAGGGCACGTCTGCCTGGGCGTCACGCATCGCGTCGCCCCCTCGCACGCCGCAAGGCTTTAGCGCGGGGGCGGAAGCTGGCCTCCCGTGCGCCCCGAGCGCGCGGCCGGCCTAAATGCGAGTCCACGTCGACGGACGTCGCGGCAAGTGGTGGTTGAAACTCAACTCTCTCTTGTTGTCGCGGCTACAGCCCGTCGCGCGTCCGGACTCCCCGACCCTCACCGCGCCTCACCAGGCGCTCCGACCGCGACCCCAGGTCAGGCGGGATTACCCGCTGAGTTTAAGCATATCACTAAGCGGA	PZ387679	Wild Tomato	Plantae	Tracheophyta	Magnoliopsida	Solanales	Solanaceae	Solanum	Solanum lycopersicum var. cerasiforme
Sonso8			Mushroom Ginger	Plantae	Tracheophyta	Liliopsida	Zingiberales	Zingiberaceae	Renealmia	Renealmia alpinia
Sonso9	GCGATACTTGGTGTGAATTGCAGAATCCCGTGAACCATCGAGTCTTTGAAcGCAAGTTGCGCCCGAAGCCATTAGGCCGAGGGCACGTCTGCCTGGGCGTCACGCATCGCGTCGCCCCCCTCTCCCCGCACCGCGGGGGGTGGCGGAGAGTATACTGCCCTCCCATGTGCCCTCGCTTCTGGGCTGGCCTAAATGCAACCCCCCGTGACGGGATGTCAGGGGAAGGGGGGGTTGAACCTCACCTCTCGGGGGGCCGGGGCCAAACCCGTCGCCCGGGTCGGCTGCTAAACCCTTCCGCCGTTTAGGCCCCCCAACCGCGACCCCAGGCCAGGCGGAATTACCCgcTGAG	PZ387680	Wild Groundcherry	Plantae	Tracheophyta	Magnoliopsida	Solanales	Solanaceae	Physalis	Physalis angulata
Sonso10	AATGCGATACTTGGTGTGAATTGCAGAATCCCGTGAACCATCGAGTTTTTGAACGCAAGTTGCGCCCGAAGCCATCCGGTTGAGGGCACGTCTGCCTGGGCGTCACGCATCACGTCGCCCCCACCATACATTCCTTTTTAGGACGTCTTTGGTTGGGGCGGAGATTGGTCTCCCGTGCCTATGATGGTGTGGTTGGCCTAAATAGGAGTCTCATCAAGAGGGACGCACGACTAGTGGTGGTTGATAACACAGTCGTCTCGTGTTGTGCGTTTTCATTCTATGATGTAGATGCTATTAAAGTACCCTGACGCATTGTCTTGCGATGATGCTTCGATCGCGACCCCAGGTCAGGCGGGACTACCCGCTGAGTTTAAGCATATCACTAAGCGGA	PZ387681	Altamisa, Ragweed	Plantae	Tracheophyta	Magnoliopsida	Asterales	Asteraceae	Ambrosia	Ambrosia peruviana
Sonso11			Sticky Nightshade, Litchi Tomato	Plantae	Tracheophyta	Magnoliopsida	Solanales	Solanaceae	Solanum	Solanum sisymbriifolium
Sonso12	TTAGGcCgagGGCACGTCTGCCTGGGCGTCaCGCATCGCGTCGCCCCCAACCAATCTTGNTGGATGTGGAATTTGGTCTCCCGTGCCTAANGNGTTGTTGGTCGAAaTGTAGAGTCCGG	PZ387682	Indian Heliotrope	Plantae	Tracheophyta	Magnoliopsida	Boraginales	Heliotropiaceae	Heliotropium	Heliotropium indicum
AP1A	AACGTAGCGAATGCGATACTTGGTGTGAATTGCAGAATCCCGTGAATCATCGAGTCTTTGAACGCAAGTTGCGCCCAAAGCCTTCGGGCCGAGGGCACGTCTGCCTGGGCGTCATAATTCGTCACCCTCCGCACGTCCATCGGGCTGCGTGGGGGTGGAAGTTGGCCTCCCGTTCCCTTGGGTGCGGTTGGCTGAAATATGTAAGGCGCTGGCACATTCTGCCGCAGCATTGGTGGTTCAACTTGTCCCTCCTTGCATGCTGCGCATTGAATTGCTTGATTGCCTATCCCACCCTCTCTTCCACATGTGGAAGATGCTTGATGGTGACCCCAGGTCAGGCGGGATTACCCGCTGA	PZ387683	Useful Marathrum, riverweed	Plantae	Tracheophyta	Magnoliopsida	Saxifragales	Podostemaceae	Marathrum	Marathrum utile
AP1B	AACGTAGCGAATGCGATACTTGGTGTGAATTGCAGAATCCCGTGAATCATCGAGTCTTTGAACGCAAGTTGCGCCCAAAGCCTTCGGGCCGAGGGCACGTCTGCCTGGGCGTCATAATTCGTCACCCTCCGCACGTCCATCGGGCTGCGTGGGGGTGGAAGTTGGCCTCCCGTTCCCTTGGGTGCGGTTGGCTGAAATATGTAAGGCGCTGGCACATTCTGCCGCAGCATTGGTGGTTCAACTTGTCCCTCCTTGCATGCTGCGCATTGAATTGCTTGATTGCCTATCCCACCCTCTCTTCCACATGTGGAAGATGCTTGATGGTGACCCCAGGTCAGGCGGGATTACCCGCTGA	PZ387683	Useful Marathrum, riverweed	Plantae	Tracheophyta	Magnoliopsida	Saxifragales	Podostemaceae	Marathrum	Marathrum utile
AP2A	AACGTAGCGAATGCGATACTTGGTGTGAATTGCAGAATCCCGTGAATCATCGAGTCTTTGAACGCAAGTTGCGCCCAAAGCCTTCGGGCCGAGGGCACGTCTGCCTGGGCGTCATAATTCGTCACCCTCCGCACGTCCATCGGGCTGCGTGGGGGTGGAAGTTGGCCTCCCGTTCCCTTGGGTGCGGTTGGCTGAAATATGTAAGGCGCTGGCACATTCTGCCGCAGCATTGGTGGTTCAACTTGTCCCTCCTTGCATGCTGCGCATTGAATTGCTTGATTGCCTATCCCACCCTCTCTTCCACATGTGGAAGATGCTTGATGGTGACCCCAGGTCAGGCGGGATTACCCGCTGA	PZ387683	Useful Marathrum, riverweed	Plantae	Tracheophyta	Magnoliopsida	Saxifragales	Podostemaceae	Marathrum	Marathrum utile
AP2B	AACGTAGCGAATGCGATACTTGGTGTGAATTGCAGAATCCCGTGAATCATCGAGTCTTTGAACGCAAGTTGCGCCCAAAGCCTTCGGGCCGAGGGCACGTCTGCCTGGGCGTCATAATTCGTCACCCTCCGCACGTCCATCGGGCTGCGTGGGGGTGGAAGTTGGCCTCCCGTTCCCTTGGGTGCGGTTGGCTGAAATATGTAAGGCGCTGGCACATTCTGCCGCAGCATTGGTGGTTCAACTTGTCCCTCCTTGCATGCTGCGCATTGAATTGCTTGATTGCCTATCCCACCCTCTCTTCCACATGTGGAAGATGCTTGATGGTGACCCCAGGTCAGGCGGGATTACCCGCTGA	PZ387683	Useful Marathrum, riverweed	Plantae	Tracheophyta	Magnoliopsida	Saxifragales	Podostemaceae	Marathrum	Marathrum utile
AG			Black Mangrove, Black-tree, Honey mangrove, or Saltbush	Plantae	Tracheophyta	Magnoliopsida	Lamiales	Acanthaceae	Avicennia	Avicennia germinans
RM			Red mangrove, American mangrove or mangle rojo	Plantae	Tracheophyta	Magnoliopsida	Malpighiales	Rhizophoraceae	Rhizophora	Rhizophora mangle
