# Supplementary material
Source: Research Square preprint supplement (doi:10.21203/rs.3.rs-9711662/v1)
Supplement: Supplementary file 2 [file d8c392981f46c1707d298bbf.xlsx]

## Sheet: Sheet1
Sample ID	Sampling Location	Plant source	Tissue	Isolation Medium	16S or ITS Sequence	Genbank Accession Number	% Pairwise Identity with Best Match	Sequence Length	Species Name	Kingdom	Phylum	Class	Order	Family	Genus	Species	Antagonistic to F. oxysporum F1NA	Antagonistic to F. oxysporum F1AN	Antagonistic to F. oxysporum F1UV	Antagonistic to F. oxysporum F1JA	Antagonistic to E. coli	Antagonistic to S. bongori	Antagonistic to S. aureus	Antagonistic to L. monocytogenes
AP1.01A	11°03'03.8"N 73°55'17.6"W; Buritaca River, Sierra Nevada de Santa Marta, Colombia	Marathrum utile - AP1A	Thallus	TSA	CGGAttACTGGGCGTAAgCGCACGCAGGCGGTCTGTCAAGTCGGATGTGAAATCCCCGGGCTCAACCTGGGAACTGCATTCGAAACTGGCAGGCTAGAGTCTTGTAGAGGGGGGTAGAATTCCAGGTGTAGCGGTGAAATGCGTAGAGATCTGGAGGAATACCGGTGGCGAAGGCGGCCCCCTGGACAAAGACTGACGCTCAGGTGCGAAAGCGTGGGGAGCAAACAGGATTAGATACCCTGGTAGTCCACGCTGTAAACGATGTCGATTTGGAGGTTGTGCCCTTGAGGCGTGGCTTCCGGAGCTAACGCGTTAAATCGACCGCCTGGGGAGTACGGCCGCAAGGTTAAAACTCAAATGAATTGACGGGGGCCCGCACAAGCGGTGGAGCATGTGGTT…	PZ394752	99.6	831	Klebsiella variicola	k__Bacteria	p__Proteobacteria	c__Gammaproteobacteria	o__Enterobacterales	f__Enterobacteriaceae	g__Klebsiella	s__variicola	Not tested	Not tested	Not tested	Not tested	Not tested	0	0	0
AP1.01B	11°03'03.8"N 73°55'17.6"W; Buritaca River, Sierra Nevada de Santa Marta, Colombia	Marathrum utile - AP1B	Thallus	TSA	TCGGATTACTGGGCGTaagCGCACGCAGGCtGGTTgattAAGTCATGATGTGAAATCCCCGAGCTTAACTTGGGAACTGCATTTGAAACTGGTCAGCTAGAGTCTTGTAGAGGGGGGTAGAATTCCAGGTGTAGCGGTGAAATGCGTAGAGATCTGGAGGAATACCGGTGGCGAAGGCGGCCCCCTGGACAAAGACTGACGCTCAGGTGCGAAAGCGTGGGGAGCAAACAGGATTAGATACCCTGGTAGTCCACGCTGTAAACGATGTCGACTTGGAGGTTGTGCCCTTGAGGCGTGGCTTCCGGAGCTAACGCGTTAAGTCGACCGCCTGGGGAGTACGGCCGCAAGGTTAAAACTCAAATGAATTGACGGGGGCCCGCACAAGCGGTGGAGCATGTG…	PZ394753	99.2	746	Obesumbacterium proteus	k__Bacteria	p__Proteobacteria	c__Gammaproteobacteria	o__Enterobacterales	f__Hafniaceae	g__Obesumbacterium	s__proteus	Not tested	Not tested	Not tested	Not tested	Not tested	0	0	0
AP1.02A	11°03'03.8"N 73°55'17.6"W; Buritaca River, Sierra Nevada de Santa Marta, Colombia	Marathrum utile - AP1A	Thallus	TSA	TTACTGGGCGTAAgCGCACGCAGGCGGTCTGTCAAGTCGGAtGTGAAATCCCCGGGCTCAACCTGGGAACTGCATCCGAAACTGGCAGGCTAGAGTCTTGTAGAGGGGGGTAGAATTCCAGGTGTAGCGGTGAAATGCGTAGAGATCTGGAGGAATACCGGTGGCGAAGGCGGCCCCCTGGACAAAGACTGACGCTCAGGTGCGAAAGCGTGGGGAGCAAACAGGATTAGATACCCTGGTAGTCCACGCCGTAAACGATGTCGACTTGGAGGTTGTGCCCTTGAGGCGTGGCTTCCGGAGCTAACGCGTTAAGTCGACCGCCTGGGGAGTACGGCCGCAAGGTTAAAACTCAAATGAATTGACGGGGGCCCGCACAAGCGGTGGAGCATGTGGTTTAAT…	PZ394754	99.4	639	Klebsiella aerogenes	k__Bacteria	p__Proteobacteria	c__Gammaproteobacteria	o__Enterobacterales	f__Enterobacteriaceae	g__Klebsiella	s__aerogenes	Not tested	Not tested	Not tested	Not tested	Not tested	0	0	0
AP1.02B	11°03'03.8"N 73°55'17.6"W; Buritaca River, Sierra Nevada de Santa Marta, Colombia	Marathrum utile - AP1B	Thallus	TSA	CGTAaAGCGCaCGCagGCggtcgtTtaaGTCTGATGTGAAATCCCCGAGCtCaCCTGGGAACTGCATTTGAAACTGgtgGCTGAGTCTTGTaGAGGGGGGTAGAATTCCCGGTGTAGCGGTGAAATGctAAAAGATCtGAAGAAATACCGGTGGCAAAGGCAGTCTCCTGGACGAAAACtGaCGCTCAGGTCCAAAACCGTGGGGAGCAAACGGGATTAaAAACCCGGGTAGTCCACCCGGAAAACAAGGTCGACATGTAGGTTGTGCCCTTAAACCCAGgcTTTCCGGAgTTAACGCGTTAAgTCGACCgCCTGGGGAGTACgGTCGCAAgtgTTAAAACTCAAATGAATTGACGGGGGCCCGCACAAGC	PZ394755	88.2	371	Pantoea phytostimulans	k__Bacteria	p__Proteobacteria	c__Gammaproteobacteria	o__Enterobacterales	f__Enterobacteriaceae	g__Pantoea	s__ phytostimulans	Not tested	Not tested	Not tested	Not tested	Not tested	0	0	0
AP1.03A	11°03'03.8"N 73°55'17.6"W; Buritaca River, Sierra Nevada de Santa Marta, Colombia	Marathrum utile - AP1A	Thallus	TSA	TCGgAtTACTGGGCGTaagCGCACGCAGGCGGTCTGTCAAGTCGGATGTGAAATCCCCGGGCTCAACCTGGGAACTGCATCCGAAACTGGCAGGCTAGAGTCTTGTAGAGGGGGGTAGAATTCCAGGTGTAGCGGTGAAATGCGTAGAGATCTGGAGGAATACCGGTGGCGAAGGCGGCCCCCTGGACAAAGACTGACGCTCAGGTGCGAAAGCGTGGGGAGCAAACAGGATTAGATACCCTGGTAGTCCACGCCGTAAACGATGTCGACTTGGAGGTTGTGCCCTTGAGGCGTGGCTTCCGGAGCTAACGCGTTAAGTCGACCGCCTGGGGAGTACGGCCGCAAGGTTAAAACTCAAATGAATTGACGGGGGCCCGCACAAGCGGTGGAGCATGTGGT…	PZ394756	99.6	753	Klebsiella aerogenes	k__Bacteria	p__Proteobacteria	c__Gammaproteobacteria	o__Enterobacterales	f__Enterobacteriaceae	g__Klebsiella	s__aerogenes	Not tested	Not tested	Not tested	Not tested	Not tested	0	0	0
AP1.03B	11°03'03.8"N 73°55'17.6"W; Buritaca River, Sierra Nevada de Santa Marta, Colombia	Marathrum utile - AP1B	Thallus	TSA													Not tested	Not tested	Not tested	Not tested	Not tested	0	0	0
AP1.04A	11°03'03.8"N 73°55'17.6"W; Buritaca River, Sierra Nevada de Santa Marta, Colombia	Marathrum utile - AP1A	Thallus	TSA	ATCGGATTACTGGGCGTAAGCGCACGCAGGCGGTCTGTCAAGTCGGATGTGAAATCCCCGGGCTCAACCT GGGAACTGCATCCGAAACTGGCAGGCTAGAGTCTTGTAGAGGGGGGTAGAATTCCAGGTGTAGCGGTGAA ATGCGTAGAGATCTGGAGGAATACCGGTGGCGAAGGCGGCCCCCTGGACAAAGACTGACGCTCAGGTGCG AAAGCGTGGGGAGCAAACAGGATTAGATACCCTGGTAGTCCACGCCGTAAACGATGTCGACTTGGAGGTT GTGCCCTTGAGGCGTGGCTTCCGGAGCTAACGCGTTAAGTCGACCGCCTGGGGAGTACGGCCGCAAGGTT AAAACTCAAATGAATTGACGGGGGCCCGCACAAGCGGTGGAGCA…	PZ394757	98.9	469	Enterobacter mori	k__Bacteria	p__Proteobacteria	c__Gammaproteobacteria	o__Enterobacterales	f__Enterobacteriaceae	g__Enterobacter	s__mori	Not tested	Not tested	Not tested	Not tested	Not tested	0	1	0
AP1.04B	11°03'03.8"N 73°55'17.6"W; Buritaca River, Sierra Nevada de Santa Marta, Colombia	Marathrum utile - AP1B	Thallus	TSA	CGTAAAGCGCACgcagGCcgGtttgTtaagTCaGATGTgAaaTCCCCGaGCTCAACcTGGGAACTGCATTTGAAACTGGCAGCTAGAGTCTTGTAGAGGGGGGTAGAATTCCAGGTGTAGCGGTGAAATGCGTAGAGATCTGGAGGAATACCGGTGGCGAAGGCGGCCCCCTGGACAAAGACTGACCCTCAGGTGCGAAAGCGTGGGGAGCAAACAGGATTAGATACCCTGGTAgTcCACGCTGT	PZ394758	98	245	Serratia aquatilis	k__Bacteria	p__Proteobacteria	c__Gammaproteobacteria	o__Enterobacterales	f__Enterobacteriaceae	g__Serratia	s__aquatilis	Not tested	Not tested	Not tested	Not tested	Not tested	0	0	0
AP1.05A	11°03'03.8"N 73°55'17.6"W; Buritaca River, Sierra Nevada de Santa Marta, Colombia	Marathrum utile - AP1A	Thallus	TSA	AtCGGATTACTGGGCGTAAGCGCACGCAGGCGGTTGATTAAGTCAGATGTGAAATCCCCGAGCTTAACTTGGGAACTGCATTTGAAACTGGTCAGCTAGAGTCTTGTAGAGGGGGGTAGAATTCCAGGTGTAGCGGTGAAATGCGTAGAGATCTGGAGGAATACCGGTGGCGAAGGCGGCCCCCTGGACAAAGACTGACGCTCAGGTGCGAAAGCGTGGGGAGCAAACAGGATTAGATACCCTGGTAGTCCACGCTGTAAACGATGTCGACTTGGAGGTTGTGCCCTTGAGGCGTGGCTTCCGGAGCTAACGCGTTAAGTCGACCGCCTGGGGAGTACGGCCGCAAGGTTAAAACTCAAATGAATTGACGGGGGCCCGCACAAGCGGTGGAGCATGTGG…	PZ394759	99.8	829	Hafnia alvei	k__Bacteria	p__Proteobacteria	c__Gammaproteobacteria	o__Enterobacterales	f__Hafniaceae	g__Hafnia	s__alvei	Not tested	Not tested	Not tested	Not tested	Not tested	0	2	2
AP1.05B	11°03'03.8"N 73°55'17.6"W; Buritaca River, Sierra Nevada de Santa Marta, Colombia	Marathrum utile - AP1B	Thallus	TSA	CGGAttaTTGGGCGTAAGCGCGCGCAGGCGGTTTCTTAAGTCTGATGTGAAAGCCCCCGGCTCAACCGGGGAGGGTCATTGGAAACTGGGAAACTTGAGTGCAGAAGAGGAAAGTGGAATTCCAAGTGTAGCGGTGAAATGCGTAGAGATTTGGAGGAACACCAGTGGCGAAGGCGACTTTCTGGTCTGTAACTGACGCTGAGGCGCGAAAGCGTGGGGAGCAAACAGGATTAGATACCCTGGTAGTCCACGCTGTAAACGATGAGTGCTAAGTGTTAGAGGGTTTCCGCCCTTTAGTGCTGAAGTTAACGCATTAAGCACTCCGCCTGGGGAGTACGGTCGCAAGACTGAAACTCAAAGGAATTGACGGGGGCCCGCACAAGTGGTGGAGCATGTGGT…	PZ394760	98.8	521	Gottfriedia endophytica	k__Bacteria	p__Firmicutes	c__Bacilli	o__Bacillales	f__Bacillaceae	g__Gottfriedia	s__endophytica	Not tested	Not tested	Not tested	Not tested	Not tested	0	0	0
AP1.06A	11°03'03.8"N 73°55'17.6"W; Buritaca River, Sierra Nevada de Santa Marta, Colombia	Marathrum utile - AP1A	Thallus	Kings B	TTAATCGGAtTaCTGGGCGTAAGCGCACGCAGGCGGTCTGTCAAGTCGGATGTGAAATCCCCGGGCTCAACCTGGGAACTGCATCCGAAACTGGCAGGCTAGAGTCTTGTAGAGGGGGGTAGAATTCCAGGTGTAGCGGTGAAATGCGTAGAGATCTGGAGGAATACCGGTGGCGAAGGCGGCCCCCTGGACAAAGACTGACGCTCAGGTGCGAAAGCGTGGGGAGCAAACAGGATTAGATACCCTGGTAGTCCACGCCGTAAACGATGTCGACTTGGAGGTTGTGCCCTTGAGGCGTGGCTTCCGGAGCTAACGCGTTAAGTCGACCGCCTGGGGAGTACGGCCGCAAGGTTAAAACTCAAATGAATTGACGGGGGCCCGCACAAGCGGTGGAGCATG…	PZ394761	99.5	772	Citrobacter freundii	k__Bacteria	p__Proteobacteria	c__Gammaproteobacteria	o__Enterobacterales	f__Enterobacteriaceae	g__Citrobacter	s__freundii	Not tested	Not tested	Not tested	Not tested	Not tested	0	0	0
AP1.06B	11°03'03.8"N 73°55'17.6"W; Buritaca River, Sierra Nevada de Santa Marta, Colombia	Marathrum utile - AP1B	Thallus	TSA	GAATCCCtGGGCTCaCCtGGGAaCtGCaTtTGAACTGGTAGGCTtGGTCTTGagAGGGGGGTggAATTCCAGGTGTAGCGGTGAAATGCgAAgATATTCGGAGGATACCGgtGGCGAAGGCGGCTCCCTGGTCATTACTGACGCTAGGTGCgAAAGCGTGGGGaGCAAACGGGATTAGATACCTTGTTAGTCCGCGCGTTAACgAAGAAAgTA	PZ394762	88.7	213	Salmonella enterica	k__Bacteria	p__Proteobacteria	c__Actinomycetia	o__Enterobacterales	f__Enterobacteriaceae	g__Salmonella	s__electrica	Not tested	Not tested	Not tested	Not tested	Not tested	0	0	0
AP1.07A	11°03'03.8"N 73°55'17.6"W; Buritaca River, Sierra Nevada de Santa Marta, Colombia	Marathrum utile - AP1A	Thallus	Kings B	TAAtcgGGATTACTGGGCGTaaagCGCACGCAGGCGGTCTGTCAAGTCGGATGTGAAATCCCCGGGCTCAACCTGGGAACTGCATCCGAAACTGGCAGGCTAGAGTCTTGTAGAGGGGGGTAGAATTCCAGGTGTAGCGGTGAAATGCGTAGAGATCTGGAGGAATACCGGTGGCGAAGGCGGCCCCCTGGACAAAGACTGACGCTCAGGTGCGAAAGCGTGGGGAGCAAACAGGATTAGATACCCTGGTAGTCCACGCCGTAAACGATGTCGACTTGGAGGTTGTGCCCTTGAGGCGTGGCTTCCGGAGCTAACGCGTTAAGTCGACCGCCTGGGGAGTACGGCCGCAAGGTTAAAACTCAAATGAATTGACGGGGGCCCGCACAAgCGGTGGAGCAT…	PZ394763	99.1	583	Citrobacter freundii	k__Bacteria	p__Proteobacteria	c__Gammaproteobacteria	o__Enterobacterales	f__Enterobacteriaceae	g__Citrobacter	s__freundii	Not tested	Not tested	Not tested	Not tested	Not tested	0	0	0
AP1.07B	11°03'03.8"N 73°55'17.6"W; Buritaca River, Sierra Nevada de Santa Marta, Colombia	Marathrum utile - AP1B	Thallus	TSA	TGgGCgTAAAGCGCGCGTaggcgGcTTTTTAAGTCTGGTGTTAAATCCTTGGGCTCAacCtGgGGtCtcACTGGgAACGGGTGGCTTGagTACtgagAAGaaAgTGGAATTCCacGGtGGACGGTGAAATTCGTAAATAAGTGGAGGAACACCAGTGGcgAAAGGCAgTTTCTGGGCCGTAACTGGCGCTGAGGCtCGAAAGCCTGGGGAGCAAATGGGATTTGATACCCTGGTAGTCCACGCCGTAAACGAAGAgTGCTAAGTGTTAGGGGTTTCAATACCCTTGGTGCC	PZ394764	90.2	291	Paenibacillus azotifigens	k__Bacteria	p__Firmicutes	c__Bacilli	o__Paenibacillales	f__Paenibacillaceae	g__Paenibacillus	s__azotifigens	Not tested	Not tested	Not tested	Not tested	Not tested	0	0	1
AP1.08A	11°03'03.8"N 73°55'17.6"W; Buritaca River, Sierra Nevada de Santa Marta, Colombia	Marathrum utile - AP1A	Thallus	Kings B	ATCGGATTACTGGGCGTAAGCGCACGCAGGCGGTCTGTCAAGTCGGATGTGAAATCCCCGGGCTCAACCTGGGAACTGCATCCGAAACTGGCAGGCTAGAGTCTTGTAGAGGGGGGTAGAATTCCAGGTGTAGCGGTGAAATGCGTAGAGATCTGGAGGAATACCGGTGGCGAAGGCGGCCCCCTGGACAAAGACTGACGCTCAGGTGCGAAAGCGTGGGGAGCAAACAGGATTAGATACCCTGGTAGTCCACGCCGTAAACGATGTCGACTTGGAGGTTGTGCCCTTGAGGCGTGGCTTCCGGAGCTAACGCGTTAAGTCGACCGCCTGGGGAGTACGGCCGCAAGGTTAAAACTCAAATGAATTGACGGGGGCCCGCACAAGCGGTGGAGCATGTGG…	PZ394765	99.8	836	Citrobacter freundii	k__Bacteria	p__Proteobacteria	c__Gammaproteobacteria	o__Enterobacterales	f__Enterobacteriaceae	g__Citrobacter	s__freundii	Not tested	Not tested	Not tested	Not tested	Not tested	0	0	0
AP1.08B	11°03'03.8"N 73°55'17.6"W; Buritaca River, Sierra Nevada de Santa Marta, Colombia	Marathrum utile - AP1B	Thallus	Kings B	tacTGgGgcgTaaaGcgcaCgCAGGCGGtctgTTAaGTCggAtGTGAAATCCCCGGGGCTCAACCTGGGAACTGCATT		97.5	78	Enterobacter cloacae	k__Bacteria	p__Proteobacteria	c__Gammaproteobacteria	o__Enterobacterales	f__Enterobacteriaceae	g__Enterobacter	s__cloacae	Not tested	Not tested	Not tested	Not tested	Not tested	0	0	0
AP1.09A	11°03'03.8"N 73°55'17.6"W; Buritaca River, Sierra Nevada de Santa Marta, Colombia	Marathrum utile - AP1A	Thallus	Kings B	AttaCTGGGCGTaAAGCGCACGCAGGGCGGTCTGTCAaGTCGGATGTGAAATCCCCGGGCTCAACCTGGGAACTGCATCCGAAACTGGCAGGCTAGAGTCTTGTAGAGGGGGGTAGAATTCCAGGTGTAGCGGTGAAATGCGTAGAGATCTGGAGGAATACCGGTGGCGAAGGCGGCCCCCTGGACAAAGACTGACGCTCAGGTGCGAAAGCGTGGGGAGCAAACAGGATTAGATACCCTGGTAGTCCACGCCGTAAACGATGTCGACTTGGAGGTTGTGCCCTTGAGGCGTGGCTTCCGGAGCTAACGCGTTAAGTCGACCGCCTGGGGAGTACGGCCGCAAGGTTAAAACTCAAATGAATTGACGGGGGCCCGCACAAGCGGTGGAGCATGTGGTTT…	PZ394766	99.3	797	Enterobacter asburiae	k__Bacteria	p__Proteobacteria	c__Gammaproteobacteria	o__Enterobacterales	f__Enterobacteriaceae	g__Enterobacter	s__asburiae	Not tested	Not tested	Not tested	Not tested	Not tested	0	2	2
AP1.09B	11°03'03.8"N 73°55'17.6"W; Buritaca River, Sierra Nevada de Santa Marta, Colombia	Marathrum utile - AP1B	Thallus	Kings B	CTcaactggaggAACagcATTagAAActggtcactAGAgTCTAgtggagggtggtagattccATTTgTc		84.6	69	Hafnia alvei	k__Bacteria	p__Proteobacteria	c__Gammaproteobacteria	o__Enterobacterales	f__Hafniaceae	g__Hafnia	s__alvei	Not tested	Not tested	Not tested	Not tested	Not tested	0	0	0
AP1.10A	11°03'03.8"N 73°55'17.6"W; Buritaca River, Sierra Nevada de Santa Marta, Colombia	Marathrum utile - AP1A	Thallus	Kings B	CTGGGCGTaagCGCACGCAGGCGGTCTGTCAaGTCGGAtGTGAAATCCCCGGGCTCAACCTGGGAACTGCATtCGAAACTGGCAGGCTAGAGTCTTGTAGAGGGGGGTAGAATTCCAGGTGTAGCGGTGAAATGCGTAGAGATCTGGAGGAATACCGGTGGCGAAGGCGGCCCCCTGGACAAAGACTGACGCTCAGGTGCGAAAGCGTGGGGAGCAAACAGGATTAGATACCCTGGTAGTCCACGCCGTAAACGATGTCGACTTGGAGGTTGTGCCCTTGAGGCGTGGCTTCCGGAGCTAACGCGTTAAGTCGACCGCCTGGGGAGTACGGCCGCAAGGTTAAAACTCAAATGAATTGACGGGGGCCCGCACAAGCGGTGGAGCATGTGGTTTAATTCG…	PZ394767	99.8	513	Enterobacter asburiae	k__Bacteria	p__Proteobacteria	c__Gammaproteobacteria	o__Enterobacterales	f__Enterobacteriaceae	g__Enterobacter	s__asburiae	Not tested	Not tested	Not tested	Not tested	Not tested	0	0	0
AP1.10B	11°03'03.8"N 73°55'17.6"W; Buritaca River, Sierra Nevada de Santa Marta, Colombia	Marathrum utile - AP1B	Thallus	Kings B													Not tested	Not tested	Not tested	Not tested	Not tested	0	0	0
AP1.11A	11°03'03.8"N 73°55'17.6"W; Buritaca River, Sierra Nevada de Santa Marta, Colombia	Marathrum utile - AP1A	Thallus	Kings B	TGgGCGTaaagCGCACGCAGGGCgGTctgTtaagTCgGATGTGAAATCCCCGGGCTCAACCTGGGAACTGCATTCGAAACTGGCAGGCTAGAGTCTTGTAGAGGGGGGTAGAATTCCAGGTGTAGCGGTGAAATGCgTAGAGATCTGGAGGAATACCGGTGGCGAAGGCGGCCCCCTGGACAAAGACTGACGCTCAGGTGCGAAAGCGTGGGAGGCAAACAGGATTAGATACCCGGTTGGTCCACGCCCGTAAACGATGtCGACTTGTAGGTTGGGCCCTTgAGCCGTGGCTTCCGGAGCTAACGGGTTAAGTCAACCGCCTGGGGggTACGGCCCCAGGGTTAAACCTCAAAgGAATtGACGGGGGCCCGCcCAAGCcGGTGGAGCTGGTGGTTTATT…	PZ394768	93.5	458	Enterobacter hormaechei	k__Bacteria	p__Proteobacteria	c__Gammaproteobacteria	o__Enterobacterales	f__Enterobacteriaceae	g__Enterobacter	s__hormaechei	Not tested	Not tested	Not tested	Not tested	Not tested	0	0	0
AP1.11B	11°03'03.8"N 73°55'17.6"W; Buritaca River, Sierra Nevada de Santa Marta, Colombia	Marathrum utile - AP1B	Thallus	Kings B	AtatTGGGCGTAAGCGCGCGCAGGTGGTTTCTTAAGTCTGatgtGAAAGCCCACGGCTCAACCGTGGAGGGTCATTGGAAACTGGGAAACTTGAGTGCAGAAGAGGATAGTGGAATTCCAAGTGTAGCGGTGAAATGCGTAGAGATTTGGAGGAACACCAGTGGCGAAGGCGACTATCTGGTCTGTAACTGACACTGAGGCGCGAAAGCGTGGGGAGCAAACAGGATTAGATACCCTGGTAGTCCACGCCGTAAACGATGAGTGCTAAGTGTTGGGGGGTTTCCGCCCCTCAGTGCTGCAGCTAACGCATTAAGCACTCCGCCTGGGGAGTACGGTCGCAAGACTGAAACTCAAAGGAATTGACGGGGGCCCGCACAAGCGGTGGAGCATGTGGTTTAA…	PZ394769	98.6	510	Lysinibacillus tabacifolii	k__Bacteria	p__Firmicutes	c__Bacilli	o__Caryophanales	f__ Caryophanaceae	g__Lysinibacillus	s__tabacifolii	Not tested	Not tested	Not tested	Not tested	Not tested	0	0	0
AP1.12A	11°03'03.8"N 73°55'17.6"W; Buritaca River, Sierra Nevada de Santa Marta, Colombia	Marathrum utile - AP1A	Thallus	Kings B	GCAGGCGGTCTGTCAAGTCGGATGTGAAATCCCCGGGCTCAACCTGGGAACTGCATCCGAAACTGGCAGGCTAGAGTCTTGTAGAGGGGGGTAGAATTCCAGGTGTAGCGGTGAAATGCGTAGAGATCTGGAGGAATACCGGTGGCGAAGGCGGCCCCCTGGACAAAGACTGACGCTCAGGTGCGAAAGCGTGGGGAGCAAACAGGATTAGATACCCTGGTAGTCCACGCCGTAAACGATGTCGACTTGGAGGTTGTGCCCTTGAGGCGTGGCTTCCGGAGCTAACGCGTTAAGTCGACCGCCTGGGGAGTACGGCCGCAAGGTTAAAACTCAAATGAATTGACGGGGGCCCGCACAAGCGGTGGAGCATGTGGTTTAATTCGATGCAACGCGAAGAAC…	PZ394770	100	490	Citrobacter freundii	k__Bacteria	p__Proteobacteria	c__Gammaproteobacteria	o__Enterobacterales	f__Enterobacteriaceae	g__Citrobacter	s__freundii	Not tested	Not tested	Not tested	Not tested	Not tested	0	0	0
AP1.12B	11°03'03.8"N 73°55'17.6"W; Buritaca River, Sierra Nevada de Santa Marta, Colombia	Marathrum utile - AP1B	Thallus	Kings B	AGCGCGgtctctTAAgTCCgAaGTGaaaGCcCaCGGCtCCACCGTGGAGCGTCATTGGAAACTGtgAAACTTGAGTGCCGAAGAGGATAGTGGAATTCCAAGTGTAGCGGTGAAATGCGTAGAGATTTGGAGGAACACCAGTGGCGAAGGCGACTATCTGGTCTGTAACTGACACTGAGGCGCGAAAGCGTGGGGAGCAAACAGGATTAGATACCCTGGTAGTCCACGCCGTAAACGATGAGTGCTAAGTGTTGGGGGGTTTCCGCCCCTCAGTGCTGCAGCTAACGCATTAAgCACTCCGCCTGGGGAGTACGGTCGCAAGACTGAAACTCAAAGGAATTGACGGGGGCCCGCACAAGCGGTGGAGCatGTGGTTTAATTCGAAGCAACGCGAAGAAC…	PZ394771	97	480	Lysinibacillus tabacifolii	k__Bacteria	p__Firmicutes	c__Bacilli	o__Caryophanales	f__ Caryophanaceae	g__Lysinibacillus	s__tabacifolii	Not tested	Not tested	Not tested	Not tested	Not tested	0	0	0
AP1.13A	11°03'03.8"N 73°55'17.6"W; Buritaca River, Sierra Nevada de Santa Marta, Colombia	Marathrum utile - AP1A	Thallus	Kings B	ATCGGAtaCTGGGCGTAAGCGCACGCAGGCGGTCTGTCAAGTCGGaTGTGAAATCCCCGGGCTCAACCTGGGAACTGCATTCGAAACTGGCAGGCTAGAGTCTTGTAGAGGGGGGTAGAATTCCAGGTGTAGCGGTGAAATGCGTAGAGATCTGGAGGAATACCGGTGGCGAAGGCGGCCCCCTGGACAAAGACTGACGCTCAGGTGCGAAAGCGTGGGGAGCAAACAGGATTAGATACCCTGGTAGTCCACGCCGTAAACGATGTCGACTTGGAGGTTGTGCCCTTGAGGCGTGGCTTCCGGAGCTAACGCGTTAAGTCGACCGCCTGGGGAGTACGGCCGCAAGGTTAAAACTCAAATGAATTGACGGGGGCCCGCACAAGCGGTGGAGCATGTGGT…	PZ394772	99.8	835	Enterobacter cloacae	k__Bacteria	p__Proteobacteria	c__Gammaproteobacteria	o__Enterobacterales	f__Enterobacteriaceae	g__Enterobacter	s__cloacae	Not tested	Not tested	Not tested	Not tested	Not tested	0	0	0
AP1.13B	11°03'03.8"N 73°55'17.6"W; Buritaca River, Sierra Nevada de Santa Marta, Colombia	Marathrum utile - AP1B	Thallus	Kings B	TCGGatTACTGGGCGTAAGCGTGCGTAGGTGGTCGTTTAAGTCCGTTGTGAAAGCCCTGGGCTCAACCTGGGAACTGCAGTGGATACTGGGCGACTAGAGTGTGGTAGAGGGTAGCGGAATTCCTGGTGTAGCAGTGAAATGCGTAGAGATCAGGAGGAACATCCATGGCGAAGGCAGCTACCTGGACCAACACTGACACTGAGGCACGAAAGCGTGGGGAGCAAACAGGATTAGATACCCTGGTAGTCCACGCCCTAAACGATGCGAACTGGATGTTGGGTGCAATTTGGCACGCAGTATCGAAGCTAACGCGTTAAGTTCGCCGCCTGGGGAGTACGGTCGCAAGACTGAAACTCAAAGGAATTGACGGGGGCCCGCACAAGCGGTGGAGTATGTGG…	PZ394773	99.8	806	Stenotrophomonas maltophilia	k__Bacteria	p__Proteobacteria	c__Gammaproteobacteria	o__Xanthomonadales	f__Xanthomonadaceae	g__Stenotrophomonas	s__maltophilia	Not tested	Not tested	Not tested	Not tested	Not tested	0	0	0
AP1.14A	11°03'03.8"N 73°55'17.6"W; Buritaca River, Sierra Nevada de Santa Marta, Colombia	Marathrum utile - AP1A	Thallus	Kings B	TaaagCGCACGCaggCgGTCTgTTaagTCGGATGTGAaaTCCCCGGGCTCAACCTGGGAACTGCATTCGAAACTGGCAGCTAgAgGCTTGTAGAGGGGGgTAGAATTCCaGGTGTAGCGGTGAAATGCGTAGAGATCTGAAGGAATACCGGTGGCGAAgGCagCGCCCTGGACaGAACTGaCgCTCAgagtgCgagaGctGgGAagGGAAcAGAATtAcAGGCACTGTAGTCcacaCcGAGACA	PZ394774	98	244	Enterobacter cloacae	k__Bacteria	p__Proteobacteria	c__Gammaproteobacteria	o__Enterobacterales	f__Enterobacteriaceae	g__Enterobacter	s__cloacae	Not tested	Not tested	Not tested	Not tested	Not tested	0	2	2
AP1.15B	11°03'03.8"N 73°55'17.6"W; Buritaca River, Sierra Nevada de Santa Marta, Colombia	Marathrum utile - AP1B	Thallus	PDA	GGActgaAAGCCCACGGATCAaCCgAGGaGGGTCATTGGAAACTGGCAGAcTGAGTGCAGAAGAGGAAAGTGGAATTCCATGtgTAGCGTGAAATGCGTAGAGATATGGAGGAACACCaGTGgCGAATGCGACTTTCTGGTCTGCaaCTGACACTGAggCgCGAAaGCgTGGGGAGCaAACAGGAATA	PZ394775	96.7	188	Bacillus rhizoplanae	k__Bacteria	p__Firmicutes	c__Bacilli	o__Bacillales	f__Bacillaceae	g__Bacillus	s__rhizoplanae	Not tested	Not tested	Not tested	Not tested	Not tested	0	0	0
AP2.01A	11°03'03.8"N 73°55'17.6"W; Buritaca River, Sierra Nevada de Santa Marta, Colombia	Marathrum utile - AP2A	Thallus	TSA	CGCACGCaGGcggtctgTTAAGTCgGgGTgaATCCCcGggctcaCctGgGAACTGCATttGAACTGgtgGCTAGAgTCTtGtAGAGGGgGGtGGAATTCCAGGTGtAgCGGTGAAAtTGTAGAGTTCTGgAggAatacCGGTGGcgaagGCGgACTTTcTGGATcCAGC	PZ394776	91.8	169	Klebsiella aerogenes	k__Bacteria	p__Proteobacteria	c__Gammaproteobacteria	o__Enterobacterales	f__Enterobacteriaceae	g__Klebsiella	s__aerogenes	Not tested	Not tested	Not tested	Not tested	Not tested	0	2	2
AP2.01B	11°03'03.8"N 73°55'17.6"W; Buritaca River, Sierra Nevada de Santa Marta, Colombia	Marathrum utile - AP2B	Thallus	TSA	ATTACtGgGgCgTaagCGCaCGCAgGCGGtCTGTCAAGTCGGATGTGAAATCCCCGGGCTCAACCTGGGAACTGCATTCGAAACTGGCAGGCTAGAGTCTTGTAGAGGGGGGTAGAATTCCAGGTGTAGCGGTGAAATGCGTAGAGATCTGGAGGAATACCGGTGGCGAAGGCGGCCCCCTGGACAAAGACTGACGCTCAGGTGCGAAAGCGTGGGGAGCAAACCGGATTAGAAAC	PZ394777	99.6	236	Enterobacter cloacae	k__Bacteria	p__Proteobacteria	c__Gammaproteobacteria	o__Enterobacterales	f__Enterobacteriaceae	g__Enterobacter	s__cloacae	Not tested	Not tested	Not tested	Not tested	Not tested	0	0	0
AP2.02A	11°03'03.8"N 73°55'17.6"W; Buritaca River, Sierra Nevada de Santa Marta, Colombia	Marathrum utile - AP2A	Thallus	TSA	TACTGGGCGTAAAGCGCACGCAGGCGGTCTGTCAAGTCGGATGTGAAATCCCCGGGCTCAACCTGGGAACTGCATTCGAAACTGGCAGGCTGGAGTCTCGTAGAGGGAGGTAGAATTCCAGGTGTAGCGGTGAAATGCGTAGAGATCTGGAGGAATACCGGTGGCGAAGGCGGCCTCCTGGACGAAGACTGACGCTCAGGTGCGAAAGCGTGGGGAGCAAACAGGATTAGATACCCTGGTAGTCCACGCTGTAAACGATGTCGATTTGGAGGTTGTGCCCTTGAGGCGTGGCTTCCGGAGCTAACGCGTTAAATCGACCGCCTGGGGAGTACGGCCGCAAGGTTAAAACTCAAATGAATTGACGGGGGCCCGCACAAGCGGTGGAGCATGTGGTTTAAT…	PZ394778	100	482	Kosakonia oryzendophytica	k__Bacteria	p__Proteobacteria	c__Gammaproteobacteria	o__Enterobacterales	f__Enterobacteriaceae	g__Kosakonia	s__ oryzendophytica	Not tested	Not tested	Not tested	Not tested	Not tested	0	2	2
AP2.02B	11°03'03.8"N 73°55'17.6"W; Buritaca River, Sierra Nevada de Santa Marta, Colombia	Marathrum utile - AP2B	Thallus	TSA													Not tested	Not tested	Not tested	Not tested	Not tested	0	0	0
AP2.03A	11°03'03.8"N 73°55'17.6"W; Buritaca River, Sierra Nevada de Santa Marta, Colombia	Marathrum utile - AP2A	Thallus	TSA	AttaCTGGGCgTaagCGCACGCAGGCGGTCTGTCAAGTCGGAtGtGAAATCCCCGGGCTCAACCTGGGAACTGCATTCGAAACTGGCAGGCTGGAGTCTTGTAGAGGGGGGTAGAATTCCAGGTGTAGCGGTGAAATGCGTAGAGATCTGGAGGAATACCGGTGGCGAAGGCGGCCCCCTGGACAAAGACTGACGCTCAGGTGCGAAAGCGTGGGGAGCAAACAGGATTAGATACCCTGGTAGTCCACGCTGTAAACGATGTCGATTTGGAGGTTGTGCCCTTGAGGCGTGGCTTCCGGAGCTAACGCGTTAAATCGACCGCCTGGGGAGTACGGCCGCAAGGTTAAAACTCAAATGAATTGACGGGGGCCCGCAACAAGCGGTGGAGCATGTGGGTTT…	PZ394779	98.5	461	Klebsiella variicola	k__Bacteria	p__Proteobacteria	c__Gammaproteobacteria	o__Enterobacterales	f__Enterobacteriaceae	g__Klebsiella	s__variicola	Not tested	Not tested	Not tested	Not tested	Not tested	0	0	0
AP2.03B	11°03'03.8"N 73°55'17.6"W; Buritaca River, Sierra Nevada de Santa Marta, Colombia	Marathrum utile - AP2B	Thallus	TSA	AtaTTGGGCGTAAAgCGCGCGCAGGCGGCTATTTAAGTCTGGTGTTTAAACCTTGGGCTCAACCTGAGGTCGCACTGGAAACTGGGTGGCTTGAGTACAGAAGAGGAAAGTGGAATTCCACGTGTAGCGGTGAAATGCGTAGATATGTGGAGGAACACCAGTGGCGAAGGCGACTTTCTGGGCTGTAACTGACGCTGAGGCGCGAAAGCGTGGGGAGCAAACAGGATTAGATACCCTGGTAGTCCACGCCGTAAACGATGAGTGCTAGGTGTTAGGGGTTTCGATACCCTTGGTGCCGAAGTTAACACAGTAAGCACTCCGCCTGGGGAGTACGGTCGCAAGACTGAAACTCAAAGGAATTGACGGGGACCCGCACAAGCAGTGGAGTATGTGGTTTAA…	PZ394780	99.8	512	Paenibacillus taohuashanense	k__Bacteria	p__Firmicutes	c__Bacilli	o__Paenibacillales	f__Paenibacillaceae	g__Paenibacillus	s__ taohuashanense	Not tested	Not tested	Not tested	Not tested	Not tested	0	0	1
AP2.04A	11°03'03.8"N 73°55'17.6"W; Buritaca River, Sierra Nevada de Santa Marta, Colombia	Marathrum utile - AP2A	Thallus	TSA	aTTaCTGGGCGTaagCGCACGCAGGCGGTtCTGTCAAGTCGGATGTGAAATCCCCGGGCTCAACCTGGGAACTGCATTCGAAACTGGCAGGCTAGAGTCTTGTAGAGGGGGGTAGAATTCCAGGTGTAGCGGTGAAATGCGTAGAGATCTGGAGGAATACCGGTGGCGAAGGCGGCCCCCTGGACAAAGACTGACGCTCAGGTGCGAAAGCGTGGGGAGCAAACAGGATTAGATACCCTGGTAGTCCACGCTGTAAACGATGTCGATTTGGAGGTTGTGCCCTTGAGGCGTGGCTTCCGGAGCTAACGCGTTAAATCGACCGCCTGGGGAGTACGGCCGCAAGGTTAAAACTCAAATGAATTGACGGGGGCCCGCACAAGCGGTGGAGCATGTGGTTTA…	PZ394781	99.5	818	Klebsiella variicola	k__Bacteria	p__Proteobacteria	c__Gammaproteobacteria	o__Enterobacterales	f__Enterobacteriaceae	g__Klebsiella	s__variicola	Not tested	Not tested	Not tested	Not tested	Not tested	0	0	0
AP2.04B	11°03'03.8"N 73°55'17.6"W; Buritaca River, Sierra Nevada de Santa Marta, Colombia	Marathrum utile - AP2B	Thallus	TSA	TCGGATTACTGGGCGTAAGCGTGCGTAGGTGGTCGTTTAAGTCCGTTGTGAAAGCCCTGGGCTCAACCTG GGAACTGCAGTGGATACTGGGCGACTAGAGTGTGGTAGAGGGTAGCGGAATTCCTGGTGTAGCAGTGAAA TGCGTAGAGATCAGGAGGAACATCCATGGCGAAGGCAGCTACCTGGACCAACACTGACACTGAGGCACGA AAGCGTGGGGAGCAAACAGGATTAGATACCCTGGTAGTCCACGCCCTAAACGATGCGAACTGGATGTTGG GTGCAATTTGGCACGCAGTATCGAAGCTAACGCGTTAAGTTCGCCGCCTGGGGAGTACGGTCGCAAGACT GAAACTCAAAGGAATTGACGGGGGCCCGCACAAGCGGTGGAGTA…	PZ394782	99.7	766	Stenotrophomonas maltophilia	k__Bacteria	p__Proteobacteria	c__Gammaproteobacteria	o__Xanthomonadales	f__Xanthomonadaceae	g__Stenotrophomonas	s__maltophilia	Not tested	Not tested	Not tested	Not tested	Not tested	0	0	0
AP2.05A	11°03'03.8"N 73°55'17.6"W; Buritaca River, Sierra Nevada de Santa Marta, Colombia	Marathrum utile - AP2A	Thallus	TSA	CGGAttACTGGGCGTaagCGCACGCAGGCGGTTGATTAAGTCAGATGTGAAATCCCCGAGCTTAACTTGGGAACTGCATTTGAAACTGGTCAGCTAGAGTCTTGTAGAGGGGGGTAGAATTCCAGGTGTAGCGGTGAAATGCGTAGAGATCTGGAGGAATACCGGTGGCGAAGGCGGCCCCCTGGACAAAGACTGACGCTCAGGTGCGAAAGCGTGGGGAGCAAACAGGATTAGATACCCTGGTAGTCCACGCTGTAAACGATGTCGACTTGGAGGTTGTGCCCTTGAGGCGTGGCTTCCGGAGCTAACGCGTTAAGTCGACCGCCTGGGGAGTACGGCCGCAAGGTTAAAACTCAAATGAATTGACGGGGGCCCGCACAAGCGGTGGAGCATGTGGTT…	PZ394783	99.6	836	Obesumbacterium proteus	k__Bacteria	p__Proteobacteria	c__Gammaproteobacteria	o__Enterobacterales	f__Hafniaceae	g__Obesumbacterium	s__proteus	Not tested	Not tested	Not tested	Not tested	Not tested	0	0	0
AP2.05B	11°03'03.8"N 73°55'17.6"W; Buritaca River, Sierra Nevada de Santa Marta, Colombia	Marathrum utile - AP2B	Thallus	TSA	TTGaTTAAGTCAGATGTGAAATCCCCGAGCTTAACTTGGGAACTGCATTTGAAACTGGCCAGCTAGAGTCTTGTAGAGGGGGGTAGAATTCCAGGTGTAGCGGTGAAATGCGTAGAGATCTGGAGGAATACCGGTGGCGAAgGCGGCCCCCTGGACAAAGACTGACGCTCAGGTGCgaAAGCGTGGGGAGCAAACaGGATTAgATACCCTGGTaGTCACGCTGTAAACGATGTCAACTTGGAGGTTG	PZ394784	98.8	247	Hafnia alvei	k__Bacteria	p__Proteobacteria	c__Gammaproteobacteria	o__Enterobacterales	f__Hafniaceae	g__Hafnia	s__alvei	Not tested	Not tested	Not tested	Not tested	Not tested	0	0	0
AP2.06A	11°03'03.8"N 73°55'17.6"W; Buritaca River, Sierra Nevada de Santa Marta, Colombia	Marathrum utile - AP2A	Thallus	TSA	GgCgTAAAGCGCACGCagCgGTCTTTTAAGTCgGAtGTGAAATCCCCgGGCTCAAccTGGGAAcTGCATTTGAACTGGGaGCtaGagTCTTGTAGAGGGGGGTAGAATTCCAGGTGTAGCggTGAaATGCGTGAGATCTGGAGGAGTACAGGTGGCGaagGCGGCCCCCtGgGAAAtACTGacGCTCAGCTGCGAAAGCTTGgGggCgAaCAGGATTA	PZ394785	92.9	218	Enterobacter hormaechei	k__Bacteria	p__Proteobacteria	c__Gammaproteobacteria	o__Enterobacterales	f__Enterobacteriaceae	g__Enterobacter	s__hormaechei	Not tested	Not tested	Not tested	Not tested	Not tested	0	0	0
AP2.06B	11°03'03.8"N 73°55'17.6"W; Buritaca River, Sierra Nevada de Santa Marta, Colombia	Marathrum utile - AP2B	Thallus	TSA	TGgGCGTAAgcGCGCGCAGGcggataaTTAAGTCTGATGTGAAATCCCTGGGCTCAACCTGGGAACtgCCTTCGAAACTGGTGGCttgAGTCTTGTAgAGgGGGGTAGATTTCCCGGTGTAGCGGTGAAATGCGTAAAGATTGGGGGGAATACCGGGGGCGAAGGCAGTCCCCGGGCCGAAAACTGACGCTCAGGTGCGAAAGCGTGGGGAGCAAACAGGATTAGAAACCCGGGTAGTCCGTACGTAAACGAAGAGTGCTAGGTGTTAGGGGTTtAAAAAAcCTTGGTGCCGAAGTTAACACAGTAAGCACTCCGCCTGGGGAGTACGGTCGCAAGACTGAAACTCAAAGGAATTGACGGGGACCCGCACAAGCAGTGGAGTATGTGGTTTAATTCGAA…	PZ394786	100	508	Paenibacillus tianjinensis	k__Bacteria	p__Firmicutes	c__Bacilli	o__Paenibacillales	f__Paenibacillaceae	g__Paenibacillus	s__tianjinensis	Not tested	Not tested	Not tested	Not tested	Not tested	0	0	0
AP2.07A	11°03'03.8"N 73°55'17.6"W; Buritaca River, Sierra Nevada de Santa Marta, Colombia	Marathrum utile - AP2A	Thallus	TSA	TCgGgAtacTGGGCgTaagCGCACGCAGGCGGTCTGTtAAGTCgGATGTGAAATCCCCGaGCTCAACCTGGGAACTGCATTCGAAACTGGCAGGCTAGAGTCTTGTAGAGGGGGGTAGAATTCCAGGTGTAGCGGTGAAATGCGTAGAGATCTGGAGGAATACCGGTGGCGAAGGCGGCCCCCTGGACAAAGACTGACGCTCAGGTGCGAAAGCGTGGGGAGCAAACAGGATTAGATACCCTGGTAGTCCACGCCGTAAACGATGTCGACTTGgAGGTTGTGCCCTTGAGGCGTGGCTTCCGGAGCTAACGCGTTAAGTCGACCGCCTGGGGAGTACGGCCGCAAGGTTAAAACTCAAATGAATTGACGGGGGCCCGCACAAGCGGTGGAGCATGTGGT…	PZ394787	98.9	463	Enterobacter asburiae	k__Bacteria	p__Proteobacteria	c__Gammaproteobacteria	o__Enterobacterales	f__Enterobacteriaceae	g__Enterobacter	s__asburiae	Not tested	Not tested	Not tested	Not tested	Not tested	0	0	0
AP2.07B	11°03'03.8"N 73°55'17.6"W; Buritaca River, Sierra Nevada de Santa Marta, Colombia	Marathrum utile - AP2B	Thallus	TSA													Not tested	Not tested	Not tested	Not tested	Not tested	0	2	0
AP2.08A	11°03'03.8"N 73°55'17.6"W; Buritaca River, Sierra Nevada de Santa Marta, Colombia	Marathrum utile - AP2A	Thallus	TSA	TCGGAttACTGGGCGTAAGCGTcgCGCAGGCGGTTtGttaagTCAGATGTgAaATCCCCGAgctcactTgggactGCATTtgtaaCTGggGGCTAGAGTCTTGtAGAgGGGGGTAGAATTCCACGTGTAGCGGTGAAATGCGTAGAGATcTGGAGGAATACCGGTGGCGAAGGCGGCCCCCTGGaCAAACACTGACGCTCAtGTGCGAAAGCGTGGGGAGCAAACAGGATTAGATACCCTGGTAGTCCACGCCgTAAACGATGTCaACTTGctGTTTGGGCCTTT	PZ394788	92.3	285	Serratia aquatilis	k__Bacteria	p__Proteobacteria	c__Gammaproteobacteria	o__Enterobacterales	f__Yersiniaceae	g__Serratia	s__aquatilis	Not tested	Not tested	Not tested	Not tested	Not tested	0	0	0
AP2.08B	11°03'03.8"N 73°55'17.6"W; Buritaca River, Sierra Nevada de Santa Marta, Colombia	Marathrum utile - AP2B	Thallus	TSA	ttGtccggaaTATTGggCaGtAAgcgcGcGCAGGCGGTCATTTAAGTCTGgtgttTTAATCCCGGgGCTCAACCcCGGATCGca		95.5	84	Paenibacillus taichungensis	k__Bacteria	p__Firmicutes	c__Bacilli	o__Paenibacillales	f__Paenibacillaceae	g__Paenibacillus	s__ taichungensis	Not tested	Not tested	Not tested	Not tested	Not tested	0	0	0
AP2.09A	11°03'03.8"N 73°55'17.6"W; Buritaca River, Sierra Nevada de Santa Marta, Colombia	Marathrum utile - AP2A	Thallus	Kings B	TACTGGGCGTaagCGCACGCAGGCGGTTGatTAAGTCAGAtGTGAAATCCCCGAGCTTAACTTGGGAACTGCATTTGAAACTGGTCAGCTAGAGTCTTGTAGAGGGGGGTAGAATTCCAGGTGTAGCGGTGAAATGCGTAGAGATCTGGAGGAATACCGGTGGCGAAGGCGGCCCCCTGGACAAAGACTGACGCTCAGGTGCGAAAGCGTGGGGAGCAAACAGGATTAGATACCCTGGTAGTCCACGCTGTAAACGATGTCGACTTGGAGGTTGTGCCCTTGAGGCGTGGCTTCCGGAGCTAACGCGTTAAGTCGACCGCCTGGGGAGTACGGCCGCAAGGTTAAAACTCAAATGAATTGACGGGGGCCCGCACAAGCGGTGGAGCATGTGGTTTAATT…	PZ394789	99.4	695	Obesumbacterium proteus	k__Bacteria	p__Proteobacteria	c__Gammaproteobacteria	o__Enterobacterales	f__Hafniaceae	g__Obesumbacterium	s__ proteus	Not tested	Not tested	Not tested	Not tested	Not tested	0	0	0
AP2.09B	11°03'03.8"N 73°55'17.6"W; Buritaca River, Sierra Nevada de Santa Marta, Colombia	Marathrum utile - AP2B	Thallus	TSA	GGgGCGtAAAGCGCGCgctTcgTAgttcttgAaGTTCAAgcGTGAAATCCAACCGTGcAgGgTCATTGcAaACTGGgAaACTTGAGTGCAGAAGAGGATAGTGGAATTCCAAGTGttCGGTGAAATGCGTAGAGATTTGGAGGAACACCAGTGGCGAAGGcgACTATCTGGTCTGTAACTGACACTGAGGCGCGAAAGCGTGGGGAGCAAACAGGATTAGATACCCTGGtAGTCCACGCCGTAAACGATGAGTGCTAAGTGTTGGGGGGTTTCCGCCCCTCAGTGCTGCAGCtAACGCATTAAGCACTCCGCCTGGGGAGTACGGTCGCAAGACTGAAACTCAAAGGAATTGACGGGGGCCCGCACAAGCGGTGgAgCATGTGGtTTAATTCgAAGCaa…	PZ394790	93.9	506	Lysinibacillus tabacifolii	k__Bacteria	p__Firmicutes	c__Bacilli	o__Caryophanales	f__ Caryophanaceae	g__Lysinibacillus	s__tabacifolii	Not tested	Not tested	Not tested	Not tested	Not tested	0	0	0
AP2.10A	11°03'03.8"N 73°55'17.6"W; Buritaca River, Sierra Nevada de Santa Marta, Colombia	Marathrum utile - AP2A	Thallus	Kings B	gGGCgTAAAGCGCACGCAgGcgGTttATTAGTCTGATGTGAAATCCCCGGGCTCaaCcTGGgACtGCATTtgAaACTGGCCaGctAgAGTCTTGTAGAggGGGGTAGAtTCCAGGTGTAGCGGTGAAATGCgTGgAGAtctGAGgAaAAgAgTgg	PZ394791	95	155	Serratia nematodiphila	k__Bacteria	p__Proteobacteria	c__Gammaproteobacteria	o__Enterobacterales	f__Yersiniaceae	g__Serratia	s__nematodiphila	Not tested	Not tested	Not tested	Not tested	Not tested	0	0	0
AP2.10B	11°03'03.8"N 73°55'17.6"W; Buritaca River, Sierra Nevada de Santa Marta, Colombia	Marathrum utile - AP2B	Thallus	Kings B													Not tested	Not tested	Not tested	Not tested	Not tested	0	0	0
AP2.11A	11°03'03.8"N 73°55'17.6"W; Buritaca River, Sierra Nevada de Santa Marta, Colombia	Marathrum utile - AP2A	Thallus	Kings B	TTAtCGGAttaCTGGGCGTAAGCGCACGCAGGCGGTCTGTCAAGTCGGATGTGAAATCCCCGGGCTCAACCTGGGAACTGCATTCGAAACTGGCAGGCTAGAGTCTTGTAGAGGGGGGTAGAATTCCAGGTGTAGCGGTGAAATGCGTAGAGATCTGGAGGAATACCGGTGGCGAAGGCGGCCCCCTGGACAAAGACTGACGCTCAGGTGCGAAAGCGTGGGGAGCAAACAGGATTAGATACCCTGGTAGTCCACGCTGTAAACGATGTCGATTTGGAGGTTGTGCCCTTGAGGCGTGGCTTCCGGAGCTAACGCGTTAAATCGACCGCCTGGGGAGTACGGCCGCAAGGTTAAAACTCAAATGAATTGACGGGGGCCCGCACAAGCGGTGGAGCATGT…	PZ394792	99.6	837	Klebsiella variicola	k__Bacteria	p__Proteobacteria	c__Gammaproteobacteria	o__Enterobacterales	f__Enterobacteriaceae	g__Klebsiella	s__quasipneumoniae	Not tested	Not tested	Not tested	Not tested	Not tested	0	0	0
AP2.11B	11°03'03.8"N 73°55'17.6"W; Buritaca River, Sierra Nevada de Santa Marta, Colombia	Marathrum utile - AP2B	Thallus	Kings B	TCGGATTACTGGGCGTAAGCGTGCGCAGGCGGTTCGGAAGtAagatGTGAAATCCCAGAgCTTAACTTTGGAACTGCATTTTTAACTACCGAGCTAGAGTGTGTCAgAGGGAGGTGGAATTCCGCGTGTAGCAGTGAAATGCGTAGATATGCGGAGGAACACCGATGGCGAAGGCAGCCTCCTGGGATAACACTGACGCTCATGCACGAAAGCGTGGGGAGCAAACAGGATTAGATACCCTGGTAGTCCACGCCCTAAACGATGTCAACTAGCTGTTGGGGCCTTCGGGCCTTGGTAGCGCAACTAACGCGTGAAGTTGACCGCCTGGGGAGTACGGTCGCAAGATTAAAACTCAAAGGAATTGACGGGGACCCgCACAAGCGGTGGATGATGTGGATT…	PZ394793	98.5	454	Achromobacter animicus	k__Bacteria	p__Proteobacteria	c__Gammaproteobacteria	o__Burkholderiales	f__Alcaligenaceae	g__Achromobacter	s__animicus	Not tested	Not tested	Not tested	Not tested	Not tested	0	0	0
AP2.12A	11°03'03.8"N 73°55'17.6"W; Buritaca River, Sierra Nevada de Santa Marta, Colombia	Marathrum utile - AP2A	Thallus	Kings B	TCGgatTaCTGGGCGTaAAGCGCACGCAGGCGGTTGatTAAGTCAGATGTGAAATCCCCGAGCTTAACTTGGGAACTGCATTTGAAACTGGTCAGCTAGAGTCTTGTAGAGGGGGGTAGAATTCCAGGTGTAGCGGTGAAATGCGTAGAGATCTGGAGGAATACCGGTGGCGAAGGCGGCCCCCTGGACAAAGACTGACGCTCAGGTGCGAAAGCGTGGGGAGCAAACAGGATTAGATACCCTGGTAGTCCACGCTGTAAACGATGTCGACTTGGAGGTTGTGCCCTTGAGGCGTGGCTTCCGGAGCTAACGCGTTAAGTCGACCGCCTGGGGAGTACGGCCGCAAGGTTAAAACTCAAATGAATTGACGGGGGCCCGCACAAGCGGTGGAGCATGTGG…	PZ394794	100	753	Hafnia alvei	k__Bacteria	p__Proteobacteria	c__Gammaproteobacteria	o__Enterobacterales	f__Hafniaceae	g__Hafnia	s__alvei	Not tested	Not tested	Not tested	Not tested	Not tested	0	2	2
AP2.12B	11°03'03.8"N 73°55'17.6"W; Buritaca River, Sierra Nevada de Santa Marta, Colombia	Marathrum utile - AP2B	Thallus	Kings B	CggAtaTTGGGCGTAAGCGCGCGCAGGTGGTTTCTTAAGTCTGATGTGAAAGCCCACGGCTCAACCGTGGAGGGTCATTGGAAACTGGGAGACTTGAGTGCAGAAGAGGAAAGTGGAATTCCATGTGTAGCGGTGAAATGCGTAGAGATATGGAGGAACACCAGTGGCGAAGGCGACTTTCTGGTCTGCAACTGACACTGAGGCGCGAAAGCGTGGGGAGCAAACAGGATTAGATACCCTGGTAGTCCACGCCGTAAACGATGAGTGCTAAGTGTTAGAGGGTTTCCGCCCTTTAGTGCTGAAGTTAACGCATTAAGCACTCCGCCTGGGGAGTACGGCCGCAAGGCTGAAACTCAAAGGAATTGACGGGGGCCCGCACAAGCGGTGGAGCATGTGGTT…	PZ394795	99	512	Bacillus rhizoplanae	k__Bacteria	p__Firmicutes	c__Bacilli	o__Bacillales	f__Bacillaceae	g__Bacillus	s__rhizoplanae	Not tested	Not tested	Not tested	Not tested	Not tested	0	0	0
AP2.13A	11°03'03.8"N 73°55'17.6"W; Buritaca River, Sierra Nevada de Santa Marta, Colombia	Marathrum utile - AP2A	Thallus	Kings B	CGGattACTGGGCGTAAGCGCACGCAGGCGGTTGatTAAGTCAGAtGTGAAATCCCCGAGCTTAACTTGGGAACTGCATTTGAAACTGGTCAGCTAGAGTCTTGTAGAGGGGGGTAGAATTCCAGGTGTAGCGGTGAAATGCGTAGAGATCTGGAGGAATACCGGTGGCGAAGGCGGCCCCCTGGACAAAGACTGACGCTCAGGTGCGAAAGCGTGGGGAGCAAACAGGATTAGATACCCTGGTAGTCCACGCTGTAAACGATGTCGACTTGGAGGTTGTGCCCTTGAGGCGTGGCTTCCGGAGCTAACGCGTTAAGTCGACCGCCTGGGGAGTACGGCCGCAAGGTTAAAACTCAAATGAATTGACGGGGGCCCGCACAAGCGGTGGAGCATGTGGTT…	PZ394796	99.2	742	Hafnia alvei	k__Bacteria	p__Proteobacteria	c__Gammaproteobacteria	o__Enterobacterales	f__Hafniaceae	g__Hafnia	s__alvei	Not tested	Not tested	Not tested	Not tested	Not tested	0	0	0
AP2.13B	11°03'03.8"N 73°55'17.6"W; Buritaca River, Sierra Nevada de Santa Marta, Colombia	Marathrum utile - AP2B	Thallus	Kings B	CttaagtCTGATGTGAAAGCCCACGGCTCAACCGtGGAGGGTCATTGGAAACTGGGAGACTTGAGTGCAGAAGAGGAAAGTGGAATTCCATGTGTAGCGGTGAAATGCGTAGAGATATGGAGGAACACCAGTGGCGAAGGCGACTTTCTGGTCTGCAACTGACACTGAGGCGCGAAAGCGTGGGGAGCAAACAGGATTAGATACCCTGGTAGTCCACGCCGTAAACGATGAGTGCTAAGTGTTAGAGGGTTTCCGCCCTTTAGTGCTGAAGTTAACGCATTAAGCACTCCGCCTGGGGAGTACGGCCGCAAGGCTGAAACTCaAAGGAATTGACGGGGGCCCGCACAAGCGGTGGAGCATGTGGTTTAATTCGAAGCAAACGCGAAAGAACCTTACCAG…	PZ394797	99.6	480	Bacillus rhizoplanae	k__Bacteria	p__Firmicutes	c__Bacilli	o__Bacillales	f__Bacillaceae	g__Bacillus	s__rhizoplanae	Not tested	Not tested	Not tested	Not tested	Not tested	0	0	0
AP2.14B	11°03'03.8"N 73°55'17.6"W; Buritaca River, Sierra Nevada de Santa Marta, Colombia	Marathrum utile - AP2B	Thallus	Kings B	TCGGATTACTGGGCGTAAGCGTGCGTAGGTGGTCGTTTAAGTCCGTTGTGAAAGCCCTGGGCTCAACCTG GGAACTGCAGTGGATACTGGGCGACTAGAGTGTGGTAGAGGGTAGCGGAATTCCTGGTGTAGCAGTGAAA TGCGTAGAGATCAGGAGGAACATCCATGGCGAAGGCAGCTACCTGGACCAACACTGACACTGAGGCACGA AAGCGTGGGGAGCAAACAGGATTAGATACCCTGGTAGTCCACGCCCTAAACGATGCGAACTGGATGTTGG GTGCAATTTGGCACGCAGTATCGAAGCTAACGCGTTAAGTTCGCCGCCTGGGGAGTACGGTCGCAAGACT GAAACTCAAAGGAATTGACGGGGGCCCGCACAAGCGGTGGAGTA…	PZ394798	99.8	794	Stenotrophomonas maltophilia	k__Bacteria	p__Proteobacteria	c__Gammaproteobacteria	o__Xanthomonadales	f__Xanthomonadaceae	g__Stenotrophomonas	s__maltophilia	Not tested	Not tested	Not tested	Not tested	Not tested	0	2	0
AP2.15B	11°03'03.8"N 73°55'17.6"W; Buritaca River, Sierra Nevada de Santa Marta, Colombia	Marathrum utile - AP2B	Thallus	Kings B	CgGAtTaTTGGGCGTAAGCGCGCGCAGGTGGTTTCTTAAGTCTGATGTGAAAGCCCACGGCTCAACCGTGGAGGGTCATTGGAAACTGGGAGACTTGAGTGCAGAAGAGGAAAGTGGAATTCCATGTGTAGCGGTGAAATGCGTAGAGATATGGAGGAACACCAGTGGCGAAGGCGACTTTCTGGTCTGTAACTGACACTGAGGCGCGAAAGCGTGGGGAGCAAACAGGATTAGATACCCTGGTAGTCCACGCCGTAAACGATGAGTGCTAAGTGTTAGAGGGTTTCCGCCCTTTAGTGCTGAAGTTAACGCATTAAGCACTCCGCCTGGGGAGTACGGCCGCAAGGCTGAAACTCAAAGGAATTGACGGGGGCCCGCACAAGCGGTGGAGCATGTGGT…	PZ394799	99.7	755	Bacillus pacificus	k__Bacteria	p__Firmicutes	c__Bacilli	o__Bacillales	f__Bacillaceae	g__Bacillus	s__pacificus	Not tested	Not tested	Not tested	Not tested	Not tested	0	0	0
AP2.16B	11°03'03.8"N 73°55'17.6"W; Buritaca River, Sierra Nevada de Santa Marta, Colombia	Marathrum utile - AP2B	Thallus	PDA	CgaatCtTTgAACgCACATTGCGCCCTCTGGTATTCCagAgGGCATGCCTGTTTGAGCGTCATTTCTCCCTCAaAcCCCCgggTGTGGTTtGGGCTGATACTCcTAGtCGCACTAgAcaTTTGCCTGAAAAGTATTGGCATGACTAGTACtGGATAGTGATGTCaACCTCTCAaTGCATTAGTTTtATCCAACTCGTTGAATGGAGTgGaGaGaTATTTCTGGTAttgTTGGTCC		92.3	235	Pichia guilliermondii	k__Fungi	p__Ascomycota	c__Saccharomycetes	o__ Saccharomycetales	f__Pichiaceae	g__Pichia	s__guilliermondii	Not tested	Not tested	Not tested	Not tested	Not tested	0	0	0
AP2.17B	11°03'03.8"N 73°55'17.6"W; Buritaca River, Sierra Nevada de Santa Marta, Colombia	Marathrum utile - AP2B	Thallus	PDA													Not tested	Not tested	Not tested	Not tested	Not tested	0	0	0
AP2.18B	11°03'03.8"N 73°55'17.6"W; Buritaca River, Sierra Nevada de Santa Marta, Colombia	Marathrum utile - AP2B	Thallus	PDA													Not tested	Not tested	Not tested	Not tested	Not tested	0	0	0
AP2.19B	11°03'03.8"N 73°55'17.6"W; Buritaca River, Sierra Nevada de Santa Marta, Colombia	Marathrum utile - AP2B	Thallus	PDA													Not tested	Not tested	Not tested	Not tested	Not tested	0	0	0
AP2.20B	11°03'03.8"N 73°55'17.6"W; Buritaca River, Sierra Nevada de Santa Marta, Colombia	Marathrum utile - AP2B	Thallus	PDA													Not tested	Not tested	Not tested	Not tested	Not tested	0	0	0
AP2.21B	11°03'03.8"N 73°55'17.6"W; Buritaca River, Sierra Nevada de Santa Marta, Colombia	Marathrum utile - AP2B	Thallus	PDA	AaACtTGagTGCTCAaAGgAGgTGGAATTCTaCGTGTAtCGGTggAAtgCGTCatATTTgTAGAACACCAgAGGCGAACGCgACtATCtGGTCtGTCaAGaCACTGAcGCGCGTATGCgTggGGAGcAAACaGGA		84.2	135	Rossellomorea arthrocnemi	k__Bacteria	p__Firmicutes	c__Bacilli	o__Bacillales	f__Bacillaceae	g__Rossellomorea	s__arthrocnemi	Not tested	Not tested	Not tested	Not tested	Not tested	0	0	0
AP2.22B	11°03'03.8"N 73°55'17.6"W; Buritaca River, Sierra Nevada de Santa Marta, Colombia	Marathrum utile - AP2B	Thallus	TSA	CGGAttATTGGGCgTaagcGCGCGCAGGCGGTCATTTAAGTCTGGTGTTTAATCCCGGGGCTCAACCCCGGATCGCACTGGAAACTGGGTGACTTGAGTGCAGAAGAGGAGAGTGGAATTCCACGTGTAGCGGTGAAATGCGTAGATATGTGGAGGAACACCAGTGGCGAAGGCGACTCTCTGGGCTGTAACTGACGCTGAGGCGCGAAAGCGTGGGGAGCAAACAGGATTAGATACCCTGGTAGTCCACGCCGTAAACGATGAGTGCTAGGTGTTAGGGGTTTCGATACCCTTGGTGCCGAAGTTAACACATTAAGCACTCCGCCTGGGGAGTACGGTCGCAAGACTGAAACTCAAAGGAATTGACGGGGACCCGCACAAGCAGTGGAGTATGTGGTT…	PZ394800	99.5	580	Paenibacillus xylanexedens	k__Bacteria	p__Firmicutes	c__Bacilli	o__Paenibacillales	f__Paenibacillaceae	g__Paenibacillus	s__xylanexedens	Not tested	Not tested	Not tested	Not tested	Not tested	0	0	0
Cal1cp1	3°53'53.8"N 76°30'12.6"W; Calima (Darien), Valle del Cauca, Colombia	Calima1	Root	TSA	GCGTAAAGCGCGCGCAGGCGGCTTTGTAAGTCTAGTGTTTAAGCTCGGAGCTCAACTCCGATTCGCACCGGAAACTGCAAGGCTTGAGTACAGAAGAGGAAAGTGGAATTCCACGTGTAGCGGTGAAATGCGTAGAGATGTGGAGGAACACCAGTGGCGAAGGCGACTTTCTGGGCTGTAACTGACGCTGAGGCGCGAAAGCGTGGGGAGCAAACAGGATTAGATACCCTGGTAGTCCACGCCGTAAACGATGAATGCTAGGTGTTAGGGGTTTCGATACCCTTGGTGCCGAAGTTAACACATTAAGCATTCCGCCTGGGGAGTACGCTCGCAAGAGTGAAACTCAAAGGAATTGACGGGGACCCGCACAAGCAGTGGAGTATGTGGTTTAATTCGAAG…	PZ394801	97.8	681	Paenibacillus montanisoli	k__Bacteria	p__Firmicutes	c__Bacilli	o__Paenibacillales	f__Paenibacillaceae	g__Paenibacillus	s__montanisoli	0	0	0	0	Not tested	0	0	0
Cal1cp2	3°53'53.8"N 76°30'12.6"W; Calima (Darien), Valle del Cauca, Colombia	Calima1	Root	TSA	GGGCGTAAAGCGCGCGCAGGCGGCTTTGTAAGTCTAGTGTTTAAGCTCGGAGCTCAACTCCGATTCGCACCGGAAACTGCAAGGCTTGAGTACAGAAGAGGAAAGTGGAATTCCACGTGTAGCGGTGAAATGCGTAGAGATGTGGAGGAACACCAGTGGCGAAGGCGACTTTCTGGGCTGTAACTGACGCTGAGGCGCGAAAGCGTGGGGAGCAAACAGGATTAGATACCCTGGTAGTCCACGCCGTAAACGATGAATGCTAGGTGTTAGGGGTTTCGATACCCTTGGTGCCGAAGTTAACACATTAAGCATTCCGCCTGGGGAGTACGCTCGCAAGAGTGAAACTCAAAGGAATTGACGGGGACCCGCACAAGCAGTGGAGTATGTGGTTTAATTCGA…	PZ394802	97.3	672	Paenibacillus montanisoli	k__Bacteria	p__Firmicutes	c__Bacilli	o__Paenibacillales	f__Paenibacillaceae	g__Paenibacillus	s__montanisoli	0	0	0	0	Not tested	0	0	0
Cal1cp3	3°53'53.8"N 76°30'12.6"W; Calima (Darien), Valle del Cauca, Colombia	Calima1	Root	TSA	TTATTGGGCGTAAAGCGCGCGCAGGCGGTTTCTTAAGTCTGATGTGAAAGCCCCCGGCTCAACCGGGGAGGGTCATTGGAAACTGGGAAACTTGAGTGCAGAAGAGGAAAGTGGAATTCCAAGTGTAGCGGTGAAATGCGTAGAGATTTGGAGGAACACCAGTGGCGAAGGCGACTTTCTGGTCTGTAACTGACGCTGAGGCGCGAAAGCGTGGGGAGCAAACAGGATTAGATACCCTGGTAGTCCACGCTGTAAACGATGAGTGCTAAGTGTTAGAGGGTTTCCGCCCTTTAGTGCTGAAGTTAACGCATTAAGCACTCCGCCTGGGGAGTACGGTCGCAAGACTGAAACTCAAAGGAATTGACGGGGGCCCGCACAAGTGGTGGAGCATGTGGTTTA…	PZ394803	100	735	Gottfriedia luciferensis	k__Bacteria	p__Firmicutes	c__Bacilli	o__Bacillales	f__Bacillaceae	g__Gottfriedia	s__luciferensis	0	1	0	0	Not tested	0	0	0
Cal1cp4	3°53'53.8"N 76°30'12.6"W; Calima (Darien), Valle del Cauca, Colombia	Calima1	Root	TSA	TGGGCGTAAAGCGCGCGCAGGCGGTCCTTTAAGTCTGATGTGAAAGCCCACGGCTCAACCGTGGAGGGTCATTGGAAACTGGGGGACTTGAGTGCAGAAGAGGAAAGCGGAATTCCACGTGTAGCGGTGAAATGCGTAGAGATGTGGAGGAACACCAGTGGCGAAGGCGGCTTTCTGGTCTGTAACTGACGCTGAGGCGCGAAAGCGTGGGGAGCAAACAGGATTAGATACCCTGGTAGTCCACGCCGTAAACGATGAGTGCTAAGTGTTAGAGGGTTTCCGCCCTTTAGTGCTGCAGCTAACGCATTAAGCACTCCGCCTGGGGAGTACGGCCGCAAGGCTGAAACTCAAAGGAATTGACGGGGGCCCGCACAAGCGGTGGAGCATGTGGTTTAATTC…	PZ394804	99.6	731	Neobacillus endophyticus	k__Bacteria	p__Firmicutes	c__Bacilli	o__Bacillales	f__Bacillaceae	g__Neobacillus	s__endophyticus	0	0	1	0	Not tested	0	0	0
Cal2cp1	3°53'53.8"N 76°30'12.6"W; Calima (Darien), Valle del Cauca, Colombia	Calima2	Root	TSA	TGGGCGTAAAGCGCGCGCAGGTGGTTTCTTAAGTCTGATGTGAAAGCCCACGGCTCAACCGTGGAGGGTCATTGGAAACTGGGAAACTTGAGTGCAGAAGAGGATAGTGGAATTCCAAGTGTAGCGGTGAAATGCGTAGAGATTTGGAGGAACACCAGTGGCGAAGGCGACTATCTGGTCTGTAACTGACACTGAGGCGCGAAAGCGTGGGGAGCAAACAGGATTAGATACCCTGGTAGTCCACGCCGTAAACGATGAGTGCTAAGTGTTGGGGGGTTTCCGCCCCTCAGTGCTGCAGCTAACGCATTAAGCACTCCGCCTGGGGAGTACGGTCGCAAGACTGAAACTCAAAGGAATTGACGGGGGCCCGCACAAGCGGTGGAGCATGTGGTTTAATTC…	PZ394805	99.7	732	Solibacillus cecembensis	k__Bacteria	p__Firmicutes	c__Bacilli	o__Bacillales	f__Planococcaceae	g__Solibacillus	s__cecembensis	0	0	0	0	Not tested	0	0	0
Cal2cp2	3°53'53.8"N 76°30'12.6"W; Calima (Darien), Valle del Cauca, Colombia	Calima2	Root	TSA	TATTGGGCGTAAAGCGCGCGCAGGTGGTTCCTTAAGTCTGATGTGAAAGCCCACGGCTCAACCGTGGAGGGTCATTGGAAACTGGGGAACTTGAGTGCAGAAGAGGAAAGTGGAATTCCAAGTGTAGCGGTGAAATGCGTAGAGATTTGGAGGAACACCAGTGGCGAAGGCGACTTTCTGGTCTGTAACTGACACTGAGGCGCGAAAGCGTGGGGAGCAAACAGGATTAGATACCCTGGTAGTCCACGCCGTAAACGATGAGTGCTAAGTGTTAGAGGGTTTCCGCCCTTTAGTGCTGCAGCTAACGCATTAAGCACTCCGCCTGGGGAGTACGGCCGCAAGGCTGAAACTCAAAGGAATTGACGGGGGCCCGCACAAGCGGTGGAGCATGTGGTTTAA…	PZ394806	99.6	661	Peribacillus frigoritolerans	k__Bacteria	p__Firmicutes	c__Bacilli	o__Bacillales	f__Bacillaceae	g__Peribacillus	s__frigoritolerans	0	0	0	0	Not tested	0	0	0
Cal2cp3	3°53'53.8"N 76°30'12.6"W; Calima (Darien), Valle del Cauca, Colombia	Calima2	Root	TSA	ATTATTGGGCGTAAAGCGCGCGCAGGTGGTTCCTTAAGTCTGATGTGAAAGCCCACGGCTCAACCGTGGAGGGTCATTGGAAACTGGGGAACTTGAGTGCAGAAGAGGAAAGTGGAATTCCAAGTGTAGCGGTGAAATGCGTAGAGATTTGGAGGAACACCAGTGGCGAAGGCGACTTTCTGGTCTGTAACTGACACTGAGGCGCGAAAGCGTGGGGAGCAAACAGGATTAGATACCCTGGTAGTCCACGCCGTAAACGATGAGTGCTAAGTGTTAGAGGGTTTCCGCCCTTTAGTGCTGCAGCTAACGCATTAAGCACTCCGCCTGGGGAGTACGGCCGCAAGGCTGAAACTCAAAGGAATTGACGGGGGCCCGCACAAGCGGTGGAGCATGTGGTTT…	PZ394807	99.4	787	Peribacillus simplex	k__Bacteria	p__Firmicutes	c__Bacilli	o__Bacillales	f__Bacillaceae	g__Peribacillus	s__simplex	2	2	2	2	Not tested	0	1	0
Cal2cp4	3°53'53.8"N 76°30'12.6"W; Calima (Darien), Valle del Cauca, Colombia	Calima2	Root	TSA	ATTATTGGGCGTAAAGCGCGCGCAGGCGGCCTTGTAAGTCTGTCGTTTAAACTCGGAGCTCAACTTCGAGTCGCGATGGAAACTGCAAAGCTTGAGTGCAGAAGAGGAAAGTGGAATTCCACGTGTAGCGGTGAAATGCGTAGAGATGTGGAGGAACACCAGTGGCGAAGGCGACTTTCTGGGCTGTAACTGACGCTGAGGCGCGAAAGCGTGGGGAGCAAACAGGATTAGATACCCTGGTAGTCCACGCCGTAAACGATGAATGCTAGGTGTTAGGGGTTTCGATACCCTTGGTGCCGAAGTTAACACATTAAGCATTCCGCCTGGGGAGTACGGTCGCAAGACTGAAACTCAAAGGAATTGACGGGGACCCGCACAAGCAGTGGAGTATGTGGTTTA…	PZ394808	98.9	779	Paenibacillus lupini	k__Bacteria	p__Firmicutes	c__Bacilli	o__Paenibacillales	f__Paenibacillaceae	g__Paenibacillus	s__lupini	2	2	2	2	Not tested	0	0	0
Cal2cp5	3°53'53.8"N 76°30'12.6"W; Calima (Darien), Valle del Cauca, Colombia	Calima2	Root	TSA	TTGGGCGTAAAGCGCGCGCAGGTGGTTCCTTAAGTCTGATGTGAAAGCCCCCGGCTCAACCGTGGAGGGTCATTGGAAACTGGGGAACTTGAGTGCAAAAAAGGAAAGTGGAATTCCAAGTGTAGCGGTGAAATGCGTAAAGATTTGGAGGAACACCAGTGGCGAAGGCGACTTTCTGGTCTGTAACTGACACTGAGGCGCGAAAGCGTGGGGAGCAAACAGGATTAGATACCCTGGTAGTCCCCGCCGTAAACGATGAGTGCTAAGTGTTAGAGGGTTTCCGCCCTTTAGTGCTGCAGCTAACGCATTAAGCACTCCGCCTGGGGAGTACGGCCGCAAGGCTGAAACTCAAAGGAATTGACGGGGGCCCGCACAAGCGGTGGAGCATGTGGTTTAATT…	PZ394809	100	511	Peribacillus frigoritolerans	k__Bacteria	p__Firmicutes	c__Bacilli	o__Bacillales	f__Bacillaceae	g__Peribacillus	s__frigoritolerans	0	0	0	0	Not tested	0	0	0
Cal2cp6	3°53'53.8"N 76°30'12.6"W; Calima (Darien), Valle del Cauca, Colombia	Calima2	Root	TSA	TTGGGCGTAAAGCGCGCGCAGGCGGCTTTGTAAGTCTGTCGTTTAAGTTCGGGGCTCAACCCCGTATCGCGATGGAAACTGCAAGGCTTGAGTACAGAAGAGGAAAGTGGAATTCCACGTGTAGCGGTGAAATGCGTAGAGATGTGGAGGAACACCAGTGGCGAAGGCGACTTTCTGGGCTGTAACTGACGCTGAGGCGCGAAAGCGTGGGGAGCAAACAGGATTAGATACCCTGGTAGTCCACGCCGTAAACGATGAATGCTAGGTGTTAGGGGTTTCAATACCCTTGGTGCCGAAGTTAACACATTAAGCATTCCGCCTGGGGAGTACGCTCGCAAGAGTGAAACTCAAAGGAATTGACGGGGACCCGCACAAGCAGTGGAGTATGTGGTTTAATTC…	PZ394810	98.4	577	Paenibacillus kobensis	k__Bacteria	p__Firmicutes	c__Bacilli	o__Paenibacillales	f__Paenibacillaceae	g__Paenibacillus	s__kobensis	0	0	0	0	Not tested	0	0	0
Cal2cp7	3°53'53.8"N 76°30'12.6"W; Calima (Darien), Valle del Cauca, Colombia	Calima2	Root	TSA	ATTGGGCGTAAAGCGCGCGCAGGCGGTTTCTTAAGTCTGATGTGAAAGCCCCCGGCTCAACCGGGGAGGGTCATTGGAAACTGGGAAACTTGAGTGCAGAAGAGGAAAGTGGAATTCCAAGTGTAGCGGTGAAATGCGTAGAGATTTGGAGGAACACCAGTGGCGAAGGCGACTTTCTGGTCTGTAACTGACGCTGAGGCGCGAAAGCGTGGGGAGCAAACAGGATTAGATACCCTGGTAGTCCACGCTGTAAACGATGAGTGCTAAGTGTTAGAGGGTTTCCGCCCTTTAGTGCTGAAGTTAACGCATTAAGCACTCCGCCTGGGGAGTACGGTCGCAAGACTGAAACTCAAAGGAATTGACGGGGGCCCGCACAAGTGGTGGAGCATGTGGTTTAAT…	PZ394811	99.5	746	Gottfriedia endophytica	k__Bacteria	p__Firmicutes	c__Bacilli	o__Bacillales	f__Bacillaceae	g__Gottfriedia	s__endophytica	1	0	0	1	Not tested	0	0	0
Cal2cp8	3°53'53.8"N 76°30'12.6"W; Calima (Darien), Valle del Cauca, Colombia	Calima2	Root	TSA	TTGGGCGTAAAGCGCGCGCAGGTGGTTCCTTAAGTCTGATGTGAAAGCCCACGGCTCAACCGTGGAGGGTCATTGGAAACTGGGGAACTTGAGTGCAGAAGAGGAAAGTGGAATTCCAAGTGTAGCGGTGAAATGCGTAGAGATTTGGAGGAACACCAGTGGCGAAGGCGACTTTCTGGTCTGTAACTGACACTGAGGCGCGAAAGCGTGGGGAGCAAACAGGATTAGATACCCTGGTAGTCCACGCCGTAAACGATGAGTGCTAAGTGTTAGAGGGTTTCCGCCCTTTAGTGCTGCAGCTAACGCATTAAGCACTCCGCCTGGGGAGTACGGCCGCAAGGCTGAAACTCAAAGGAATTGACGGGGGCCCGCACAAGCGGTGGAGCATGTGGTTTAATT…	PZ394812	100	677	Peribacillus frigoritolerans	k__Bacteria	p__Firmicutes	c__Bacilli	o__Bacillales	f__Bacillaceae	g__Peribacillus	s__frigoritolerans	0	0	0	0	Not tested	0	0	0
Cal2cp9	3°53'53.8"N 76°30'12.6"W; Calima (Darien), Valle del Cauca, Colombia	Calima2	Root	TSA	ATTGGGCGTAAAGCGCGCGCAGGCGGTTTCTTAAGTCTGATGTGAAAGCCCCCGGCTCAACCGGGGAGGGTCATTGGAAACTGGGAAACTTGAGTGCAGAAGAGGAAAGTGGAATTCCAAGTGTAGCGGTGAAATGCGTAGAGATTTGGAGGAACACCAGTGGCGAAGGCGACTTTCTGGTCTGTAACTGACGCTGAGGCGCGAAAGCGTGGGGAGCAAACAGGATTAGATACCCTGGTAGTCCACGCTGTAAACGATGAGTGCTAAGTGTTAGAGGGTTTCCGCCCTTTAGTGCTGAAGTTAACGCATTAAGCACTCCGCCTGGGGAGTACGGTCGCAAGACTGAAACTCAAAGGAATTGACGGGGGCCCGCACAAGTGGTGGAGCATGTGGTTTAAT…	PZ394813	99.6	766	Gottfriedia endophytica	k__Bacteria	p__Firmicutes	c__Bacilli	o__Bacillales	f__Bacillaceae	g__Gottfriedia	s__endophytica	0	0	0	1	Not tested	0	0	0
Cal2cp10	3°53'53.8"N 76°30'12.6"W; Calima (Darien), Valle del Cauca, Colombia	Calima2	Root	TSA	CGCAGGCGGTTTCTTAAGTCTGATGTGAAAGCCCCCGGCTCAACCGGGGAGGGTCATTGGAAACTGGGAAACTTGAGTGCAGAAGAGGAAAGTGGAATTCCAAGTGTAGCGGTGAAATGCGTAGAGATTTGGAGGAACACCAGTGGCGAAGGCGACTTTCTGGTCTGTAACTGACGCTGAGGCGCGAAAGCGTGGGGAGCAAACAGGATTAGATACCCTGGTAGTCCACGCTGTAAACGATGAGTGCTAAGTGTTAGAGGGTTTCCGCCCTTTAGTGCTGAAGTTAACGCATTAAGCACTCCGCCTGGGGAGTACGGTCGCAAGACTGAAACTCAAAGGAATTGACGGGGGCCCGCACAAGTGGTGGAGCATGTGGTTTAATTCGAAGCAACGCGAAGA…	PZ394814	99.4	642	Gottfriedia endophytica	k__Bacteria	p__Firmicutes	c__Bacilli	o__Bacillales	f__Bacillaceae	g__Gottfriedia	s__endophytica	0	1	0	0	Not tested	0	0	0
Cal2cp11	3°53'53.8"N 76°30'12.6"W; Calima (Darien), Valle del Cauca, Colombia	Calima2	Root	TSA	AGCGCGCGCAGGTGGTTTCTTAAGTCTGATGTGAAAGCCCACGGCTCAACCGTGGAGGGTCATTGGAAACTGGGAGACTTGAGTGCAGAAGAGGAAAGTGGAATTCCATGTGTAGCGGTGAAATGCGTAGAGATATGGAGGAACACCAGTGGCGAAGGCGACTTTCTGGTCTGTAACTGACACTGAGGCGCGAAAGCGTGGGGAGCAAACAGGATTAGATACCCTGGTAGTCCACGCCGTAAACGATGAGTGCTAAGTGTTAGAGGGTTTCCGCCCTTTAGTGCTGAAGTTAACGCATTAAGCACTCCGCCTGGGGAGTACGGCCGCAAGGCTGAAACTCAAAGGAATTGACGGGGGCCCGCACAAGCGGTGGAGCATGTGGTTTAATTCGAAGCAACG…	PZ394815	99.3	730	Bacillus pacificus	k__Bacteria	p__Firmicutes	c__Bacilli	o__Bacillales	f__Bacillaceae	g__Bacillus	s__pacificus	0	0	0	0	Not tested	0	0	0
Cal2cp12	3°53'53.8"N 76°30'12.6"W; Calima (Darien), Valle del Cauca, Colombia	Calima2	Root	TSA	CGCGCGCAGGCGGTTTCTTAAGTCTGATGTGAAAGCCCCCGGCTCAACCGGGGAGGGTCATTGGAAACTGGGAAACTTGAGTGCAGAAGAGGAAAGTGGAATTCCAAGTGTAGCGGTGAAATGCGTAGAGATTTGGAGGAACACCAGTGGCGAAGGCGACTTTCTGGTCTGTAACTGACGCTGAGGCGCGAAAGCGTGGGGAGCAAACAGGATTAGATACCCTGGTAGTCCACGCTGTAAACGATGAGTGCTAAGTGTTAGAGGGTTTCCGCCCTTTAGTGCTGAAGTTAACGCATTAAGCACTCCGCCTGGGGAGTACGGTCGCAAGACTGAAACTCAAAGGAATTGACGGGGGCCCGCACAAGTGGTGGAGCATGTGGTTTAATTCGAAGCAACGCG…	PZ394816	99.4	716	Gottfriedia endophytica	k__Bacteria	p__Firmicutes	c__Bacilli	o__Bacillales	f__Bacillaceae	g__Gottfriedia	s__endophytica	1	0	0	0	Not tested	0	0	0
Cal2cp13	3°53'53.8"N 76°30'12.6"W; Calima (Darien), Valle del Cauca, Colombia	Calima2	Root	TSA	AAGCGCGCGCAGGCGGTTTCTTAAGTCTGATGTGAAAGCCCCCGGCTCAACCGGGGAGGGTCATTGGAAACTGGGAAACTTGAGTGCAGAAGAGGAAAGTGGAATTCCAAGTGTAGCGGTGAAATGCGTAGAGATTTGGAGGAACACCAGTGGCGAAGGCGACTTTCTGGTCTGTAACTGACGCTGAGGCGCGAAAGCGTGGGGAGCAAACAGGATTAGATACCCTGGTAGTCCACGCTGTAAACGATGAGTGCTAAGTGTTAGAGGGTTTCCGCCCTTTAGTGCTGAAGTTAACGCATTAAGCACTCCGCCTGGGGAGTACGGTCGCAAGACTGAAACTCAAAGGAATTGACGGGGGCCCGCACAAGTGGTGGAGCATGTGGTTTAATTCGAAGCAAC…	PZ394817	99.4	755	Gottfriedia endophytica	k__Bacteria	p__Firmicutes	c__Bacilli	o__Bacillales	f__Bacillaceae	g__Gottfriedia	s__endophytica	0	0	0	0	Not tested	0	0	0
Cal2cp14	3°53'53.8"N 76°30'12.6"W; Calima (Darien), Valle del Cauca, Colombia	Calima2	Root	TSA	TGGGCGTAAAGCGCGCGCAGGCGGTCCTTTAAGTCTGATGTGAAAGCCCACGGCTCAACCGTGGAGGGTCATTGGAAACTGGGGGACTTGAGTGCAGAAGAGGAAAGCGGAATTCCACGTGTAGCGGTGAAATGCGTAGAGATGTGGAGGAACACCAGTGGCGAAGGCGGCTTTCTGGTCTGTAACTGACGCTGAGGCGCGAAAGCGTGGGGAGCAAACAGGATTAGATACCCTGGTAGTCCACGCCGTAAACGATGAGTGCTAAGTGTTAGGGGGTTTCCGCCCCTTAGTGCTGCAGCTAACGCATTAAGCACTCCGCCTGGGGAGTACGGCCGCAAGGCTGAAACTCAAAGGAATTGACGGGGGCCCGCACAAGCGGTGGAGCATGTGGTTTAATTC…	PZ394818	100	742	Neobacillus bataviensis	k__Bacteria	p__Firmicutes	c__Bacilli	o__Bacillales	f__Bacillaceae	g__Neobacillus	s__bataviensis	2	2	2	2	Not tested	0	0	0
Cal3cp1	3°53'53.8"N 76°30'12.6"W; Calima (Darien), Valle del Cauca, Colombia	Calima3	Root	TSA	GCGCGCGCAGGCGGTCCTTTAAGTCTGATGTGAAAGCCCACGGCTCAACCGTGGAGGGTCATTGGAAACTGGGGGACTTGAGTGCAGAAGAGGAGAGTGGAATTCCACGTGTAGCGGTGAAATGCGTAGAGATGTGGAGGAACACCAGTGGCGAAGGCGACTCTCTGGTCTGTAACTGACGCTGAGGCGCGAAAGCGTGGGGAGCAAACAGGATTAGATACCCTGGTAGTCCACGCCGTAAACGATGAGTGCTAAGTGTTAGAGGGTTTCCGCCCTTTAGTGCTGCAGCAAACGCATTAAGCACTCCGCCTGGGGAGTACGGCCGCAAGGCTGAAACTCAAAGGAATTGACGGGGGCCCGCACAAGCGGTGGAGCATGTGGTTTAATTCGAAGCAACGC…	PZ394819	98.9	736	Peribacillus alkalitolerans	k__Bacteria	p__Firmicutes	c__Bacilli	o__Bacillales	f__Bacillaceae	g__Peribacillus	s__alkalitolerans	0	0	0	0	Not tested	0	0	0
Cal3cp2	3°53'53.8"N 76°30'12.6"W; Calima (Darien), Valle del Cauca, Colombia	Calima3	Root	TSA	TGGGCGTAAAGCGCGCGCAGGTGGTTTCTTAAGTCTGATGTGAAAGCCCACGGCTCAACCGTGGAGGGTCATTGGAAACTGGGAGACTTGAGTGCAGAAGAGGAAAGTGGAATTCCATGTGTAGCGGTGAAATGCGTAGAGATATGGAGGAACACCAGTGGCGAAGGCGACTTTCTGGTCTGTAACTGACACTGAGGCGCGAAAGCGTGGGGAGCAAACAGGATTAGATACCCTGGTAGTCCACGCCGTAAACGATGAGTGCTAAGTGTTAGAGGGTTTCCGCCCTTTAGTGCTGAAGTTAACGCATTAAGCACTCCGCCTGGGGAGTACGGCCGCAAGGCTGAAACTCAAAGGAATTGACGGGGGCCCGCACAAGCGGTGGAGCATGTGGTTTAATTC…	PZ394820	99.7	747	Bacillus cereus	k__Bacteria	p__Firmicutes	c__Bacilli	o__Bacillales	f__Bacillaceae	g__Bacillus	s__cereus	1	0	0	0	Not tested	0	0	0
Cal4cp1	3°53'53.8"N 76°30'12.6"W; Calima (Darien), Valle del Cauca, Colombia	Calima4	Root	TSA	GGGCGTAAAGCGTGCGTAGGTGGTTGTTTAAGTCTGTTGTGAAAGCCCTGGGCTCAACCTGGGAATTGCAGTGGATACTGGGCGACTAGAGTGTGGTAGAGGGTAGTGGAATTCCTGGTGTAGCAGTGAAATGCGTAGAGATCAGGAGGAACATCCATGGCGAAGGCAGCTACCTGGACCAACACTGACACTGAGGCACGAAAGCGTGGGGAGCAAACAGGATTAGATACCCTGGTAGTCCACGCCCTAAACGATGCGAACTGGATGTTGGGTGCAATTTGGCACGCAGTATCGAAGCTAACGCGTTAAGTTCGCCGCCTGGGGAGTACGGTCGCAAGACTGAAACTCAAAGGAATTGACGGGGGCCCGCACAAGCGGTGGAGTATGTGGTTTAATTCG…	PZ394821	100	608	Stenotrophomonas rhizophila	k__Bacteria	p__Proteobacteria	c__Gammaproteobacteria	o__Xanthomonadales	f__Xanthomonadaceae	g__Stenotrophomonas	s__rhizophila	0	0	0	0	Not tested	0	0	0
Cal4cp2	3°53'53.8"N 76°30'12.6"W; Calima (Darien), Valle del Cauca, Colombia	Calima4	Root	TSA	GGCGTAAAGCGCGCGCAGGCGGTTCTTTAAGTCTGGTGTCTAAGTGCGGGGCTCAACCCCGTGATGCACTGGAAACTGGGGAACTTGAGTGCAGAAGAGGAGAGCGGAATTCCACGTGTAGCGGTGAAATGCGTAGAGATGTGGAGGAACACCAGTGGCGAAGGCGGCTCTCTGGACTGTAACTGACGCTGAGGCGCGAAAGCGTGGGGAGCAAACAGGATTAGATACCCTGGTAGTCCACGCTGTAAACGATGAGTGCTAGGTGTTGGGGGTATCATGCCCTCGGTGCCGAAGTTAACACATTAAGCACTCCGCCTGGGGAGTACGGTCGCAAGACTGAAACTCAAAGGAATTGACGGGGACCCGCACAAGCAGTGGAGTATGTGGTTTAATTCGAAG…	PZ394822	99.1	754	Cohnella lupini	k__Bacteria	p__Firmicutes	c__Bacilli	o__Paenibacillales	f__Paenibacillaceae	g__Cohnella	s__lupini	0	0	0	0	Not tested	0	0	0
Cal4cp3	3°53'53.8"N 76°30'12.6"W; Calima (Darien), Valle del Cauca, Colombia	Calima4	Root	TSA	TTGGGCGTAAAGCGCGCGCAGGCGGTTTCTTAAGTCTGATGTGAAAGCCCCCGGCTCAACCGGGGAGGGTCATTGGAAACTGGGAAACTTGAGTGCAGAAGAGGAAAGTGGAATTCCAAGTGTAGCGGTGAAATGCGTAGAGATTTGGAGGAACACCAGTGGCGAAGGCGACTTTCTGGTCTGTAACTGACGCTGAGGCGCGAAAGCGTGGGGAGCAAACAGGATTAGATACCCTGGTAGTCCACGCTGTAAACGATGAGTGCTAAGTGTTAGAGGGTTTCCGCCCTTTAGTGCTGAAGTTAACGCATTAAGCACTCCGCCTGGGGAGTACGGTCGCAAGACTGAAACTCAAAGGAATTGACGGGGGCCCGCACAAGTGGTGGAGCATGTGGTTTAATT…	PZ394823	100	525	Gottfriedia luciferensis	k__Bacteria	p__Firmicutes	c__Bacilli	o__Bacillales	f__Bacillaceae	g__Gottfriedia	s__luciferensis	0	0	1	0	Not tested	0	0	0
Cal5cp1	3°53'53.8"N 76°30'12.6"W; Calima (Darien), Valle del Cauca, Colombia	Calima5	Root	TSA	ATTTACTGGGCGTAAAGCGCACGTAGGCGGATCGATCAGTCAGGGGTGAAATCCCAGAGCTCAACTCTGGAACTGCCTTTGATACTGTCGATCTGGAGTATGGAAGAGGTGAGTGGAATTCCGAGTGTAGAGGTGAAATTCGTAGATATTCGGAGGAACACCAGTGGCGAAGGCGGCTCACTGGTCCATTACTGACGCTGAGGTGCGAAAGCGTGGGGAGCAAACAGGATTAGATACCCTGGTAGTCCACGCCGTAAACGATGAATGTTAGCCGTCGGGCAGTATACTGTTCGGTGGCGCAGCTAACGCATTAAACATTCCGCCTGGGGAGTACGGTCGCAAGATTAAAACTCAAAGGAATTGACGGGGGCCCGCACAAGCGGTGGAGCATGTGGTTTA…	PZ394824	99.3	725	Rhizobium tibeticum	k__Bacteria	p__Proteobacteria	c__Alphaproteobacteria	o__Rhizobiales	f__Rhizobiaceae	g__Rhizobium	s__tibeticum	0	0	0	0	Not tested	0	0	0
Cal5cp2	3°53'53.8"N 76°30'12.6"W; Calima (Darien), Valle del Cauca, Colombia	Calima5	Root	TSA	GATTTACTGGGCGTAAAGCGCACGTAGGCGGATCGATCAGTCAGGGGTGAAATCCCAGAGCTCAACTCTGGAACTGCCTTTGATACTGTCGATCTGGAGTATGGAAGAGGTGAGTGGAATTCCGAGTGTAGAGGTGAAATTCGTAGATATTCGGAGGAACACCAGTGGCGAAGGCGGCTCACTGGTCCATTACTGACGCTGAGGTGCGAAAGCGTGGGGAGCAAACAGGATTAGATACCCTGGTAGTCCACGCCGTAAACGATGAATGTTAGCCGTCGGGCAGTATACTGTTCGGTGGCGCAGCTAACGCATTAAACATTCCGCCTGGGGAGTACGGTCGCAAGATTAAAACTCAAAGGAATTGACGGGGGCCCGCACAAGCGGTGGAGCATGTGGTTT…	PZ394825	99	770	Rhizobium metallidurans	k__Bacteria	p__Proteobacteria	c__Alphaproteobacteria	o__Rhizobiales	f__Rhizobiaceae	g__Rhizobium	s__metallidurans	0	0	0	0	Not tested	0	0	0
Cal5cp3	3°53'53.8"N 76°30'12.6"W; Calima (Darien), Valle del Cauca, Colombia	Calima5	Root	TSA	GCGCGCAGGCGGTTTCTTAAGTCTGATGTGAAAGCCCCCGGCTCAACCGGGGAGGGTCATTGGAAACTGGGAAACTTGAGTGCAGAAGAGGAAAGTGGAATTCCAAGTGTAGCGGTGAAATGCGTAGAGATTTGGAGGAACACCAGTGGCGAAGGCGACTTTCTGGTCTGTAACTGACGCTGAGGCGCGAAAGCGTGGGGAGCAAACAGGATTAGATACCCTGGTAGTCCACGCTGTAAACGATGAGTGCTAAGTGTTAGAGGGTTTCCGCCCTTTAGTGCTGAAGTTAACGCATTAAGCACTCCGCCTGGGGAGTACGGTCGCAAGACTGAAACTCAAAGGAATTGACGGGGGCCCGCACAAGTGGTGGAGCATGTGGTTTAATTCGAAGCAACGCGA…	PZ394826	99.6	754	Gottfriedia endophytica	k__Bacteria	p__Firmicutes	c__Bacilli	o__Bacillales	f__Bacillaceae	g__Gottfriedia	s__endophytica	0	0	0	1	Not tested	0	0	0
Cal5cp4	3°53'53.8"N 76°30'12.6"W; Calima (Darien), Valle del Cauca, Colombia	Calima5	Root	TSA	CGCAGGTGGTTCCTTAAGTCTGATGTGAAAGCCCACGGCTCAACCGTGGAGGGTCATTGGAAACTGGGGAACTTGAGTGCAGAAGAGGAAAGTGGAATTCCAAGTGTAGCGGTGAAATGCGTAGAGATTTGGAGGAACACCAGTGGCGAAGGCGACTTTCTGGTCTGTAACTGACACTGAGGCGCGAAAGCGTGGGGAGCAAACAGGATTAGATACCCTGGTAGTCCACGCCGTAAACGATGAGTGCTAAGTGTTAGAGGGTTTCCGCCCTTTAGTGCTGCAGCTAACGCATTAAGCACTCCGCCTGGGGAGTACGGCCGCAAGGCTGAAACTCAAAGGAATTGACGGGGGCCCGCACAAGCGGTGGAGCATGTGGTTTAATTCGAAGCAACGCGAAGA…	PZ394827	99.6	644	Peribacillus frigoritolerans	k__Bacteria	p__Firmicutes	c__Bacilli	o__Bacillales	f__Bacillaceae	g__Peribacillus	s__frigoritolerans	0	0	0	0	Not tested	0	0	0
Cal5cp5	3°53'53.8"N 76°30'12.6"W; Calima (Darien), Valle del Cauca, Colombia	Calima5	Root	TSA	GCGTGCGTAGGTGGTTGTTTAAGTCTGTTGTGAAAGCCCTGGGCTCAACCTGGGAATTGCAGTGGATACTGGGCGACTAGAGTGTGGTAGAGGGTAGTGGAATTCCTGGTGTAGCAGTGAAATGCGTAGAGATCAGGAGGAACATCCATGGCGAAGGCAGCTACCTGGACCAACACTGACACTGAGGCACGAAAGCGTGGGGAGCAAACAGGATTAGATACCCTGGTAGTCCACGCCCTAAACGATGCGAACTGGATGTTGGGTGCAATTTGGCACGCAGTATCGAAGCTAACGCGTTAAGTTCGCCGCCTGGGGAGTACGGTCGCAAGACTGAAACTCAAAGGAATTGACGGGGGCCCGCACAAGCGGTGGAGTATGTGGTTTAATTCGATGCAACGC…	PZ394828	99.9	738	Stenotrophomonas rhizophila	k__Bacteria	p__Proteobacteria	c__Gammaproteobacteria	o__Xanthomonadales	f__Xanthomonadaceae	g__Stenotrophomonas	s__rhizophila	0	0	0	0	Not tested	0	0	1
Cal5cp6	3°53'53.8"N 76°30'12.6"W; Calima (Darien), Valle del Cauca, Colombia	Calima5	Root	TSA	ATTGGGCGTAAAGCGCGCGCAGGTGGTTCCTTAAGTCTGATGTGAAAGCCCACGGCTCAACCGTGGAGGGTCATTGGAAACTGGGGAACTTGAGTGCAGAAGAGGAAAGTGGAATTCCAAGTGTAGCGGTGAAATGCGTAGAGATTTGGAGGAACACCAGTGGCGAAGGCGACTTTCTGGTCTGTAACTGACACTGAGGCGCGAAAGCGTGGGGAGCAAACAGGATTAGATACCCTGGTAGTCCACGCCGTAAACGATGAGTGCTAAGTGTTAGAGGGTTTCCGCCCTTTAGTGCTGCAGCTAACGCATTAAGCACTCCGCCTGGGGAGTACGGCCGCAAGGCTGAAACTCAAAGGAATTGACGGGGGCCCGCACAAGCGGTGGAGCATGTGGTTTAAT…	PZ394829	99.6	800	Peribacillus simplex	k__Bacteria	p__Firmicutes	c__Bacilli	o__Bacillales	f__Bacillaceae	g__Peribacillus	s__simplex	0	0	1	0	Not tested	0	0	1
Cal5cp7	3°53'53.8"N 76°30'12.6"W; Calima (Darien), Valle del Cauca, Colombia	Calima5	Root	TSA	GGGCGTAAAGCGCGCGCAGGTGGTTTCTTAAGTCTGATGTGAAAGCCCACGGCTCAACCGTGGAGGGTCATTGGAAACTGGGAGACTTGAGTGCAGAAGAGGAAAGTGGAATTCCATGTGTAGCGGTGAAATGCGTAGAGATATGGAGGAACACCAGTGGCGAAGGCGACTTTCTGGTCTGTAACTGACACTGAGGCGCGAAAGCGTGGGGAGCAAACAGGATTAGATACCCTGGTAGTCCACGCCGTAAACGATGAGTGCTAAGTGTTAGAGGGTTTCCGCCCTTTAGTGCTGAAGTTAACGCATTAAGCACTCCGCCTGGGGAGTACGGCCGCAAGGCTGAAACTCAAAGGAATTGACGGGGGCCCGCACAAGCGGTGGAGCATGTGGTTTAATTCG…	PZ394830	99.9	768	Bacillus mycoides	k__Bacteria	p__Firmicutes	c__Bacilli	o__Bacillales	f__Bacillaceae	g__Bacillus	s__mycoides	0	0	0	0	Not tested	0	0	0
Cal6cp1	3°53'53.8"N 76°30'12.6"W; Calima (Darien), Valle del Cauca, Colombia	Calima6	Root	TSA	GCGCGCGCAGGTGGTTTCTTAAGTCTGATGTGAAAGCCCACGGCTCAACCGTGGAGGGTCATTGGAAACTGGGAGACTTGAGTGCAGAAGAGGAAAGTGGAATTCCATGTGTAGCGGTGAAATGCGTAGAGATATGGAGGAACACCAGTGGCGAAGGCGACTTTCTGGTCTGTAACTGACACTGAGGCGCGAAAGCGTGGGGAGCAAACAGGATTAGATACCCTGGTAGTCCACGCCGTAAACGATGAGTGCTAAGTGTTAGAGGGTTTCCGCCCTTTAGTGCTGAAGTTAACGCATTAAGCACTCCGCCTGGGGAGTACGGCCGCAAGGCTGAAACTCAAAGGAATTGACGGGGGCCCGCACAAGCGGTGGAGCATGTGGTTTAATTCGAAGCAACGC…	PZ394831	100	736	Bacillus mycoides	k__Bacteria	p__Firmicutes	c__Bacilli	o__Bacillales	f__Bacillaceae	g__Bacillus	s__mycoides	0	0	0	0	Not tested	0	0	0
Cal6cp2	3°53'53.8"N 76°30'12.6"W; Calima (Darien), Valle del Cauca, Colombia	Calima6	Root	TSA													1	0	0	0	Not tested	0	0	0
Cal6cp3	3°53'53.8"N 76°30'12.6"W; Calima (Darien), Valle del Cauca, Colombia	Calima6	Root	TSA	TTATTGGGCGTAAAGCGCGCGCAGGTGGTTCCTTAAGTCTGATGTGAAAGCCCACGGCTCAACCGTGGAGGGTCATTGGAAACTGGGGAACTTGAGTGCAGAAGAGGAAAGTGGAATTCCAAGTGTAGCGGTGAAATGCGTAGAGATTTGGAGGAACACCAGTGGCGAAGGCGACTTTCTGGTCTGTAACTGACACTGAGGCGCGAAAGCGTGGGGAGCAAACAGGATTAGATACCCTGGTAGTCCACGCCGTAAACGATGAGTGCTAAGTGTTAGAGGGTTTCCGCCCTTTAGTGCTGCAGCTAACGCATTAAGCACTCCGCCTGGGGAGTACGGCCGCAAGGCTGAAACTCAAAGGAATTGACGGGGGCCCGCACAAGCGGTGGAGCATGTGGTTTA…	PZ394832	99.7	752	Peribacillus muralis	k__Bacteria	p__Firmicutes	c__Bacilli	o__Bacillales	f__Bacillaceae	g__Peribacillus	s__muralis	0	0	0	0	Not tested	0	0	0
Cal6cp4	3°53'53.8"N 76°30'12.6"W; Calima (Darien), Valle del Cauca, Colombia	Calima6	Root	TSA	GTGCGTAGGTGGTTGTTTAAGTCTGTTGTGAAAGCCCTGGGCTCAACCTGGGAATTGCAGTGGATACTGGGCGACTAGAGTGTGGTAGAGGGTAGTGGAATTCCTGGTGTAGCAGTGAAATGCGTAGAGATCAGGAGGAACATCCATGGCGAAGGCAGCTACCTGGACCAACACTGACACTGAGGCACGAAAGCGTGGGGAGCAAACAGGATTAGATACCCTGGTAGTCCACGCCCTAAACGATGCGAACTGGATGTTGGGTGCAATTTGGCACGCAGTATCGAAGCTAACGCGTTAAGTTCGCCGCCTGGGGAGTACGGTCGCAAGACTGAAACTCAAAGGAATTGACGGGGGCCCGCACAAGCGGTGGAGTATGTGGTTTAATTCGATGCAACGCGA…	PZ394833	99.9	728	Stenotrophomonas rhizophila	k__Bacteria	p__Proteobacteria	c__Gammaproteobacteria	o__Xanthomonadales	f__Xanthomonadaceae	g__Stenotrophomonas	s__rhizophila	0	1	0	0	Not tested	0	0	0
Cal6cp5	3°53'53.8"N 76°30'12.6"W; Calima (Darien), Valle del Cauca, Colombia	Calima6	Root	TSA	CGCGCAGGCGGTTTCTTAAGTCTGATGTGAAAGCCCCCGGCTCAACCGGGGAGGGTCATTGGAAACTGGGAAACTTGAGTGCAGAAGAGGAAAGTGGAATTCCAAGTGTAGCGGTGAAATGCGTAGAGATTTGGAGGAACACCAGTGGCGAAGGCGACTTTCTGGTCTGTAACTGACGCTGAGGCGCGAAAGCGTGGGGAGCAAACAGGATTAGATACCCTGGTAGTCCACGCTGTAAACGATGAGTGCTAAGTGTTAGAGGGTTTCCGCCCTTTAGTGCTGAAGTTAACGCATTAAGCACTCCGCCTGGGGAGTACGGTCGCAAGACTGAAACTCAAAGGAATTGACGGGGGCCCGCACAAGTGGTGGAGCATGTGGTTTAATTCGAAGCAACGCGAA…	PZ394834	99.6	734	Gottfriedia endophytica	k__Bacteria	p__Firmicutes	c__Bacilli	o__Bacillales	f__Bacillaceae	g__Gottfriedia	s__endophytica	0	0	0	0	Not tested	0	0	0
Cal6cp6	3°53'53.8"N 76°30'12.6"W; Calima (Darien), Valle del Cauca, Colombia	Calima6	Root	TSA	TTGGGCGTAAAGCGCGCGCAGGCGGTCCTTTAAGTCTGATGTGAAAGCCCACGGCTCAACCGTGGAGGGTCATTGGAAACTGGGGGACTTGAGTGCAGAAGAGGAAAGCGGAATTCCACGTGTAGCGGTGAAATGCGTAGAGATGTGGAGGAACACCAGTGGCGAAGGCGGCTTTCTGGTCTGTAACTGACGCTGAGGCGCGAAAGCGTGGGGAGCAAACAGGATTAGATACCCTGGTAGTCCACGCCGTAAACGATGAGTGCTAAGTGTTAGGGGGTTTCCGCCCCTTAGTGCTGCAGCTAACGCATTAAGCACTCCGCCTGGGGAGTACGGCCGCAAGGCTGAAACTCAAAGGAATTGACGGGGGCCCGCACAAGCGGTGGAGCATGTGGTTTAATT…	PZ394835	100	658	Neobacillus drentensis	k__Bacteria	p__Firmicutes	c__Bacilli	o__Bacillales	f__Bacillaceae	g__Neobacillus	s__drentensis	0	0	1	0	Not tested	0	0	0
Cal6cp7	3°53'53.8"N 76°30'12.6"W; Calima (Darien), Valle del Cauca, Colombia	Calima6	Root	TSA	TGGGCGTAAAGCGCGCGCAGGTGGTTTCTTAAGTCTGATGTGAAAGCCCACGGCTCAACCGTGGAGGGTCATTGGAAACTGGGAGACTTGAGTGCAGAAGAGGAAAGTGGAATTCCATGTGTAGCGGTGAAATGCGTAGAGATATGGAGGAACACCAGTGGCGAAGGCGACTTTCTGGTCTGTAACTGACACTGAGGCGCGAAAGCGTGGGGAGCAAACAGGATTAGATACCCTGGTAGTCCACGCCGTAAACGATGAGTGCTAAGTGTTAGAGGGTTTCCGCCCTTTAGTGCTGAAGTTAACGCATTAAGCACTCCGCCTGGGGAGTACGGCCGCAAGGCTGAAACTCAAAGGAATTGACGGGGGCCCGCACAAGCGGTGGAGCATGTGGTTTAATTC…	PZ394836	99.9	757	Bacillus cereus	k__Bacteria	p__Firmicutes	c__Bacilli	o__Bacillales	f__Bacillaceae	g__Bacillus	s__cereus	0	0	0	0	Not tested	0	0	0
Cal6cp8	3°53'53.8"N 76°30'12.6"W; Calima (Darien), Valle del Cauca, Colombia	Calima6	Root	TSA	TGGGCGTAAAGCGCGCGCAGGCGGTCCTTTAAGTCTGATGTGAAAGCCCACGGCTCAACCGTGGAGGGTCATTGGAAACTGGGGGACTTGAGTGCAGAAGAGGAAAGCGGAATTCCACGTGTAGCGGTGAAATGCGTAGAGATGTGGAGGAACACCAGTGGCGAAGGCGGCTTTCTGGTCTGTAACTGACGCTGAGGCGCGAAAGCGTGGGGAGCAAACAGGATTAGATACCCTGGTAGTCCACGCCGTAAACGATGAGTGCTAAGTGTTAGGGGGTTTCCGCCCCTTAGTGCTGCAGCTAACGCATTAAGCACTCCGCCTGGGGAGTACGGCCGCAAGGCTGAAACTCAAAGGAATTGACGGGGGCCCGCACAAGCGGTGGAGCATGTGGTTTAATTC…	PZ394837	100	762	Neobacillus drentensis	k__Bacteria	p__Firmicutes	c__Bacilli	o__Bacillales	f__Bacillaceae	g__Neobacillus	s__drentensis	0	0	0	1	Not tested	0	0	0
Cal6cp9	3°53'53.8"N 76°30'12.6"W; Calima (Darien), Valle del Cauca, Colombia	Calima6	Root	TSA	CGCGCGCAGGTGGTTCCTTAAGTCTGATGTGAAAGCCCACGGCTCAACCGTGGAGGGTCATTGGAAACTGGGGAACTTGAGTGCAGAAGAGGAAAGTGGAATTCCAAGTGTAGCGGTGAAATGCGTAGAGATTTGGAGGAACACCAGTGGCGAAGGCGACTTTCTGGTCTGTAACTGACACTGAGGCGCGAAAGCGTGGGGAGCAAACAGGATTAGATACCCTGGTAGTCCACGCCGTAAACGATGAGTGCTAAGTGTTAGAGGGTTTCCGCCCTTTAGTGCTGCAGCTAACGCATTAAGCACTCCGCCTGGGGAGTACGGCCGCAAGGCTGAAACTCAAAGGAATTGACGGGGGCCCGCACAAGCGGTGGAGCATGTGGTTTAATTCGAAGCAACGCG…	PZ394838	99.6	721	Peribacillus frigoritolerans	k__Bacteria	p__Firmicutes	c__Bacilli	o__Bacillales	f__Bacillaceae	g__Peribacillus	s__frigoritolerans	0	0	0	0	Not tested	0	0	0
Cal6cp10	3°53'53.8"N 76°30'12.6"W; Calima (Darien), Valle del Cauca, Colombia	Calima6	Root	TSA													0	0	0	0	Not tested	0	0	0
Cal6cp11	3°53'53.8"N 76°30'12.6"W; Calima (Darien), Valle del Cauca, Colombia	Calima6	Root	TSA	GCGCGTAGGTGGTTTGTTAAGTTGGATGTGAAAGCCCCGGGCTCAACCTGGGAACTGCATCCAAAACTGGCAAGCTAGAGTAGGGCAGAGGGTGGTGGAATTTCCTGTGTAGCGGTGAAATGCGTAGATATAGGAAGGAACACCAGTGGCGAAGGCGACCACCTGGGCTCATACTGACACTGAGGTGCGAAAGCGTGGGGAGCAAACAGGATTAGATACCCTGGTAGTCCACGCCGTAAACGATGTCAACTAGCCGTTGGAATCCTTGAGATTTTAGTGGCGCAGCTAACGCATTAAGTTGACCGCCTGGGGAGTACGGCCGCAAGGTTAAAACTCAAATGAATTGACGGGGGCCCGCACAAGCGGTGGAGCATGTGGTTTAATTCGAAGCAACGCGAA…		98.7	628	Pseudomonas viridiflava	k__Bacteria	p__Proteobacteria	c__Gammaproteobacteria	o__Pseudomonadales	f__Pseudomonadaceae	g__Pseudomonas	s__viridiflava	1	0	0	0	Not tested	0	0	0
Cal6cp12	3°53'53.8"N 76°30'12.6"W; Calima (Darien), Valle del Cauca, Colombia	Calima6	Root	TSA	ACTGGGCGTAAAGCGCACGTAGGCGGATCGATCAGTCAGGGGTGAAATCCCAGAGCTCAACTCTGGAACTGCCTTTGATACTGTCGATCTGGAGTATGGAAGAGGTGAGTGGAATTCCGAGTGTAGAGGTGAAATTCGTAGATATTCGGAGGAACACCAGTGGCGAAGGCGGCTCACTGGTCCATTACTGACGCTGAGGTGCGAAAGCGTGGGGAGCAAACAGGATTAGATACCCTGGTAGTCCACGCCGTAAACGATGAATGTTAGCCGTCGGGCAGTATACTGTTCGGTGGCGCAGCTAACGCATTAAACATTCCGCCTGGGGAGTACGGTCGCAAGATTAAAACTCAAAGGAATTGACGGGGGCCCGCACAAGCGGTGGAGCATGTGGTTTAATTC…		99.2	662	Rhizobium tibeticum	k__Bacteria	p__Proteobacteria	c__Alphaproteobacteria	o__Rhizobiales	f__Rhizobiaceae	g__Rhizobium	s__tibeticum	0	0	0	1	Not tested	0	0	0
Cal7cp1	3°53'53.8"N 76°30'12.6"W; Calima (Darien), Valle del Cauca, Colombia	Calima7	Root	TSA	CGCGCGCAGGCGGTTTCTTAAGTCTGATGTGAAAGCCCCCGGCTCAACCGGGGAGGGTCATTGGAAACTGGGAAACTTGAGTGCAGAAGAGGAAAGTGGAATTCCAAGTGTAGCGGTGAAATGCGTAGAGATTTGGAGGAACACCAGTGGCGAAGGCGACTTTCTGGTCTGTAACTGACGCTGAGGCGCGAAAGCGTGGGGAGCAAACAGGATTAGATACCCTGGTAGTCCACGCTGTAAACGATGAGTGCTAAGTGTTAGAGGGTTTCCGCCCTTTAGTGCTGAAGTTAACGCATTAAGCACTCCGCCTGGGGAGTACGGTCGCAAGACTGAAACTCAAAGGAATTGACGGGGGCCCGCACAAGTGGTGGAGCATGTGGTTTAATTCGAAGCAACGCG…	PZ394841	99.6	690	Gottfriedia endophytica	k__Bacteria	p__Firmicutes	c__Bacilli	o__Bacillales	f__Bacillaceae	g__Gottfriedia	s__endophytica	2	2	2	2	Not tested	0	0	0
Cal7cp2	3°53'53.8"N 76°30'12.6"W; Calima (Darien), Valle del Cauca, Colombia	Calima7	Root	TSA	TATTGGGCGTAAAGCGCGCGCAGGCGGTTTCTTAAGTCTGATGTGAAAGCCCCCGGCTCAACCGGGGAGGGTCATTGGAAACTGGGAAACTTGAGTGCAGAAGAGGAAAGTGGAATTCCAAGTGTAGCGGTGAAATGCGTAGAGATTTGGAGGAACACCAGTGGCGAAGGCGACTTTCTGGTCTGTAACTGACGCTGAGGCGCGAAAGCGTGGGGAGCAAACAGGATTAGATACCCTGGTAGTCCACGCTGTAAACGATGAGTGCTAAGTGTTAGAGGGTTTCCGCCCTTTAGTGCTGAAGTTAACGCATTAAGCACTCCGCCTGGGGAGTACGGTCGCAAGACTGAAACTCAAAGGAATTGACGGGGGCCCGCACAAGTGGTGGAGCATGTGGTTTAA…	PZ394842	99.6	713	Gottfriedia endophytica	k__Bacteria	p__Firmicutes	c__Bacilli	o__Bacillales	f__Bacillaceae	g__Gottfriedia	s__endophytica	0	0	0	0	Not tested	0	0	0
Cal7cp3	3°53'53.8"N 76°30'12.6"W; Calima (Darien), Valle del Cauca, Colombia	Calima7	Root	TSA	GGCGTAAAGCGCACGTAGGCGGACATTTAAGTCAGGGGTGAAATCCCAGAGCTCAACTCTGGAACTGCCTTTGATACTGGGTGTCTTGAGTATGGAAGAGGTGAGTGGAATTCCGAGTGTAGAGGTGAAATTCGTAGATATTCGGAGGAACACCAGTGGCGAAGGCGGCTCACTGGTCCATTACTGACGCTGAGGTGCGAAAGCGTGGGGAGCAAACAGGATTAGATACCCTGGTAGTCCACGCCGTAAACGATGAATGTTAGCCGTCGGGCAGTATACTGTTCGGTGGCGCAGCTAACGCATTAAACATTCCGCCTGGGGAGTACGGTCGCAAGATTAAAACTCAAAGGAATTGACGGGGGCCCGCACAAGCGGTGGAGCATGTGGTTTAATTCGAAG…	PZ394843	99.9	749	Rhizobium mesosinicum	k__Bacteria	p__Proteobacteria	c__Alphaproteobacteria	o__Rhizobiales	f__Rhizobiaceae	g__Rhizobium	s__mesosinicum	1	0	0	0	Not tested	0	0	0
Cal7cp4	3°53'53.8"N 76°30'12.6"W; Calima (Darien), Valle del Cauca, Colombia	Calima7	Root	TSA	GCGCGCAGGCGGTTTCTTAAGTCTGATGTGAAAGCCCCCGGCTCAACCGGGGAGGGTCATTGGAAACTGGGAAACTTGAGTGCAGAAGAGGAAAGTGGAATTCCAAGTGTAGCGGTGAAATGCGTAGAGATTTGGAGGAACACCAGTGGCGAAGGCGACTTTCTGGTCTGTAACTGACGCTGAGGCGCGAAAGCGTGGGGAGCAAACAGGATTAGATACCCTGGTAGTCCACGCTGTAAACGATGAGTGCTAAGTGTTAGAGGGTTTCCGCCCTTTAGTGCTGAAGTTAACGCATTAAGCACTCCGCCTGGGGAGTACGGTCGCAAGACTGAAACTCAAAGGAATTGACGGGGGCCCGCACAAGTGGTGGAGCATGTGGTTTAATTCGAAGCAACGCGA…	PZ394844	99.6	710	Gottfriedia endophytica	k__Bacteria	p__Firmicutes	c__Bacilli	o__Bacillales	f__Bacillaceae	g__Gottfriedia	s__endophytica	0	0	0	0	Not tested	0	0	0
Cal7cp5	3°53'53.8"N 76°30'12.6"W; Calima (Darien), Valle del Cauca, Colombia	Calima7	Root	TSA	AAGCGCGCGCAGGCGGTTTCTTAAGTCTGATGTGAAAGCCCCCGGCTCAACCGGGGAGGGTCATTGGAAACTGGGAAACTTGAGTGCAGAAGAGGAAAGTGGAATTCCAAGTGTAGCGGTGAAATGCGTAGAGATTTGGAGGAACACCAGTGGCGAAGGCGACTTTCTGGTCTGTAACTGACGCTGAGGCGCGAAAGCGTGGGGAGCAAACAGGATTAGATACCCTGGTAGTCCACGCTGTAAACGATGAGTGCTAAGTGTTAGAGGGTTTCCGCCCTTTAGTGCTGAAGTTAACGCATTAAGCACTCCGCCTGGGGAGTACGGTCGCAAGACTGAAACTCAAAGGAATTGACGGGGGCCCGCACAAGTGGTGGAGCATGTGGTTTAATTCGAAGCAAC…	PZ394845	99.6	721	Gottfriedia endophytica	k__Bacteria	p__Firmicutes	c__Bacilli	o__Bacillales	f__Bacillaceae	g__Gottfriedia	s__endophytica	0	0	0	0	Not tested	0	0	0
Cal7cp6	3°53'53.8"N 76°30'12.6"W; Calima (Darien), Valle del Cauca, Colombia	Calima7	Root	TSA	GCGCGCGCAGGCGGTTTCTTAAGTCTGATGTGAAAGCCCCCGGCTCAACCGGGGAGGGTCATTGGAAACTGGGAAACTTGAGTGCAGAAGAGGAAAGTGGAATTCCAAGTGTAGCGGTGAAATGCGTAGAGATTTGGAGGAACACCAGTGGCGAAGGCGACTTTCTGGTCTGTAACTGACGCTGAGGCGCGAAAGCGTGGGGAGCAAACAGGATTAGATACCCTGGTAGTCCACGCTGTAAACGATGAGTGCTAAGTGTTAGAGGGTTTCCGCCCTTTAGTGCTGAAGTTAACGCATTAAGCACTCCGCCTGGGGAGTACGGTCGCAAGACTGAAACTCAAAGGAATTGACGGGGGCCCGCACAAGTGGTGGAGCATGTGGTTTAATTCGAAGCAACGC…	PZ394846	99.6	569	Gottfriedia endophytica	k__Bacteria	p__Firmicutes	c__Bacilli	o__Bacillales	f__Bacillaceae	g__Gottfriedia	s__endophytica	0	1	0	0	Not tested	0	0	0
Cal7cp7	3°53'53.8"N 76°30'12.6"W; Calima (Darien), Valle del Cauca, Colombia	Calima7	Root	TSA	ATTGGGCGTAAAGCGCGCGCAGGTGGTTCCTTAAGTCTGATGTGAAAGCCCACGGCTCAACCGTGGAGGGTCATTGGAAACTGGGGAACTTGAGTGCAGAAGAGGAAAGTGGAATTCCAAGTGTAGCGGTGAAATGCGTAGAGATTTGGAGGAACACCAGTGGCGAAGGCGACTTTCTGGTCTGTAACTGACACTGAGGCGCGAAAGCGTGGGGAGCAAACAGGATTAGATACCCTGGTAGTCCACGCCGTAAACGATGAGTGCTAAGTGTTAGAGGGTTTCCGCCCTTTAGTGCTGCAGCTAACGCATTAAGCACTCCGCCTGGGGAGTACGGCCGCAAGGCTGAAACTCAAAGGAATTGACGGGGGCCCGCACAAGCGGTGGAGCATGTGGTTTAAT…	PZ394847	99	709	Bacillus butanolivorans	k__Bacteria	p__Firmicutes	c__Bacilli	o__Bacillales	f__Bacillaceae	g__Bacillus	s__butanolivorans	0	0	0	0	Not tested	0	0	0
Cal7cp8	3°53'53.8"N 76°30'12.6"W; Calima (Darien), Valle del Cauca, Colombia	Calima7	Root	TSA	CTGGGCGTAAAGCGCACGTAGGCGGACATTTAAGTCAGGGGTGAAATCCCAGAGCTCAACTCTGGAACTGCCTTTGATACTGGGTGTCTTGAGTATGGAAGAGGTGAGTGGAATTCCGAGTGTAGAGGTGAAATTCGTAGATATTCGGAGGAACACCAGTGGCGAAGGCGGCTCACTGGTCCATTACTGACGCTGAGGTGCGAAAGCGTGGGGAGCAAACAGGATTAGATACCCTGGTAGTCCACGCCGTAAACGATGAATGTTAGCCGTCGGGCAGTATACTGTTCGGTGGCGCAGCTAACGCATTAAACATTCCGCCTGGGGAGTACGGTCGCAAGATTAAAACTCAAAGGAATTGACGGGGGCCCGCACAAGCGGTGGAGCATGTGGTTTAATTCG…	PZ394848	99.7	713	Rhizobium mesosinicum	k__Bacteria	p__Proteobacteria	c__Alphaproteobacteria	o__Rhizobiales	f__Rhizobiaceae	g__Rhizobium	s__mesosinicum	0	0	0	0	Not tested	0	0	0
Cal8cp1	3°53'53.8"N 76°30'12.6"W; Calima (Darien), Valle del Cauca, Colombia	Calima8	Root	TSA	ATTACTGGGCGTAAAGCGCACGTAGGCGGACATTTAAGTCAGGGGTGAAATCCCAGAGCTCAACTCTGGAACTGCCTTTGATACTGGGTGTCTTGAGTATGGAAGAGGTGAGTGGAATTCCGAGTGTAGAGGTGAAATTCGTAGATATTCGGAGGAACACCAGTGGCGAAGGCGGCTCACTGGTCCATTACTGACGCTGAGGTGCGAAAGCGTGGGGAGCAAACAGGATTAGATACCCTGGTAGTCCACGCCGTAAACGATGAATGTTAGCCGTCGGGCAGTATACTGTTCGGTGGCGCAGCTAACGCATTAAACATTCCGCCTGGGGAGTACGGTCGCAAGATTAAAACTCAAAGGAATTGACGGGGGCCCGCACAAGCGGTGGAGCATGTGGTTTAA…	PZ394849	99.9	771	Rhizobium mesosinicum	k__Bacteria	p__Proteobacteria	c__Alphaproteobacteria	o__Rhizobiales	f__Rhizobiaceae	g__Rhizobium	s__mesosinicum	0	0	1	0	Not tested	0	0	0
Cal8cp2	3°53'53.8"N 76°30'12.6"W; Calima (Darien), Valle del Cauca, Colombia	Calima8	Root	TSA	TTATTGGGCGTAAAGCGCGCGCAGGCGGTTTCTTAAGTCTGATGTGAAAGCCCCCGGCTCAACCGGGGAGGGTCATTGGAAACTGGGAAACTTGAGTGCAGAAGAGGAAAGTGGAATTCCAAGTGTAGCGGTGAAATGCGTAGAGATTTGGAGGAACACCAGTGGCGAAGGCGACTTTCTGGTCTGTAACTGACGCTGAGGCGCGAAAGCGTGGGGAGCAAACAGGATTAGATACCCTGGTAGTCCACGCTGTAAACGATGAGTGCTAAGTGTTAGAGGGTTTCCGCCCTTTAGTGCTGAAGTTAACGCATTAAGCACTCCGCCTGGGGAGTACGGTCGCAAGACTGAAACTCAAAGGAATTGACGGGGGCCCGCACAAGTGGTGGAGCATGTGGTTTA…	PZ394850	99.6	750	Gottfriedia endophytica	k__Bacteria	p__Firmicutes	c__Bacilli	o__Bacillales	f__Bacillaceae	g__Gottfriedia	s__endophytica	0	0	0	0	Not tested	0	0	0
Cal8cp3	3°53'53.8"N 76°30'12.6"W; Calima (Darien), Valle del Cauca, Colombia	Calima8	Root	TSA	TCTGGTGTTTAATCCCGGGGCTCAACCCCGGATCGCACTGGAAACTGGGTGACTTGAGTGCAGAAGAGGAGAGTGGAATTCCACGTGTAGCGGTGAAATGCGTAGATATGTGGAGGAACACCAGTGGCGAAGGCGACTCTCTGGGCTGTAACTGACGCTGAGGCGCGAAAGCGTGGGGAGCAAACAGGATTAGATACCCTGGTAGTCCACGCCGTAAACGATGAGTGCTAGGTGTTAGGGGTTTCGATACCCTTGGTGCCGAAGTTAACACATTAAGCACTCCGCCTGGGGAGTACGGTCGCAAGACTGAAACTCAAAGGAATTGACGGGGACCCGCACAAGCAGTGGAGTATGTGGTTTAATTCGAAGCAACGCGAAGAACCTTACCAGGTCTTGACA…	PZ394851	89.2	668	Paenibacillus xylanexedens	k__Bacteria	p__Firmicutes	c__Bacilli	o__Paenibacillales	f__Paenibacillaceae	g__Paenibacillus	s__xylanexedens	0	0	0	0	Not tested	0	0	0
Cal8cp4	3°53'53.8"N 76°30'12.6"W; Calima (Darien), Valle del Cauca, Colombia	Calima8	Root	TSA	GCGCACGTAGGCGGACATTTAAGTCAGGGGTGAAATCCCAGAGCTCAACTCTGGAACTGCCTTTGATACTGGGTGTCTTGAGTATGGAAGAGGTGAGTGGAATTCCGAGTGTAGAGGTGAAATTCGTAGATATTCGGAGGAACACCAGTGGCGAAGGCGGCTCACTGGTCCATTACTGACGCTGAGGTGCGAAAGCGTGGGGAGCAAACAGGATTAGATACCCTGGTAGTCCACGCCGTAAACGATGAATGTTAGCCGTCGGGCAGTATACTGTTCGGTGGCGCAGCTAACGCATTAAACATTCCGCCTGGGGAGTACGGTCGCAAGATTAAAACTCAAAGGAATTGACGGGGGCCCGCACAAGCGGTGGAGCATGTGGTTTAATTCGAAGCAACGCGC…	PZ394852	99.6	778	Rhizobium mesosinicum	k__Bacteria	p__Proteobacteria	c__Alphaproteobacteria	o__Rhizobiales	f__Rhizobiaceae	g__Rhizobium	s__mesosinicum	0	1	0	0	Not tested	0	0	0
Cal9cp1	3°53'53.8"N 76°30'12.6"W; Calima (Darien), Valle del Cauca, Colombia	Calima9	Root	TSA	CGCGCAGGTGGTTTCTTAAGTCTGATGTGAAAGCCCACGGCTCAACCGTGGAGGGTCATTGGAAACTGGGAGACTTGAGTGCAGAAGAGGAAAGTGGAATTCCATGTGTAGCGGTGAAATGCGTAGAGATATGGAGGAACACCAGTGGCGAAGGCGACTTTCTGGTCTGTAACTGACACTGAGGCGCGAAAGCGTGGGGAGCAAACAGGATTAGATACCCTGGTAGTCCACGCCGTAAACGATGAGTGCTAAGTGTTAGAGGGTTTCCGCCCTTTAGTGCTGAAGTTAACGCATTAAGCACTCCGCCTGGGGAGTACGGCCGCAAGGCTGAAACTCAAAGGAATTGACGGGGGCCCGCACAAGCGGTGGAGCATGTGGTTTAATTCGAAGCAACGCGAA…	PZ394853	99.9	758	Bacillus cereus	k__Bacteria	p__Firmicutes	c__Bacilli	o__Bacillales	f__Bacillaceae	g__Bacillus	s__cereus	0	0	0	0	Not tested	0	0	0
Cal9cp2	3°53'53.8"N 76°30'12.6"W; Calima (Darien), Valle del Cauca, Colombia	Calima9	Root	TSA	GCGCGCAGGTGGTTCCTTAAGTCTGATGTGAAAGCCCACGGCTCAACCGTGGAGGGTCATTGGAAACTGGGGAACTTGAGTGCAGAAGAGGAAAGTGGAATTCCAAGTGTAGCGGTGAAATGCGTAGAGATTTGGAGGAACACCAGTGGCGAAGGCGACTTTCTGGTCTGTAACTGACACTGAGGCGCGAAAGCGTGGGGAGCAAACAGGATTAGATACCCTGGTAGTCCACGCCGTAAACGATGAGTGCTAAGTGTTAGAGGGTTTCCGCCCTTTAGTGCTGCAGCTAACGCATTAAGCACTCCGCCTGGGGAGTACGGCCGCAAGGCTGAAACTCAAAGGAATTGACGGGGGCCCGCACAAGCGGTGGAGCATGTGGTTTAATTCGAAGCAACGCGA…	PZ394854	99.6	687	Peribacillus frigoritolerans	k__Bacteria	p__Firmicutes	c__Bacilli	o__Bacillales	f__Bacillaceae	g__Peribacillus	s__frigoritolerans	0	0	0	1	Not tested	0	0	0
Cal9cp3	3°53'53.8"N 76°30'12.6"W; Calima (Darien), Valle del Cauca, Colombia	Calima9	Root	TSA	GCGCGCAGGCGGTTTCTTAAGTCTGATGTGAAAGCCCCCGGCTCAACCGGGGAGGGTCATTGGAAACTGGGAAACTTGAGTGCAGAAGAGGAAAGTGGAATTCCAAGTGTAGCGGTGAAATGCGTAGAGATTTGGAGGAACACCAGTGGCGAAGGCGACTTTCTGGTCTGTAACTGACGCTGAGGCGCGAAAGCGTGGGGAGCAAACAGGATTAGATACCCTGGTAGTCCACGCTGTAAACGATGAGTGCTAAGTGTTAGAGGGTTTCCGCCCTTTAGTGCTGAAGTTAACGCATTAAGCACTCCGCCTGGGGAGTACGGTCGCAAGACTGAAACTCAAAGGAATTGACGGGGGCCCGCACAAGTGGTGGAGCATGTGGTTTAATTCGAAGCAACGCGA…	PZ394855	100	734	Gottfriedia luciferensis	k__Bacteria	p__Firmicutes	c__Bacilli	o__Bacillales	f__Bacillaceae	g__Gottfriedia	s__luciferensis	0	0	1	0	Not tested	0	0	0
Cal9cp4	3°53'53.8"N 76°30'12.6"W; Calima (Darien), Valle del Cauca, Colombia	Calima9	Root	TSA	CGCGCGCAGGCGGTTTCTTAAGTCTGATGTGAAAGCCCCCGGCTCAACCGGGGAGGGTCATTGGAAACTGGGAAACTTGAGTGCAGAAGAGGAAAGTGGAATTCCAAGTGTAGCGGTGAAATGCGTAGAGATTTGGAGGAACACCAGTGGCGAAGGCGACTTTCTGGTCTGTAACTGACGCTGAGGCGCGAAAGCGTGGGGAGCAAACAGGATTAGATACCCTGGTAGTCCACGCTGTAAACGATGAGTGCTAAGTGTTAGAGGGTTTCCGCCCTTTAGTGCTGAAGTTAACGCATTAAGCACTCCGCCTGGGGAGTACGGTCGCAAGACTGAAACTCAAAGGAATTGACGGGGGCCCGCACAAGTGGTGGAGCATGTGGTTTAATTCGAAGCAACGCG…	PZ394856	99.6	735	Gottfriedia endophytica	k__Bacteria	p__Firmicutes	c__Bacilli	o__Bacillales	f__Bacillaceae	g__Gottfriedia	s__endophytica	1	0	0	0	Not tested	0	0	0
Cal9cp5	3°53'53.8"N 76°30'12.6"W; Calima (Darien), Valle del Cauca, Colombia	Calima9	Root	TSA	AGCGCGCGCAGGCGGTTTCTTAAGTCTGATGTGAAAGCCCCCGGCTCAACCGGGGAGGGTCATTGGAAACTGGGAAACTTGAGTGCAGAAGAGGAAAGTGGAATTCCAAGTGTAGCGGTGAAATGCGTAGAGATTTGGAGGAACACCAGTGGCGAAGGCGACTTTCTGGTCTGTAACTGACGCTGAGGCGCGAAAGCGTGGGGAGCAAACAGGATTAGATACCCTGGTAGTCCACGCTGTAAACGATGAGTGCTAAGTGTTAGAGGGTTTCCGCCCTTTAGTGCTGAAGTTAACGCATTAAGCACTCCGCCTGGGGAGTACGGTCGCAAGACTGAAACTCAAAGGAATTGACGGGGGCCCGCACAAGTGGTGGAGCATGTGGTTTAATTCGAAGCAACG…	PZ394857	99.6	719	Gottfriedia endophytica	k__Bacteria	p__Firmicutes	c__Bacilli	o__Bacillales	f__Bacillaceae	g__Gottfriedia	s__endophytica	1	0	0	0	Not tested	0	0	0
Cal9cp6	3°53'53.8"N 76°30'12.6"W; Calima (Darien), Valle del Cauca, Colombia	Calima9	Root	TSA	GCGCGCGCAGGCGGCTTTGTAAGTTTGGTGTTTAATCTCAGAGCTCAACTCTGATTCGCATCGAAAACTGCAAGGCTTGAGTACAGAAGAGGAAAGTGGAATTCCACGTGTAGCGGTGAAATGCGTAGAGATGTGGAGGAACACCAGTGGCGAAGGCGACTTTCTGGGCTGTAACTGACGCTGAGGCGCGAAAGCGTGGGGAGCAAACAGGATTAGATACCCTGGTAGTCCACGCCGTAAACGATGAATGCTAGGTGTTAGGGGTTTCGATACCCTTGGTGCCGAAGTTAACACATTAAGCATTCCGCCTGGGGAGTACGCTCGCAAGAGTGAAACTCAAAGGAATTGACGGGGACCCGCACAAGCAGTGGAGTATGTGGTTTAATTCGAAGCAACGCG…	PZ394858	99.3	688	Paenibacillus sacheonensis	k__Bacteria	p__Firmicutes	c__Bacilli	o__Paenibacillales	f__Paenibacillaceae	g__Paenibacillus	s__sacheonensis	0	0	1	0	Not tested	0	0	0
Cal10cp1	3°53'53.8"N 76°30'12.6"W; Calima (Darien), Valle del Cauca, Colombia	Calima10	Root	TSA	GTAAAGCGCGCGCAGGCGGTCATTTAAGTCTGGTGTTTAATCCCGGGGCTCAACCCCGGATCGCACTGGAAACTGGGTGACTTGAGTGCAGAAGAGGAGAGTGGAATTCCACGTGTAGCGGTGAAATGCGTAGATATGTGGAGGAACACCAGTGGCGAAGGCGACTCTCTGGGCTGTAACTGACGCTGAGGCGCGAAAGCGTGGGGAGCAAACAGGATTAGATACCCTGGTAGTCCACGCCGTAAACGATGAGTGCTAGGTGTTAGGGGTTTCGATACCCTTGGTGCCGAAGTTAACACATTAAGCACTCCGCCTGGGGAGTACGGTCGCAAGACTGAAACTCAAAGGAATTGACGGGGACCCGCACAAGCAGTGGAGTATGTGGTTTAATTCGAAGCA…		98.7	595	Paenibacillus xylanexedens	k__Bacteria	p__Firmicutes	c__Bacilli	o__Paenibacillales	f__Paenibacillaceae	g__Paenibacillus	s__xylanexedens	1	0	0	0	Not tested	0	0	0
Cal10cp2	3°53'53.8"N 76°30'12.6"W; Calima (Darien), Valle del Cauca, Colombia	Calima10	Root	TSA	GCGCGCAGGCGGTCAATTAAGTCTGGTGTTTAATCCTGGGGCTCAACTCCGGGTCGCACTGGAAACTGGTTGACTTGAGTACAGAAGAGGAAAGTGGAATTCCACGTGTAGCGGTGAAATGCGTAGAGATGTGGAGGAACACCAGTGGCGAAGGCGACTTTCTGGGCTGTAACTGACGCTGAGGCGCGAAAGCGTGGGGAGCAAACAGGATTAGATACCCTGGTAGTCCACGCCGTAAACGATGAATGCTAGGTGTTAGGGGTTTCGATACCCTTGGTGCCGAAGTTAACACATTAAGCATTCCGCCTGGGGAGTACGGTCGCAAGACTGAAACTCAAAGGAATTGACGGGGACCCGCACAAGCAGTGGAGTATGTGGTTTAATTCGAAGCAACGCGAA…		100	642	Paenibacillus horti	k__Bacteria	p__Firmicutes	c__Bacilli	o__Paenibacillales	f__Paenibacillaceae	g__Paenibacillus	s__horti	0	0	1	0	Not tested	0	0	0
Cal10cp3	3°53'53.8"N 76°30'12.6"W; Calima (Darien), Valle del Cauca, Colombia	Calima10	Root	TSA	CGCGCAGGTGGTTTCTTAAGTCTGATGTGAAAGCCCACGGCTCAACCGTGGAGGGTCATTGGAAACTGGGAGACTTGAGTGCAGAAGAGGAAAGTGGAATTCCATGTGTAGCGGTGAAATGCGTAGAGATATGGAGGAACACCAGTGGCGAAGGCGACTTTCTGGTCTGTAACTGACACTGAGGCGCGAAAGCGTGGGGAGCAAACAGGATTAGATACCCTGGTAGTCCACGCCGTAAACGATGAGTGCTAAGTGTTAGAGGGTTTCCGCCCTTTAGTGCTGAAGTTAACGCATTAAGCACTCCGCCTGGGGAGTACGGCCGCAAGGCTGAAACTCAAAGGAATTGACGGGGGCCCGCACAAGCGGTGGAGCATGTGGTTTAATTCGAAGCAACGCGAA…		99.3	667	Bacillus cereus	k__Bacteria	p__Firmicutes	c__Bacilli	o__Bacillales	f__Bacillaceae	g__Bacillus	s__cereus	0	0	0	0	Not tested	0	0	0
Cal10cp4	3°53'53.8"N 76°30'12.6"W; Calima (Darien), Valle del Cauca, Colombia	Calima10	Root	TSA	GGCGTAAAGCGCGCGCAGGTGGTTCCTTAAGTCTGATGTGAAAGCCCCCGGCTCAACCGTGGAGGGTCATTGGAAACTGGGGAACTTGAGTGCAAAAAAGGAAAGTGGAATTCCAAGTGTAGCGGTGAAATGCGTAAAGATTTGGAGGAACACCAGTGGCGAAGGCGACTTTCTGGTCTGTAACTGACACTGAGGCGCGAAAGCGTGGGGAGCAAACAGGATTAGATACCCTGGTAGTCCCC		99.2	242	Peribacillus simplex	k__Bacteria	p__Firmicutes	c__Bacilli	o__Bacillales	f__Bacillaceae	g__Peribacillus	s__simplex	0	1	0	1	Not tested	0	0	0
Cal11cp1	3°53'53.8"N 76°30'12.6"W; Calima (Darien), Valle del Cauca, Colombia	Calima11	Root	TSA	GCGCGCAGGTGGTTCCTTAAGTCTGATGTGAAAGCCCACGGCTCAACCGTGGAGGGTCATTGGAAACTGGGGAACTTGAGTGCAGAAGAGGAAAGTGGAATTCCAAGTGTAGCGGTGAAATGCGTAGAGATTTGGAGGAACACCAGTGGCGAAGGCGACTTTCTGGTCTGTAACTGACACTGAGGCGCGAAAGCGTGGGGAGCAAACAGGATTAGATACCCTGGTAGTCCACGCCGTAAACGATGAGTGCTAAGTGTTAGAGGGTTTCCGCCCTTTAGTGCTGCAGCTAACGCATTAAGCACTCCGCCTGGGGAGTACGGCCGCAAGGCTGAAACTCAAAGGAATTGACGGGGGCCCGCACAAGCGGTGGAGCATGTGGTTTAATTCGAAGCAACGCGA…		99.9	718	Peribacillus frigoritolerans	k__Bacteria	p__Firmicutes	c__Bacilli	o__Bacillales	f__Bacillaceae	g__Peribacillus	s__frigoritolerans	0	0	0	0	Not tested	0	0	0
Cal11cp2	3°53'53.8"N 76°30'12.6"W; Calima (Darien), Valle del Cauca, Colombia	Calima11	Root	TSA	AAGCGCGCGCAGGTGGTTTCTTAAGTCTGATGTGAAAGCCCCCGGCTCAACCGGGGAGGGTCATTGGAAACTGGGAGACTTGAGTGCAGAAGAGGAAAGTGGAATTCCAAGTGTAGCGGTGAAATGCGTAGAGATTTGGAGGAACACCAGTGGCGAAAGCGACTTTCTGGTCTGTAACTGACACTGAGGCGCGAAAGCGTGGGGAGCGAACAGGATTAGATACCCTGGTAGTCCACGCCGTAAACGATGAGTGCTAAGTGTTAGAGGGTTTCCGCCCTTTAGTGCTGCAGCAAACGCATTAAGCACTCCGCCTGGGGAGTACGGCCGCAAGGCTGAAACTCAAAGGAATTGACGGGGGCCCGCACAAGCGGTGGAGCATGTGGTTTAATTCGAAGCAAC…		100	561	Cytobacillus praedii	k__Bacteria	p__Firmicutes	c__Bacilli	o__Bacillales	f__Bacillaceae 1	g__Cytobacillus	s__praedii	1	0	0	0	Not tested	0	2	2
Cal11cp3	3°53'53.8"N 76°30'12.6"W; Calima (Darien), Valle del Cauca, Colombia	Calima11	Root	TSA	GGGCGTAAAGCGCGCGTAGGTGGTTTGTTAAGTTGGATGTGAAATCCCCGGGCTCAACCTGGGAACTGCATCCAAAACTGGCAAGCTAGAGTATGGTAGAGGGTGGTGGAATTTCCTGTGTAGCGGTGAAATGCGTAGATATAGGAAGGAACACCAGTGGCGAAGGCGACCACCTGGACTGATACTGACACTGAGGTGCGAAAGCGTGGGGAGCAAACAGGATTAGATACCCTGGTAGTCCACGCCGTAAACGATGTCAACTAGCCGTTGGGAGCCTTGAGCTCTTAGTGGCGCAGCTAACGCATTAAGTTGACCGCCTGGGGAGTACGGCCGCAAGGTTAAAACTCAAATGAATTGACGGGGGCCCGCACAAGCGGTGGAGCATGTGGTTTAATTCGA…		99.7	739	Pseudomonas putida	k__Bacteria	p__Proteobacteria	c__Gammaproteobacteria	o__Pseudomonadales	f__Pseudomonadaceae	g__Pseudomonas	s__putida	0	0	0	1	Not tested	0	2	2
Cal11cp4	3°53'53.8"N 76°30'12.6"W; Calima (Darien), Valle del Cauca, Colombia	Calima11	Root	TSA	GCGCGTAGGTGGTTTGTTAAGTTGGATGTGAAATCCCCGGGCTCAACCTGGGAACTGCATCCAAAACTGGCAAGCTAGAGTATGGTAGAGGGTGGTGGAATTTCCTGTGTAGCGGTGAAATGCGTAGATATAGGAAGGAACACCAGTGGCGAAGGCGACCACCTGGACTGATACTGACACTGAGGTGCGAAAGCGTGGGGAGCAAACAGGATTAGATACCCTGGTAGTCCACGCCGTAAACGATGTCAACTAGCCGTTGGGAGCCTTGAGCTCTTAGTGGCGCAGCTAACGCATTAAGTTGACCGCCTGGGGAGTACGGCCGCAAGGTTAAAACTCAAATGAATTGACGGGGGCCCGCACAAGCGGTGGAGCATGTGGTTTAATTCGAAGCAACGCGAA…		99.2	729	Pseudomonas putida	k__Bacteria	p__Proteobacteria	c__Gammaproteobacteria	o__Pseudomonadales	f__Pseudomonadaceae	g__Pseudomonas	s__putida	1	0	0	0	Not tested	0	0	0
Cal11cp5	3°53'53.8"N 76°30'12.6"W; Calima (Darien), Valle del Cauca, Colombia	Calima11	Root	TSA	AGCGCGCGCAGGCGGTTTCTTAAGTCTGATGTGAAAGCCCCCGGCTCAACCGGGGAGGGTCATTGGAAACTGGGAAACTTGAGTGCAGAAGAGGAAAGTGGAATTCCAAGTGTAGCGGTGAAATGCGTAGAGATTTGGAGGAACACCAGTGGCGAAGGCGACTTTCTGGTCTGTAACTGACGCTGAGGCGCGAAAGCGTGGGGAGCAAACAGGATTAGATACCCTGGTAGTCCACGCTGTAAACGATGAGTGCTAAGTGTTAGAGGGTTTCCGCCCTTTAGTGCTGAAGTTAACGCATTAAGCACTCCGCCTGGGGAGTACGGTCGCAAGACTGAAACTCAAAGGAATTGACGGGGGCCCGCACAAGTGGTGGAGCATGTGGTTTAATTCGAAGCAACG…		99.6	749	Gottfriedia endophytica	k__Bacteria	p__Firmicutes	c__Bacilli	o__Bacillales	f__Bacillaceae	g__Gottfriedia	s__endophytica	0	0	1	0	Not tested	0	0	0
Cal11cp6	3°53'53.8"N 76°30'12.6"W; Calima (Darien), Valle del Cauca, Colombia	Calima11	Root	TSA	TTGGGCGTAAAGCGCGCGCAGGTGGTTTCTTAAGTCTGATGTGAAAGCCCACGGCTCAACCGTGGAGGGTCATTGGAAACTGGGAGACTTGAGTGCAGAAGAGGAAAGTGGAATTCCATGTGTAGCGGTGAAATGCGTAGAGATATGGAGGAACACCAGTGGCGAAGGCGACTTTCTGGTCTGTAACTGACACTGAGGCGCGAAAGCGTGGGGAGCAAACAGGATTAGATACCCTGGTAGTCCACGCCGTAAACGATGAGTGCTAAGTGTTAGAGGGTTTCCGCCCTTTAGTGCTGAAGTTAACGCATTAAGCACTCCGCCTGGGGAGTACGGCCGCAAGGCTGAAACTCAAAGGAATTGACGGGGGCCCGCACAAGCGGTGGAGCATGTGGTTTAATT…		99.6	775	Bacillus cereus	k__Bacteria	p__Firmicutes	c__Bacilli	o__Bacillales	f__Bacillaceae	g__Bacillus	s__cereus	0	0	0	1	Not tested	0	0	0
Cal11cp7	3°53'53.8"N 76°30'12.6"W; Calima (Darien), Valle del Cauca, Colombia	Calima11	Root	TSA	GGGCGTAAAGCGCGCGCAGGTGGTTTCTTAAGTCTGATGTGAAAGCCCACGGCTCAACCGTGGAGGGTCATTGGAAACTGGGAGACTTGAGTGCAGAAGAGGAAAGTGGAATTCCATGTGTAGCGGTGAAATGCGTAGAGATATGGAGGAACACCAGTGGCGAAGGCGACTTTCTGGTCTGTAACTGACACTGAGGCGCGAAAGCGTGGGGAGCAAACAGGATTAGATACCCTGGTAGTCCACGCCGTAAACGATGAGTGCTAAGTGTTAGAGGGTTTCCGCCCTTTAGTGCTGAAGTTAACGCATTAAGCACTCCGCCTGGGGAGTACGGCCGCAAGGCTGAAACTCAAAGGAATTGACGGGGGCCCGCACAAGCGGTGGAGCATGTGGTTTAATTCG…		99.2	725	Bacillus cereus	k__Bacteria	p__Firmicutes	c__Bacilli	o__Bacillales	f__Bacillaceae	g__Bacillus	s__cereus	1	0	0	0	Not tested	0	0	0
Cal12cp1	3°53'53.8"N 76°30'12.6"W; Calima (Darien), Valle del Cauca, Colombia	Calima12	Root	TSA	TTGGGCGTAAAGCGCGCGCAGGTGGTTTCTTAAGTCTGATGTGAAAGCCCACGGCTCAACCGTGGAGGGTCATTGGAAACTGGGAGACTTGAGTGCAGAAGAGGAAAGTGGAATTCCATGTGTAGCGGTGAAATGCGTAGAGATATGGAGGAACACCAGTGGCGAAGGCGACTTTCTGGTCTGTAACTGACACTGAGGCGCGAAAGCGTGGGGAGCAAACAGGATTAGATACCCTGGTAGTCCACGCCGTAAACGATGAGTGCTAAGTGTTAGAGGGTTTCCGCCCTTTAGTGCTGAAGTTAACGCATTAAGCACTCCGCCTGGGGAGTACGGCCGCAAGGCTGAAACTCAAAGGAATTGACGGGGGCCCGCACAAGCGGTGGAGCATGTGGTTTAATT…		99.5	749	Bacillus cereus	k__Bacteria	p__Firmicutes	c__Bacilli	o__Bacillales	f__Bacillaceae	g__Bacillus	s__cereus	0	0	0	0	Not tested	0	0	0
Cal12cp2	3°53'53.8"N 76°30'12.6"W; Calima (Darien), Valle del Cauca, Colombia	Calima12	Root	TSA	TTGGGCGTAAAGCGCGCGCAGGTGGTTTCTTAAGTCTGATGTGAAAGCCCACGGCTCAACCGTGGAGGGTCATTGGAAACTGGGAGACTTGAGTGCAGAAGAGGAAAGTGGAATTCCATGTGTAGCGGTGAAATGCGTAGAGATATGGAGGAACACCAGTGGCGAAGGCGACTTTCTGGTCTGTAACTGACACTGAGGCGCGAAAGCGTGGGGAGCAAACAGGATTAGATACCCTGGTAGTCCACGCCGTAAACGATGAGTGCTAAGTGTTAGAGGGTTTCCGCCCTTTAGTGCTGAAGTTAACGCATTAAGCACTCCGCCTGGGGAGTACGGCCGCAAGGCTGAAACTCAAAGGAATTGACGGGGGCCCGCACAAGCGGTGGAGCATGTGGTTTAATT…		99.2	781	Bacillus cereus	k__Bacteria	p__Firmicutes	c__Bacilli	o__Bacillales	f__Bacillaceae	g__Bacillus	s__cereus	0	0	0	1	Not tested	0	0	0
Cal12cp3	3°53'53.8"N 76°30'12.6"W; Calima (Darien), Valle del Cauca, Colombia	Calima12	Root	TSA	GGGCGTAAAGCGCGCGCAGGCGGTTTCTTAAGTCTGAAGGGAAAGCCCACGGCTCAACCGTGGAAGGTCATTGGAAACTGGGGAACTTGAATGGCAAAAAAAAAAGCGGAATTCCACGGGGAACGGTGAAATGGGTAAAAATGTGGAAGAACACCAGTGGCGAAAGCGGATTTTTGGTCTGGAACTGAAGCTGAAGCGCGAAAGCGTGGGGA		90.6	212	Priestia flexa	k__Bacteria	p__Firmicutes	c__Bacilli	o__Bacillales	f__Bacillaceae	g__Priestia	s__flexa	0	0	0	0	Not tested	0	0	0
Cal12cp4	3°53'53.8"N 76°30'12.6"W; Calima (Darien), Valle del Cauca, Colombia	Calima12	Root	TSA	ATTGGGCGTAAAGCGCGCGCAGGTGGTTTCTTAAGTCTGATGTGAAAGCCCACGGCTCAACCGTGGAGGGTCATTGGAAACTGGGAGACTTGAGTGCAGAAGAGGAAAGTGGAATTCCATGTGTAGCGGTGAAATGCGTAGAGATATGGAGGAACACCAGTGGCGAAGGCGACTTTCTGGTCTGTAACTGACACTGAGGCGCGAAAGCGTGGGGAGCAAACAGGATTAGATACCCTGGTAGTCCACGCCGTAAACGATGAGTGCTAAGTGTTAGAGGGTTTCCGCCCTTTAGTGCTGAAGTTAACGCATTAAGCACTCCGCCTGGGGAGTACGGCCGCAAGGCTGAAACTCAAAGGAATTGACGGGGGCCCGCACAAGCGGTGGAGCATGTGGTTTAAT…		99.9	732	Bacillus cereus	k__Bacteria	p__Firmicutes	c__Bacilli	o__Bacillales	f__Bacillaceae	g__Bacillus	s__cereus	1	0	0	0	Not tested	0	0	0
Cal12cp5	3°53'53.8"N 76°30'12.6"W; Calima (Darien), Valle del Cauca, Colombia	Calima12	Root	TSA	GCGCGCAGGTGGTTTCTTAAGTCTGATGTGAAAGCCCACGGCTCAACCGTGGAGGGTCATTGGAAACTGGGGAACTTGAGTGCAGAAGAGGAAAGTGGAATTCCAAGTGTAGCGGTGAAATGCGTAGAGATTTGGAGGAACACCAGTGGCGAAGGCGACTTTCTGGTCTGTAACTGACACTGAGGCGCGAAAGCGTGGGGAGCAAACAGGATTAGATACCCTGGTAGTCCACGCCGTAAACGATGAGTGCTAAGTGTTAGAGGGTTTCCGCCCTTTAGTGCTGCAGCTAACGCATTAAGCACTCCGCCTGGGGAGTACGGCCGCAAGGCTGAAACTCAAAGGAATTGACGGGGGCCCGCACAAGCGGTGGAGCATGTGGTTTAATTCGAAGCAACGCGA…		100	498	Peribacillus butanolivorans	k__Bacteria	p__Firmicutes	c__Bacilli	o__Bacillales	f__Bacillaceae	g__Peribacillus	s__butanolivorans	0	0	0	0	Not tested	0	0	0
Cal12cp6	3°53'53.8"N 76°30'12.6"W; Calima (Darien), Valle del Cauca, Colombia	Calima12	Root	TSA	AAGCGCGCGCAGGTGGTTTCTTAAGTCTGATGTGAAAGCCCACGGCTCAACCGTGGAGGGTCATTGGAAACTGGGAGACTTGAGTGCAGAAGAGGAAAGTGGAATTCCATGTGTAGCGGTGAAATGCGTAGAGATATGGAGGAACACCAGTGGCGAAGGCGACTTTCTGGTCTGTAACTGACACTGAGGCGCGAAAGCGTGGGGAGCAAACAGGATTAGATACCCTGGTAGTCCACGCCGTAAACGATGAGTGCTAAGTGTTAGAGGGTTTCCGCCCTTTAGTGCTGAAGTTAACGCATTAAGCACTCCGCCTGGGGAGTACGGCCGCAAGGCTGAAACTCAAAGGAATTGACGGGGGCCCGCACAAGCGGTGGAGCATGTGGTTTAATTCGAAGCAAC…		99.8	470	Bacillus paramycoides	k__Bacteria	p__Firmicutes	c__Bacilli	o__Bacillales	f__Bacillaceae	g__Bacillus	s__paramycoides	0	1	0	0	Not tested	0	1	2
Cal12cp7	3°53'53.8"N 76°30'12.6"W; Calima (Darien), Valle del Cauca, Colombia	Calima12	Root	TSA	CGCGCGCAGGCGGTTTCTTAAGTCTGATGTGAAAGCCCCCGGCTCAACCGGGGAGGGTCATTGGAAACTGGGAAACTTGAGTGCAGAAGAGGAAAGTGGAATTCCAAGTGTAGCGGTGAAATGCGTAGAGATTTGGAGGAACACCAGTGGCGAAGGCGACTTTCTGGTCTGTAACTGACGCTGAGGCGCGAAAGCGTGGGGAGCAAACAGGATTAGATACCCTGGTAGTCCACGCTGTAAACGATGAGTGCTAAGTGTTAGAGGGTTTCCGCCCTTTAGTGCTGAAGTTAACGCATTAAGCACTCCGCCTGGGGAGTACGGTCGCAAGACTGAAACTCAAAGGAATTGACGGGGGCCCGCACAAGTGGTGGAGCATGTGGTTTAATTCGAAGCAACGCG…		99.6	718	Gottfriedia endophytica	k__Bacteria	p__Firmicutes	c__Bacilli	o__Bacillales	f__Bacillaceae	g__Gottfriedia	s__endophytica	1	0	2	0	Not tested	0	0	0
Cal12cp8	3°53'53.8"N 76°30'12.6"W; Calima (Darien), Valle del Cauca, Colombia	Calima12	Root	TSA	TTGGGCGTAAAGCGCGCGCAGGTGGTTTCTTAAGTCTGATGTGAAAGCCCACGGCTCAACCGTGGAGGGTCATTGGAAACTGGGAGACTTGAGTGCAGAAGAGGAAAGTGGAATTCCATGTGTAGCGGTGAAATGCGTAGAGATATGGAGGAACACCAGTGGCGAAGGCGACTTTCTGGTCTGTAACTGACACTGAGGCGCGAAAGCGTGGGGAGCAAACAGGATTAGATACCCTGGTAGTCCACGCCGTAAACGATGAGTGCTAAGTGTTAGAGGGTTTCCGCCCTTTAGTGCTGAAGTTAACGCATTAAGCACTCCGCCTGGGGAGTACGGCCGCAAGGCTGAAACTCAAAGGAATTGACGGGGGCCCGCACAAGCGGTGGAGCATGTGGTTTAATT…		97.1	730	Bacillus cereus	k__Bacteria	p__Firmicutes	c__Bacilli	o__Bacillales	f__Bacillaceae	g__Bacillus	s__cereus	0	0	0	0	Not tested	0	0	0
Cal12cp9	3°53'53.8"N 76°30'12.6"W; Calima (Darien), Valle del Cauca, Colombia	Calima12	Root	TSA	TGGGCGTAAAGCGCGCGCAGGTGGTTTCTTAAGTCTGATGTGAAAGCCCACGGCTCAACCGTGGAGGGTCATTGGAAACTGGGAGACTTGAGTGCAGAAGAGGATAGTGGAATTCCAAGTGTAGCGGTGAAATGCGTAGAGATTTGGAGGAACACCAGTGGCGAAGGCGACTATCTGGTCTGTAACTGACACTGAGGCGCGAAAGCGTGGGGAGCAAACAGGATTAGATACCCTGGTAGTCCACGCCGTAAACGATGAGTGCTAAGTGTTGGGGGGTTTCCGCCCCTCAGTGCTGCAGCTAACGCATTAAGCACTCCGCCTGGGGAGTACGGTCGCAAGACTGAAACTCAAAGGAATTGACGGGGGCCCGCACAAGCGGTGGAGCATGTGGTTTAATTC…		99.9	713	Lysinibacillus boronitolerans	k__Bacteria	p__Firmicutes	c__Bacilli	o__Bacillales	f__Planococcaceae	g__Lysinibacillus	s__boronitolerans	0	0	0	0	Not tested	0	0	0
Son1cp1	3°51′43″N, 76°20′57″W; Sonso Lagoon natural park, Guadalajara de Buga, Valle del Cauca, Colombia	Sonso1	Root	TSA	GGGCGTAAAGCGCGCGCAGGTGGTTTCTTAAGTCTGATGTGAAAGCCCACGGCTCAACCGTGGAGGGTCATTGGAAACTGGGAGACTTGAGTGCAGAAGAGGAAAGTGGAATTCCATGTGTAGCGGTGAAATGCGTAGAGATATGGAGGAACACCAGTGGCGAAGGCGACTTTCTGGTCTGTAACTGACACTGAGGCGCGAAAGCGTGGGGAGCAAACAGGATTAGATACCCTGGTAGTCCACGCCGTAAACGATGAGTGCTAAGTGTTAGAGGGTTTCCGCCCTTTAGTGCTGAAGTTAACGCATTAAGCACTCCGCCTGGGGAGTACGGCCGCAAGGCTGAAACTCAAAGGAATTGACGGGGGCCCGCACAAGCGGTGGAGCATGTGGTTTAATTCG…	PZ394879	91.3	565	Bacillus thuringiensis	k__Bacteria	p__Firmicutes	c__Bacilli	o__Bacillales	f__Bacillaceae	g__Bacillus	s__thuringiensis	0	0	0	0	Not tested	0	0	0
Son1cp2	3°51′43″N, 76°20′57″W; Sonso Lagoon natural park, Guadalajara de Buga, Valle del Cauca, Colombia	Sonso1	Root	TSA	CGCGCAGGCGGTTCCTTAAGTCTGATGTGAAAGCCCACGGCTCAACCGTGGAGGGTCATTGGAAACTGGGGAACTTGAGTGCAGGAGAGAAAAGTGGAATTCCACGTGTAGCGGTGAAATGCGTAGAGATGTGGAGGAACACCAGTGGCGAAGGCGGCTTTTTGGCCTGTAACTGACGCTGAGGCGCGAAAGCGTGGGGAGCAAACAGGATTAGATACCCTGGTAGTCCACGCCGTAAACGATGAGTGCTAGGTGTTGGGGGGTTCCACCCTCAGTGCTGACGTTAACACATTAAGCACTCCGCCTGGGGAGTACGGCCGCAAGGCTGAAACTCAAAGGAATTGACGGGGGCCCGCACAAGCAGTGGAGCATGTGGTTTAATTCGAAGCAACGCGAAGA…	PZ394880	96.4	673	Fictibacillus rigui	k__Bacteria	p__Firmicutes	c__Bacilli	o__Bacillales	f__Bacillaceae	g__Fictibacillus	s__rigui	1	0	0	0	Not tested	0	0	0
Son1cp3	3°51′43″N, 76°20′57″W; Sonso Lagoon natural park, Guadalajara de Buga, Valle del Cauca, Colombia	Sonso1	Root	TSA	CGCGCGCAGGTGGTTTCTTAAGTCTGATGTGAAAGCCCACGGCTCAACCGTGGAGGGTCATTGGAAACTGGGGAACTTGAGTGCAGAAGAGGAAAGTGGAATTCCAAGTGTAGCGGTGAAATGCGTAGATATTTGGAGGAACACCAGTGGCGAAGGCGACTTTCTGGTCTGTAACTGACACTGAGGCGCGAAAGCGTGGGGAGCAAACAGGATTAGATACCCTGGTAGTCCACGCCGTAAACGATGAGTGCTAAGTGTTAGAGGGTTTCCGCCCTTTAGTGCTGCAGCTAACGCATTAAGCACTCCGCCTGGGGAGTACGGTCGCAAGACTGAAACTCAAAGGAATTGACGGGGGCCCGCACAAGCGGTGGAGCATGTGGTTTAATTCGAAGCAACGCG…	PZ394881	100	717	Rossellomorea marisflavi	k__Bacteria	p__Firmicutes	c__Bacilli	o__Bacillales	f__Bacillaceae	g__Rossellomorea	s__marisflavi	0	1	0	0	Not tested	0	0	0
Son1cp4	3°51′43″N, 76°20′57″W; Sonso Lagoon natural park, Guadalajara de Buga, Valle del Cauca, Colombia	Sonso1	Root	TSA	TGGGCGTAAAGCGCGCGCAGGCGGCCTTGTAAGTCTGTCGTTTAAACTCGGAGCTCAACTTCGAGTCGCGATGGAAACTGCAAAGCTTGAGTGCAGAAGAGGAAAGTGGAATTCCACGTGTAGCGGTGAAATGCGTAGAGATGTGGAGGAACACCAGTGGCGAAGGCGACTTTCTGGGCTGTAACTGACGCTGAGGCGCGAAAGCGTGGGGAGCAAACAGGATTAGATACCCTGGTAGTCCACGCCGTAAACGATGAATGCTAGGTGTTAGGGGTTTCGATACCCTTGGTGCCGAAGTTAACACATTAAGCATTCCGCCTGGGGAGTACGGTCGCAAGACTGAAACTCAAAGGAATTGACGGGGACCCGCACAAGCAGTGGAGTATGTGGTTTAATTCG…	PZ394882	98.6	725	Paenibacillus catalpae	k__Bacteria	p__Firmicutes	c__Bacilli	o__Paenibacillales	f__Paenibacillaceae	g__Paenibacillus	s__catalpae	0	0	0	0	Not tested	0	0	0
Son1cp5	3°51′43″N, 76°20′57″W; Sonso Lagoon natural park, Guadalajara de Buga, Valle del Cauca, Colombia	Sonso1	Root	TSA	TGGGCGTAAAGCGCGCGCAGGCGGTTCCTTAAGTCTGATGTGAAAGCCCACGGCTCAACCGTGGAGGGTCATTGGAAACTGGGGAACTTGAGTGCAGGAGAGAAAAGTGGAATTCCACGTGTAGCGGTGAAATGCGTAGAGATGTGGAGGAACACCAGTGGCGAAGGCGGCTTTTTGGCCTGTAACTGACGCTGAGGCGCGAAAGCGTGGGGAGCAAACAGGATTAGATACCCTGGTAGTCCACGCCGTAAACGATGAGTGCTAGGTGTTGGGGGGTTCCACCCTCAGTGCTGACGTTAACACATTAAGCACTCCGCCTGGGGAGTACGGCCGCAAGGCTGAAACTCAAAGGAATTGACGGGGGCCCGCACAAGCAGTGGAGCATGTGGTTTAATTCGA…	PZ394883	99.9	742	Fictibacillus rigui	k__Bacteria	p__Firmicutes	c__Bacilli	o__Bacillales	f__Bacillaceae	g__Fictibacillus	s__rigui	0	0	1	0	Not tested	0	0	0
Son1cp6	3°51′43″N, 76°20′57″W; Sonso Lagoon natural park, Guadalajara de Buga, Valle del Cauca, Colombia	Sonso1	Root	TSA	GGCGTAAAGCGCGCGCAGGCGGTTCCTTAAGTCTGATGTGAAAGCCCACGGCTCAACCGTGGAGGGTCATTGGAAACTGGGGAACTTGAGTGCAGGAGAGAAAAGTGGAATTCCACGTGTAGCGGTGAAATGCGTAGAGATGTGGAGGAACACCAGTGGCGAAGGCGGCTTTTTGGCCTGTAACTGACGCTGAGGCGCGAAAGCGTGGGGAGCAAACAGGATTAGATACCCTGGTAGTCCACGCCGTAAACGATGAGTGCTAGGTGTTGGGGGGTTCCACCCTCAGTGCTGACGTTAACACATTAAGCACTCCGCCTGGGGAGTACGGCCGCAAGGCTGAAACTCAAAGGAATTGACGGGGGCCCGCACAAGCAGTGGAGCATGTGGTTTAATTCGAAG…	PZ394884	99.4	682	Fictibacillus rigui	k__Bacteria	p__Firmicutes	c__Bacilli	o__Bacillales	f__Bacillaceae	g__Fictibacillus	s__rigui	0	0	0	0	Not tested	0	0	0
Son1cp7	3°51′43″N, 76°20′57″W; Sonso Lagoon natural park, Guadalajara de Buga, Valle del Cauca, Colombia	Sonso1	Root	TSA	GGGCGTAAAGCGCGCGCAGGCGGTCTCTTAAGTCTGATGTGAAAGCCCACGGCTCAACCGTGGAGGGTCATTGGAAACTGGGAGACTTGAGTGCAGGAGAGAAAAGTGGAATTCCACGTGTAGCGGTGAAATGCGTAGAGATGTGGAGGAACACCAGTGGCGAAGGCGGCTTTTTGGCCTGTAACTGACGCTGAGGCGCGAAAGCGTGGGGAGCAAACAGGATTAGATACCCTGGTAGTCCACGCCGTAAACGATGAGTGCTAGGTGTTGGGGGGTTCCACCCTCAGTGCTGAAGTTAACACATTAAGCACTCCGCCTGGGGAGTACGACCGCAAGGTTGAAACTCAAAGGAATTGACGGGGGCCCGCACAAGCAGTGGAGCATGTGGTTTAATTCGAA…	PZ394885	99.7	775	Fictibacillus nanhaiensis	k__Bacteria	p__Firmicutes	c__Bacilli	o__Bacillales	f__Bacillaceae	g__Fictibacillus	s__nanhaiensis	0	0	0	0	Not tested	0	0	0
Son1cp8	3°51′43″N, 76°20′57″W; Sonso Lagoon natural park, Guadalajara de Buga, Valle del Cauca, Colombia	Sonso1	Root	TSA	GGCGTAAAGCGCGCGCAGGTGGTTCCTTAAGTCTGATGTGAAAGCCCCCGGCTCAACCGGGGAGGGTCATTGGAAACTGGGGAACTTGAGTGCAGGAGAGGAAAGTGGAATTCCACGTGTAGCGGTGAAATGCGTAGATATGTGGAGGAACACCAGTGGCGAAGGCGACTTTCTGGCCTGTAACTGACACTGAGGCGCGAAAGCGTGGGGAGCAAACAGGATTAGATACCCTGGTAGTCCACGCCGTAAACGATGAGTGCTAAGTGTTGGGGGGTTTCCGCCCCTCAGTGCTGCAGCTAACGCATTAAGCACTCCGCCTGGGGAGTACGGCCGCAAGGCTGAAACTCAAAGGAATTGACGGGGGCCCGCACAAGCGGTGGAGCATGTGGTTTAATTCGA…	PZ394886	99.9	768	Jeotgalibacillus campisalis	k__Bacteria	p__Firmicutes	c__Bacilli	o__Bacillales	f__Planococcaceae	g__Jeotgalibacillus	s__campisalis	0	0	1	0	Not tested	0	0	0
Son1cp9	3°51′43″N, 76°20′57″W; Sonso Lagoon natural park, Guadalajara de Buga, Valle del Cauca, Colombia	Sonso1	Root	TSA	TGGGCGTAAAGCGCGCGCAGGCGGTCCTTTAAGTCTGATGTGAAAGCCCACGGCTCAACCGTGGAGGGTCATTGGAAACTGGGGGACTTGAGTGCAGAAGAGGAGAGCGGAATTCCACGTGTAGCGGTGAAATGCGTAGAGATGTGGAGGAACACCAGTGGCGAAGGCGGCTCTCTGGTCTGTAACTGACGCTGAGGCGCGAAAGCGTGGGGAGCGAACAGGATTAGATACCCTGGTAGTCCACGCCGTAAACGATGAGTGCTAAGTGTTAGAGGGTTTCCGCCCTTTAGTGCTGCAGCAAACGCATTAAGCACTCCGCCTGGGGAGTACGGTCGCAAGACTGAAACTCAAAGGAATTGACGGGGGCCCGCACAAGCGGTGGAGCATGTGGTTTAATTC…	PZ394887	99.5	776	Bacillus timonensis	k__Bacteria	p__Firmicutes	c__Bacilli	o__Bacillales	f__Bacillaceae	g__Bacillus	s__timonensis	0	0	0	0	Not tested	0	0	0
Son1cp10	3°51′43″N, 76°20′57″W; Sonso Lagoon natural park, Guadalajara de Buga, Valle del Cauca, Colombia	Sonso1	Root	TSA	GCGCGCAGGTGGTTCCTTAAGTCTGATGTGAAAGCCCACGGCTCAACCGTGGAGGGTCATTGGAAACTGGGGAACTTGAGTGCAGAAGAGGAAAGTGGAATTCCAAGTGTAGCGGTGAAATGCGTAGAGATTTGGAGGAACACCAGTGGCGAAGGCGACTTTCTGGTCTGTAACTGACACTGAGGCGCGAAAGCGTGGGGAGCAAACAGGATTAGATACCCTGGTAGTCCACGCCGTAAACGATGAGTGCTAAGTGTTAGAGGGTTTCCGCCCTTTAGTGCTGCAGCTAACGCATTAAGCACTCCGCCTGGGGAGTACGGCCGCAAGGCTGAAACTCAAAGGAATTGACGGGGGCCCGCACAAGCGGTGGAGCATGTGGTTTAATTCGAAGCAACGCGA…		100	622	Peribacillus frigoritolerans	k__Bacteria	p__Firmicutes	c__Bacilli	o__Bacillales	f__Bacillaceae	g__Peribacillus	s__frigoritolerans	0	0	0	1	Not tested	0	0	0
Son2cp1	3°51′43″N, 76°20′57″W; Sonso Lagoon natural park, Guadalajara de Buga, Valle del Cauca, Colombia	Sonso2	Root	TSA	TTGGGCGTAAAGCGCGCGCAGGCGGTCTCTTAAGTCTGATGTGAAAGCCCACGGCTCAACCGTGGAGGGTCATTGGAAACTGGGAGACTTGAGTGCAGGAGAGAAAAGTGGAATTCCACGTGTAGCGGTGAAATGCGTAGAGATGTGGAGGAACACCAGTGGCGAAGGCGGCTTTTTGGCCTGTAACTGACGCTGAGGCGCGAAAGCGTGGGGAGCAAACAGGATTAGATACCCTGGTAGTCCACGCCGTAAACGATGAGTGCTAGGTGTTGGGGGGTTCCACCCTCAGTGCTGAAGTTAACACATTAAGCACTCCGCCTGGGGAGTACGACCGCAAGGTTGAAACTCAAAGGAATTGACGGGGGCCCGCACAAGCAGTGGAGCATGTGGTTTAATTCG…	PZ394889	99.3	715	Fictibacillus nanhaiensis	k__Bacteria	p__Firmicutes	c__Bacilli	o__Bacillales	f__Bacillaceae	g__Fictibacillus	s__nanhaiensis	0	0	0	0	Not tested	0	0	0
Son2cp2	3°51′43″N, 76°20′57″W; Sonso Lagoon natural park, Guadalajara de Buga, Valle del Cauca, Colombia	Sonso2	Root	TSA	ATTGGGCGTAAAGCGCGCGCAGGCGGCTATTTAAGTCTGGTGTTTAAACCTCGGGCTCAACCTGGGGTCGCACTGGAAACTGGATGGCTTGAGTGCAGAAGAGGAAAGTGGAATTCCATGTGTAGCGGTGAAATGCGTAGATATATGGAGGAACACCAGTGGCGAAGGCGACTTTCTGGGCTGTAACTGACGCTGAGGCGCGAAAGCGTGGGGAGCAAACAGGATTAGATACCCTGGTAGTCCACGCCGTAAACGATGAGTGCTAGGTGTTAGGGGTTTCGATACCCTTGGTGCCGAAGTTAACACAGTAAGCACTCCGCCTGGGGAGTACGGTCGCAAGACTGAAACTCAAAGGAATTGACGGGGACCCGCACAAGCAGTGGAGTATGTGGTTTAATT…	PZ394890	97.7	680	Paenibacillus abekawaensis	k__Bacteria	p__Firmicutes	c__Bacilli	o__Paenibacillales	f__Paenibacillaceae	g__Paenibacillus	s__abekawaensis	1	0	0	0	Not tested	0	0	0
Son2cp3	3°51′43″N, 76°20′57″W; Sonso Lagoon natural park, Guadalajara de Buga, Valle del Cauca, Colombia	Sonso2	Root	TSA	AGGCGGTCTGTCGCGTCTGCTGTGAAAACCCGAGGCTCAACCTCGGGCCTGCAGTGGGTACGGGCAGACTAGAGTGCGGTAGGGGAGAATGGAATTCCTGGTGTAGCGGTGGAATGCGCAGATATCAGGAGGAACACCGATGGCGAAGGCAGTTCTCTGGGCCGTAACTGACGCTGAGGAGCGAAAGCGTGGGGAGCGAACAGGATTAGATACCCTGGTAGTCCACGCCGTAAACGTTGGGCGCTAGATGTGGGGACCATTCCACGGTTTCCGTGTCGCAGCTAACGCATTAAGCGCCCCGCCTGGGGAGTACGGCCGCAAGGCTAAAACTCAAAGGAATTGACGGGGGCCCGCACAAGCGGCGGAGCATGCGGATTAATTCGATGCAACGCGAAGAAC…	PZ394891	100	662	Leifsonia virtsii	k__Bacteria	p__Actinobacteriota	c__Actinobacteria	o__Micrococcales	f__Microbacteriaceae	g__Leifsonia	s__virtsii	0	0	0	0	Not tested	0	0	0
Son2cp4	3°51′43″N, 76°20′57″W; Sonso Lagoon natural park, Guadalajara de Buga, Valle del Cauca, Colombia	Sonso2	Root	TSA	CGCGCGTAGGCGGTTTTTTAAGTCTGATGTGAAAGCCCACGGCTCAACCGTGGAGGGTCATTGGAAACTGGAAAACTTGAGTGCAGAAGAGGAAAGTGGAATTCCATGTGTAGCGGTGAAATGCGCAGAGATATGGAGGAACACCAGTGGCGAAGGCGACTTTCTGGTCTGTAACTGACGCTGATGTGCGAAAGCGTGGGGATCAAACAGGATTAGATACCCTGGTAGTCCACGCCGTAAACGATGAGTGCTAAGTGTTAGGGGGTTTCCGCCCCTTAGTGCTGCAGCTAACGCATTAAGCACTCCGCCTGGGGAGTACGACCGCAAGGTTGAAACTCAAAGGAATTGACGGGGACCCGCACAAGCGGTGGAGCATGTGGTTTAATTCGAAGCAACGCG…	PZ394892	100	757	Staphylococcus warneri	k__Bacteria	p__Firmicutes	c__Bacilli	o__Staphylococcales	f__Staphylococcaceae	g__Staphylococcus	s__warneri	0	0	0	0	Not tested	0	0	0
Son2cp5	3°51′43″N, 76°20′57″W; Sonso Lagoon natural park, Guadalajara de Buga, Valle del Cauca, Colombia	Sonso2	Root	TSA	GGGCGTAAAGCGCGCGCAGGTGGTTCCTTAAGTCTGATGTGAAAGCCCCCGGCTCAACCGGGGAGGGTCATTGGAAACTGGGGAACTTGAGTGCAGGAGAGGAAAGTGGAATTCCACGTGTAGCGGTGAAATGCGTAGATATGTGGAGGAACACCAGTGGCGAAGGCGACTTTCTGGCCTGTAACTGACACTGAGGCGCGAAAGCGTGGGGAGCAAACAGGATTAGATACCCTGGTAGTCCACGCCGTAAACGATGAGTGCTAAGTGTTGGGGGGTTTCCGCCCCTCAGTGCTGCAGCTAACGCATTAAGCACTCCGCCTGGGGAGTACGGCCGCAAGGCTGAAACTCAAAGGAATTGACGGGGGCCCGCACAAGCGGTGGAGCATGTGGTTTAATTCG…	PZ394893	99.1	759	Jeotgalibacillus campisalis	k__Bacteria	p__Firmicutes	c__Bacilli	o__Bacillales	f__Planococcaceae	g__Jeotgalibacillus	s__campisalis	1	0	0	0	Not tested	0	0	0
Son3cp1	3°51′43″N, 76°20′57″W; Sonso Lagoon natural park, Guadalajara de Buga, Valle del Cauca, Colombia	Sonso3	Root	TSA	CGCGCGCAGGTGGTTTCTTAAGTCTGATGTGAAAGCCCACGGCTCAACCGTGGAGGGTCATTGGAAACTGGGAGACTTGAGTGCAGAAGAGGAAAGTGGAATTCCATGTGTAGCGGTGAAATGCGTAGAGATATGGAGGAACACCAGTGGCGAAGGCGACTTTCTGGTCTGTAACTGACACTGAGGCGCGAAAGCGTGGGGAGCAAACAGGATTAGATACCCTGGTAGTCCACGCCGTAAACGATGAGTGCTAAGTGTTAGAGGGTTTCCGCCCTTTAGTGCTGAAGTTAACGCATTAAGCACTCCGCCTGGGGAGTACGGCCGCAAGGCTGAAACTCAAAGGAATTGACGGGGGCCCGCACAAGCGGTGGAGCATGTGGTTTAATTCGAAGCAACGCG…	PZ394894	99.7	752	Bacillus thuringiensis	k__Bacteria	p__Firmicutes	c__Bacilli	o__Bacillales	f__Bacillaceae	g__Bacillus	s__thuringiensis	0	0	1	0	Not tested	0	0	0
Son3cp2	3°51′43″N, 76°20′57″W; Sonso Lagoon natural park, Guadalajara de Buga, Valle del Cauca, Colombia	Sonso3	Root	TSA	GCGCAGGTGGTTTCTTAAGTCTGATGTGAAAGCCCACGGCTCAACCGTGGAGGGTCATTGGAAACTGGGGAACTTGAGTGCAGAAGAGGAAAGTGGAATTCCAAGTGTAGCGGTGAAATGCGTAGATATTTGGAGGAACACCAGTGGCGAAGGCGACTTTCTGGTCTGTAACTGACACTGAGGCGCGAAAGCGTGGGGAGCAAACAGGATTAGATACCCTGGTAGTCCACGCCGTAAACGATGAGTGCTAAGTGTTAGAGGGTTTCCGCCCTTTAGTGCTGCAGCTAACGCATTAAGCACTCCGCCTGGGGAGTACGGTCGCAAGACTGAAACTCAAAGGAATTGACGGGGGCCCGCACAAGCGGTGGAGCATGTGGTTTAATTCGAAGCAACGCGAAG…	PZ394895	100	696	Rossellomorea marisflavi	k__Bacteria	p__Firmicutes	c__Bacilli	o__Bacillales	f__Bacillaceae	g__Rossellomorea	s__marisflavi	0	0	0	0	Not tested	0	0	0
Son3cp3	3°51′43″N, 76°20′57″W; Sonso Lagoon natural park, Guadalajara de Buga, Valle del Cauca, Colombia	Sonso3	Root	TSA	TTGGGCGTAAAGCGCGCGCAGGCGGTTCCTTAAGTCTGATGTGAAAGCCCACGGCTCAACCGTGGAGGGTCATTGGAAACTGGGGAACTTGAGTGCAGGAGAGAAAAGTGGAATTCCACGTGTAGCGGTGAAATGCGTAGAGATGTGGAGGAACACCAGTGGCGAAGGCGGCTTTTTGGCCTGTAACTGACGCTGAGGCGCGAAAGCGTGGGGAGCAAACAGGATTAGATACCCTGGTAGTCCACGCCGTAAACGATGAGTGCTAGGTGTTGGGGGGTTCCACCCTCAGTGCTGACGTTAACACATTAAGCACTCCGCCTGGGGAGTACGGCCGCAAGGCTGAAACTCAAAGGAATTGACGGGGGCCCGCACAAGCAGTGGAGCATGTGGTTTAATTCG…	PZ394896	99.6	761	Fictibacillus rigui	k__Bacteria	p__Firmicutes	c__Bacilli	o__Bacillales	f__Bacillaceae	g__Fictibacillus	s__rigui	0	0	0	0	Not tested	0	0	0
Son3cp4	3°51′43″N, 76°20′57″W; Sonso Lagoon natural park, Guadalajara de Buga, Valle del Cauca, Colombia	Sonso3	Root	TSA	CGCGCGCAGGCGGTTTCTTAAGTCTGATGTGAAAGCCCCCGGCTCAACCGGGGAGGGTCATTGGAAACTGGGAAACTTGAGTGCAGAAGAGGAGAGTGGAATTCCACGTGTAGCGGTGAAATGCGTAGAGATGTGGAGGAACACCAGTGGCGAAGGCGACTCTCTGGTCTGTAACTGACGCTGAGGCGCGAAAGCGTGGGGAGCGAACAGGATTAGATACCCTGGTAGTCCACGCCGTAAACGATGAGTGCTAAGTGTTAGAGGGTTTCCGCCCTTTAGTGCTGCAGCTAACGCATTAAGCACTCCGCCTGGGGAGTACGGTCGCAAGACTGAAACTCAAAGGAATTGACGGGGGCCCGCACAAGCGGTGGAGCATGTGGTTTAATTCGAAGCAACGCG…	PZ394897	99.7	748	Bacillus indicus	k__Bacteria	p__Firmicutes	c__Bacilli	o__Bacillales	f__Bacillaceae	g__Bacillus	s__indicus	0	0	0	1	Not tested	0	0	0
Son3cp5	3°51′43″N, 76°20′57″W; Sonso Lagoon natural park, Guadalajara de Buga, Valle del Cauca, Colombia	Sonso3	Root	TSA	TTGGGCGTAAGCGCGCGCAGGCGGTTTCTTAAGTCTGATGTGAAAGCCCACGGCTCAACCGTGGAGGGTCATTGGAAACTGGGGAACTTGAGTGCAGAAGAGAAAAGCGGAATTCCACGTGTAGCGGTGAAATGCGTAGAGATGTGGAGGAACACCAGTGGCGAAGGCGGCTTTTTGGTCTGTAACTGACGCTGAGGCGCGAAAGCGTGGGGAGCAAACAGGATTATATACCCTGGTAGTCCACGCCGTAAACGATGAGTGCTAAGTGTTAGAGGGTTTCCGCCCTTTAGTGCTGCAGCTAACGCATTAAGCACTCCGCCTGGGGAGTACGGTCGCAAGACTGAAACTCAAAGGAATTGACGGGGGCCCGCACAAGCGGTGGAGCATGTGGTTTAATTC…	PZ394898	100	770	Priestia flexa	k__Bacteria	p__Firmicutes	c__Bacilli	o__Bacillales	f__Bacillaceae	g__Priestia	s__flexa	0	0	0	0	Not tested	0	0	0
Son3cp6	3°51′43″N, 76°20′57″W; Sonso Lagoon natural park, Guadalajara de Buga, Valle del Cauca, Colombia	Sonso3	Root	TSA	TATTGGGCGTAAAGCGCGCGCAGGTGGTTCCTTAAGTCTGATGTGAAAGCCCACGGCTCAACCGTGGAGGGTCATTGGAAACTGGGGAACTTGAGTGCAGAAGAGGAAAGTGGAATTCCAAGTGTAGCGGTGAAATGCGTAGAGATTTGGAGGAACACCAGTGGCGAAGGCGACTTTCTGGTCTGTAACTGACACTGAGGCGCGAAAGCGTGGGGAGCAAACAGGATTAGATACCCTGGTAGTCCACGCCGTAAACGATGAGTGCTAAGTGTTAGAGGGTTTCCGCCCTTTAGTGCTGCAGCTAACGCATTAAGCACTCCGCCTGGGGAGTACGGCCGCAAGGCTGAAACTCAAAGGAATTGACGGGGGCCCGCACAAGCGGTGGAGCATGTGGTTTAA…	PZ394899	99.6	753	Bacillus butanolivorans	k__Bacteria	p__Firmicutes	c__Bacilli	o__Bacillales	f__Bacillaceae	g__Bacillus	s__butanolivorans	0	0	0	0	Not tested	0	0	0
Son3cp7	3°51′43″N, 76°20′57″W; Sonso Lagoon natural park, Guadalajara de Buga, Valle del Cauca, Colombia	Sonso3	Root	TSA	TGGGCGTAAAGCGCGCGCAGGCGGTCTCTTAAGTCTGATGTGAAAGCCCACGGCTCAACCGTGGAGGGTCATTGGAAACTGGGAGACTTGAGTGCAGGAGAGAAAAGTGGAATTCCACGTGTAGCGGTGAAATGCGTAGAGATGTGGAGGAACACCAGTGGCGAAGGCGGCTTTTTGGCCTGTAACTGACGCTGAGGCGCGAAAGCGTGGGGAGCAAACAGGATTAGATACCCTGGTAGTCCACGCCGTAAACGATGAGTGCTAGGTGTTGGGGGGTTCCACCCTCAGTGCTGAAGTTAACACATTAAGCACTCCGCCTGGGGAGTACGACCGCAAGGTTGAAACTCAAAGGAATTGACGGGGGCCCGCACAAGCAGTGGAGCATGTGGTTTAATTCGA…	PZ394900	99.7	747	Fictibacillus nanhaiensis	k__Bacteria	p__Firmicutes	c__Bacilli	o__Bacillales	f__Bacillaceae	g__Fictibacillus	s__nanhaiensis	1	0	0	0	Not tested	0	0	0
Son3cp8	3°51′43″N, 76°20′57″W; Sonso Lagoon natural park, Guadalajara de Buga, Valle del Cauca, Colombia	Sonso3	Root	TSA	CGCGCGCAGGCGGTTCCTTAAGTCTGATGTGAAAGCCCACGGCTCAACCGTGGAGGGTCATTGGAAACTGGGGAACTTGAGTGCAGGAGAGAAAAGTGGAATTCCACGTGTAGCGGTGAAATGCGTAGAGATGTGGAGGAACACCAGTGGCGAAGGCGGCTTTTTGGCCTGTAACTGACGCTGAGGCGCGAAAGCGTGGGGAGCAAACAGGATTAGATACCCTGGTAGTCCACGCCGTAAACGATGAGTGCTAGGTGTTGGGGGGTTCCACCCTCAGTGCTGACGTTAACACATTAAGCACTCCGCCTGGGGAGTACGGCCGCAAGGCTGAAACTCAAAGGAATTGACGGGGGCCCGCACAAGCAGTGGAGCATGTGGTTTAATTCGAAGCAACGCGAA…	PZ394901	99.7	758	Fictibacillus rigui	k__Bacteria	p__Firmicutes	c__Bacilli	o__Bacillales	f__Bacillaceae	g__Fictibacillus	s__rigui	0	0	1	0	Not tested	0	0	0
Son3cp9	3°51′43″N, 76°20′57″W; Sonso Lagoon natural park, Guadalajara de Buga, Valle del Cauca, Colombia	Sonso3	Root	TSA	TATTGGGCGTAAAGCGCGCGCAGGCGGTTTCTTAAGTCTGATGTGAAAGCCCCCGGCTCAACCGGGGAGGGTCATTGGAAACTGGGAAACTTGAGTGCAGAAGAGGAAAGTGGAATTCCAAGTGTAGCGGTGAAATGCGTAGAGATTTGGAGGAACACCAGTGGCGAAGGCGACTTTCTGGTCTGTAACTGACGCTGAGGCGCGAAAGCGTGGGGAGCAAACAGGATTAGATACCCTGGTAGTCCACGCTGTAAACGATGAGTGCTAAGTGTTAGAGGGTTTCCGCCCTTTAGTGCTGAAGTTAACGCATTAAGCACTCCGCCTGGGGAGTACGGTCGCAAGACTGAAACTCAAAGGAATTGACGGGGGCCCGCACAAGTGGTGGAGCATGTGGTTTAA…	PZ394902	99.6	741	Gottfriedia endophytica	k__Bacteria	p__Firmicutes	c__Bacilli	o__Bacillales	f__Bacillaceae	g__Gottfriedia	s__endophytica	0	0	0	0	Not tested	0	0	0
Son3cp10	3°51′43″N, 76°20′57″W; Sonso Lagoon natural park, Guadalajara de Buga, Valle del Cauca, Colombia	Sonso3	Root	TSA	CGCGCGCAGGCGGTTTCTTAAGTCTGATGTGAAAGCCCACGGCTCAACCGTGGAGGGTCATTGGAAACTGGGGAACTTGAGTGCAGAAGAGAAAAGCGGAATTCCACGTGTAGCGGTGAAATGCGTAGAGATGTGGAGGAACACCAGTGGCGAAGGCGGCTTTTTGGTCTGTAACTGACGCTGAGGCGCGAAAGCGTGGGGAGCAAACAGGATTAGATACCCTGGTAGTCCACGCCGTAAACGATGAGTGCTAAGTGTTAGAGGGTTTCCGCCCTTTAGTGCTGCAGCTAACGCATTAAGCACTCCGCCTGGGGAGTACGGTCGCAAGACTGAAACTCAAAGGAATTGACGGGGGCCCGCACAAGCGGTGGAGCATGTGGTTTAATTCGAAGCAACGCG…		100	739	Priestia megaterium	k__Bacteria	p__Firmicutes	c__Bacilli	o__Bacillales	f__Bacillaceae	g__Priestia	s__megaterium	0	0	0	0	Not tested	0	0	0
Son3cp11	3°51′43″N, 76°20′57″W; Sonso Lagoon natural park, Guadalajara de Buga, Valle del Cauca, Colombia	Sonso3	Root	TSA	TGGGCGTAAAGCGCGCGCAGGTGGTTTCTTAAGTCTGATGTGAAAGCCCACGGCTCAACCGTGGAGGGTCATTGGAAACTGGGGAACTTGAGTGCAGAAGAGGAAAGTGGAATTCCAAGTGTAGCGGTGAAATGCGTAGATATTTGGAGGAACACCAGTGGCGAAGGCGACTTTCTGGTCTGTAACTGACACTGAGGCGCGAAAGCGTGGGGAGCAAACAGGATTAGATACCCTGGTAGTCCACGCCGTAAACGATGAGTGCTAAGTGTTAGAGGGTTTCCGCCCTTTAGTGCTGCAGCTAACGCATTAAGCACTCCGCCTGGGGAGTACGGTCGCAAGACTGAAACTCAAAGGAATTGACGGGGGCCCGCACAAGCGGTGGAGCATGTGGTTTAATTC…		99.7	760	Bacillus oryzaecorticis	k__Bacteria	p__Firmicutes	c__Bacilli	o__Bacillales	f__Bacillaceae	g__Bacillus	s__oryzaecorticis	0	0	0	1	Not tested	0	0	0
Son3cp12	3°51′43″N, 76°20′57″W; Sonso Lagoon natural park, Guadalajara de Buga, Valle del Cauca, Colombia	Sonso3	Root	TSA	CGCGCGCAGGTGGTTTCTTAAGTCTGATGTGAAAGCCCACGGCTCAACCGTGGAGGGTCATTGGAAACTGGGAGACTTGAGTGCAGAAGAGGAAAGTGGAATTCCATGTGTAGCGGTGAAATGCGTAGAGATATGGAGGAACACCAGTGGCGAAGGCGACTTTCTGGTCTGTAACTGACACTGAGGCGCGAAAGCGTGGGGAGCAAACAGGATTAGATACCCTGGTAGTCCACGCCGTAAACGATGAGTGCTAAGTGTTAGAGGGTTTCCGCCCTTTAGTGCTGAAGTTAACGCATTAAGCACTCCGCCTGGGGAGTACGGCCGCAAGGCTGAAACTCAAAGGAATTGACGGGGGCCCGCACAAGCGGTGGAGCATGTGGTTTAATTCGAAGCAACGCG…		100	717	Bacillus thuringiensis	k__Bacteria	p__Firmicutes	c__Bacilli	o__Bacillales	f__Bacillaceae	g__Bacillus	s__thuringiensis	0	0	0	0	Not tested	0	0	0
Son3cp13	3°51′43″N, 76°20′57″W; Sonso Lagoon natural park, Guadalajara de Buga, Valle del Cauca, Colombia	Sonso3	Root	TSA	AGCGCGCGCAGGCGGTCCTTTAAGTCTGATGTGAAAGCCCACGGCTCAACCGTGGAGGGTCATTGGAAACTGGGGGACTTGAGTGCAGAAGAGGAAAGCGGAATTCCACGTGTAGCGGTGAAATGCGTAGAGATGTGGAGGAACACCAGTGGCGAAGGCGGCTTTCTGGTCTGTAACTGACGCTGAGGCGCGAAAGCGTGGGGAGCAAACAGGATTAGATACCCTGGTAGTCCACGCCGTAAACGATGAGTGCTAAGTGTTAGAGGGTTTCCGCCCTTTAGTGCTGCAGCTAACGCATTAAGCACTCCGCCTGGGGAGTACGGCCGCAAGGCTGAAACTCAAAGGAATTGACGGGGGCCCGCACAAGCGGTGGAGCATGTGGTTTAATTCGAAGCAACG…		99.7	733	Bacillus niacini	k__Bacteria	p__Firmicutes	c__Bacilli	o__Bacillales	f__Bacillaceae	g__Bacillus	s__niacini	0	0	0	0	Not tested	0	0	0
Son3cp14	3°51′43″N, 76°20′57″W; Sonso Lagoon natural park, Guadalajara de Buga, Valle del Cauca, Colombia	Sonso3	Root	TSA													1	0	0	0	Not tested	0	0	0
Son4cp1	3°51′43″N, 76°20′57″W; Sonso Lagoon natural park, Guadalajara de Buga, Valle del Cauca, Colombia	Sonso4	Root	TSA	TTGGGCGTAAAGCGCGCGCAGGCGGTTTCTTAAGTCTGATGTGAAAGCCCACGGCTCAACCGTGGAGGGTCATTGGAAACTGGGGAACTTGAGTGCAGAAGAGAAAAGCGGAATTCCACGTGTAGCGGTGAAATGCGTAGAGATGTGGAGGAACACCAGTGGCGAAGGCGGCTTTTTGGTCTGTAACTGACGCTGAGGCGCGAAAGCGTGGGGAGCAAACAGGATTAGATACCCTGGTAGTCCACGCCGTAAACGATGAGTGCTAAGTGTTAGAGGGTTTCCGCCCTTTAGTGCTGCAGCTAACGCATTAAGCACTCCGCCTGGGGAGTACGGTCGCAAGACTGAAACTCAAAGGAATTGACGGGGGCCCGCACAAGCGGTGGAGCATGTGGTTTAATT…	PZ394907	94.9	739	Bacillus megaterium	k__Bacteria	p__Firmicutes	c__Bacilli	o__Bacillales	f__Bacillaceae	g__Bacillus	s__megaterium	0	0	1	0	Not tested	0	0	0
Son4cp2	3°51′43″N, 76°20′57″W; Sonso Lagoon natural park, Guadalajara de Buga, Valle del Cauca, Colombia	Sonso4	Root	TSA	CGCGCGCAGGCGGTTCCTTAAGTCTGATGTGAAAGCCCACGGCTCAACCGTGGAGGGTCATTGGAAACTGGGGAACTTGAGTGCAGGAGAGAAAAGTGGAATTCCACGTGTAGCGGTGAAATGCGTAGAGATGTGGAGGAACACCAGTGGCGAAGGCGGCTTTTTGGCCTGTAACTGACGCTGAGGCGCGAAAGCGTGGGGAGCAAACAGGATTAGATACCCTGGTAGTCCACGCCGTAAACGATGAGTGCTAGGTGTTGGGGGGTTCCACCCTCAGTGCTGACGTTAACACATTAAGCACTCCGCCTGGGGAGTACGGCCGCAAGGCTGAAACTCAAAGGAATTGACGGGGGCCCGCACAAGCAGTGGAGCATGTGGTTTAATTCGAAGCAACGCGAA…	PZ394908	99.6	735	Fictibacillus rigui	k__Bacteria	p__Firmicutes	c__Bacilli	o__Bacillales	f__Bacillaceae	g__Fictibacillus	s__rigui	0	0	0	0	Not tested	0	0	0
Son4cp3	3°51′43″N, 76°20′57″W; Sonso Lagoon natural park, Guadalajara de Buga, Valle del Cauca, Colombia	Sonso4	Root	TSA	TATTGGGCGTAAAGCGCGCGCAGGCGGTTCCTTAAGTCTGATGTGAAAGCCCACGGCTCAACCGTGGAGGGTCATTGGAAACTGGGGAACTTGAGTGCAGGAGAGAAAAGTGGAATTCCACGTGTAGCGGTGAAATGCGTAGAGATGTGGAGGAACACCAGTGGCGAAGGCGGCTTTTTGGCCTGTAACTGACGCTGAGGCGCGAAAGCGTGGGGAGCAAACAGGATTAGATACCCTGGTAGTCCACGCCGTAAACGATGAGTGCTAGGTGTTGGGGGGTTCCACCCTCAGTGCTGACGTTAACACATTAAGCACTCCGCCTGGGGAGTACGGCCGCAAGGCTGAAACTCAAAGGAATTGACGGGGGCCCGCACAAGCAGTGGAGCATGTGGTTTAATT…	PZ394909	99.7	761	Fictibacillus rigui	k__Bacteria	p__Firmicutes	c__Bacilli	o__Bacillales	f__Bacillaceae	g__Fictibacillus	s__rigui	0	0	0	0	Not tested	0	0	0
Son4cp4	3°51′43″N, 76°20′57″W; Sonso Lagoon natural park, Guadalajara de Buga, Valle del Cauca, Colombia	Sonso4	Root	TSA	CGCGCGCAGGTGGTTTCTTAAGTCTGATGTGAAAGCCCACGGCTCAACCGTGGAGGGTCATTGGAAACTGGGGAACTTGAGTGCAGAAGAGGAAAGTGGAATTCCAAGTGTAGCGGTGAAATGCGTAGATATTTGGAGGAACACCAGTGGCGAAGGCGACTTTCTGGTCTGTAACTGACACTGAGGCGCGAAAGCGTGGGGAGCAAACAGGATTAGATACCCTGGTAGTCCACGCCGTAAACGATGAGTGCTAAGTGTTAGAGGGTTTCCGCCCTTTAGTGCTGCAGCTAACGCATTAAGCACTCCGCCTGGGGAGTACGGTCGCAAGACTGAAACTCAAAGGAATTGACGGGGGCCCGCACAAGCGGTGGAGCATGTGGTTTAATTCGAAGCAACGCG…	PZ394910	100	760	Rossellomorea marisflavi	k__Bacteria	p__Firmicutes	c__Bacilli	o__Bacillales	f__Bacillaceae	g__Rossellomorea	s__marisflavi	1	0	0	0	Not tested	0	0	0
Son4cp5	3°51′43″N, 76°20′57″W; Sonso Lagoon natural park, Guadalajara de Buga, Valle del Cauca, Colombia	Sonso4	Root	TSA	GCGCGCGCAGGCGGTTTCTTAAGTCTGATGTGAAAGCCCCCGGCTCAACCGGGGAGGGTCATTGGAAACTGGGAAACTTGAGTGCAGAAGAGGAAAGTGGAATTCCAAGTGTAGCGGTGAAATGCGTAGAGATTTGGAGGAACACCAGTGGCGAAGGCGACTTTCTGGTCTGTAACTGACGCTGAGGCGCGAAAGCGTGGGGAGCAAACAGGATTAGATACCCTGGTAGTCCACGCTGTAAACGATGAGTGCTAAGTGTTAGAGGGTTTCCGCCCTTTAGTGCTGAAGTTAACGCATTAAGCACTCCGCCTGGGGAGTACGGTCGCAAGACTGAAACTCAAAGGAATTGACGGGGGCCCGCACAAGTGGTGGAGCATGTGGTTTAATTCGAAGCAACGC…	PZ394911	99.6	736	Gottfriedia endophytica	k__Bacteria	p__Firmicutes	c__Bacilli	o__Bacillales	f__Bacillaceae	g__Gottfriedia	s__endophytica	0	0	0	0	Not tested	0	0	0
Son4cp6	3°51′43″N, 76°20′57″W; Sonso Lagoon natural park, Guadalajara de Buga, Valle del Cauca, Colombia	Sonso4	Root	TSA	AAACGATGAGTGCAAAGGGTGGGAGGGTTTCCGCCCTTCAGTGCTGCAGCTAACCCATTAACCACTCCGCCTGGGGAGTACGACCGCAAGGTTGAAACTCAAAGGAATTGACGGGGGCCCGCACAAGCGGTGGAGCATGTGGTTTAATTCAAAGAAACGGGAAAAACCTTACCAGGTCTTGCCTTCCTTTGACCACTCA	PZ394912	68.7	199	Enterococcus faecium	k__Bacteria	p__Firmicutes	c__Bacilli	o__Lactobacillales	f__Enterococcaceae	g__Enterococcus	s__faecium	0	0	0	1	Not tested	0	0	0
Son4cp7	3°51′43″N, 76°20′57″W; Sonso Lagoon natural park, Guadalajara de Buga, Valle del Cauca, Colombia	Sonso4	Root	TSA	ATTGGGCGTAAAGCGCGCGCAGGCGGTCTCTTAAGTCTGATGTGAAAGCCCACGGCTCAACCGTGGAGGGTCATTGGAAACTGGGAGACTTGAGTGCAGGAGAGAAAAGTGGAATTCCACGTGTAGCGGTGAAATGCGTAGAGATGTGGAGGAACACCAGTGGCGAAGGCGGCTTTTTGGCCTGTAACTGACGCTGAGGCGCGAAAGCGTGGGGAGCAAACAGGATTAGATACCCTGGTAGTCCACGCCGTAAACGATGAGTGCTAGGTGTTGGGGGGTTCCACCCTCAGTGCTGAAGTTAACACATTAAGCACTCCGCCTGGGGAGTACGACCGCAAGGTTGAAACTCAAAGGAATTGACGGGGGCCCGCACAAGCAGTGGAGCATGTGGTTTAATTC…	PZ394913	99.6	748	Fictibacillus nanhaiensis	k__Bacteria	p__Firmicutes	c__Bacilli	o__Bacillales	f__Bacillaceae	g__Fictibacillus	s__nanhaiensis	0	0	0	0	Not tested	0	0	0
Son4cp8	3°51′43″N, 76°20′57″W; Sonso Lagoon natural park, Guadalajara de Buga, Valle del Cauca, Colombia	Sonso4	Root	TSA													1	0	0	0	Not tested	0	0	0
Son4cp9	3°51′43″N, 76°20′57″W; Sonso Lagoon natural park, Guadalajara de Buga, Valle del Cauca, Colombia	Sonso4	Root	TSA	GCGCGCGCAGGCGGTTTCTTAAGTCTGATGTGAAAGCCCCCGGCTCAACCGGGGAGGGTCATTGGAAACTGGGAAACTTGAGTGCAGAAGAGGAAAGTGGAATTCCAAGTGTAGCGGTGAAATGCGTAGAGATTTGGAGGAACACCAGTGGCGAAGGCGACTTTCTGGTCTGTAACTGACGCTGAGGCGCGAAAGCGTGGGGAGCAAACAGGATTAGATACCCTGGTAGTCCACGCTGTAAACGATGAGTGCTAAGTGTTAGAGGGTTTCCGCCCTTTAGTGCTGAAGTTAACGCATTAAGCACTCCGCCTGGGGAGTACGGTCGCAAGACTGAAACTCAAAGGAATTGACGGGGGCCCGCACAAGTGGTGGAGCATGTGGTTTAATTCGAAGCAACGC…	PZ394914	99.6	737	Gottfriedia endophytica	k__Bacteria	p__Firmicutes	c__Bacilli	o__Bacillales	f__Bacillaceae	g__Gottfriedia	s__endophytica	0	0	0	0	Not tested	0	0	0
Son4cp10	3°51′43″N, 76°20′57″W; Sonso Lagoon natural park, Guadalajara de Buga, Valle del Cauca, Colombia	Sonso4	Root	TSA	TTGGGCGTAAAGCGCGCGCAGGCGGTTTCTTAAGTCTGATGTGAAAGCCCCCGGCTCAACCGGGGAGGGTCATTGGAAACTGGGAAACTTGAGTGCAGAAGAGGAAAGTGGAATTCCAAGTGTAGCGGTGAAATGCGTAGAGATTTGGAGGAACACCAGTGGCGAAGGCGACTTTCTGGTCTGTAACTGACGCTGAGGCGCGAAAGCGTGGGGAGCAAACAGGATTAGATACCCTGGTAGTCCACGCTGTAAACGATGAGTGCTAAGTGTTAGAGGGTTTCCGCCCTTTAGTGCTGAAGTTAACGCATTAAGCACTCCGCCTGGGGAGTACGGTCGCAAGACTGAAACTCAAAGGAATTGACGGGGGCCCGCACAAGTGGTGGAGCATGTGGTTTAATT…		99.6	780	Gottfriedia endophytica	k__Bacteria	p__Firmicutes	c__Bacilli	o__Bacillales	f__Bacillaceae	g__Gottfriedia	s__endophytica	0	0	1	0	Not tested	0	0	0
Son4cp11	3°51′43″N, 76°20′57″W; Sonso Lagoon natural park, Guadalajara de Buga, Valle del Cauca, Colombia	Sonso4	Root	TSA	TATTGGGCGTAAAGCGCGCGCAGGCGGTTTCTTAAGTCTGATGTGAAAGCCCCCGGCTCAACCGGGGAGGGTCATTGGAAACTGGGAAACTTGAGTGCAGAAGAGGAAAGTGGAATTCCAAGTGTAGCGGTGAAATGCGTAGAGATTTGGAGGAACACCAGTGGCGAAGGCGACTTTCTGGTCTGTAACTGACGCTGAGGCGCGAAAGCGTGGGGAGCAAACAGGATTAGATACCCTGGTAGTCCACGCTGTAAACGATGAGTGCTAAGTGTTAGAGGGTTTCCGCCCTTTAGTGCTGAAGTTAACGCATTAAGCACTCCGCCTGGGGAGTACGGTCGCAAGACTGAAACTCAAAGGAATTGACGGGGGCCCGCACAAGTGGTGGAGCATGTGGTTTAA…		99.6	680	Gottfriedia endophytica	k__Bacteria	p__Firmicutes	c__Bacilli	o__Bacillales	f__Bacillaceae	g__Gottfriedia	s__endophytica	0	0	0	0	Not tested	0	0	0
Son4cp12	3°51′43″N, 76°20′57″W; Sonso Lagoon natural park, Guadalajara de Buga, Valle del Cauca, Colombia	Sonso4	Root	TSA	AGCGCGCGCAGGCGGTTTCTTAAGTCTGATGTGAAAGCCCACGGCTCAACCGTGGAGGGTCATTGGAAACTGGGGAACTTGAGTGCAGAAGAGAAAAGCGGAATTCCACGTGTAGCGGTGAAATGCGTAGAGATGTGGAGGAACACCAGTGGCGAAGGCGGCTTTTTGGTCTGTAACTGACGCTGAGGCGCGAAAGCGTGGGGAGCAAACAGGATTAGATACCCTGGTAGTCCACGCCGTAAACGATGAGTGCTAAGTGTTAGAGGGTTTCCGCCCTTTAGTGCTGCAGCTAACGCATTAAGCACTCCGCCTGGGGAGTACGGTCGCAAGACTGAAACTCAAAGGAATTGACGGGGGCCCGCACAAGCGGTGGAGCATGTGGTTTAATTCGAAGCAACG…		100	739	Priestia megaterium	k__Bacteria	p__Firmicutes	c__Bacilli	o__Bacillales	f__Bacillaceae	g__Priestia	s__megaterium	0	0	0	0	Not tested	0	0	0
Son4cp13	3°51′43″N, 76°20′57″W; Sonso Lagoon natural park, Guadalajara de Buga, Valle del Cauca, Colombia	Sonso4	Root	TSA	CGCGCGCAGGCGGTTCCTTAAGTCTGATGTGAAAGCCCACGGCTCAACCGTGGAGGGTCATTGGAAACTGGGGAACTTGAGGACAGAAGAGGAGAGTGGAATTCCACGTGTAGCGGTGAAATGCGTAGATATGTGGAGGAACACCAGTGGCGAAGGCGACTCTCTGGTCTGTTTCTGACGCTGAGGTGCGAAAGCGTGGGTAGCAAACAGGATTAGATACCCTGGTAGTCCACGCCGTAAACGATGAGTGCTAGGTGTTAGGGGGCTTCCACCCCTTAGTGCTGAAGTTAACGCATTAAGCACTCCGCCTGGGGAGTACGGCCGCAAGGCTGAAACTCAAAGGAATTGACGGGGGCCCGCACAAGCGGTGGAGCATGTGGTTTAATTCGAAGCAACGCG…		99.7	719	Halobacillus dabanensis	k__Bacteria	p__Firmicutes	c__Bacilli	o__Bacillales	f__Bacillaceae	g__Halobacillus	s__dabanensis	0	0	0	1	Not tested	0	0	0
Son4cp14	3°51′43″N, 76°20′57″W; Sonso Lagoon natural park, Guadalajara de Buga, Valle del Cauca, Colombia	Sonso4	Root	TSA	ATTGGGCGTAAAGCGCGCGCAGGCGGTTCCTTAAGTCTGATGTGAAAGCCCACGGCTCAACCGTGGAGGGTCATTGGAAACTGGGGAACTTGAGTGCAGGAGAGAAAAGTGGAATTCCACGTGTAGCGGTGAAATGCGTAGAGATGTGGAGGAACACCAGTGGCGAAGGCGGCTTTTTGGCCTGTAACTGACGCTGAGGCGCGAAAGCGTGGGGAGCAAACAGGATTAGATACCCTGGTAGTCCACGCCGTAAACGATGAGTGCTAGGTGTTGGGGGGTTCCACCCTCAGTGCTGACGTTAACACATTAAGCACTCCGCCTGGGGAGTACGGCCGCAAGGCTGAAACTCAAAGGAATTGACGGGGGCCCGCACAAGCAGTGGAGCATGTGGTTTAATTC…		99.7	748	Fictibacillus rigui	k__Bacteria	p__Firmicutes	c__Bacilli	o__Bacillales	f__Bacillaceae	g__Fictibacillus	s__rigui	0	0	0	0	Not tested	0	0	0
Son4cp15	3°51′43″N, 76°20′57″W; Sonso Lagoon natural park, Guadalajara de Buga, Valle del Cauca, Colombia	Sonso4	Root	TSA	CGCGCGCAGGCGGTTTCTTAAGTCTGATGTGAAAGCCCCCGGCTCAACCGGGGAGGGTCATTGGAAACTGGGAAACTTGAGTGCAGAAGAGGAAAGTGGAATTCCAAGTGTAGCGGTGAAATGCGTAGAGATTTGGAGGAACACCAGTGGCGAAGGCGACTTTCTGGTCTGTAACTGACGCTGAGGCGCGAAAGCGTGGGGAGCAAACAGGATTAGATACCCTGGTAGTCCACGCTGTAAACGATGAGTGCTAAGTGTTAGAGGGTTTCCGCCCTTTAGTGCTGAAGTTAACGCATTAAGCACTCCGCCTGGGGAGTACGGTCGCAAGACTGAAACTCAAAGGAATTGACGGGGGCCCGCACAAGTGGTGGAGCATGTGGTTTAATTCGAAGCAACGCG…		99.7	755	Gottfriedia endophytica	k__Bacteria	p__Firmicutes	c__Bacilli	o__Bacillales	f__Bacillaceae	g__Gottfriedia	s__endophytica	1	0	0	0	Not tested	0	0	0
Son4cp16	3°51′43″N, 76°20′57″W; Sonso Lagoon natural park, Guadalajara de Buga, Valle del Cauca, Colombia	Sonso4	Root	TSA	TTGGGCGTAAAGCGCGCGCAGGCGGTCTCTTAAGTCTGATGTGAAAGCCCACGGCTCAACCGTGGAGGGTCATTGGAAACTGGGAGACTTGAGTGCAGGAGAGAAAAGTGGAATTCCACGTGTAGCGGTGAAATGCGTAGAGATGTGGAGGAACACCAGTGGCGAAGGCGGCTTTTTGGCCTGTAACTGACGCTGAGGCGCGAAAGCGTGGGGAGCAAACAGGATTAGATACCCTGGTAGTCCACGCCGTAAACGATGAGTGCTAGGTGTTGGGGGGTTCCACCCTCAGTGCTGAAGTTAACACATTAAGCACTCCGCCTGGGGAGTACGACCGCAAGGTTGAAACTCAAAGGAATTGACGGGGGCCCGCACAAGCAGTGGAGCATGTGGTTTAATTCG…		99.7	741	Fictibacillus nanhaiensis	k__Bacteria	p__Firmicutes	c__Bacilli	o__Bacillales	f__Bacillaceae	g__Fictibacillus	s__nanhaiensis	0	0	0	1	Not tested	0	0	0
Son5cp1	3°51′43″N, 76°20′57″W; Sonso Lagoon natural park, Guadalajara de Buga, Valle del Cauca, Colombia	Sonso5	Root	TSA	GCGCGCGCAGGTGGTTTCTTAAGTCTGATGTGAAAGCCCACGGCTCAACCGTGGAGGGTCATTGGAAACTGGGGAACTTGAGTGCAGAAGAGGAAAGTGGAATTCCAAGTGTAGCGGTGAAATGCGTAGATATTTGGAGGAACACCAGTGGCGAAGGCGACTTTCTGGTCTGTAACTGACACTGAGGCGCGAAAGCGTGGGGAGCAAACAGGATTAGATACCCTGGTAGTCCACGCCGTAAACGATGAGTGCTAAGTGTTAGAGGGTTTCCGCCCTTTAGTGCTGCAGCTAACGCATTAAGCACTCCGCCTGGGGAGTACGGTCGCAAGACTGAAACTCAAAGGAATTGACGGGGGCCCGCACAAGCGGTGGAGCATGTGGTTTAATTCGAAGCAACGC…	PZ394922	100	662	Rossellomorea marisflavi	k__Bacteria	p__Firmicutes	c__Bacilli	o__Bacillales	f__Bacillaceae	g__Rossellomorea	s__marisflavi	0	0	0	0	Not tested	0	0	0
Son5cp2	3°51′43″N, 76°20′57″W; Sonso Lagoon natural park, Guadalajara de Buga, Valle del Cauca, Colombia	Sonso5	Root	TSA	AGCGCGCGCAGGCGGTTAATTAAGTCTGGTGTTTAAGGCTGGGGCTCAACCCCGGTTCGCACTGGAAACTGGTTGACTTGAGTGCAGAAGAGGAAAGTGGAATTCCACGTGTAGCGGTGAAATGCGTAGAGATGTGGAGGAACACCAGTGGCGAAGGCGACTTTCTGGGCTGTAACTGACGCTGAGGCGCGAAAGCGTGGGGAGCAAACAGGATTAGATACCCTGGTAGTCCACGCCGTAAACGATGAATGCTAGGTGTTAGGGGTTTCGATACCCTTGGTGCCGAAGTTAACACATTAAGCATTCCGCCTGGGGAGTACGGTCGCAAGACTGAAACTCAAAGGAATTGACGGGGACCCGCACAAGCAGTGGAGTATGTGGTTTAATTCGAAGCAACGC…	PZ394923	98.8	727	Paenibacillus agaridevorans	k__Bacteria	p__Firmicutes	c__Bacilli	o__Paenibacillales	f__Paenibacillaceae	g__Paenibacillus	s__agaridevorans	0	0	1	0	Not tested	0	0	0
Son5cp3	3°51′43″N, 76°20′57″W; Sonso Lagoon natural park, Guadalajara de Buga, Valle del Cauca, Colombia	Sonso5	Root	TSA	TTGGGCGTAAAGCGCGCGCAGGCGGCTTTGTAAGTTTGGTGTTTAATCTCAGAGCTCAACTCTGATTCGCATCGAAAACTGCAAGGCTTGAGTACAGAAGAGGAAAGTGGAATTCCACGTGTAGCGGTGAAATGCGTAGAGATGTGGAGGAACACCAGTGGCGAAGGCGACTTTCTGGGCTGTAACTGACGCTGAGGCGCGAAAGCGTGGGGAGCAAACAGGATTAGATACCCTGGTAGTCCACGCCGTAAACGATGAATGCTAGGTGTTAGGGGTTTCGATACCCTTTGGTGCCGAAGTTAACACATTAAGCATTCCGCCTGGGGAGTACGCTCGCAAGAGTGAAACTCAAAGGAATTGACGGGGACCCGCACAAGCAGTGGAGTATGTGGTTTAATT…	PZ394924	98.5	733	Paenibacillus taihuensis	k__Bacteria	p__Firmicutes	c__Bacilli	o__Paenibacillales	f__Paenibacillaceae	g__Paenibacillus	s__taihuensis	1	0	0	0	Not tested	0	0	0
Son5cp4	3°51′43″N, 76°20′57″W; Sonso Lagoon natural park, Guadalajara de Buga, Valle del Cauca, Colombia	Sonso5	Root	TSA	TTGGGCGTAAAGCGCGCGCAGGCGGCCTTTTAAGTCTGATGTGAAATCTTGCGGCTCAACCGCAAGCGGCCATTGGAAACTGGGAGGCTTGAGTACAGAAGAGGAGAGTGGAATTCCACGTGTAGCGGTGAAATGCGTAGATATGTGGAGGAACACCAGTGGCGAAGGCGACTCTCTGGTCTGTAACTGACGCTGAGGCGCGAAAGCGTGGGGAGCAAACAGGATTAGATACCCTGGTAGTCCACGCCGTAAACGATGAGTGCTAGGTGTTAGGGGTTTCGATGCCCGTAGTGCCGAAGTTAACACATTAAGCACTCCGCCTGGGGAGTACGGCCGCAAGGCTGAAACTCAAAGGAATTGACGGGGGCCCGCACAAGCAGTGGAGCATGTGGTTTAATT…	PZ394925	99.3	747	Bacillus gibsonii	k__Bacteria	p__Firmicutes	c__Bacilli	o__Bacillales	f__Bacillaceae	g__Bacillus	s__gibsonii	0	0	0	0	Not tested	0	0	0
Son5cp5	3°51′43″N, 76°20′57″W; Sonso Lagoon natural park, Guadalajara de Buga, Valle del Cauca, Colombia	Sonso5	Root	TSA	CGCGCAGGCGGTTCCTTAAGTCTGATGTGAAAGCCCACGGCTCAACCGTGGAGGGTCATTGGAAACTGGGGAACTTGAGTGCAGGAGAGAAAAGTGGAATTCCACGTGTAGCGGTGAAATGCGTAGAGATGTGGAGGAACACCAGTGGCGAAGGCGGCTTTTTGGCCTGTAACTGACGCTGAGGCGCGAAAGCGTGGGGAGCAAACAGGATTAGATACCCTGGTAGTCCACGCCGTAAACGATGAGTGCTAGGTGTTGGGGGGTTCCACCCTCAGTGCTGACGTTAACACATTAAGCACTCCGCCTGGGGAGTACGGCCGCAAGGCTGAAACTCAAAGGAATTGACGGGGGCCCGCACAAGCAGTGGAGCATGTGGTTTAATTCGAAGCAACGCGAAGA…	PZ394926	99.9	726	Fictibacillus rigui	k__Bacteria	p__Firmicutes	c__Bacilli	o__Bacillales	f__Bacillaceae	g__Fictibacillus	s__rigui	0	0	0	0	Not tested	0	0	0
Son5cp6	3°51′43″N, 76°20′57″W; Sonso Lagoon natural park, Guadalajara de Buga, Valle del Cauca, Colombia	Sonso5	Root	TSA	CGCGCGCAGGCGGCCTTGTAAGTCTGTCGTTTAAACTCGGAGCTCAACTTCGAGTCGCGATGGAAACTGCAAAGCTTGAGTGCAGAAGAGGAAAGTGGAATTCCACGTGTAGCGGTGAAATGCGTAGAGATGTGGAGGAACACCAGTGGCGAAGGCGACTTTCTGGGCTGTAACTGACGCTGAGGCGCGAAAGCGTGGGGAGCAAACAGGATTAGATACCCTGGTAGTCCACGCCGTAAACGATGAATGCTAGGTGTTAGGGGTTTCGATACCCTTGGTGCCGAAGTTAACACATTAAGCATTCCGCCTGGGGAGTACGGTCGCAAGACTGAAACTCAAAGGAATTGACGGGGACCCGCACAAGCAGTGGAGTATGTGGTTTAATTCGAAGCAACGCGA…	PZ394927	100	718	Paenibacillus catalpae	k__Bacteria	p__Firmicutes	c__Bacilli	o__Paenibacillales	f__Paenibacillaceae	g__Paenibacillus	s__catalpae	0	1	0	0	Not tested	0	0	0
Son5cp7	3°51′43″N, 76°20′57″W; Sonso Lagoon natural park, Guadalajara de Buga, Valle del Cauca, Colombia	Sonso5	Root	TSA	TGGGCGTAAAGCGCGCGCAGGCGGTCCTTTAAGTCTGATGTGAAAGCCCACGGCTCAACCGTGGAGGGTCATTGGAAACTGGGGGACTTGAGTGCAGAAGAGGAAAGTGGAATTCCAAGTGTAGCGGTGAAATGCGTAGAGATTTGGAGGAACACCAGTGGCGAAGGCGACTTTCTGGTCTGTAACTGACGCTGAGGCGCGAAAGCGTGGGGAGCAAACAGGATTAGATACCCTGGTAGTCCACGCCGTAAACGATGAGTGCTAAGTGTTAGGGGGTTTCCGCCCCTTAGTGCTGCAGCTAACGCATTAAGCACTCCGCCTGGGGAGTACGGTCGCAAGACTGAAACTCAAAGGAATTGACGGGGGCCCGCACAAGCGGTGGAGCATGTGGTTTAATTC…	PZ394928	99.6	760	Lysinibacillus xylanilyticus	k__Bacteria	p__Firmicutes	c__Bacilli	o__Bacillales	f__Planococcaceae	g__Lysinibacillus	s__xylanilyticus	0	0	0	1	Not tested	0	0	0
Son6cp1	3°51′43″N, 76°20′57″W; Sonso Lagoon natural park, Guadalajara de Buga, Valle del Cauca, Colombia	Sonso6	Root	TSA	TTGGGCGTAAAGCGCGCGCAGGTGGTTTCTTAAGTCTGATGTGAAAGCCCACGGCTCAACCGTGGAGGGTCATTGGAAACTGGGGAACTTGAGTGCAGAAGAGGAAAGTGGAATTCCAAGTGTAGCGGTGAAATGCGTAGATATTTGGAGGAACACCAGTGGCGAAGGCGACTTTCTGGTCTGTAACTGACACTGAGGCGCGAAAGCGTGGGGAGCAAACAGGATTAGATACCCTGGTAGTCCACGCCGTAAACGATGAGTGCTAAGTGTTAGAGGGTTTCCGCCCTTTAGTGCTGCAGCTAACGCATTAAGCACTCCGCCTGGGGAGTACGGTCGCAAGACTGAAACTCAAAGGAATTGACGGGGGCCCGCACAAGCGGTGGAGCATGTGGTTTAATT…	PZ394929	100	733	Rossellomorea marisflavi	k__Bacteria	p__Firmicutes	c__Bacilli	o__Bacillales	f__Bacillaceae	g__Rossellomorea	s__marisflavi	0	0	0	0	Not tested	0	0	0
Son6cp2	3°51′43″N, 76°20′57″W; Sonso Lagoon natural park, Guadalajara de Buga, Valle del Cauca, Colombia	Sonso6	Root	TSA	GGGCGTAAAGCGCGCGCAGGTGGTTTCTTAAGTCTGATGTGAAAGCCCACGGCTCAACCGTGGAGGGTCATTGGAAACTGGGAGACTTGAGTGCAGAAGAGGAAAGTGGAATTCCATGTGTAGCGGTGAAATGCGTAGAGATATGGAGGAACACCAGTGGCGAAGGCGACTTTCTGGTCTGTAACTGACACTGAGGCGCGAAAGCGTGGGGAGCAAACAGGATTAGATACCCTGGTAGTCCACGCCGTAAACGATGAGTGCTAAGTGTTAGAGGGTTTCCGCCCTTTAGTGCTGAAGTTAACGCATTAAGCACTCCGCCTGGGGAGTACGGCCGCAAGGCTGAAACTCAAAGGAATTGACGGGGGCCCGCACAAGCGGTGGAGCATGTGGTTTAATTCG…	PZ394930	94.9	738	Bacillus thuringiensis	k__Bacteria	p__Firmicutes	c__Bacilli	o__Bacillales	f__Bacillaceae	g__Bacillus	s__thuringiensis	0	0	0	0	Not tested	0	2	0
Son6cp3	3°51′43″N, 76°20′57″W; Sonso Lagoon natural park, Guadalajara de Buga, Valle del Cauca, Colombia	Sonso6	Root	TSA	GCGTAAAGCGCGCGCAGGTGGTTTCTTAAGTCTGATGTGAAAGCCCACGGCTCAACCGTGGAGGGTCATTGGAAACTGGGGAACTTGAGTGCAGAAGAGGAAAGTGGAATTCCAAGTGTAGCGGTGAAATGCGTAGATATTTGGAGGAACACCAGTGGCGAAGGCGACTTTCTGGTCTGTAACTGACACTGAGGCGCGAAAGCGTGGGGAGCAAACAGGATTAGATACCCTGGTAGTCCACGCCGTAAACGATGAGTGCTAAGTGTTAGAGGGTTTCCGCCCTTTAGTGCTGCAGCTAACGCATTAAGCACTCCGCCTGGGGAGTACGGTCGCAAGACTGAAACTCAAAGGAATTGACGGGGGCCCGCACAAGCGGTGGAGCATGTGGTTTAATTCGAA…	PZ394931	100	728	Rossellomorea marisflavi	k__Bacteria	p__Firmicutes	c__Bacilli	o__Bacillales	f__Bacillaceae	g__Rossellomorea	s__marisflavi	1	0	0	0	Not tested	0	0	0
Son6cp4	3°51′43″N, 76°20′57″W; Sonso Lagoon natural park, Guadalajara de Buga, Valle del Cauca, Colombia	Sonso6	Root	TSA	TATTGGGCGTAAAGCGCGCGCAGGCGGTTCCTTAAGTCTGATGTGAAAGCCCACGGCTCAACCGTGGAGGGTCATTGGAAACTGGGGAACTTGAGTGCAGGAGAGAAAAGTGGAATTCCACGTGTAGCGGTGAAATGCGTAGAGATGTGGAGGAACACCAGTGGCGAAGGCGGCTTTTTGGCCTGTAACTGACGCTGAGGCGCGAAAGCGTGGGGAGCAAACAGGATTAGATACCCTGGTAGTCCACGCCGTAAACGATGAGTGCTAGGTGTTGGGGGGTTCCACCCTCAGTGCTGACGTTAACACATTAAGCACTCCGCCTGGGGAGTACGGCCGCAAGGCTGAAACTCAAAGGAATTGACGGGGGCCCGCACAAGCAGTGGAGCATGTGGTTTAATT…	PZ394932	99.5	749	Fictibacillus rigui	k__Bacteria	p__Firmicutes	c__Bacilli	o__Bacillales	f__Bacillaceae	g__Fictibacillus	s__rigui	0	0	0	0	Not tested	0	0	0
Son7cp1	3°51′43″N, 76°20′57″W; Sonso Lagoon natural park, Guadalajara de Buga, Valle del Cauca, Colombia	Sonso7	Root	TSA	AAGCGCGCGCAGGCGGTCATTTAAGTCTGGTGTTTAATCCCGGGGCTCAACCCCGGATCGCACTGGAAACTGGGTGACTTGAGTGCAGAAGAGGAGAGTGGAATTCCACGTGTAGCGGTGAAATGCGTAGAGATGTGGAGGAACACCAGTGGCGAAGGCGACTCTCTGGGCTGTAACTGACGCTGAGGCGCGAAAGCGTGGGGAGCAAACAGGATTAGATACCCTGGTAGTCCACGCCGTAAACGATGAATGCTAGGTGTTAGGGGTTTCGATACCCTTGGTGCCGAAGTTAACACATTAAGCATTCCGCCTGGGGAGTACGGTCGCAAGACTGAAACTCAAAGGAATTGACGGGGACCCGCACAAGCAGTGGAGTATGTGGTTTAATTCGAAGCAACG…	PZ394933	94	682	Paenibacillus dongdonensis	k__Bacteria	p__Firmicutes	c__Bacilli	o__Paenibacillales	f__Paenibacillaceae	g__Paenibacillus	s__dongdonensis	0	0	1	0	Not tested	0	0	0
Son7cp2	3°51′43″N, 76°20′57″W; Sonso Lagoon natural park, Guadalajara de Buga, Valle del Cauca, Colombia	Sonso7	Root	TSA	GCGCGCGCAGGCGGCTATTTAAGTCTGGTGTTTAAACCTTGGGCTCAACCTGAGGTCGCACTGGAAACTGGGTGGCTTGAGTACAGAAGAGGAAAGTGGAATTCCACGTGTAGCGGTGAAATGCGTAGATATGTGGAGGAACACCAGTGGCGAAGGCGACTTTCTGGGCTGTAACTGACGCTGAGGCGCGAAAGCGTGGGGAGCAAACAGGATTAGATACCCTGGTAGTCCACGCCGTAAACGATGAGTGCTAGGTGTTAGGGGTTTCGATACCCTTGGTGCCGAAGTTAACACAGTAAGCACTCCGCCTGGGGAGTACGGTCGCAAGACTGAAACTCAAAGGAATTGACGGGGACCCGCACAAGCAGTGGAGTATGTGGTTTAATTCGAAGCAACGCG…	PZ394934	98.9	734	Paenibacillus graminis	k__Bacteria	p__Firmicutes	c__Bacilli	o__Paenibacillales	f__Paenibacillaceae	g__Paenibacillus	s__graminis	0	0	0	1	Not tested	0	0	0
Son7cp3	3°51′43″N, 76°20′57″W; Sonso Lagoon natural park, Guadalajara de Buga, Valle del Cauca, Colombia	Sonso7	Root	TSA	GGGCGTAAAGCGCGCGCAGGTGGTTCCTTAAGTCTGATGTGAAAGCCCCCGGCTCAACCGGGGAGGGTCATTGGAAACTGGGGAACTTGAGTGCAGGAGAGGAAAGTGGAATTCCACGTGTAGCGGTGAAATGCGTAGATATGTGGAGGAACACCAGTGGCGAAGGCGACTTTCTGGCCTGTAACTGACACTGAGGCGCGAAAGCGTGGGGAGCAAACAGGATTAGATACCCTGGTAGTCCACGCCGTAAACGATGAGTGCTAAGTGTTGGGGGGTTTCCGCCCCTCAGTGCTGCAGCTAACGCATTAAGCACTCCGCCTGGGGAGTACGGCCGCAAGGCTGAAACTCAAAGGAATTGACGGGGGCCCGCACAAGCGGTGGAGCATGTGGTTTAATTCG…	PZ394935	97.8	757	Jeotgalibacillus campisalis	k__Bacteria	p__Firmicutes	c__Bacilli	o__Bacillales	f__Planococcaceae	g__Jeotgalibacillus	s__campisalis	0	0	0	0	Not tested	0	0	0
Son7cp4	3°51′43″N, 76°20′57″W; Sonso Lagoon natural park, Guadalajara de Buga, Valle del Cauca, Colombia	Sonso7	Root	TSA	AGCGCGCGCAGGCGGTCTCTTAAGTCTGATGTGAAAGCCCACGGCTCAACCGTGGAGGGTCATTGGAAACTGGGAGACTTGAGTGCAGGAGAGAAAAGTGGAATTCCACGTGTAGCGGTGAAATGCGTAGAGATGTGGAGGAACACCAGTGGCGAAGGCGGCTTTTTGGCCTGTAACTGACGCTGAGGCGCGAAAGCGTGGGGAGCAAACAGGATTAGATACCCTGGTAGTCCACGCCGTAAACGATGAGTGCTAGGTGTTGGGGGGTTCCACCCTCAGTGCTGAAGTTAACACATTAAGCACTCCGCCTGGGGAGTACGACCGCAAGGTTGAAACTCAAAGGAATTGACGGGGGCCCGCACAAGCAGTGGAGCATGTGGTTTAATTCGAAGCAACGCG…	PZ394936	99.6	730	Fictibacillus nanhaiensis	k__Bacteria	p__Firmicutes	c__Bacilli	o__Bacillales	f__Bacillaceae	g__Fictibacillus	s__nanhaiensis	0	0	0	0	Not tested	0	0	0
Son7cp5	3°51′43″N, 76°20′57″W; Sonso Lagoon natural park, Guadalajara de Buga, Valle del Cauca, Colombia	Sonso7	Root	TSA	GGGCGTAAAGCGCGCGCAGGTGGTTTCTTAAGTCTGATGTGAAAGCCCACGGCTCAACCGTGGAGGGTCATTGGAAACTGGGGAACTTGAGTGCAGAAGAGGAAAGTGGAATTCCAAGTGTAGCGGTGAAATGCGTAGATATTTGGAGGAACACCAGTGGCGAAGGCGACTTTCTGGTCTGTAACTGACACTGAGGCGCGAAAGCGTGGGGAGCAAACAGGATTAGATACCCTGGTAGTCCACGCCGTAAACGATGAGTGCTAAGTGTTAGAGGGTTTCCGCCCTTTAGTGCTGCAGCTAACGCATTAAGCACTCCGCCTGGGGAGTACGGTCGCAAGACTGAAACTCAAAGGAATTGACGGGGGCCCGCACAAGCGGTGGAGCATGTGGTTTAATTCG…	PZ394937	95.4	588	Bacillus oryzaecorticis	k__Bacteria	p__Firmicutes	c__Bacilli	o__Bacillales	f__Bacillaceae	g__Bacillus	s__oryzaecorticis	1	0	0	0	Not tested	0	0	0
Son7cp6	3°51′43″N, 76°20′57″W; Sonso Lagoon natural park, Guadalajara de Buga, Valle del Cauca, Colombia	Sonso7	Root	TSA	GCGCGCGCAGGCGGTTCCTTAAGTCTGATGTGAAAGCCCACGGCTCAACCGTGGAGGGTCATTGGAAACTGGGGAACTTGAGGACAGAAGAGGAGAGTGGAATTCCACGTGTAGCGGTGAAATGCGTAGATATGTGGAGGAACACCAGTGGCGAAGGCGACTCTCTGGTCTGTTTCTGACGCTGAGGTGCGAAAGCGTGGGTAGCAAACAGGATTAGATACCCTGGTAGTCCACGCCGTAAACGATGAGTGCTAGGTGTTAGGGGGCTTCCACCCCTTAGTGCTGAAGTTAACGCATTAAGCACTCCGCNTGGGGAGTACGGCCGCAAGGCTGAAACTCAAAGGAATTGACGGGGGCCCGCACAAGCGGTGGAGCATGTGGTTTAATTCGAAGCAACGC…	PZ394938	99.9	726	Halobacillus marinus	k__Bacteria	p__Firmicutes	c__Bacilli	o__Bacillales	f__Bacillaceae	g__Halobacillus	s__marinus	0	0	0	0	Not tested	0	0	0
Son7cp7	3°51′43″N, 76°20′57″W; Sonso Lagoon natural park, Guadalajara de Buga, Valle del Cauca, Colombia	Sonso7	Root	TSA	CGCGCGCAGGCGGTTCCTTAAGTCTGATGTGAAAGCCCACGGCTCAACCGTGGAGGGTCATTGGAAACTGGGGAACTTGAGTGCAGGAGAGAAAAGTGGAATTCCACGTGTAGCGGTGAAATGCGTAGAGATGTGGAGGAACACCAGTGGCGAAGGCGGCTTTTTGGCCTGTAACTGACGCTGAGGCGCGAAAGCGTGGGGAGCAAACAGGATTAGATACCCTGGTAGTCCACGCCGTAAACGATGAGTGCTAGGTGTTGGGGGGTTCCACCCTCAGTGCTGACGTTAACACATTAAGCACTCCGCCTGGGGAGTACGGCCGCAAGGCTGAAACTCAAAGGAATTGACGGGGGCCCGCACAAGCAGTGGAGCATGTGGTTTAATTCGAAGCAACGCGAA…	PZ394939	100	736	Fictibacillus rigui	k__Bacteria	p__Firmicutes	c__Bacilli	o__Bacillales	f__Bacillaceae	g__Fictibacillus	s__rigui	0	1	0	0	Not tested	0	0	0
Son7cp8	3°51′43″N, 76°20′57″W; Sonso Lagoon natural park, Guadalajara de Buga, Valle del Cauca, Colombia	Sonso7	Root	TSA	ATTGGGCGTAAAGCGCGCGCAGGTGGTTTCTTAAGTCTGATGTGAAAGCCCACGGCTCAACCGTGGAGGGTCATTGGAAACTGGGGAACTTGAGTGCAGAAGAGGAAAGTGGAATTCCAAGTGTAGCGGTGAAATGCGTAGATATTTGGAGGAACACCAGTGGCGAAGGCGACTTTCTGGTCTGTAACTGACACTGAGGCGCGAAAGCGTGGGGAGCAAACAGGATTAGATACCCTGGTAGTCCACGCCGTAAACGATGAGTGCTAAGTGTTAGAGGGTTTCCGCCCTTTAGTGCTGCAGCTAACGCATTAAGCACTCCGCCTGGGGAGTACGGTCGCAAGACTGAAACTCAAAGGAATTGACGGGGGCCCGCACAAGCGGTGGAGCATGTGGTTTAAT…	PZ394940	99.6	762	Rossellomorea marisflavi	k__Bacteria	p__Firmicutes	c__Bacilli	o__Bacillales	f__Bacillaceae	g__Rossellomorea	s__marisflavi	0	0	0	1	Not tested	0	0	0
Son7cp9	3°51′43″N, 76°20′57″W; Sonso Lagoon natural park, Guadalajara de Buga, Valle del Cauca, Colombia	Sonso7	Root	TSA	TATTGGGCGTAAAGCGCGCGCAGGTGGTTTCTTAAGTCTGATGTGAAAGCCCACGGCTCAACCGTGGAGGGTCATTGGAAACTGGGGAACTTGAGTGCAGAAGAGGAAAGTGGAATTCCAAGTGTAGCGGTGAAATGCGTAGATATTTGGAGGAACACCAGTGGCGAAGGCGACTTTCTGGTCTGTAACTGACACTGAGGCGCGAAAGCGTGGGGAGCAAACAGGATTAGATACCCTGGTAGTCCACGCCGTAAACGATGAGTGCTAAGTGTTAGAGGGTTTCCGCCCTTTAGTGCTGCAGCTAACGCATTAAGCACTCCGCCTGGGGAGTACGGTCGCAAGACTGAAACTCAAAGGAATTGACGGGGGCCCGCACAAGCGGTGGAGCATGTGGTTTAA…	PZ394941	99.6	751	Rossellomorea marisflavi	k__Bacteria	p__Firmicutes	c__Bacilli	o__Bacillales	f__Bacillaceae	g__Rossellomorea	s__marisflavi	0	0	0	0	Not tested	0	0	0
Son7cp10	3°51′43″N, 76°20′57″W; Sonso Lagoon natural park, Guadalajara de Buga, Valle del Cauca, Colombia	Sonso7	Root	TSA	TTGGGCGTAAAGCGCGCGCAGGCGGCCTTTTAAGTCTGATGTGAAATCTTGCGGCTCAACCGCAAGCGGCCATTGGAAACTGGGAGGCTTGAGTACAGAAGAGGAGAGTGGAATTCCACGTGTAGCGGTGAAATGCGTAGATATGTGGAGGAACACCAGTGGCGAAGGCGACTCTCTGGTCTGTAACTGACGCTGAGGCGCGAAAGCGTGGGGAGCAAACAGGATTAGATACCCTGGTAGTCCACGCCGTAAACGATGAGTGCTAGGTGTTAGGGGTTTCGATGCCCGTAGTGCCGAAGTTAACACATTAAGCACTCCGCCTGGGGAGTACGGCCGCAAGGCTGAAACTCAAAGGAATTGACGGGGGCCCGCACAAGCAGTGGAGCATGTGGTTTAATT…		99.7	747	Bacillus gibsonii	k__Bacteria	p__Firmicutes	c__Bacilli	o__Bacillales	f__Bacillaceae	g__Bacillus	s__gibsonii	1	0	0	0	Not tested	0	0	0
Son7cp11	3°51′43″N, 76°20′57″W; Sonso Lagoon natural park, Guadalajara de Buga, Valle del Cauca, Colombia	Sonso7	Root	TSA	GCGCGCGCAGGCGGTTCCTTAAGTCTGATGTGAAAGCCCACGGCTCAACCGTGGAGGGTCATTGGAAACTGGGGAACTTGAGGACAGAAGAGGAGAGTGGAATTCCACGTGTAGCGGTGAAATGCGTAGATATGTGGAGGAACACCAGTGGCGAAGGCGACTCTCTGGTCTGTTTCTGACGCTGAGGTGCGAAAGCGTGGGTAGCAAACAGGATTAGATACCCTGGTAGTCCACGCCGTAAACGATGAGTGCTAGGTGTTAGGGGGCTTCCACCCCTTAGTGCTGAAGTTAACGCATTAAGCACTCCGCNTGGGGAGTACGGCCGCAAGGCTGAAACTCAAAGGAATTGACGGGGGCCCGCACAAGCGGTGGAGCATGTGGTTTAATTCGAAGCAACGC…		99.9	730	Halobacillus marinus	k__Bacteria	p__Firmicutes	c__Bacilli	o__Bacillales	f__Bacillaceae	g__Halobacillus	s__marinus	0	0	0	0	Not tested	0	0	0
Son8cp1	3°51′43″N, 76°20′57″W; Sonso Lagoon natural park, Guadalajara de Buga, Valle del Cauca, Colombia	Sonso8	Root	TSA	TTGGGCGTAAAGCGCGCGCAGGCGGTTCCTTAAGTCTGATGTGAAAGCCCACGGCTCAACCGTGGAGGGTCATTGGAAACTGGGGAACTTGAGTGCAGGAGAGAAAAGTGGAATTCCACGTGTAGCGGTGAAATGCGTAGAGATGTGGAGGAACACCAGTGGCGAAGGCGGCTTTTTGGCCTGTAACTGACGCTGAGGCGCGAAAGCGTGGGGAGCAAACAGGATTAGATACCCTGGTAGTCCACGCCGTAAACGATGAGTGCTAGGTGTTGGGGGGTTCCACCCTCAGTGCTGACGTTAACACATTAAGCACTCCGCCTGGGGAGTACGGCCGCAAGGCTGAAACTCAAAGGAATTGACGGGGGCCCGCACAAGCAGTGGAGCATGTGGTTTAATTCG…	PZ394944	99.5	749	Fictibacillus rigui	k__Bacteria	p__Firmicutes	c__Bacilli	o__Bacillales	f__Bacillaceae	g__Fictibacillus	s__rigui	0	0	1	0	Not tested	0	0	0
Son8cp2	3°51′43″N, 76°20′57″W; Sonso Lagoon natural park, Guadalajara de Buga, Valle del Cauca, Colombia	Sonso8	Root	TSA	AGCGCGCGCAGGCGGTCTCTTAAGTCTGATGTGAAAGCCCACGGCTCAACCGTGGAGGGTCATTGGAAACTGGGAGACTTGAGTGCAGGAGAGAAAAGTGGAATTCCACGTGTAGCGGTGAAATGCGTAGAGATGTGGAGGAACACCAGTGGCGAAGGCGGCTTTTTGGCCTGTAACTGACGCTGAGGCGCGAAAGCGTGGGGAGCAAACAGGATTAGATACCCTGGTAGTCCACGCCGTAAACGATGAGTGCTAGGTGTTGGGGGGTTCCACCCTCAGTGCTGAAGTTAACACATTAAGCACTCCGCCTGGGGAGTACGACCGCAAGGTTGAAACTCAAAGGAATTGACGGGGGCCCGCACAAGCAGTGGAGCATGTGGTTTAATTCGAAGCAACGCG…	PZ394945	99.9	737	Fictibacillus nanhaiensis	k__Bacteria	p__Firmicutes	c__Bacilli	o__Bacillales	f__Bacillaceae	g__Fictibacillus	s__nanhaiensis	2	0	0	0	Not tested	0	0	0
Son8cp3	3°51′43″N, 76°20′57″W; Sonso Lagoon natural park, Guadalajara de Buga, Valle del Cauca, Colombia	Sonso8	Root	TSA	TTGGGCGTAAAGCGCGCGCAGGCGGTCTCTTAAGTCTGATGTGAAAGCCCACGGCTCAACCGTGGAGGGTCATTGGAAACTGGGAGACTTGAGTGCAGGAGAGAAAAGTGGAATTCCACGTGTAGCGGTGAAATGCGTAGAGATGTGGAGGAACACCAGTGGCGAAGGCGGCTTTTTGGCCTGTAACTGACGCTGAGGCGCGAAAGCGTGGGGAGCAAACAGGATTAGATACCCTGGTAGTCCACGCCGTAAACGATGAGTGCTAGGTGTTGGGGGGTTCCACCCTCAGTGCTGAAGTTAACACATTAAGCACTCCGCCTGGGGAGTACGACCGCAAGGTTGAAACTCAAAGGAATTGACGGGGGCCCGCACAAGCAGTGGAGCATGTGGTTTAATTCG…	PZ394946	99	765	Fictibacillus nanhaiensis	k__Bacteria	p__Firmicutes	c__Bacilli	o__Bacillales	f__Bacillaceae	g__Fictibacillus	s__nanhaiensis	2	0	0	0	Not tested	0	0	0
Son9cp1	3°51′43″N, 76°20′57″W; Sonso Lagoon natural park, Guadalajara de Buga, Valle del Cauca, Colombia	Sonso9	Root	TSA	ATTATTGGGCGTAAAGCGCGCGCAGGCGGTCTCTTAAGTCTGATGTGAAAGCCCACGGCTCAACCGTGGAGGGTCATTGGAAACTGGGAGACTTGAGTGCAGGAGAGAAAAGTGGAATTCCACGTGTAGCGGTGAAATGCGTAGAGATGTGGAGGAACACCAGTGGCGAAGGCGGCTTTTTGGCCTGTAACTGACGCTGAGGCGCGAAAGCGTGGGGAGCAAACAGGATTAGATACCCTGGTAGTCCACGCCGTAAACGATGAGTGCTAGGTGTTGGGGGGTTCCACCCTCAGTGCTGAAGTTAACACATTAAGCACTCCGCCTGGGGAGTACGACCGCAAGGTTGAAACTCAAAGGAATTGACGGGGGCCCGCACAAGCAGTGGAGCATGTGGTTTAA…	PZ394947	99.6	752	Fictibacillus nanhaiensis	k__Bacteria	p__Firmicutes	c__Bacilli	o__Bacillales	f__Bacillaceae	g__Fictibacillus	s__nanhaiensis	0	0	0	0	Not tested	0	0	0
Son9cp2	3°51′43″N, 76°20′57″W; Sonso Lagoon natural park, Guadalajara de Buga, Valle del Cauca, Colombia	Sonso9	Root	TSA	CGCGCGCAGGTGGTTTCTTAAGTCTGATGTGAAAGCCCACGGCTCAACCGTGGAGGGTCATTGGAAACTGGGGAACTTGAGTGCAGAAGAGGAAAGTGGAATTCCAAGTGTAGCGGTGAAATGCGTAGATATTTGGAGGAACACCAGTGGCGAAGGCGACTTTCTGGTCTGTAACTGACACTGAGGCGCGAAAGCGTGGGGAGCAAACAGGATTAGATACCCTGGTAGTCCACGCCGTAAACGATGAGTGCTAAGTGTTAGAGGGTTTCCGCCCTTTAGTGCTGCAGCTAACGCATTAAGCACTCCGCCTGGGGAGTACGGTCGCAAGACTGAAACTCAAAGGAATTGACGGGGGCCCGCACAAGCGGTGGAGCATGTGGTTTAATTCGAAGCAACGCG…	PZ394948	100	737	Rossellomorea marisflavi	k__Bacteria	p__Firmicutes	c__Bacilli	o__Bacillales	f__Bacillaceae	g__Rossellomorea	s__marisflavi	1	0	0	0	Not tested	0	0	0
Son9cp3	3°51′43″N, 76°20′57″W; Sonso Lagoon natural park, Guadalajara de Buga, Valle del Cauca, Colombia	Sonso9	Root	TSA	TGGGCGTAAAGCGCGCGCAGGCGGTTCCTTAAGTCTGATGTGAAAGCCCACGGCTCAACCGTGGAGGGTCATTGGAAACTGGGGAACTTGAGTGCAGGAGAGAAAAGTGGAATTCCACGTGTAGCGGTGAAATGCGTAGAGATGTGGAGGAACACCAGTGGCGAAGGCGGCTTTTTGGCCTGTAACTGACGCTGAGGCGCGAAAGCGTGGGGAGCAAACAGGATTAGATACCCTGGTAGTCCACGCCGTAAACGATGAGTGCTAGGTGTTGGGGGGTTCCACCCTCAGTGCTGACGTTAACACATTAAGCACTCCGCCTGGGGAGTACGGCCGCAAGGCTGAAACTCAAAGGAATTGACGGGGGCCCGCACAAGCAGTGGAGCATGTGGTTTAATTCGA…	PZ394949	97	698	Fictibacillus rigui	k__Bacteria	p__Firmicutes	c__Bacilli	o__Bacillales	f__Bacillaceae	g__Fictibacillus	s__rigui	0	0	0	0	Not tested	0	0	0
Son9cp4	3°51′43″N, 76°20′57″W; Sonso Lagoon natural park, Guadalajara de Buga, Valle del Cauca, Colombia	Sonso9	Root	TSA	GCGCGCGCAGGTGGTTTCTTAAGTCTGATGTGAAAGCCCACGGCTCAACCGTGGAGGGTCATTGGAAACTGGGAAACTTGAGTGCAGAAGAGGAAAGTGGAATTCCATGTGTAGCGGTGAAATGCGTAGAGATATGGAGGAACACCAGTGGCGAAGGCGACTTTCTGGTCTGTAACTGACACTGAGGCGCGAAAGCGTGGGGAGCAAACAGGATTAGATACCCTGGTAGTCCACGCCGTAAACGATGAGTGCTAAGTGTTAGAGGGTTTCCGCCCTTTAGTGCTGAAGTTAACGCATTAAGCACTCCGCCTGGGGAGTACGGCCGCAAGGCTGAAACTCAAAGGAATTGACGGGGGCCCGCACAAGCGGTGGAGCATGTGGTTTAATTCGAAGCAACGC…	PZ394950	99.4	708	Bacillus anthracis	k__Bacteria	p__Firmicutes	c__Bacilli	o__Bacillales	f__Bacillaceae	g__Bacillus	s__anthracis	1	0	0	0	Not tested	0	0	0
Son9cp5	3°51′43″N, 76°20′57″W; Sonso Lagoon natural park, Guadalajara de Buga, Valle del Cauca, Colombia	Sonso9	Root	TSA	TATTGGGCGTAAAGCGCGCGCAGGCGGTTTCTTAAGTCTGATGTGAAAGCCCCCGGCTCAACCGGGGAGGGTCATTGGAAACTGGGAAACTTGAGTGCAGAAGAGGAAAGTGGAATTCCAAGTGTAGCGGTGAAATGCGTAGAGATTTGGAGGAACACCAGTGGCGAAGGCGACTTTCTGGTCTGTAACTGACGCTGAGGCGCGAAAGCGTGGGGAGCAAACAGGATTAGATACCCTGGTAGTCCACGCTGTAAACGATGAGTGCTAAGTGTTAGAGGGTTTCCGCCCTTTAGTGCTGAAGTTAACGCATTAAGCACTCCGCCTGGGGAGTACGGTCGCAAGACTGAAACTCAAAGGAATTGACGGGGGCCCGCACAAGTGGTGGAGCATGTGGTTTAA…	PZ394951	99.7	739	Gottfriedia endophytica	k__Bacteria	p__Firmicutes	c__Bacilli	o__Bacillales	f__Bacillaceae	g__Gottfriedia	s__endophytica	0	0	0	1	Not tested	0	0	0
Son9cp6	3°51′43″N, 76°20′57″W; Sonso Lagoon natural park, Guadalajara de Buga, Valle del Cauca, Colombia	Sonso9	Root	TSA	TGGGCGTAAAGCGCGCGCAGGCGGTTCCTTAAGTCTGATGTGAAAGCCCACGGCTCAACCGTGGAGGGTCATTGGAAACTGGGGAACTTGAGTGCAGGAGAGAAAAGTGGAATTCCACGTGTAGCGGTGAAATGCGTAGAGATGTGGAGGAACACCAGTGGCGAAGGCGGCTTTTTGGCCTGTAACTGACGCTGAGGCGCGAAAGCGTGGGGAGCAAACAGGATTAGATACCCTGGTAGTCCACGCCGTAAACGATGAGTGCTAGGTGTTGGGGGGTTCCACCCTCAGTGCTGACGTTAACACATTAAGCACTCCGCCTGGGGAGTACGGCCGCAAGGCTGAAACTCAAAGGAATTGACGGGGGCCCGCACAAGCAGTGGAGCATGTGGTTTAATTCGA…	PZ394952	99.6	746	Fictibacillus rigui	k__Bacteria	p__Firmicutes	c__Bacilli	o__Bacillales	f__Bacillaceae	g__Fictibacillus	s__rigui	0	0	1	0	Not tested	0	0	0
Son9cp7	3°51′43″N, 76°20′57″W; Sonso Lagoon natural park, Guadalajara de Buga, Valle del Cauca, Colombia	Sonso9	Root	TSA	TTGGGCGTAAAGCGCGCGCAGGCGGTTCCTTAAGTCTGATGTGAAAGCCCACGGCTCAACCGTGGAGGGTCATTGGAAACTGGGGAACTTGAGTGCAGGAGAGAAAAGTGGAATTCCACGTGTAGCGGTGAAATGCGTAGAGATGTGGAGGAACACCAGTGGCGAAGGCGGCTTTTTGGCCTGTAACTGACGCTGAGGCGCGAAAGCGTGGGGAGCAAACAGGATTAGATACCCTGGTAGTCCACGCCGTAAACGATGAGTGCTAGGTGTTGGGGGGTTCCACCCTCAGTGCTGACGTTAACACATTAAGCACTCCGCCTGGGGAGTACGGCCGCAAGGCTGAAACTCAAAGGAATTGACGGGGGCCCGCACAAGCAGTGGAGCATGTGGTTTAATTCG…	PZ394953	99.9	773	Fictibacillus rigui	k__Bacteria	p__Firmicutes	c__Bacilli	o__Bacillales	f__Bacillaceae	g__Fictibacillus	s__rigui	0	0	0	0	Not tested	0	0	0
Son9cp8	3°51′43″N, 76°20′57″W; Sonso Lagoon natural park, Guadalajara de Buga, Valle del Cauca, Colombia	Sonso9	Root	TSA	CGCGCGCAGGCGGTTCCTTAAGTCTGATGTGAAAGCCCACGGCTCAACCGTGGAGGGTCATTGGAAACTGGGGAACTTGAGTGCAGGAGAGAAAAGTGGAATTCCACGTGTAGCGGTGAAATGCGTAGAGATGTGGAGGAACACCAGTGGCGAAGGCGGCTTTTTGGCCTGTAACTGACGCTGAGGCGCGAAAGCGTGGGGAGCAAACAGGATTAGATACCCTGGTAGTCCACGCCGTAAACGATGAGTGCTAGGTGTTGGGGGGTTCCACCCTCAGTGCTGACGTTAACACATTAAGCACTCCGCCTGGGGAGTACGGCCGCAAGGCTGAAACTCAAAGGAATTGACGGGGGCCCGCACAAGCAGTGGAGCATGTGGTTTAATTCGAAGCAACGCGAA…	PZ394954	99.7	759	Fictibacillus rigui	k__Bacteria	p__Firmicutes	c__Bacilli	o__Bacillales	f__Bacillaceae	g__Fictibacillus	s__rigui	0	1	0	0	Not tested	0	0	0
Son9cp9	3°51′43″N, 76°20′57″W; Sonso Lagoon natural park, Guadalajara de Buga, Valle del Cauca, Colombia	Sonso9	Root	TSA	ATTGGGCGTAAGGGCTCGCAGGCGGTTTCTTAAGTCTGATGTGAAAGCCCCCGGCTCAACCGGGGAGGGTCATTGGAAACTGGGAAACTTGAGTGCAGAAGAGGAGAGTGGAATTCCACGTGTAGCGGTGAAATGCGTAGAGATGTGGAGGAACACCAGTGGCGAAGGCGACTCTCTGGTCTGTAACTGACGCTGAGGAGCGAAAGCGTGGGGAGCGAACAGGATTAGATACCCTGGTAGTCCACGCCGTAAACGATGAGTGCTAAGTGTTAGGGGGTTTCCGCCCCTTAGTGCTGCAGCTAACGCATTAAGCACTCCGCCTGGGGAGTACGGTCGCAAGACTGAAACTCAAAGGAATTGACGGGGGCCCGCACAAGCGGTGGAGCATGTGGTTTAATT…	PZ394955	99.9	741	Bacillus altitudinis	k__Bacteria	p__Firmicutes	c__Bacilli	o__Bacillales	f__Bacillaceae	g__Bacillus	s__altitudinis	0	0	0	0	Not tested	0	0	0
Son9cp10	3°51′43″N, 76°20′57″W; Sonso Lagoon natural park, Guadalajara de Buga, Valle del Cauca, Colombia	Sonso9	Root	TSA	GCGCGCAGGCGGTTTCTTAAGTCTGATGTGAAAGCCCCCGGCTCAACCGGGGAGGGTCATTGGAAACTGGGAAACTTGAGTGCAGAAGAGGAGAGTGGAATTCCACGTGTAGCGGTGAAATGCGTAGAGATGTGGAGGAACACCAGTGGCGAAGGCGACTCTCTGGTCTGTAACTGACGCTGAGGCGCGAAAGCGTGGGGAGCGAACAGGATTAGATACCCTGGTAGTCCACGCCGTAAACGATGAGTGCTAAGTGTTAGAGGGTTTCCGCCCTTTAGTGCTGCAGCTAACGCATTAAGCACTCCGCCTGGGGAGTACGGTCGCAAGACTGAAACTCAAAGGAATTGACGGGGGCCCGCACAAGCGGTGGAGCATGTGGTTTAATTCGAAGCAACGCGA…		100	716	Metabacillus idriensis	k__Bacteria	p__Firmicutes	c__Bacilli	o__Bacillales	f__Bacillaceae	g_Metabacillus	s__indicus	0	1	0	0	Not tested	0	0	0
Son9cp11	3°51′43″N, 76°20′57″W; Sonso Lagoon natural park, Guadalajara de Buga, Valle del Cauca, Colombia	Sonso9	Root	TSA	AGCGCGCGCAGGCGGTTTCTTAAGTCTGATGTGAAAGCCCCCGGCTCAACCGGGGAGGGTCATTGGAAACTGGGAAACTTGAGTGCAGAAGAGGAAAGTGGAATTCCAAGTGTAGCGGTGAAATGCGTAGAGATTTGGAGGAACACCAGTGGCGAAGGCGACTTTCTGGTCTGTAACTGACGCTGAGGCGCGAAAGCGTGGGGAGCAAACAGGATTAGATACCCTGGTAGTCCACGCTGTAAACGATGAGTGCTAAGTGTTAGAGGGTTTCCGCCCTTTAGTGCTGAAGTTAACGCATTAAGCACTCCGCCTGGGGAGTACGGTCGCAAGACTGAAACTCAAAGGAATTGACGGGGGCCCGCACAAGTGGTGGAGCATGTGGTTTAATTCGAAGCAACG…		100	542	Gottfriedia luciferensis	k__Bacteria	p__Firmicutes	c__Bacilli	o__Bacillales	f__Bacillaceae	g__Gottfriedia	s__luciferensis	0	0	0	1	Not tested	0	0	0
Son10cp1	3°51′43″N, 76°20′57″W; Sonso Lagoon natural park, Guadalajara de Buga, Valle del Cauca, Colombia	Sonso10	Root	TSA	TTGGGCGTAAAGCGCGCGCAGGTGGTTTCTTAAGTCTGATGTGAAAGCCCACGGCTCAACCGTGGAGGGTCATTGGAAACTGGGGAACTTGAGTGCAGAAGAGGAAAGTGGAATTCCAAGTGTAGCGGTGAAATGCGTAGATATTTGGAGGAACACCAGTGGCGAAGGCGACTTTCTGGTCTGTAACTGACACTGAGGCGCGAAAGCGTGGGGAGCAAACAGGATTAGATACCCTGGTAGTCCACGCCGTAAACGATGAGTGCTAAGTGTTAGAGGGTTTCCGCCCTTTAGTGCTGCAGCTAACGCATTAAGCACTCCGCCTGGGGAGTACGGTCGCAAGACTGAAACTCAAAGGAATTGACGGGGGCCCGCACAAGCGGTGGAGCATGTGGTTTAATT…		100	748	Rossellomorea marisflavi	k__Bacteria	p__Firmicutes	c__Bacilli	o__Bacillales	f__Bacillaceae	g__Rossellomorea	s__marisflavi	0	0	0	0	Not tested	0	0	0
Son10cp2	3°51′43″N, 76°20′57″W; Sonso Lagoon natural park, Guadalajara de Buga, Valle del Cauca, Colombia	Sonso10	Root	TSA	AGCGCGCGCAGGCGGTTCCTTAAGTCTGATGTGAAAGCCCACGGCTCAACCGTGGAGGGTCATTGGAAACTGGGGAACTTGAGTGCAGGAGAGAAAAGTGGAATTCCACGTGTAGCGGTGAAATGCGTAGAGATGTGGAGGAACACCAGTGGCGAAGGCGGCTTTTTGGCCTGTAACTGACGCTGAGGCGCGAAAGCGTGGGGAGCAAACAGGATTAGATACCCTGGTAGTCCACGCCGTAAACGATGAGTGCTAGGTGTTGGGGGGTTCCACCCTCAGTGCTGACGTTAACACATTAAGCACTCCGCCTGGGGAGTACGGCCGCAAGGCTGAAACTCAAAGGAATTGACGGGGGCCCGCACAAGCAGTGGAGCATGTGGTTTAATTCGAAGCAACGCG…		99.7	731	Fictibacillus rigui	k__Bacteria	p__Firmicutes	c__Bacilli	o__Bacillales	f__Bacillaceae	g__Fictibacillus	s__rigui	1	0	0	0	Not tested	0	0	0
Son11cp1	3°51′43″N, 76°20′57″W; Sonso Lagoon natural park, Guadalajara de Buga, Valle del Cauca, Colombia	Sonso11	Root	TSA	ATTGGGCGTAAAGCGCGCGCAGGTGGTTTCTTAAGTCTGATGTGAAAGCCCACGGCTCAACCGTGGAGGGTCATTGGAAACTGGGGAACTTGAGTGCAGAAGAGGAAAGTGGAATTCCAAGTGTAGCGGTGAAATGCGTAGATATTTGGAGGAACACCAGTGGCGAAGGCGACTTTCTGGTCTGTAACTGACACTGAGGCGCGAAAGCGTGGGGAGCAAACAGGATTAGATACCCTGGTAGTCCACGCCGTAAACGATGAGTGCTAAGTGTTAGAGGGTTTCCGCCCTTTAGTGCTGCAGCTAACGCATTAAGCACTCCGCCTGGGGAGTACGGTCGCAAGACTGAAACTCAAAGGAATTGACGGGGGCCCGCACAAGCGGTGGAGCATGTGGTTTAAT…		100	750	Rossellomorea marisflavi	k__Bacteria	p__Firmicutes	c__Bacilli	o__Bacillales	f__Bacillaceae	g__Rossellomorea	s__marisflavi	0	0	0	0	Not tested	0	0	0
Son11cp2	3°51′43″N, 76°20′57″W; Sonso Lagoon natural park, Guadalajara de Buga, Valle del Cauca, Colombia	Sonso11	Root	TSA	TATTGGGCGTAAAGCGCGCGCAGGTGGTTCCTTAAGTCTGATGTGAAAGCCCACGGCTCAACCGTGGAGGGTCATTGGAAACTGGGGAACTTGAGTGCAGAAGAGGAAAGTGGAATTCCAAGTGTAGCGGTGAAATGCGTAGATATTTGGAGGAACACCAGTGGCGAAGGCGACTTTCTGGTCTGTAACTGACACTGAGGCGCGAAAGCGTGGGGAGCAAACAGGATTAGATACCCTGGTAGTCCACGCCGTAAACGATGAGTGCTAAGTGTTAGGGGGTTTCCGCCCCTTAGTGCTGCAGCTAACGCATTAAGCACTCCGCCTGGGGAGTACGGTCGCAAGACTGAAACTCAAAGGAATTGACGGGGGCCCGCACAAGCGGTGGAGCATGTGGTTTAA…		100	776	Rossellomorea vietnamensis	k__Bacteria	p__Firmicutes	c__Bacilli	o__Bacillales	f__Bacillaceae	g__Rossellomorea	s__vietnamensis	0	0	0	0	Not tested	0	0	0
Son11cp3	3°51′43″N, 76°20′57″W; Sonso Lagoon natural park, Guadalajara de Buga, Valle del Cauca, Colombia	Sonso11	Root	TSA	GGGCGTAAGCGCGCGCAGGCGGTCCTTTAAGTCTGATGTGAAAGCCCACGGCTCAACCGTGGAGGGTCATTGGAAACTGGGGGACTTGAGTGCAGAAGAGGAAAGCGGAATTCCACGTGTAGCGGTGAAATGCGTAGAGATGTGGAGGAACACCAGTGGCGAAGGCGGCTTTCTGGTCTGTAACTGACGCTGAGGCGCGAAAGCGTGGGGAGCAAACAGGATTAGATACCCTGGTAGTCCACGCCGTAAACGATGAGTGCTAAGTGTTAGAGGGTTTCCGCCCTTTAGTGCTGCAGCTAACGCATTAAGCACTCCGCCTGGGGAGTACGGCCGCAAGGCTGAAACTCAAAGGAATTGACGGGGGCCCGCACAAGCGGTGGAGCATGTGGTTTAATTCGA…		96.6	560	Neobacillus endophyticus	k__Bacteria	p__Firmicutes	c__Bacilli	o__Bacillales	f__Bacillaceae	g__Neobacillus	s__endophyticus	0	0	1	0	Not tested	0	0	0
Son11cp4	3°51′43″N, 76°20′57″W; Sonso Lagoon natural park, Guadalajara de Buga, Valle del Cauca, Colombia	Sonso11	Root	TSA	TTGGGCGTAAAGCGCGCGCAGGCGGTTTCTTAAGTCTGATGTGAAAGCCCCCGGCTCAACCGGGGAGGGTCATTGGAAACTGGGAAACTTGAGTGCAGAAGAGGAAAGTGGAATTCCAAGTGTAGCGGTGAAATGCGTAGAGATTTGGAGGAACACCAGTGGCGAAGGCGACTTTCTGGTCTGTAACTGACGCTGAGGCGCGAAAGCGTGGGGAGCAAACAGGATTAGATACCCTGGTAGTCCACGCTGTAAACGATGAGTGCTAAGTGTTAGAGGGTTTCCGCCCTTTAGTGCTGAAGTTAACGCATTAAGCACTCCGCCTGGGGAGTACGGTCGCAAGACTGAAACTCAAAGGAATTGACGGGGGCCCGCACAAGTGGTGGAGCATGTGGTTTAATT…		99.6	679	Gottfriedia endophytica	k__Bacteria	p__Firmicutes	c__Bacilli	o__Bacillales	f__Bacillaceae	g__Gottfriedia	s__endophytica	0	0	0	0	Not tested	0	0	0
Son11cp5	3°51′43″N, 76°20′57″W; Sonso Lagoon natural park, Guadalajara de Buga, Valle del Cauca, Colombia	Sonso11	Root	TSA	CGCGCGCAGGTGGTTCCTTAAGTCTGATGTGAAAGCCCCCGGCTCAACCGGGGAGGGTCATTGGAAACTGGGGAACTTGAGTGCAGGAGAGGAAAGTGGAATTCCACGTGTAGCGGTGAAATGCGTAGATATGTGGAGGAACACCAGTGGCGAAGGCGACTTTCTGGCCTGTAACTGACACTGAGGCGCGAAAGCGTGGGGAGCAAACAGGATTAGATACCCTGGTAGTCCACGCCGTAAACGATGAGTGCTAAGTGTTGGGGGGTTTCCGCCCCTCAGTGCTGCAGCTAACGCATTAAGCACTCCGCCTGGGGAGTACGGCCGCAAGGCTGAAACTCAAAGGAATTGACGGGGGCCCGCACAAGCGGTGGAGCATGTGGTTTAATTCGAAGCAACGCG…		100	737	Jeotgalibacillus campisalis	k__Bacteria	p__Firmicutes	c__Bacilli	o__Bacillales	f__Planococcaceae	g__Jeotgalibacillus	s__campisalis	0	1	0	0	Not tested	0	0	0
Son11cp6	3°51′43″N, 76°20′57″W; Sonso Lagoon natural park, Guadalajara de Buga, Valle del Cauca, Colombia	Sonso11	Root	TSA	GCGCGCAGGCGGCCTTTTAAGTCTGATGTGAAATCTTGCGGCTCAACCGCAAGCGGCCATTGGAAACTGGGAGGCTTGAGTACAGAAGAGGAGAGTGGAATTCCACGTGTAGCGGTGAAATGCGTAGATATGTGGAGGAACACCAGTGGCGAAGGCGACTCTCTGGTCTGTAACTGACGCTGAGGCGCGAAAGCGTGGGGAGCAAACAGGATTAGATACCCTGGTAGTCCACGCCGTAAACGATGAGTGCTAGGTGTTAGGGGTTTCGATGCCCGTAGTGCCGAAGTTAACACATTAAGCACTCCGCCTGGGGAGTACGGCCGCAAGGCTGAAACTCAAAGGAATTGACGGGGGCCCGCACAAGCAGTGGAGCATGTGGTTTAATTCGAAGCAACGCGA…		99.7	756	Bacillus gibsonii	k__Bacteria	p__Firmicutes	c__Bacilli	o__Bacillales	f__Bacillaceae	g__Bacillus	s__gibsonii	0	0	0	0	Not tested	0	0	0
Son11cp7	3°51′43″N, 76°20′57″W; Sonso Lagoon natural park, Guadalajara de Buga, Valle del Cauca, Colombia	Sonso11	Root	TSA	CGCGCGCAGGCGGTCTCTTAAGTCTGATGTGAAAGCCCACGGCTCAACCGTGGAGGGTCATTGGAAACTGGGAGACTTGAGTGCAGGAGAGAAAAGTGGAATTCCACGTGTAGCGGTGAAATGCGTAGAGATGTGGAGGAACACCAGTGGCGAAGGCGGCTTTTTGGCCTGTAACTGACGCTGAGGCGCGAAAGCGTGGGGAGCAAACAGGATTAGATACCCTGGTAGTCCACGCCGTAAACGATGAGTGCTAGGTGTTGGGGGGTTCCACCCTCAGTGCTGAAGTTAACACATTAAGCACTCCGCCTGGGGAGTACGACCGCAAGGTTGAAACTCAAAGGAATTGACGGGGGCCCGCACAAGCAGTGGAGCATGTGGTTTAATTCGAAGCAACGCGAA…		99.2	718	Fictibacillus phosphorivorans	k__Bacteria	p__Firmicutes	c__Bacilli	o__Bacillales	f__Bacillaceae	g__Fictibacillus	s__phosphorivorans	0	0	0	0	Not tested	0	0	0
Son11cp8	3°51′43″N, 76°20′57″W; Sonso Lagoon natural park, Guadalajara de Buga, Valle del Cauca, Colombia	Sonso11	Root	TSA	TTGGGCGTAAAGCGCGCGCAGGCGGTTCCTTAAGTCTGATGTGAAAGCCCACGGCTCAACCGTGGAGGGTCATTGGAAACTGGGGAACTTGAGTGCAGGAGAGAAAAGTGGAATTCCACGTGTAGCGGTGAAATGCGTAGAGATGTGGAGGAACACCAGTGGCGAAGGCGGCTTTTTGGCCTGTAACTGACGCTGAGGCGCGAAAGCGTGGGGAGCAAACAGGATTAGATACCCTGGTAGTCCACGCCGTAAACGATGAGTGCTAGGTGTTGGGGGGTTCCACCCTCAGTGCTGACGTTAACACATTAAGCACTCCGCCTGGGGAGTACGGCCGCAAGGCTGAAACTCAAAGGAATTGACGGGGGCCCGCACAAGCAGTGGAGCATGTGGTTTAATTCG…		99.7	748	Fictibacillus rigui	k__Bacteria	p__Firmicutes	c__Bacilli	o__Bacillales	f__Bacillaceae	g__Fictibacillus	s__rigui	0	0	0	1	Not tested	0	0	0
Son11cp9	3°51′43″N, 76°20′57″W; Sonso Lagoon natural park, Guadalajara de Buga, Valle del Cauca, Colombia	Sonso11	Root	TSA	ATTATTGGGCGTAAAGCGCGCGCAGGCGGTTCCTTAAGTCTGATGTGAAAGCCCACGGCTCAACCGTGGAGGGTCATTGGAAACTGGGGAACTTGAGTGCAGAAGAGAAGAGCGGAATTCCACGTGTAGCGGTGAAATGCGTAGAGATGTGGAGGAACACCAGTGGCGAAGGCGGCTCTTTGGTCTGTAACTGACGCTGAGGCGCGAAAGCGTGGGGAGCAAACAGGATTAGATACCCTGGTAGTCCACGCCGTAAACGATGAGTGCTAAGTGTTAGAGGGTTTCCGCCCTTTAGTGCTGCAGCTAACGCATTAAGCACTCCGCCTGGGGAGTACGGCCGCAAGGCTGAAACTCAAAGGAATTGACGGGGGCCCGCACAAGCGGTGGAGCATGTGGTTT…		99.9	753	Falsibacillus pallidus	k__Bacteria	p__Firmicutes	c__Bacilli	o__Bacillales	f__Bacillaceae	g__Falsibacillus	s__pallidus	0	0	0	0	Not tested	0	0	0
Son12cp1	3°51′43″N, 76°20′57″W; Sonso Lagoon natural park, Guadalajara de Buga, Valle del Cauca, Colombia	Sonso12	Root	TSA	GCGCGCGCAGGCGGTTTCTTAAGTCTGATGTGAAAGCCCCCGGCTCAACCGGGGAGGGTCATTGGAAACTGGGAAACTTGAGTGCAGAAGAGGAAAGTGGAATTCCAAGTGTAGCGGTGAAATGCGTAGAGATTTGGAGGAACACCAGTGGCGAAGGCGACTTTCTGGTCTGTAACTGACGCTGAGGCGCGAAAGCGTGGGGAGCAAACAGGATTAGATACCCTGGTAGTCCACGCTGTAAACGATGAGTGCTAAGTGTTAGAGGGTTTCCGCCCTTTAGTGCTGAAGTTAACGCATTAAGCACTCCGCCTGGGGAGTACGGTCGCAAGACTGAAACTCAAAGGAATTGACGGGGGCCCGCACAAGTGGTGGAGCATGTGGTTTAATTCGAAGCAACGC…		99.7	699	Gottfriedia endophytica	k__Bacteria	p__Firmicutes	c__Bacilli	o__Bacillales	f__Bacillaceae	g__Gottfriedia	s__endophytica	0	0	0	0	Not tested	0	0	0
Son12cp2	3°51′43″N, 76°20′57″W; Sonso Lagoon natural park, Guadalajara de Buga, Valle del Cauca, Colombia	Sonso12	Root	TSA	AGCGCGCGCAGGCGGTCTCTTAAGTCTGATGTGAAAGCCCACGGCTCAACCGTGGAGGGTCATTGGAAACTGGGAGACTTGAGTGCAGGAGAGAAAAGTGGAATTCCACGTGTAGCGGTGAAATGCGTAGAGATGTGGAGGAACACCAGTGGCGAAGGCGGCTTTTTGGCCTGTAACTGACGCTGAGGCGCGAAAGCGTGGGGAGCAAACAGGATTAGATACCCTGGTAGTCCACGCCGTAAACGATGAGTGCTAGGTGTTGGGGGGTTCCACCCTCAGTGCTGAAGTTAACACATTAAGCACTCCGCCTGGGGAGTACGACCGCAAGGTTGAAACTCAAAGGAATTGACGGGGGCCCGCACAAGCAGTGGAGCATGTGGTTTAATTCGAAGCAACGCG…		99.4	705	Fictibacillus nanhaiensis	k__Bacteria	p__Firmicutes	c__Bacilli	o__Bacillales	f__Bacillaceae	g__Fictibacillus	s__nanhaiensis	2	2	2	2	Not tested	0	2	1
Son12cp3	3°51′43″N, 76°20′57″W; Sonso Lagoon natural park, Guadalajara de Buga, Valle del Cauca, Colombia	Sonso12	Root	TSA	TTGGGCGTAAAGCGCGCGCAGGCGGCTATGTAAGTCTGGTGTTAAAGCCCGGAGCTCAACTCCGGTTCGCATCGGAAACTGTGTAGCTTGAGTGCAGAAGAGGAAAGCGGTATTCCACGTGTAGCGGTGAAATGCGTAGAGATGTGGAGGAACACCAGTGGCGAAGGCGGCTTTCTGGTCTGTAACTGACGCTGAGGCGCGAAAGCGTGGGGAGCAAACAGGATTAGATACCCTGGTAGTCCACGCCGTAAACGATGAGTGCTAGGTGTTGGGGGTTTCAATACCCTCAGTGCCGCAGCTAACGCAATAAGCACTCCGCCTGGGGAGTACGCTCGCAAGAGTGAAACTCAAAGGAATTGACGGGGGCCCGCACAAGCGGTGGAGCATGTGGTTTAATTC…		99.9	751	Brevibacillus brevis	k__Bacteria	p__Firmicutes	c__Bacilli	o__Brevibacillales	f__Brevibacillaceae	g__Brevibacillus	s__brevis	0	0	0	0	Not tested	0	0	0
Son12cp4	3°51′43″N, 76°20′57″W; Sonso Lagoon natural park, Guadalajara de Buga, Valle del Cauca, Colombia	Sonso12	Root	TSA	TGGGCGTAAAGCGCGCGCAGGCGGCTAATTAAGTCTGGTGTTTAACCTTGGGGCTCAACCCCGAGTCGCACTGGAAACTGGTTGGCTTGAGTGCAGAAGAGGAAAGTGGAATTCCACGTGTAGCGGTGAAATGCGTAGAGATGTGGAGGAACACCAGTGGCGAAGGCGACTTTCTGGGCTGTAACTGACGCTGAGGCGCGAAAGCGTGGGGAGCAAACAGGATTAGATACCCTGGTAGTCCACGCCGTAAACGATGAATGCTAGGTGTTAGGGGTTTCGATACCCTTGGTGCCGAAGTTAACACATTAAGCATTCCGCCTGGGGAGTACGGTCGCAAGACTGAAACTCAAAGGAATTGACGGGGACCCGCACAAGCAGTGGAGTATGTGGTTTAATTCG…		99.2	732	Paenibacillus harenae	k__Bacteria	p__Firmicutes	c__Bacilli	o__Paenibacillales	f__Paenibacillaceae	g__Paenibacillus	s__harenae	0	0	0	0	Not tested	0	0	0
Son12cp5	3°51′43″N, 76°20′57″W; Sonso Lagoon natural park, Guadalajara de Buga, Valle del Cauca, Colombia	Sonso12	Root	TSA	TTGGGCGTAAAGCGCGCGCAGGCGGTTTCTTAAGTCTGATGTGAAAGCCCCCGGCTCAACCGGGGAGGGTCATTGGAAACTGGGAAACTTGAGTGCAGAAGAGGAAAGTGGAATTCCAAGTGTAGCGGTGAAATGCGTAGAGATTTGGAGGAACACCAGTGGCGAAGGCGACTTTCTGGTCTGTAACTGACGCTGAGGCGCGAAAGCGTGGGGAGCAAACAGGATTAGATACCCTGGTAGTCCACGCTGTAAACGATGAGTGCTAAGTGTTAGAGGGTTTCCGCCCTTTAGTGCTGAAGTTAACGCATTAAGCACTCCGCCTGGGGAGTACGGTCGCAAGACTGAAACTCAAAGGAATTGACGGGGGCCCGCACAAGTGGTGGAGCATGTGGTTTAATT…		99.7	708	Gottfriedia endophytica	k__Bacteria	p__Firmicutes	c__Bacilli	o__Bacillales	f__Bacillaceae	g__Gottfriedia	s__endophytica	0	0	0	0	Not tested	0	0	0
AG01	3°49'07.6"N 77°01'58.5"W; Campo hermoso mangrove, Buenaventura, Valle del Cauca, Colombia	Avicennia germinans	Stem	TSA	TTGCTCCCTGAGATTAGCGGCGGACGGGTGAGTAACACGTGGGCAACCTGCCTATAAGACTGGGATAACTTCGGGAAACCGGAGCTAATACCGGATACGTTCTTTTCTCGCATGAGAGAAGATGGAAAGACGGTTTACGCTGTCACTTATAGATGGGCCCGCGGCGCATTAGCTAGTTGGTGAGGTAATGGCTCACCAAGGCGACGATGCGTAGCCGACCTGAGAGGGTGATCGGCCACACTGGGACTGAGACACGGCCCAGACTCCTACGGGAGGCAGCAGTAGGGAATCTTCCGCAATGGACGAAAGTCTGACGGAGCAACGCCGCGTGAACGAAGAAGGCCTTCGGGTCGTAAAGTTCTGTTGTTAGGGAAGAACAAGTACCAGAGTAACTGCTGG…	PZ394974	100	570	Peribacillus frigoritolerans	k__Bacteria	p__Firmicutes	c__Bacilli	o__Bacillales	f__Bacillaceae	g__Peribacillus	s__frigoritolerans	Not tested	Not tested	Not tested	Not tested	0	0	0	0
AG02	3°49'07.6"N 77°01'58.5"W; Campo hermoso mangrove, Buenaventura, Valle del Cauca, Colombia	Avicennia germinans	Stem	TSA	CCAAGGCGACCATACATAACCAACCTGAAAGGGTGATCGGCCACACTGGGACTGATACACGGCCCAGACTCCTAGGGGAGGCATCAATAGGGAATCTTCCACAATGGGCGAAATCCTGATGGAGCAACGCCGGGTGAGTGAATAAGGATTTCTGTT	PZ394975	100	156	Lysinibacillus fusiformis	k__Bacteria	p__Firmicutes	c__Bacilli	o__Bacillales	f__Planococcaceae	g__Lysinibacillus	s__fusiformis	Not tested	Not tested	Not tested	Not tested	0	0	0	0
AG03	3°49'07.6"N 77°01'58.5"W; Campo hermoso mangrove, Buenaventura, Valle del Cauca, Colombia	Avicennia germinans	Stem	TSA	CGAACGGGTGAGTAACACGTGGGTGATCTGCCCTGCACTCTGGGATAAGCTTGGGAAACTGGGTCTAATACCGGATATGACCACAGCATGCATGTGTTGTGGTGGAAAGATTTATCGGTGCAGGATGGGCCCGCGGCCTATCAGCTTGTTGGTGGGGTAATGGCCTACCAAGGCGACGACGGGTAGCCGACCTGAGAGGGTGACCGGCCACACTGGGACTGAGACACGGCCCAGACTCCTACGGGAGGCAGCAGTGGGGAATATTGCACAATGGGCGGAAGCCTGATGCAGCGACGCCGCGTGAGGGATGAAGGCCTTCGGGTTGTAAACCTCTTTCAGCAGGGACGAAGCGTGAGTGACGGTACCTGCAGAAGAAGCACC	PZ394976	100	381	Rhodococcus fascians	k__Bacteria	p__Actinobacteriota	c__Actinobacteria	o__Corynebacteriales	f__Nocardiaceae	g__Rhodococcus	s__fascians	Not tested	Not tested	Not tested	Not tested	0	0	0	0
AG04	3°49'07.6"N 77°01'58.5"W; Campo hermoso mangrove, Buenaventura, Valle del Cauca, Colombia	Avicennia germinans	Rhizosphere	TSA	GTCGACGGAATGAGCGGCGGACGGGTGAGTAACACGTAAAGAACCTGCCCTCAGGTCTGGGATAACCACGAGAAATCGGGGCTAATACCGGATGGGTCATCGGACCGCATGGTCCGAGGATGAAAGGCGCTCCGGCGTCGCCTGGGGATGGCTTTGCGGTGCATTAGCTAGTTGGTGGGGTAATGGCCCACCAAGGCGACGATGCATAGCCGACCTGAGAGGGTGATCGGCCACACTGGGACTGAGACACGGCCCAGACTCCTACGGGAGGCAGCAGTAGGGAATCTTCCACAATGGACGAAACTCTGATGGAGCAACGCCGCGTGAACGATGAAGGCCTTCGGGTCGTAAAGTTCTGTTGTATGGGAAGAACAAGTGCCGCAGGCAATGGCGGCACCT…	PZ394977	97.2	977	Exiguobacterium aquaticum	k__Bacteria	p__Firmicutes	c__Bacilli	o__Bacillales	f__Bacillales_Incertae Sedis XII	g__Exiguobacterium	s__aquaticum	Not tested	Not tested	Not tested	Not tested	0	0	0	0
AG06	3°49'07.6"N 77°01'58.5"W; Campo hermoso mangrove, Buenaventura, Valle del Cauca, Colombia	Avicennia germinans	Rhizosphere	TSA	GCCGGCGAGCGGCGGACGGGTGAGTAATGCCTGGGAAATTGCCCAGTCGAGGGGGATAACAGTTGGAAACGACTGCTAATACCGCATACGCCCTACGGGGGAAAGCAGGGGACCTTCGGGCCTTGCGCGATTGGATATGCCCAGGTGGGATTAGCTAGTTGGTGAGGTAATGGCTCACCAAGGCGACGATCCCTAGCTGGTCTGAGAGGATGATCAGCCACACTGGAACTGAGACACGGTCCAGACTCCTACGGGAGGCAGCAGTGGGGAATATTGCACAATGGGGGAAACCCTGATGCAGCCATGCCGCGTGTGTGAAGAAGGCCTTCGGGTTGTAAAGCACTTTCAGCGAGGAGGAAAGGTCAGTAGCTAATATCTGCTGACTGTGACGTTACTCGC…	PZ394978	99.4	681	Aeromonas caviae	k__Bacteria	p__Proteobacteria	c__Gammaproteobacteria	o__Aeromonadales	f__Aeromonadaceae	g__Aeromonas	s__caviae	Not tested	Not tested	Not tested	Not tested	1	0	0	0
AG07	3°49'07.6"N 77°01'58.5"W; Campo hermoso mangrove, Buenaventura, Valle del Cauca, Colombia	Avicennia germinans	Rhizosphere	TSA	CCTTCGGGGGATTTGTTGGGCGGCGAGCGGCGGACGGGTGAGTAATGCCTGGGAAATTGCCCTGATGTGGGGGATAACCATTGGAAACGATGGCTAATACCGCATGATAGCTTCGGCTCAAAGAGGGGGACCTTCGGGCCTCTCGCGTCAGGATATGCCCAGGTGGGATTAGCTAGTTGGTGAGGTAAGGGCTCACCAAGGCGACGATCCCTAGCTGGTCTGAGAGGATGATCAGCCACACTGGAACTGAGACACGGTCCAGACTCCTACGGGAGGCAGCAGTGGGGAATATTGCACAATGGGCGCAAGCCTGATGCAGCCATGCCGCGTGTATGAAGAAGGCCTTCGGGTTGTAAAGTACTTTCAGCAGTGAGGAAGGGGGTATCGTTAATAGCGGTA…	PZ394979	99.3	737	Vibrio fluvialis	k__Bacteria	p__Proteobacteria	c__Gammaproteobacteria	o__Vibrionales	f__Vibrionaceae	g__Vibrio	s__fluvialis	Not tested	Not tested	Not tested	Not tested	0	0	0	0
AG08	3°49'07.6"N 77°01'58.5"W; Campo hermoso mangrove, Buenaventura, Valle del Cauca, Colombia	Avicennia germinans	Rhizosphere	TSA	GGTGGCGAGCGGCGGACGGGTGAGTAATGCCTAGGGATCTGCCCAGTCGAGGGGGATAACAGTTGGAAACGACTGCTAATACCGCATACGCCCTACGGGGGAAAGAGGGGGACTTTCGGGCCTCTCGCGATTGGATGAACCTAGGTGGGATTAGCTAGTTGGTGAGGTAATGGCTCACCAAGGCGACGATCCCTAGCTGTTCTGAGAGGATGATCAGCCACACTGGGACTGAGACACGGCCCAGACTCCTACGGGAGGCAGCAGTGGGGAATATTGCACAATGGGGGAAACCCTGATGCAGCCATGCCGCGTGTGTGAAGAAGGCCTTCGGGTTGTAAAGCACTTTCAGTAGGGAGGAAAGGTTGTAAGTTAATACCTTGCAGCTGTGACGTTACCTAC…	PZ394980	99.3	802	Shewanella seohaensis	k__Bacteria	p__Proteobacteria	c__Gammaproteobacteria	o__Alteromonadales	f__Shewanellaceae	g__Shewanella	s__seohaensis	Not tested	Not tested	Not tested	Not tested	0	0	0	0
AG09	3°49'07.6"N 77°01'58.5"W; Campo hermoso mangrove, Buenaventura, Valle del Cauca, Colombia	Avicennia germinans	Rhizosphere	TSA	ATTGAACCTTCGGGGGATTTGTTGGGCGGCGAGCGGCGGACGGGTGAGTAATGCCTGGGAAATTGCCCTGATGTGGGGGATAACCATTGGAAACGATGGCTAATACCGCATGATAGCTTCGGCTCAAAGAGGGGGACCTTCGGGCCTCTCGCGTCAGGATATGCCCAGGTGGGATTAGCTAGTTGGTGAGGTAAGGGCTCACCAAGGCGACGATCCCTAGCTGGTCTGAGAGGATGATCAGCCACACTGGAACTGAGACACGGTCCAGACTCCTACGGGAGGCAGCAGTGGGGAATATTGCACAATGGGCGCAAGCCTGATGCAGCC	PZ394981	94.5	327	Vibrio furnissii	k__Bacteria	p__Proteobacteria	c__Gammaproteobacteria	o__Vibrionales	f__Vibrionaceae	g__Vibrio	s__furnissii	Not tested	Not tested	Not tested	Not tested	0	0	0	0
AG10	3°49'07.6"N 77°01'58.5"W; Campo hermoso mangrove, Buenaventura, Valle del Cauca, Colombia	Avicennia germinans	Rhizosphere	TSA	ATTAGCTAGTTGGTGAGGTAATGGCTCACCAAGGCGACGATGCGTAGCCGACCTGAGAGGGTGATCGGCCACACTGGGACTGAGACACGGCCCAGACTCCTACGGGAGGCAGCAGTAGGGAATCTTCCGCAATGGACGAAAGTCTGACGGAGCAACGCCGCGTGAACGAAGAAGGCCTTCGGGTCGTAAAGTTCTGTTGTTAGGGAAGAACAAGTACCAGAGTAACTGCTGGTACCTTGACGGTACCTAACCAGAAAGCCACGGCTAACTAC	PZ394982	100	272	Peribacillus frigoritolerans	k__Bacteria	p__Firmicutes	c__Bacilli	o__Bacillales	f__Bacillaceae	g__Peribacillus	s__frigoritolerans	Not tested	Not tested	Not tested	Not tested	0	0	0	0
AG13	3°49'07.6"N 77°01'58.5"W; Campo hermoso mangrove, Buenaventura, Valle del Cauca, Colombia	Avicennia germinans	Rhizosphere	TSA	GAGCGGCGGACGGGTGAGTAATGCCTGGGAAATTGCCCAGTCGAGGGGGATAACAGTTGGAAACGACTGCTAATACCGCATACGCCCTACGGGGGAAAGCAGGGGACCTTCGGGCCTTGCGCGATTGGATATGCCCAGGTGGGATTAGCTAGTTGGTGAGGTAATGGCTCACCAAGGCGACGATCCCTAGCTGGTCTGAGAGGATGATCAGCCACACTGGAACTGAGACACGGTCCAGACTCCTACGGGAGGCAGCAGTGGGGAATATTGCACAATGGGGGAAACCCTGATGCAGCCATGCCGCGTGTGTGAAGAAGGCCTTCGGGTTGTAAAGCACTTTCAGCGAGGAGGAAAGGTCAGTAGCTAATATCTGCTGACTGTGACGTTACTCGCAGAAGA…	PZ394983	99.5	1167	Aeromonas taiwanensis	k__Bacteria	p__Proteobacteria	c__Gammaproteobacteria	o__Aeromonadales	f__Aeromonadaceae	g__Aeromonas	s__taiwanensis	Not tested	Not tested	Not tested	Not tested	0	0	0	0
AG14	3°49'07.6"N 77°01'58.5"W; Campo hermoso mangrove, Buenaventura, Valle del Cauca, Colombia	Avicennia germinans	Rhizosphere	TSA	CGACTTCACGGGGTCGAGTTGCAGACCCCGATCCGAACTGAGACCGGCTTTGCAGGGATTCGCTCCACCTCACGGCTTCGCAGCCCTTTGTACCGGCCATT		100	101	Mycobacterium thermoresistibile	k__Bacteria	p__Actinobacteria	c__Actinobacteria	o__Mycobacteriales	f__Mycobacteriaceae	g__Mycobacterium	s__thermoresistibile	Not tested	Not tested	Not tested	Not tested	0	0	0	0
AG15	3°49'07.6"N 77°01'58.5"W; Campo hermoso mangrove, Buenaventura, Valle del Cauca, Colombia	Avicennia germinans	Rhizosphere	TSA	GATTCAGCGGCGGACGGGTGAGTAATGCCTAGGAATCTGCCTGGTAGTGGGGGACAACGTTTCGAAAGGAACGCTAATACCGCATACGTCCTACGGGAGAAAGCAGGGGACCTTCGGGCCTTGCGCTATCAGATGAGCCTAGGTCGGATTAGCTAGTTGGTGGGGTAATGGCTCACCAAGGCGACGATCCGTAACTGGTCTGAGAGGATGATCAGTCACACTGGAACTGAGACACGGTCCAGACTCCTACGGGAGGCAGCAGTGGGGAATATTGGACAATGGGCGAAAGCCTGATCCAGCCATGCCGCGTGTGTGAAGAAGGTCTTCGGATTGTAAAGCACTTTAAGTTGGGAGGAAGGGCAGTAAGCTAATACCTTGCTGTTTTGACGTTACCGACAG…	PZ394984	98.1	539	Pseudomonas putida	k__Bacteria	p__Proteobacteria	c__Gammaproteobacteria	o__Pseudomonadales	f__Pseudomonadaceae	g__Pseudomonas	s__putida	Not tested	Not tested	Not tested	Not tested	0	0	0	0
AG16	3°49'07.6"N 77°01'58.5"W; Campo hermoso mangrove, Buenaventura, Valle del Cauca, Colombia	Avicennia germinans	Root	TSA	TTCTTCTGATTTAGCGGCGGACGGGTGAGTAACACGTGGGCAACCTGCCCTGTAGATTGGGATAACTCCGGGAAACCGGGGCTAATACCGAATAATCCATTCCCTCACATGTGGGAATGTTAAAAGACGGTTTCGGCTGTCACTACAGGATGGGCCCGCGGCGCATTAGCTAGTTGGTGAGGTAACGGCTCACCAAGGCGACGATGCGTAGCCGACCTGAGAGGGTGATCGGCCACACTGGGACTGAGACACGGCCCAGACTCCTACGGGAGGCAGCAGTAGGGAATCTTCCACAATGGACGAAAGTCTGATGGAGCAACGCCGCGTGAGTGAAGAAGGTTTTCGGATCGTAAAACTCTGTTGTGAGGGAAGAACAAGTACGAGAGTAACTGCTCGTAC…	PZ394985	98.4	642	Psychrobacillus psychrodurans	k__Bacteria	p__Firmicutes	c__Bacilli	o__Bacillales	f__Planococcaceae	g__Psychrobacillus	s__psychrodurans	Not tested	Not tested	Not tested	Not tested	0	0	0	0
AG17	3°49'07.6"N 77°01'58.5"W; Campo hermoso mangrove, Buenaventura, Valle del Cauca, Colombia	Avicennia germinans	Root	TSA	GCTCCGGCGTCGCCTGGGGATGGCTTTGCGGTGCATTAGCTAGTTGGTGGGGTAATGGCCCACCAAGGCGACGATGCATAGCCGACCTGAGAGGGTGATCGGCCACACTGGGACTGAGACACGGCCCAGACTCCTACGGGAGGCAGCAGTAGGGAATCTTCCACAATGGACGAAACTCTGATGGAGCAACGCCGCGTGAACGATGAAGGCCTTCGGGTCGTAAAGTTCTGTTGTATGGGAAGAACAAGTGCCGCAGGCAATGGCGGCACCTTGACGGTACCTTGCGAGAAAGCCACGGCTAACTACGTGCCAGCAGCCGCGGTAATACGTAGGTGGCAAGCGTTGTCCGGAATTATTGGGCGTAAAGCGCGCGCAGGCGGCCTCTTAAGTCTGATGTGA…	PZ394986	100	436	Exiguobacterium aquaticum	k__Bacteria	p__Firmicutes	c__Bacilli	o__Bacillales	f__Bacillales_Incertae Sedis XII	g__Exiguobacterium	s__aquaticum	Not tested	Not tested	Not tested	Not tested	0	0	0	0
AG18	3°49'07.6"N 77°01'58.5"W; Campo hermoso mangrove, Buenaventura, Valle del Cauca, Colombia	Avicennia germinans	Root	TSA	TTACTAGCGATTCCAGCTTCACGCAGGCGAGTTGCAGCCTGCGATCCGAACTGAGACCGGTTTTTTGGGATTGGCTCCCCCTCACGGGTTCGCTGCCCGTTGTACCGGCCATTGTAGCACGTGTGTAGCCCAGGACATAAGGGGCATGATGATTTGACGTCATCCCCAC	PZ394987	100	169	Kroppenstedtia eburnea	k__Bacteria	p__Firmicutes	c__Bacilli	o__Thermoactinomycetales	f__Thermoactinomycetaceae	g__Kroppenstedtia	s__eburnea	Not tested	Not tested	Not tested	Not tested	0	0	0	0
AG19	3°49'07.6"N 77°01'58.5"W; Campo hermoso mangrove, Buenaventura, Valle del Cauca, Colombia	Avicennia germinans	Root	TSA	CAGTGGCGAACGGGTGAGTAACACGTGAGTAACCTGCCCCAGACTCTGGGATAAGCCTTGGAAACGGGGTCTAATACCGGATAAGCGGCACCACCGCATGGTGAGTGTTGGGAAAGTTTTTCGGTCTGGGATGGACTCGCGGCCTATCAGCTTGTTGGTGAGGTAATGGCTCACCAAGGCGACGACGGGTAGCCGGCCTGAGAGGGCGACCGGCCACACTGGAACTGAGACACGGTCCAGACTCCTACGGGAGGCAGCAGTGGGGAATATTGCACAATGGGCGCAAGCCTGATGCAGCGACGCCGCGTGGGGGATGAAGGCCTTCGGGTTGTAAACCCCTTTCAGCAGGGAAGAAGCGAGAGTGACGGTACCTGCAGAAGAAGCGCCGGCTAACTACGT…	PZ394988	100	1144	Demequina maris	k__Bacteria	p__Actinobacteriota	c__Actinobacteria	o__Micrococcales	f__Demequinaceae	g__Demequina	s__maris	Not tested	Not tested	Not tested	Not tested	0	0	0	0
AG20	3°49'07.6"N 77°01'58.5"W; Campo hermoso mangrove, Buenaventura, Valle del Cauca, Colombia	Avicennia germinans	Rhizosphere	TSA	ATTACTAGCGATTCCAGCTTCATGTAGGCGAGTTGCAGCCTACAATCCGAACTGAGAACGGTTTTATGAGATTAGCTCCACCTCGCGGTCTTGCAGCTCTTTGTACCGTCCATTGTAGCACGTGTGTAGCCCACGTCATAAGGGGGGTGATGATTTTACGTCATCCCCACCTTCCTCCGGTTTGTCGCCGGCGGTCACCTTTTAGTGCTCCCCCATAATGATAGGGGAAATAAAAAGGGGGGGT	PZ394989	100	244	Bacillus cereus	k__Bacteria	p__Firmicutes	c__Bacilli	o__Bacillales	f__Bacillaceae	g__Bacillus	s__cereus	Not tested	Not tested	Not tested	Not tested	0	2	0	0
AG21	3°49'07.6"N 77°01'58.5"W; Campo hermoso mangrove, Buenaventura, Valle del Cauca, Colombia	Avicennia germinans	Root	TSA	TTTAGCGGCGGACGGGTGAGTAACACGTGGGCAACCTGCCCTGTAGATTGGGATAACTCCGGGAAACCGGGGCTAATACCAAATAATCCATTTCCTCACATGTGGAAAT		100	109	Psychrobacillus psychrodurans	k__Bacteria	p__Firmicutes	c__Bacilli	o__Bacillales	f__Planococcaceae	g__Psychrobacillus	s__psychrodurans	Not tested	Not tested	Not tested	Not tested	0	0	0	0
AG22	3°49'07.6"N 77°01'58.5"W; Campo hermoso mangrove, Buenaventura, Valle del Cauca, Colombia	Avicennia germinans	Root	TSA	TGATCTGCGATTACTAGCGACTCCGACTTCATGAGGTCGAGTTGCAGACCTCAATCCGAACTGAGACCGGCTTTTTGGGATTCGCTCCACCTTACGGTATCGCAGCCCATTGTACCGGCCATTGTAGCATGCGTGAAGCCCAAGACATAAGGGGCATGATGATTTGACGTCATCCCCACCTTCCTCCGAGTTGACCCCGGCAGTCTCCTATGAGTCCCCACCATTACGTGCTGGCAACATAGGACGAGGGTTGCGCTCGTTGCGGGACTTAACCCAACATCTCACGACACGAGCTGACGACAACCATGCACCACCTGTATACCCCGCCGAAGCACTCCCCATCTCTGGGGATAGAGGGTATATGTCAAGCCTTGGTAAGGTTCTTCGCGTTGCATCGAA…	PZ394990	98.3	528	Lysinimicrobium rhizosphaerae	k__Bacteria	p__Actinobacteriota	c__Actinobacteria	o__Micrococcales	f__Demequinaceae	g__Lysinimicrobium	s__rhizosphaerae	Not tested	Not tested	Not tested	Not tested	0	0	0	0
AG24	3°49'07.6"N 77°01'58.5"W; Campo hermoso mangrove, Buenaventura, Valle del Cauca, Colombia	Avicennia germinans	Root	TSA	CGGACGGGTGAGTAACACGTGGGCAACCTGCCCTGTAGATTGGGATAACTCCGGGAAACCGGGGCTAATACCGAATAATCCATTCCCTCACATGTGGGAATGTTAAAAGACGGTTTCGGCTGTCACTACAGGATGGGCCCGCGGCGCAT		100	149	Psychrobacillus psychrodurans	k__Bacteria	p__Firmicutes	c__Bacilli	o__Bacillales	f__Planococcaceae	g__Psychrobacillus	s__psychrodurans	Not tested	Not tested	Not tested	Not tested	0	0	0	0
AG26	3°49'07.6"N 77°01'58.5"W; Campo hermoso mangrove, Buenaventura, Valle del Cauca, Colombia	Avicennia germinans	Rhizosphere	TSA	GATTCCGACTTCATGGAGTCGAGTTGCAGACTCCAATCCGGACTACGACGCACTTTTTGGGATTCGCTCACTTTCGCAAGTTGGCCGCCCTCTGTATGCGCCATTGTAGCACGTGTGTAGCCCTACTCGTAAGGGCCATGATGACTTGACGTCGTCCCCACCTTCCTCCGGTTTATCACCGGCAGTCTCCCTGGAGTTCCCGACATTACTCGCTGGCAAACAAGGATAAGGGTTGCGCTCGTTGCGGGACTTAACCCAACATTTCACAACACGAGCTGACGACAGCCATGCAGCACCTGTCTCAGAGTTCCCGAAGGCACCAAAGCATCTCTGCTAAGTTCTCTGGATGTCAAGAGTAGGTAAGGTTCTTCGCGTTGCATCGAATTAAACCACATGCTC…	PZ394991	99	671	Vibrio fluvialis	k__Bacteria	p__Proteobacteria	c__Gammaproteobacteria	o__Vibrionales	f__Vibrionaceae	g__Vibrio	s__fluvialis	Not tested	Not tested	Not tested	Not tested	0	0	0	0
AG27	3°49'07.6"N 77°01'58.5"W; Campo hermoso mangrove, Buenaventura, Valle del Cauca, Colombia	Avicennia germinans	Rhizosphere	TSA	GGCCATGATGACTTGACGTCGTCCCCACCTTCCTTCCGGTTTATCACCGGCAGTCTCCCTGGAGTTCCCGACATTACTCGCTGGCAAACAAGGATAAGGGTTGCGCCTCGGTGCGGGGACTTAACCCAACATTTCACAACACCGGAGCTGACGACAGCCATGC	PZ394992	100	163	Vibrio parahaemolyticus	k__Bacteria	p__Proteobacteria	c__Gammaproteobacteria	o__Vibrionales	f__Vibrionaceae	g__Vibrio	s__parahaemolyticus	Not tested	Not tested	Not tested	Not tested	0	0	0	0
AG28	3°49'07.6"N 77°01'58.5"W; Campo hermoso mangrove, Buenaventura, Valle del Cauca, Colombia	Avicennia germinans	Rhizosphere	TSA	ACGTGGGTAACCTGCCTGTAAGACTGGGATAACTCCGGGAAACCGGAGCTAATACCGGATAGTTCCTTGAACCGCATGGTTCAAGGATGAAAGACGGTTTCGGCTGTCACTTACAGATGGACCCGCGGCGCATTAGCTAGTTGGTGAGGTAACGGCTCACCAAGGCGACGATGCGTAGCCGACCTGAGAGGGTGATCGGCCACACTGGGACTGAGACACGGCCCAGACTCCTACGGGAGGCAGCAGTAGGGAATCTTCCGCAATGGACGAAAGTCTGACGGAGCAACGCCGCGTGAGTGATGAAGGTTTTCGGATCGTAAAGCTCTGTTGTTAGGGAAGAACAAGTGCAAGAGTAACTGCTTGCACCCTTGACGGTACCTAACCCAGAAAGCCACGGCT…	PZ394993	100	533	Bacillus pumilus	k__Bacteria	p__Firmicutes	c__Bacilli	o__Bacillales	f__Bacillaceae	g__Bacillus	s__pumilus	Not tested	Not tested	Not tested	Not tested	0	0	2	2
AG29	3°49'07.6"N 77°01'58.5"W; Campo hermoso mangrove, Buenaventura, Valle del Cauca, Colombia	Avicennia germinans	Rhizosphere	TSA	CTGAGAGGATGATCAGCCACACTGGAACTGAGACACGGTCCAGACTCCTACGGGAGGCAGCAGTGGGGAATATTGGACAATGGGCGCAAGCCTGATCCAGCCATACCGCGTGGGTGAAGAAGGCCTTCGGGTTGTAAAGCCCTTTTGTTGGGAAAGAAAAGCAGTCGGCTAATACCCGGTTGTTCTGACGGTACCCAAAGAATAAGCACCGGCTAACTTCGTGCCAGCAGCCGCGGTAATACGAAGGGTGCAAGCGTTACTCGGAATTACTGGGCGT	PZ394994	100	277	Stenotrophomonas rhizophila	k__Bacteria	p__Proteobacteria	c__Gammaproteobacteria	o__Xanthomonadales	f__Xanthomonadaceae	g__Stenotrophomonas	s__rhizophila	Not tested	Not tested	Not tested	Not tested	0	0	1	0
AG30	3°49'07.6"N 77°01'58.5"W; Campo hermoso mangrove, Buenaventura, Valle del Cauca, Colombia	Avicennia germinans	Rhizosphere	TSA	GCCCATAAGACTGGGATAACTCCGGGAAACCGGGGCTAATACCGGATAACATTTTGAACTGCATGGTTCGAAATTGAAAGGCGGCTTCGGCTGTCACTTATGGATGGACCCGCGTCGCATTAGCTAGTTGGTGAGGTAACGGCTCACCAAGGCAACGATGCGTAGCCGACCTGAGAGGGTGATCGGCCACACTGGGACTGAGACACGGCCCAGACTCCTACGGGAGGCAGCAGTAGGGAATCTTCCGCAATGGACGAAAGTCTGACGGAGCAACGCCGCGTGAGTGATGAAGGCTTTCGGGTCGTAAAACTCTGTTGTTAGGGAAGAACAAGTGCTAGTTGAATAAGCTGGCACCTTGACGGTACCTAACCAGAAAGCCACGGCTAACTACGTGCCAGC…	PZ394995	99.1	1056	Bacillus thuringiensis	k__Bacteria	p__Firmicutes	c__Bacilli	o__Bacillales	f__Bacillaceae	g__Bacillus	s__thuringiensis	Not tested	Not tested	Not tested	Not tested	0	0	1	1
AG31	3°49'07.6"N 77°01'58.5"W; Campo hermoso mangrove, Buenaventura, Valle del Cauca, Colombia	Avicennia germinans	Rhizosphere	TSA	TGCTCTCGGGTGACGAGCGGCGGACGGGTGAGTAATGTCTGGGAAACTGCCTGATGGAGGGGGATAACTACTGGAAACGGTAGCTAATACCGCATAACGTCGCAAGACCAAAGTGGGGGACCTTCGGGCCTCATGCCATCAGATGTGCCCAGATGGGATTAGCTGGTAGGTGGGGTAACGGCTCACCTAGGCGACGATCCCTAGCTGGTCTGAGAGGATGACCAGCCACACTGGAACTGAGACACGGTCCAGACTCCTACGGGAGGCAGCAGTGGGGAATATTGCACAATGGGCGCAAGCCTGATGCAGCCATGCCGCGTGTGTGAAGAAGGCCTTCGGGTTGTAAAGCACTTTCAGCGGGGAGGAAGGCGATAAGGTTAATAACCTTGTCGATTGACG…	PZ394996	98.9	656	Klebsiella variicola	k__Bacteria	p__Proteobacteria	c__Gammaproteobacteria	o__Enterobacterales	f__Enterobacteriaceae	g__Klebsiella	s__variicola	Not tested	Not tested	Not tested	Not tested	0	0	1	0
AG32	3°49'07.6"N 77°01'58.5"W; Campo hermoso mangrove, Buenaventura, Valle del Cauca, Colombia	Avicennia germinans	Stem	TSA	CGGACGGGTGAGTAACACGTGGGCAACCTGCCTATAAGACTGGGATAACTTCGGGAAACCGGAGCTAATACCGGATACGTTCTTTTCTCGCATGAGAGAAGATGGAAAGACGGTTTACGCTGTCACTTATAGATGGGCCCGCGGCGCATTAGCTAGTTGGTGAGGTAATGGCTCACCAAGGCGACGATGCGTAGCCGACCTGAGAGGGTGATCGGCCACACTGGGACTGAGACACGGCCCAGACTCCTACGGGAGGCAGCAGTAGGGAATCTTCCGCAATGGACGAAAGTCTGACGGAGCAACGCCGCGTGAACGAAGAAGGCCTTCGGGTCGTAAAGTTCTGTTGTTAGGGAAGAACAAGTACCAGAGTAACTGCTGGTACCTTGACGGTACCTAACC…	PZ394997	100	1077	Peribacillus frigoritolerans	k__Bacteria	p__Firmicutes	c__Bacilli	o__Bacillales	f__Bacillaceae	g__Peribacillus	s__frigoritolerans	Not tested	Not tested	Not tested	Not tested	0	0	0	0
AG34	3°49'07.6"N 77°01'58.5"W; Campo hermoso mangrove, Buenaventura, Valle del Cauca, Colombia	Avicennia germinans	Root	TSA	GACGGGTGAGTAACACGTGGGCAACCTGCCTATAAGACTGGGATAACTTCGGGAAACCGGAGCTAATACCGGATACGTTCTTTTCTCGCATGAGAGAAGATGGAAAGACGGTTTACGCTGTCATCTTATAGATGGGCCCGCGGCGCATTAGCTAGTTGGTGAGGTAATGGCTCACCAAGGCGAACGATGCGTAGCCGACCTGAAGAGGGTGATCGGCCACACTGGGACTGAGACACCGGCCCAGACTCCTACGGGAGGCAGCAGTAGGG	PZ394998	100	269	Peribacillus frigoritolerans	k__Bacteria	p__Firmicutes	c__Bacilli	o__Bacillales	f__Bacillaceae	g__Peribacillus	s__frigoritolerans	Not tested	Not tested	Not tested	Not tested	0	0	2	0
AG35	3°49'07.6"N 77°01'58.5"W; Campo hermoso mangrove, Buenaventura, Valle del Cauca, Colombia	Avicennia germinans	Root	TSA	ACTAGCGACTCCGACTTCATGAGGTCGAGTTGCAGACCTCAATCCGAACTGAGACCGGCTTTTTGGGATTCGCTCCACCTTACGGTATCGCAGCCCTTTGTACCGGCCATTGTAGCATGCGTGAAGCCCAAGACATAAGGGGCATGATGATTTGACGTCATCCCCACCTTCCTCCGAGTTGACCCGGGCAGTCTCCTATGAGTTCCCACCATTACGTGCTGGCAACATAGAACGAGGGTTGCGCTCGTTGCGGGACTTAA	PZ394999	100	260	Clavibacter michiganensis	k__Bacteria	p__Actinobacteriota	c__Actinobacteria	o__Micrococcales	f__Microbacteriaceae	g__Clavibacter	s__michiganensis	Not tested	Not tested	Not tested	Not tested	0	0	0	0
AG38	3°49'07.6"N 77°01'58.5"W; Campo hermoso mangrove, Buenaventura, Valle del Cauca, Colombia	Avicennia germinans	Root	TSA	AGTTGGCCGCCCTCTGTATGCGCCATTGTACCACGTGTGTAGCCCTACTCGTAAGGGTCATGATGACTTGACACCGTCCCCACCTTCCTCCGGTTTATCACCGGAAGACTCCCTGGAGTTCCCGACATTACTCGCTGGCAAACAAGGATAAGGGTTGCGCTCGTTGCGGGACTTAACCCAAC	PZ395000	100	182	Vibrio alginolyticus	k__Bacteria	p__Proteobacteria	c__Gammaproteobacteria	o__Vibrionales	f__Vibrionaceae	g__Vibrio	s__alginolyticus	Not tested	Not tested	Not tested	Not tested	0	0	0	0
AG39	3°49'07.6"N 77°01'58.5"W; Campo hermoso mangrove, Buenaventura, Valle del Cauca, Colombia	Avicennia germinans	Root	TSA	GATTACTAGCGATTCCGCCTTCATGCTCTCGAGTTGCAGAGAACAATCCGAACTGAGACGGCTTTTGGAGATTAGCTCACACTCGCGTGCTCGCTGCCCACTGTCACCGCCATTGTAGCACGTGTGTAGCCCAGCGTGTAAGGGCCATGAGGACTTGACGTCATCCCCACCTTCCTCCGGCTTATCACCGGCAGTTTCCTTAGAGTG	PZ395001	100	207	Novosphingobium naphthalenivorans	k__Bacteria	p__Proteobacteria	c__Alphaproteobacteria	o__Sphingomonadales	f__Sphingomonadaceae	g__Novosphingobium	s__naphthalenivorans	Not tested	Not tested	Not tested	Not tested	0	0	0	0
AG41	3°49'07.6"N 77°01'58.5"W; Campo hermoso mangrove, Buenaventura, Valle del Cauca, Colombia	Avicennia germinans	Root	TSA	AGCGATTCCAACTTCATGCACTCGAGTTGCAGAGTGCAATCCGAACTGAGACGGCTTTTGGAGATTTGCTCACCCTCGCAGGCTCGCATCCCACTGTCACCGCCATTGTAGCACGTGTGTAGCCCAGCCCGTAAGGGCCATGAGGACTTGACGTCATCCCCACCTTCCTCGCGGCTTATCACCGGCAGTCCCTTTAGAGTGCCCAACTGAATGATGGCAACTAAAGGCGA	PZ395002	97.8	230	Azorhizobium oxalatiphilum	k__Bacteria	p__Proteobacteria	c__Alphaproteobacteria	o__Rhizobiales	f__Xanthobacteraceae	g__Azorhizobium	s__oxalatiphilum	Not tested	Not tested	Not tested	Not tested	0	0	0	0
AG42	3°49'07.6"N 77°01'58.5"W; Campo hermoso mangrove, Buenaventura, Valle del Cauca, Colombia	Avicennia germinans	Rhizosphere	TSA	CCTACGGGAGGCAGCAGTGGGGAATATTGGACAATGGGCGAAAGCCTGATCCAGCTATGCCGCGTGAGTGAAGAAGGCCTTCGGGTTGTAAAACTCTTTT		100	100	Ehrlichia ruminantium	k__Bacteria	p__Proteobacteria	c__Alphaproteobacteria	o__Rickettsiales	f__Anaplasmataceae	g__Ehrlichia	s__ruminantium	Not tested	Not tested	Not tested	Not tested	0	0	0	0
AG43	3°49'07.6"N 77°01'58.5"W; Campo hermoso mangrove, Buenaventura, Valle del Cauca, Colombia	Avicennia germinans	Rhizosphere	TSA	GAAACGACTGCTAATACCGCATACGCCCTACGGGGGAAAGAGGGGGACTTTCGGGCCTCTCGCGATTGGATGAACCTAGGTGGGATTAGCTAGTTGGTGAGGTAATGGCTCACCAAGGCGACGATCCCTAGCTGgTCTGAGAGGATGATCAGCCACACTGGGACTGAGACACGGtCCAGACTCCTACGGGAGGCAGCAGTGGGGAATATTGCACAATGGGGGAAACCCTGATGCAGCCATGCCGCGTGTGTGAAGAAGGCCTTCGGGTTGTAAAGCACTTTCAGTAGGGAGGAAAGGTTGTAAGTTAATACCTTGCAGCTGTGACGTTACCTACAGAAGAAGGACCGGCTAACTCCGTGCCAGCAGCCGCGGTAATACGGAGGGTCCAAGCGTTAATCG…	PZ395003	98.4	423	Shewanella mangrovisoli	k__Bacteria	p__Proteobacteria	c__Gammaproteobacteria	o__Alteromonadales	f__Shewanellaceae	g__Shewanella	s__mangrovisoli	Not tested	Not tested	Not tested	Not tested	0	0	0	0
AG44	3°49'07.6"N 77°01'58.5"W; Campo hermoso mangrove, Buenaventura, Valle del Cauca, Colombia	Avicennia germinans	Rhizosphere	TSA	AATCCAAACTGAAACCGGCTTTTTGGGATTCGCTCCCCCTTACGACATCGCAACCCTTTGTACC		95.3	64	Agromyces fucosus	k__Bacteria	p__Actinobacteria	c__Actinobacteria	o__Actinomycetales	f__Microbacteriaceae	g__Agromyces	s__fucosus	Not tested	Not tested	Not tested	Not tested	0	0	0	0
AG46	3°49'07.6"N 77°01'58.5"W; Campo hermoso mangrove, Buenaventura, Valle del Cauca, Colombia	Avicennia germinans	Rhizosphere	TSA	GATTACTAGCGACTCCGACTTCATGAGGTCGAGTTGCAGACCTCAATCCGAACTGAGACCGGCTTTTTGGGATTCGCTCCGCCTTACGACATCGCAGCCCTTTGTACCGGCCATTGTAGCATGCGTGAAGCCCAAGACATAAGGGGCATGATGATTTGACGTCATCCCC	PZ395004	100	169	Agromyces mangrovi	k__Bacteria	p__Actinobacteriota	c__Actinobacteria	o__Micrococcales	f__Microbacteriaceae	g__Agromyces	s__mangrovi	Not tested	Not tested	Not tested	Not tested	0	0	0	0
AG51	3°49'07.6"N 77°01'58.5"W; Campo hermoso mangrove, Buenaventura, Valle del Cauca, Colombia	Avicennia germinans	Root	TSA	GATCTGCGATTACTAGCGACTCCGACTTCACGGGGTCGAGTTGCAGACCCCGATCCGAACTGAGACCGGCTTTGAAAGGATTCGCTCCACCTCACGGCATCGCAGCCCTTTGTACCGGCCATTGTAGCATGTGTGAAGCCCTGGACATAAGGGGCATGATGACTTGACGTCATCCCCACCTTCCTCCGAGTTGACCCCGGCAGTCTCTCACGAGTCCCCACCATTACGTGCTGGCAACATGAGACAAGGGTTGCGCTCGTTGCGGGACTTAACCCAACATCTCACGACACGAGCTGACGACAGCCATGCACCACCTGCACACAGGCCACAAGGGAATACCTATCTCTAGGCACGTCCTGTGCATGTCAAACCCAGGTAAGGTTCT	PZ395005	96.4	385	Mycobacterium pyrenivorans	k__Bacteria	p__Actinobacteria	c__Actinobacteria	o__Mycobacteriales	f__Mycobacteriaceae	g__Mycobacterium	s__pyrenivorans	Not tested	Not tested	Not tested	Not tested	0	0	0	0
AG53	3°49'07.6"N 77°01'58.5"W; Campo hermoso mangrove, Buenaventura, Valle del Cauca, Colombia	Avicennia germinans	Rhizosphere	TSA	ACTAGCGACTCCGACTTCATGAGGTCGAGTTGCAGACCTCAATCCGAACTGAGACCGGCTTTTTGGGATTCGCTCCGCCTTACGACATCGCAGCCCTTTGTACCGGCCATTGTAGCATGCGTGAAGCCCAAGACATAAGGGGCATGATGATTTGACGTCATCCCCACCTTCCTCCGAGTTGACCCCGGCAGTCTCACATGAGTCCCCACCATAACGTGCTGGCAACATGCGACGAGGGTTGCGCTCGTTGCGGGACTTAACCCAACATCTCACGACACGAGCTGACGACAACCATGCACCACCTGTAACCGAGTGTCCAAAGAGTTCC	PZ395006	98.8	328	Agromyces ulmi	k__Bacteria	p__Actinobacteriota	c__Actinobacteria	o__Micrococcales	f__Microbacteriaceae	g__Agromyces	s__ulmi	Not tested	Not tested	Not tested	Not tested	0	0	0	0
AG54	3°49'07.6"N 77°01'58.5"W; Campo hermoso mangrove, Buenaventura, Valle del Cauca, Colombia	Avicennia germinans	Rhizosphere	TSA	ACTCCGACTTCATGAGGTCGAGTTGCAGACCTCAATCCGAACTGAGACCGGCTTTTTGGGATTCGCTCCACCTCGCGGTATCGCAGCCCATTGTACCGGCCATTGTAGCATGCGTGAAGCCCAAGACATAAGGGGCATGATGATTTGACCTCATCCCCACCTTCCTCCGAGTTGACCCCGGCAGTATCCCATGAGTTCCCACCATGACGTGCTGGCAACATAGGACGAGGGTTGCGCTCGTTGCGGGACTTAACCCAACATCTCACGACACGAGCTGACGACAACCATGCACCACCTGTATACGAGTGTCCAAAGAGTTCGCTGTCTCCAGCGCGTTCTCGTATATGTCAAGCCTTGGTAAGGTTCTTCGCGTTGCATCGAATTAATCCGCATGCTCCG…	PZ395007	98	637	Agrococcus terreus	k__Bacteria	p__Actinobacteriota	c__Actinobacteria	o__Micrococcales	f__Microbacteriaceae	g__Agrococcus	s__terreus	Not tested	Not tested	Not tested	Not tested	0	0	0	0
AG55	3°49'07.6"N 77°01'58.5"W; Campo hermoso mangrove, Buenaventura, Valle del Cauca, Colombia	Avicennia germinans	Rhizosphere	TSA	CGCGTGGGAACATACCCTTTCCTGCGGAATAGCTCCGGGAAACTGGAATTAATACCGCATACGCCCTACGGGGGAAAGATTTATCGGGGAAGGATTGGCCCGCGTTGGATTAGCTAGTTGGTGGGGTAAAGGCCTACCAAGGCGACGATCCATAGCTGGTCTGAGAGGATGATCAGCCACATTGGGACTGAGACACGGCCCAAACTCCTACGGGAGGCAGCAGTGGGGAATATTGGACAATGGGCGCAAGCCTGATCCAGCCATGCCGCGTGAGTGATGAAGGCCTTAGGGTTGTAAAGCTCTTTCACCGATGAAGATAATGACGGTAGTCGGAGAAGAAGCCCCGGCTAACTTCGTGCCAGCAGCCGCGGTAATACGAAGGGGGCTAGCGTTGTTCGG…	PZ395008	95.9	1079	Agrobacterium salinitolerans	k__Bacteria	p__Proteobacteria	c__Alphaproteobacteria	o__Rhizobiales	f__Rhizobiaceae	g__Agrobacterium	s__salinitolerans	Not tested	Not tested	Not tested	Not tested	0	0	0	0
AG57	3°49'07.6"N 77°01'58.5"W; Campo hermoso mangrove, Buenaventura, Valle del Cauca, Colombia	Avicennia germinans	Stem	TSA	TGGGCCCGCGGCGCATTAGCTAGTTGGTGAGGTAACGGCTCACCAAGGCGACGATGCGTAGCCGACCTGAGAGGGTGATCGGCCACACTGGGACTGAGACACGGCCCAGACTCCTACGGGAGGCAGCAGTAGGGAATCTTCCGCAATGGACGAAAGTCTGACGGAGCAACGCCGCGTGAGCGATGAAGGCCTTCGGGTCGTAAAGCTCTGTTGTTAGGGAAGAACAAGTGCTAGTTAAATAAGCTGGCACCTTGACGGTACCTAACCAGAAAGCCACGGCTAACTACGTGCCAGCAGCCGCGGTAATACGTAGGTGGCAAGCGTTGTCCGGAATTATTGGGCGTAAA	PZ395009	99.7	347	Gottfriedia endophytica	k__Bacteria	p__Firmicutes	c__Bacilli	o__Bacillales	f__Bacillaceae	g__Gottfriedia	s__endophytica	Not tested	Not tested	Not tested	Not tested	0	0	0	0
AG58	3°49'07.6"N 77°01'58.5"W; Campo hermoso mangrove, Buenaventura, Valle del Cauca, Colombia	Avicennia germinans	Stem	TSA	TTGCTCCCTGAGATTAGCGGCGGACGGGTGAGTAACACGTGGGCAACCTGCCTATAAGACTGGGATAACTTCGGGAAACCGGAGCTAATACCGGATACGTTCTTTTCTCGCATGAGAGAAGATGGAAAGACGGTTTACGCTGTCACTTATAGATGGGCCCGCGGCGCATTAGCTAGTTGGTGAGGTAATGGCTCACCAAGGCGACGATGCGTAGCCGACCTGAGAGGGTGATCGGCCACACTGGGACTGAGACACGGCCCAGACTCCTACGGGAGGCAGCAGTAGGGAATCTTCCGCAATGGACGAAAGTCTGACGGAGCAACGCCGCGTGAACGAAGAAGGCCTTCGGGTCGTAAAGTTCTGTTGTTAGGGAAGAACAAGTACCAGAGTAACTGCTGG…	PZ395010	100	1178	Peribacillus frigoritolerans	k__Bacteria	p__Firmicutes	c__Bacilli	o__Bacillales	f__Bacillaceae	g__Peribacillus	s__frigoritolerans	Not tested	Not tested	Not tested	Not tested	0	0	0	0
AG59	3°49'07.6"N 77°01'58.5"W; Campo hermoso mangrove, Buenaventura, Valle del Cauca, Colombia	Avicennia germinans	Rhizosphere	TSA	GGTGGCGAGTGGCGGACGGGTGAGGAATACATCGGAATCTACTCTTTCGTGGGGGATAACGTAGGGAAACTTACGCTAATACCGCATACGACCTACGGGTGAAAGCGGAGGACCTTCGGGCTTCGCGCGATTGAATGAGCCGATGTCGGATTAGCTAGTTGGCGGGGTAAAGGCCCACCAAGGCGACGATCCGTAGCTGGTCTGAGAGGATGATCAGCCACACTGGAACTGAGACACGGTCCAGACTCCTACGGGAGGCAGCAGTGGGGAATATTGGACAATGGGCGCAAGCCTGATCCAGCCATGCCGCGTGGGTGAAGAAGGCCTTCGGGTTGTAAAGCCCTTTTGTTGGGAAAGAAAAGCAGTCGGTTAATACCCGATTGTTCTGACGGTACCCAA…	PZ395011	97.7	608	Xanthomonas arboricola	k__Bacteria	p__Proteobacteria	c__Gammaproteobacteria	o__Xanthomonadales	f__Xanthomonadaceae	g__Xanthomonas	s__arboricola	Not tested	Not tested	Not tested	Not tested	0	0	0	0
AG60	3°49'07.6"N 77°01'58.5"W; Campo hermoso mangrove, Buenaventura, Valle del Cauca, Colombia	Avicennia germinans	Rhizosphere	TSA	GCCGGCGAGCGGCGGACGGGTGAGTAATGCCTAGGAATCTGCCTGGTAGTGGGGGATAACGTTCGGAAACGGGCGCTAATACCGCATACGTCCTACGGGAGAAAGTGGGGGATCTTCGGACCTCACGCTATCAGATGAGCCTAGGTCGGATTAGCTAGTTGGTGGGGTAATGGCTCACCAAGGCGACGATCCGTAACTGGTCTGAGAGGATGATCAGTCACACTGGAACTGAGACACGGTCCAGACTCCTACGGGAGGCAGCAGTGGGGAATATTGGACAATGGGCGAAAGCCTGATCCAGCCATGCCGCGTGTGTGAAGAAGGTCTTCGGATTGTAAAGCACTTTAAGTTGGGAGGAAGGGCAGTAAGTTAATACCTTGCTGTTTTGACGTTACCAAC…	PZ395012	92.8	443	Pseudomonas resinovorans	k__Bacteria	p__Proteobacteria	c__Gammaproteobacteria	o__Pseudomonadales	f__Pseudomonadaceae	g__Pseudomonas	s__resinovorans	Not tested	Not tested	Not tested	Not tested	0	0	0	0
AG61	3°49'07.6"N 77°01'58.5"W; Campo hermoso mangrove, Buenaventura, Valle del Cauca, Colombia	Avicennia germinans	Rhizosphere	TSA	CTTGCTCCCTGAGATTAGCGGCGGACGGGTGAGTAACACGTGGGCAACCTGCCTATAAGACTGGGATAACTTCGGGAAACCGGAGCTAATACCGGATACGTTCTTTTCTCGCATGAGAGAAGATGGAAAGACGGTTTCTGCTGTCCCTTATAAATGGGCCCCCGGCGCATTAGCTATTTGGGGAGGTAATGGCTCCCCAAGGCAACAATGCGTAGCCGACCTGAAAGGGGGATCGGCCCCACTGGGACTGAAACCCGGCCCAAACTCCTACGGGAGGGAGCATTAGGGAATCTTCCCCAATGGACAA	PZ395013	93.7	307	Peribacillus frigoritolerans	k__Bacteria	p__Firmicutes	c__Bacilli	o__Bacillales	f__Bacillaceae	g__Peribacillus	s__frigoritolerans	Not tested	Not tested	Not tested	Not tested	0	0	0	0
AG62	3°49'07.6"N 77°01'58.5"W; Campo hermoso mangrove, Buenaventura, Valle del Cauca, Colombia	Avicennia germinans	Rhizosphere	TSA	CTTGCTCTTGTGGATCAGTGGCGAACGGGTGAGTAACACGTGAGTAACCTGCCCCAGACTCTGGGATAAGCCTTGGAAACGAGGTCTAATACCGGATATGCGACTCCACCGCATGGTGAGGGTCGGGAAAGTTTTTCGGTCTGGGATGGACTCGCGGCCTATCAGCTTGTTGGTGAGGTAATGGCTCACCAAGGCGACGACGGGTAGCCGGCCTGAGAGGGCGACCGGCCACACTGGAACTGAGACACGGTCCAGACTCCTACGGGAGGCAGCAGTGGGGAATATTGCACAATGGGCGAAAGCCTGATGCAGCGACGCCGCGTGGGGGATGAAGGCCTTCGGGTTGTAAACCCCTTTCAGCAGGGAAGAAGCGAAAGTGACGGTACCTGCAGAAGAAGC…	PZ395014	95	499	Demequina salsinemoris	k__Bacteria	p__Actinobacteriota	c__Actinobacteria	o__Micrococcales	f__Demequinaceae	g__Demequina	s__salsinemoris	Not tested	Not tested	Not tested	Not tested	0	0	0	0
AG63	3°49'07.6"N 77°01'58.5"W; Campo hermoso mangrove, Buenaventura, Valle del Cauca, Colombia	Avicennia germinans	Rhizosphere	TSA	GATCTGCGATTACTAGCGACTCCGACTTCATGAGGTCGAGTTGCAGACCTCAATCCGAACTGAGACCGGCTTTTTGGGATTCGCTCCGCCTTACGACATCGCAGCCCTTTGTACCGGCCATTGTAGCATGCGTGAAGCCCAAGACATAAGGGGCATGATGATTTGACGTCATCCCCACCTTCCTCCGAGTTGACCCCGGCAGTCTCACATGAGTCCCCACCATAACGTGCTGGCAACATGCGACGAGGGTTGCGCTCGTTGCGGGACTTAAACCCAACATCTCACGACACGAGCTGACGACAACCATGCACCACCTGTACACCGGTGTCCAAAGAGTTCTTCATTTCTGAAGCGTTCCGGTGTATGTCAAGCCTTGGTAAGGTTCT	PZ395015	95.9	386	Agromyces aurantiacus	k__Bacteria	p__Actinobacteriota	c__Actinobacteria	o__Micrococcales	f__Microbacteriaceae	g__Agromyces	s__aurantiacus	Not tested	Not tested	Not tested	Not tested	0	0	0	0
AG65	3°49'07.6"N 77°01'58.5"W; Campo hermoso mangrove, Buenaventura, Valle del Cauca, Colombia	Avicennia germinans	Rhizosphere	TSA	GCGTTGCTGATCTGCGATTACTAGCGACTCCGACTTCATGAGGTCGAGTTGCAGACCTCAATCCGAACTGAGACCGGCTTTTTGGGATTCGCTCCACCTTACGGTATCGCAGCCCTTTGTACCGGCCATTGTAGCATGCGTGAAGCCCAAGACATAAGGGGCATGATGATTTGACGTCATCCCCACCTTCCTCCGAGTTGACCCCGGCAGTCTCCTATGAGTCCCCACCATTACGTGCTGGCAACATAGGACGAGGGTTGCGCTCGTTGCGGGACTTAACCCAACATCTCACGACACGAGCTGACGACAACCATGCACCACCTGTATACCCCGCCGAAGCACCCCCCATCTCTGGGGGTAGAGGG	PZ395016	100	365	Demequina phytophila	k__Bacteria	p__Actinobacteriota	c__Actinobacteria	o__Micrococcales	f__Demequinaceae	g__ Demequina	s__phytophila	Not tested	Not tested	Not tested	Not tested	0	0	0	0
AG67	3°49'07.6"N 77°01'58.5"W; Campo hermoso mangrove, Buenaventura, Valle del Cauca, Colombia	Avicennia germinans	Root	TSA	GATCTGCGATTACTAGCGACTCCGACTTCATGAGGTCGAGTTGCAGACCTCAATCCGAACTGAGACCGGCTTTTTGGGATTCGCTCCGCCTTACGACATCGCAGCCCTTTGTACCGGCCATTGTAGCATGCGTGAAGCCCAAGACATAAGGGGCATGATGATTTGACGTCATCCCCACCTTCCTCCGAGTTGACCCCGGCAGTCTCACATGAGTCCCCACCATAACGTGCTGGCAACATGCGACGAGGG	PZ395017	97.2	249	Agromyces mediolanus	k__Bacteria	p__Actinobacteriota	c__Actinobacteria	o__Micrococcales	f__Microbacteriaceae	g__Agromyces	s__mediolanus	Not tested	Not tested	Not tested	Not tested	0	0	0	0
AG68	3°49'07.6"N 77°01'58.5"W; Campo hermoso mangrove, Buenaventura, Valle del Cauca, Colombia	Avicennia germinans	Root	TSA	AGTTGCAGACCCCGATCCGAACTGAGACCGGCTTTAAGGGATTCGCTCCACCTCACGGCTTGGCAGCCCTCTGTACCGGCCATTGTAGCATGTGTGAAGCCCTGGACATAAGGGGCATGATGACTTGACGTCGTCCCCACCTTCCTCCGAGTTGACCCCGGCAGTCTCCTGCGAGTCCCCACCATTACGTGCTGGCAACACAGGACAAGGGTTGCGCTCGTTGCGGGACTTAACCCAACATCTCACGACACGAGCTGACGACAGCCATGCACCACCTGTACACCGACCTTGCGGAAACCACATCTCTGCAGCTGTCCGGTGCATGTCAAACCC	PZ395018	100	333	Rhodococcus aerolatus	k__Bacteria	p__Actinobacteriota	c__Actinobacteria	o__Corynebacteriales	f__Nocardiaceae	g__Rhodococcus	s__aerolatus	Not tested	Not tested	Not tested	Not tested	0	0	0	0
AG71	3°49'07.6"N 77°01'58.5"W; Campo hermoso mangrove, Buenaventura, Valle del Cauca, Colombia	Avicennia germinans	Rhizosphere	TSA	GACTCCGACTTCACGGGGTCGAGTTGCAGACCCCGATCCGAACTGAGACCGGCTTTAAGGGATTCGCTCCACCTCACGGCTTGGCAGCCCTCTGTACCGGCCATTGTAGCATGTGTGAAGCCCTGGACATAAGGGGCATGATGACTTGACGTCGTCCCCACCTTCCTCCGAGTTGACCCCGGCAGTCTCCTGCGAGTCCCCACCATTACGTGCTGGCAACACAGGACAAGGGTTGCGCTCGTTGCGGGACTTAACCCAACATCTCACGACACGAGCTGACGACAGCCATGCACCACCTGTACACCGACCTTGCGGAAACCACATCTCTGCAGCTGTCCGGTGCATGTCAAACCCAGGTAAGGTTCTTCGCGTTGCATCGAATTAATCCACATGCTCCGC…	PZ395019	100	483	Rhodococcus aerolatus	k__Bacteria	p__Actinobacteriota	c__Actinobacteria	o__Corynebacteriales	f__Nocardiaceae	g__Rhodococcus	s__aerolatus	Not tested	Not tested	Not tested	Not tested	0	0	0	0
AG72	3°49'07.6"N 77°01'58.5"W; Campo hermoso mangrove, Buenaventura, Valle del Cauca, Colombia	Avicennia germinans	Rhizosphere	TSA	GCTTTGAAAGGATTCGCTCCACCTCACGGCATCGCAGCCCTTTGTACCGGCCATTGTAGCATGTGTGAAGCCCTGGACATAAGGGGCATGATGACTTGACGTCATCCCCACCTTCCTCCGAGTTGACCCCGGCAGTCTCTCACGAGTCCCCACCATAACGTGCTGGCAACATGAGACAAGGGTTGCGCTCGTTGCGGGACTTAACCCAACATCTCACGACACGAGCTGACGACAGCCATGCACCACCTGCACACAGGCCACAAGGGAACCGACATCTCTGCCGGCGTCCTGTGCATGTCAAACCCAGGTAAGGTTCTTCGCGTTGCATCGAATTAATCCACATGCTCCGCCGCTTGTGCGGGCCCCCGTCAATTCCTTTGAGTTTTAGCCTTGCGGCCG…	PZ395020	97.3	861	Mycobacterium anyangense	k__Bacteria	p__Actinobacteria	c__Actinobacteria	o__Mycobacteriales	f__Mycobacteriaceae	g__Mycobacterium	s__anyangense	Not tested	Not tested	Not tested	Not tested	0	0	0	0
AG73	3°49'07.6"N 77°01'58.5"W; Campo hermoso mangrove, Buenaventura, Valle del Cauca, Colombia	Avicennia germinans	Rhizosphere	TSA													Not tested	Not tested	Not tested	Not tested	0	0	0	0
AG74	3°49'07.6"N 77°01'58.5"W; Campo hermoso mangrove, Buenaventura, Valle del Cauca, Colombia	Avicennia germinans	Rhizosphere	TSA	CTCTTATGAAGTTAGCGGCGGACGGGTGAGTAACACGTGGGTAACCTACCCATAAGACTGGGATAACTCCGGGAAACCGGGGCTAATACCGGATAATATTTTGAACTGCATAGTTCGAAATTGAAAGGCGGCTTCGGCTGTCACTTATGGATGGACCCGCGTCGCATTAGCTAGTTGGTGAGGTAACGGCTCACCAAGGCGACGATGCGTAGCCGACCTGAGAGGGTGATCGGCCACACTGGGACTGAGACACGGCCCAGACTCCTACGGGAGGCAGCAGTAGGGAATCTTCCGCAATGGACGAAAGTCTGACGGAGCAACGCCGCGTGAGTGATGAAGGCTTTCGGGTCGTAAAACTCTGTTGTTAGGGAAGAACAAGTGCTAGTTGAATAAGCTGGC…	PZ395021	97.2	1052	Bacillus cereus	k__Bacteria	p__Firmicutes	c__Bacilli	o__Bacillales	f__Bacillaceae	g__Bacillus	s__cereus	Not tested	Not tested	Not tested	Not tested	0	0	0	0
AG75	3°49'07.6"N 77°01'58.5"W; Campo hermoso mangrove, Buenaventura, Valle del Cauca, Colombia	Avicennia germinans	Rhizosphere	TSA	CCTGCCCATAAGACTGGGATAACTCCGGGAAACCGGGGCTAATACCGGATAACATTTTGAACTGCATGGTTCGAAATTGAAGGCGGCTTCGGCTGTCACTTATGGATGGACCCGCGTCGCATTAGCTAGTTGGTGAGGTAACGGCTCACCAAGGCAACGATGCGTAGCCGACCTGAGAGGGTGATCGGCCACACTGGGACTGAGACACGGCCCAGACTCCTACGGGAGGCAGCAGTAGGGAATCTTCCGCAATGGACGAAAGTCTGACGGAGCAACGCCGCGTGAGTGATGAAGGCTTTCGGGTCGTAAAACTCTGTTGTTAGAAGAACAAGTGCTAGTTGAATAAGCTGGCACCTTGACGGTACCTAACCA	PZ395022	100	372	Bacillus thuringiensis	k__Bacteria	p__Firmicutes	c__Bacilli	o__Bacillales	f__Bacillaceae	g__Bacillus	s__thuringiensis	Not tested	Not tested	Not tested	Not tested	0	0	0	0
AG77	3°49'07.6"N 77°01'58.5"W; Campo hermoso mangrove, Buenaventura, Valle del Cauca, Colombia	Avicennia germinans	Root	TSA	GAACATAAGGGGCATATGACTTGACGTCAYCCCCACC		100	37	Orenia sivashensis	k__Bacteria	p__Firmicutes	c__Clostridia	o__Halanaerobiales	f__Halobacteroidaceae	g__Orenia	s__sivashensis	Not tested	Not tested	Not tested	Not tested	0	0	0	0
AG79	3°49'07.6"N 77°01'58.5"W; Campo hermoso mangrove, Buenaventura, Valle del Cauca, Colombia	Avicennia germinans	Rhizosphere	TSA	TGCTGATCTGCGATTACTAGCGACTCCGACTTCATGAGGTCGAGTTGCAGACCTCAATCCGAACTGAGACCGGCTTTTTGGGATTAGCTCCACCTCACAGTATCGCAACCCCTTGT		100	116	Kocuria palustris	k__Bacteria	p__Actinobacteria	c__Actinobacteria	o__Actinomycetales	f__Micrococcaceae	g__Kocuria	s__palustris	Not tested	Not tested	Not tested	Not tested	0	0	0	0
AG81	3°49'07.6"N 77°01'58.5"W; Campo hermoso mangrove, Buenaventura, Valle del Cauca, Colombia	Avicennia germinans	Root	TSA	GATTAGATGAGCCGATGTCCGATTAGTTAGTTGGCGGGGTAATGGCCCACCAAGGCGACGATCGGTAGCTGGTCTGAGAGGATGATCAGCCACACTGGAACTGAGACACGGTCCAGACTCCTACGGGAGGCAGCAGTGGGGAATATTGGACAATGGGCGCAAGCCTGATCCAGCCATACCGCGTGGGTGAAGAAGGCCTTCGGGTTGTAAAGCCCTTTTGTTGGGAAAGAAA	PZ395023	100	232	Pseudoxanthomonas mexicana	k__Bacteria	p__Proteobacteria	c__Gammaproteobacteria	o__Xanthomonadales	f__Xanthomonadaceae	g__Pseudoxanthomonas	s__mexicana	Not tested	Not tested	Not tested	Not tested	0	0	0	0
AG85	3°49'07.6"N 77°01'58.5"W; Campo hermoso mangrove, Buenaventura, Valle del Cauca, Colombia	Avicennia germinans	Root	TSA	AAACTTACGCTAATACCGCATACGACCTTCGGGTGAAAGCAGGGGACCTTCGGGCCTTGCGCGGATAGATGAGCCGATGTCGGATTAGCTAGTTGGCGGGGTAAAGGCCCACCAAGGCGACGATCCGTAGCTGGTCTGAGAGGATGATCAGCCACACTGGAACTGAGACACGGTCCAGACTCCTACGGGAGGCAGCAGTGGGGAATATTGGACAATGGGCGCAAGCCTGATCCAGCCATACCGCGTGGGTGAAGAAGGCCTTCGGGTTGTAAAGCCCTTTTGTTGGGAAAGAAAAGCAATCGGCTAATACCCGGTTGTTCTGACGGTACC	PZ395024	100	330	Stenotrophomonas nematodicola	k__Bacteria	p__Proteobacteria	c__Gammaproteobacteria	o__Xanthomonadales	f__Xanthomonadaceae	g__Stenotrophomonas	s__nematodicola	Not tested	Not tested	Not tested	Not tested	0	0	0	0
AG86	3°49'07.6"N 77°01'58.5"W; Campo hermoso mangrove, Buenaventura, Valle del Cauca, Colombia	Avicennia germinans	Root	TSA	TGATTTAGCGGCGGACGGGTGAGTAATGCCTAGGAATCTGCCTGGTAGTGGGGGATAACGTTCCGAAAGGAACGCTAATACCGCGTACGTCCTACGGGAGAAAGCAGGGGACCTTCGGGCCTTGCGCTATCAGATGAGCCTAGGTCGGATTAGCTAGTTGGTGAGGTAATGGCTCACCAAGGCGACGATCCGTAACTGGTCTGAGAGGATGATCAGTCACACTGGAACTGAGACACGGTCCAGACTCCTACGGGAGGCAGCAGTGGGGAATATTGGACAATGGGCGAAAGCCTGATCCAGCCATGCCGCGTGTGTGAAGAAGGTCTTCGGATTGTAAAGCACTTTAAGTTGGGAGGAAGGGCAGTAAGTTAATACCTTGCTGTTTTGACGTTACCGACA…	PZ395025	100	425	Pseudomonas mendocina	k__Bacteria	p__Proteobacteria	c__Gammaproteobacteria	o__Pseudomonadales	f__Pseudomonadaceae	g__Pseudomonas	s__mendocina	Not tested	Not tested	Not tested	Not tested	0	0	0	0
AG87	3°49'07.6"N 77°01'58.5"W; Campo hermoso mangrove, Buenaventura, Valle del Cauca, Colombia	Avicennia germinans	Root	TSA	TTGCTACTTTTGCCGGCGAGCGGCGGACGGGTGAGTAATGCCTGGGAAATTGCCCAGTCGAGGGGGATAACAGTTGGAAACGACTGCTAATACCGCATACGCCCTACGGGGGAAAGCAGGGGACCTTCGGGCCTTGCGCGATTGGATATGCCCAGGTGGGATTAGCTAGTTGGTGAGGTAATGGCTCACCAAGGCGACGATCCCTAGCTGGTCTGAGAGGATGATCAGCCACACTGGAACTGAGACACGGTCCAGACTCCTACGGGAGGCAGCAGTGGGGAATATTGCACAATGGGGGAAACCCTGATGCAGCCATGCCGCGTGTGTGAAGAAGGCCTTCGGGTTGTAAAGCACTTTCAGCGAGGAGGAAAGGTCAGTAGCTAATATCTGCTGACTGTG…	PZ395026	98.2	1016	Aeromonas dhakensis	k__Bacteria	p__Proteobacteria	c__Gammaproteobacteria	o__Aeromonadales	f__Aeromonadaceae	g__Aeromonas	s__dhakensis	Not tested	Not tested	Not tested	Not tested	1	1	0	0
AG88	3°49'07.6"N 77°01'58.5"W; Campo hermoso mangrove, Buenaventura, Valle del Cauca, Colombia	Avicennia germinans	Root	TSA	TTCCCGAAGGCACCAATCCATCTCTGGAAAGTTCTCAGCATGTCAAGGCCAGGTAAGGTTCTTCGCGTTGCTTCGAATTAAACCACATGCTCCACCGCTTGTGCGGGCCCCCGTCAATTCATTTGAGTTTTAACCTTGCGGCCGTACTCCCCAGGCGGTCAACTTAATGCGTTAGCTGCGCCACTAAAATCTCAAGGATTCCAACGGCTAGTTGACATCGTTTACGGCGTGGACTACCAGGGTATCTAATCCTGTTTGCTCCCCACGCTTTCGCACCTCAGTGTCAGTATCAGTCCAGGTAGTCGCCTTCGCCACTGGTGTTCCTTCCTATATCTACGCATTTCACCGCTACACAGGAAATTCCACTACCCTCTACCGTACTCTAGCTCGCCAGTTTTG…	PZ395027	100	562	Pseudomonas oleovorans	k__Bacteria	p__Proteobacteria	c__Gammaproteobacteria	o__Pseudomonadales	f__Pseudomonadaceae	g__Pseudomonas	s__oleovorans	Not tested	Not tested	Not tested	Not tested	1	1	0	0
AG89	3°49'07.6"N 77°01'58.5"W; Campo hermoso mangrove, Buenaventura, Valle del Cauca, Colombia	Avicennia germinans	Root	TSA	GATTCAGCGGCGGACGGGTGAGTAATGCCTAGGAATCTGCCTGGTAGTGGGGGATAACGTTCCGAAAGGAACGCTAATACCGCATACGTCCTACGGGAGAAAGCAGGGGACCTTCGGGCCTTGCGCTATCAGATGAGCCTAGGTCGGATTAGCTAGTTGGTGAGGTAATGGCTCACCAAGGCGACGATCCGTAACTGGTCTGAGAGGATGATCAGTCACACTGGAACTGAGACACGGTCCAGACTCCTACGGGAGGCAGCAGTGGGGAATATTGGACAATGGGCGAAAGCCTGATCCAGCCATGCCGCGTGTGTGAAGAAGGTCTTCGGATTGTAAAGCACTTTAAGTTGGGAGGAAGGGCTGTAGGCTAATATCCTGCAGTTTTGACGTTACCAACAG…	PZ395028	99.3	1170	Pseudomonas oleovorans	k__Bacteria	p__Proteobacteria	c__Gammaproteobacteria	o__Pseudomonadales	f__Pseudomonadaceae	g__Pseudomonas	s__oleovorans	Not tested	Not tested	Not tested	Not tested	1	1	0	0
AG90	3°49'07.6"N 77°01'58.5"W; Campo hermoso mangrove, Buenaventura, Valle del Cauca, Colombia	Avicennia germinans	Root	TSA	CCTGATTTAGCGGCGGACGGGTGAGTAATGCCTAGGAATCTGCCTGGTAGTGGGGGATAACGTTCCGAAAGGAACGCTAATACCGCGTACGTCCTACGGGAGAAAGCAGGGGACCTTCGGGCCTTGCGCTATCAGATGAGCCTAGGTCGGATTAGCTAGTTGGTGAGGTAATGGCTCACCAAGGCGACGATCCGTAACTGGTCTGAGAGGATGATCAGTCACACTGGAACTGAGACACGGTCCAGACTCCTACGGGAGGCAGCAGTGGGGAATATTGGACAATGGGCGAAAGCCTGATCCAGCCATGCCGCGTGTGTGAAGAAGGTCTTCGGATTGTAAAGCACTTTAAGTTGG	PZ395029	96.9	354	Pseudomonas guguanensis	k__Bacteria	p__Proteobacteria	c__Gammaproteobacteria	o__Pseudomonadales	f__Pseudomonadaceae	g__Pseudomonas	s__guguanensis	Not tested	Not tested	Not tested	Not tested	1	1	0	0
AG91	3°49'07.6"N 77°01'58.5"W; Campo hermoso mangrove, Buenaventura, Valle del Cauca, Colombia	Avicennia germinans	Root	TSA	CGGACGGGTGAGTAATGCCTAGGAATCTGCCTGGTAGTGGGGGATAACGTTCCGAAAGGAACGCTAATACCGCGTACGTCCTACGGGAGAAAGCAGGGGACCTTCGGGCCTTGCGCTATCAGATGAGCCTAGGTCGGATTAGCTAGTTGGTGAGGTAATGGCTCACCAAGGCGACGATCCGTAACTGGTCTGAGAGGATGATCAGTCACACTGGAACTGAGACACGGTCCAGACTCCTACGGGAGGCAGCAGTGGGGAATATTGGACAATGGGCGAAAGCCTGA	PZ395030	95.8	284	Pseudomonas guguanensis	k__Bacteria	p__Proteobacteria	c__Gammaproteobacteria	o__Pseudomonadales	f__Pseudomonadaceae	g__Pseudomonas	s__guguanensis	Not tested	Not tested	Not tested	Not tested	0	0	0	0
AG95	3°49'07.6"N 77°01'58.5"W; Campo hermoso mangrove, Buenaventura, Valle del Cauca, Colombia	Avicennia germinans	Root	TSA	TGCTCCCGGATGTTAGCGGCGGACGGGTGAGTAACACGTGGGTAACCTGCCTGTAAGACTGGGATAACTCCGGGAAACCGGAGCTAATACCGGATAGTTCCTTGAACCGCATGGTTCAAGGATGAAAGACGGTTTCGGCTGTCACTTACAGATGGACCCGCGGCGCATTAGCTAGTTGGTGAGGTAACGGCTCACCAAGGCGACGATGCGTAGCCGACCTGAGAGGGTGATCGGCCACACTGGGACTGAGACACGCCCCCAACTCCTACGGGAGGCAGCAGTAGGGAATCTTCCGCAATGGA	PZ395031	100	302	Bacillus pumilus	k__Bacteria	p__Firmicutes	c__Bacilli	o__Bacillales	f__Bacillaceae	g__Bacillus	s__pumilus	Not tested	Not tested	Not tested	Not tested	0	0	0	0
AG96	3°49'07.6"N 77°01'58.5"W; Campo hermoso mangrove, Buenaventura, Valle del Cauca, Colombia	Avicennia germinans	Root	TSA	AGTAATGCCTAGGAATCTGCCTGGTAGTGGGGGACAACGTTTCGAAAGGAACGCTAATACCGCATACGTCCTACGGGAGAAAGTGGGGGATCTTCGGACCTCACGCTATCAGATGAGCCTAGGTCGGATTAGCTAGTTGGTGAGGTAAAGGCTCACCAAGGCGACGATCCGTAACTGGTCTGAGAGGATGATCAGTCACACTGGAACTGAGACACGGTCCAGACTCCTACGGGAGGCAGCAGTGGGGAATATTGGACAATGGGCGAAAGCCTGATCCAGCCATGCCGCGTGTGTGAAGAAGGTCTTCGGATTGTAAAGCACTTTAAGTTGGGAGGAAGGGCAGTAAGTTAATACCTTGCTGTTTTGACGTTACCAACAGAATAAGCACCGGCTAACTTC…	PZ395032	98.7	1137	Pseudomonas stutzeri	k__Bacteria	p__Proteobacteria	c__Gammaproteobacteria	o__Pseudomonadales	f__Pseudomonadaceae	g__Pseudomonas	s__stutzeri	Not tested	Not tested	Not tested	Not tested	0	0	0	0
AG97	3°49'07.6"N 77°01'58.5"W; Campo hermoso mangrove, Buenaventura, Valle del Cauca, Colombia	Avicennia germinans	Rhizosphere	TSA													Not tested	Not tested	Not tested	Not tested	0	0	0	0
AG98	3°49'07.6"N 77°01'58.5"W; Campo hermoso mangrove, Buenaventura, Valle del Cauca, Colombia	Avicennia germinans	Rhizosphere	TSA	GAATAGCTCCGGGAAACTGGAATTAATACCGCATACGCCCTACGGGGGAAAGATTTATCGGGGAAGGATTGGCCCGCGTTGGATTAGCTAGTTGGTGGGGTAAAGGCCTACCAAGGCGACGATCCATAGCTGGTCTGAGAGGATGATCAGCCACATTGGGACTGAGACACGGCCCAAACTCCTACGGGAGGCAGCAGTGGGGAATATTGGACAATGGGCGCAAGCCTGATCCAGCCATGCCGCGTGAGTGATGAAGGCCTTAGGGTTGTAAAGCTCTTTCACCGATGAAGATAATGACGGTAGTCGGAGAAGAAGCCCCGGCTAACTTCGTGCCAGCAGCCGCGGTAATACGAAGGGGGCTAGCGTTGTTCGGAATTACTGGGCGTAAAGCGCACGTAG…	PZ395033	100	497	Agrobacterium salinitolerans	k__Bacteria	p__Proteobacteria	c__Alphaproteobacteria	o__Rhizobiales	f__Rhizobiaceae	g__Agrobacterium	s__salinitolerans	Not tested	Not tested	Not tested	Not tested	0	0	0	0
AG99	3°49'07.6"N 77°01'58.5"W; Campo hermoso mangrove, Buenaventura, Valle del Cauca, Colombia	Avicennia germinans	Root	TSA	CTTTGACGTTAGCGGCGGACGGGTGAGTAACACGTGGGCAACCTACCTTATAGTTTGGGATAACTCCGGGAAACCGGGGCTAATACCGAATAATCTATTTTACTTCATGGTGAAATACTGAAAGACGGTTTCGGCTGTCGCTATAAGATGGGCCCGCGGCGCATTAGCTAGTTGGTGAGGTAACGGCTCACCAAGGCGACGATGCGTAGCCGACCTGAGAGGGTGATCGGCCACACTGGGACTGAGACACGGCCCAGACTCCTACGGGAGGCAGCAGTAGGGAATCTTCCACAATGGGCGAAAGCCTGATGGAGCAACGCCGCGTGAGTGAAGAAGGTTTTCGGATCGTAAAACTCTGTTGTAAGGGAAGAACAAGTACAGTAGTAACTGGCTGTACCT…	PZ395034	93.4	676	Lysinibacillus fusiformis	k__Bacteria	p__Firmicutes	c__Bacilli	o__Bacillales	f__Planococcaceae	g__Lysinibacillus	s__fusiformis	Not tested	Not tested	Not tested	Not tested	0	0	0	0
AG100	3°49'07.6"N 77°01'58.5"W; Campo hermoso mangrove, Buenaventura, Valle del Cauca, Colombia	Avicennia germinans	Root	TSA	ACCGCGGCATGCTGATCCGCGATTACTAGCGATTCCGCCTTCACGCTCTCGAGTTGCAGAGAACGATCCGAACTGAGACGACTTTTGGAGATTAGCTCCCTCTCGCGAGGTGGCTGCCCACTGTAGTCGCCATTGTAGCACGTGTGTAGCCCAACGCGTAAGGGCCATGAGGACTTGACGTCATCCCCACCTTCCTCCGGCTTATCACCGGCGGTTCCTTTAGAGTACCCAACTAAATGCTGGCAACTAAAGGCGAGGGTTGCGCTCGTTGCGGGACTTAACCCAACATCTCACGACACGAGCTGACGACAGCCATGCAGCACCTGTCACCTATCCAG	PZ395035	92	338	Sphingobium yanoikuyae	k__Bacteria	p__Proteobacteria	c__Alphaproteobacteria	o__Sphingomonadales	f__Sphingomonadaceae	g__Sphingobium	s__yanoikuyae	Not tested	Not tested	Not tested	Not tested	0	0	0	0
AG101																	Not tested	Not tested	Not tested	Not tested	0	0	0	0
AG102	3°49'07.6"N 77°01'58.5"W; Campo hermoso mangrove, Buenaventura, Valle del Cauca, Colombia	Avicennia germinans	Root	TSA	TAGCATGCTGATCTACGATTACTAGCGATTCCAGCTTCATATAGTCGAGTTGCAGACTACAATCCGAACTGAGAACAACTTTATGGGATTTGCTTGACCTCGCGGTTTCGCTGCCCTTTGTATTGTCCATTGTAGCACGTGTGTAGCCCAAATCATAAGGGGCATGATGATTTGACGTCATCCCCACCTTCCTCCGGTTTGTCACCGGCAGTCAACTTAGAGTGCCCAACTTAATGATGGCAACTAAGCTTAATGGTTGGGGTCGTTGCGGGACTTAACCCA	PZ395036	90.5	282	Staphylococcus epidermidis	k__Bacteria	p__Firmicutes	c__Bacilli	o__Staphylococcales	f__Staphylococcaceae	g__Staphylococcus	s__epidermidis	Not tested	Not tested	Not tested	Not tested	0	0	0	0
AG104	3°49'07.6"N 77°01'58.5"W; Campo hermoso mangrove, Buenaventura, Valle del Cauca, Colombia	Avicennia germinans	Root	TSA	AACCGGCTTTTTGGGATTCGCTCCACCTTGCGGTATCGCAACCCTTTGTACCGGCCATTGTA		100	62	Kribbella catacumbae	k__Bacteria	p__Actinobacteriota	c__Actinobacteria	o__Propionibacteriales	f__Nocardioidaceae	g__Kribbella	s__catacumbae	Not tested	Not tested	Not tested	Not tested	0	0	0	0
RM01	3°49'07.6"N 77°01'58.5"W; Campo hermoso mangrove, Buenaventura, Valle del Cauca, Colombia	Rhizophora mangle	Stem	TSA	ATGTTAGCGGCGGACGGGTGAGTAACACGTGGGTAACCTGCCTGTAAGACTGGGATAACTCCGGGAAACCGGAGCTAATACCGGATAGTTCCTTGAACCGCATGGTTCAAGGATGAAAGACGGTTTCGGCTGTCACTTACAGATGGACCCGCGGCGCATTAGCTAGTTGGTGAGGTAACGGCTCACCAAGGCGACGATGCGTAGCCGACCTGAGAGGGTGATCGGCCACACTGGGACTGAGACACGGCCCAGACTCCTACGGGAGGCAGCAGTAGGGAATCTTCCGCAATGGACGAAAGTCTGACGGAGCAACGCCGCGTGAGTGATGAAGGTTTTCGGATCGTAAAGCTCTGTTGTTAGGGAAGAACAAGTGCAAGAGTAACTGCTTGCAC	PZ395037	100	392	Bacillus stratosphericus	k__Bacteria	p__Firmicutes	c__Bacilli	o__Bacillales	f__Bacillaceae	g__Bacillus	s__stratosphericus	Not tested	Not tested	Not tested	Not tested	0	0	1	2
RM02	3°49'07.6"N 77°01'58.5"W; Campo hermoso mangrove, Buenaventura, Valle del Cauca, Colombia	Rhizophora mangle	Root	TSA	GGCATGCTGATCCGCGATTACTAGCGATTCCAGCTTCATGTAGGCGAGTTGCAGCCTACAATCCGAACTGAGAACGGTTTTATGAGATTAGCTCCACCTCGCGGTCTTGCAGCTCTTTGTACCGTCCATTGTAGCACGTGTGTAGCCCAGGTCATAAGGGGCATGATGATTTGACGTCATCCCCACCTTCCTCCGGTTTGTCACCGGCAGTCACCTTAGAGTGCCCAACTTAATGATGGCAACTAAGATCAAGGGTTGCGCTCGTTGCGGGACTTAACTCCAACATCTCACGACACGAGCTGACGACAACCATGCACCACCTGTCACTCTGCTCCCGAAGGAGAAGCCCTATCTCTAGGGTTTTCAGAGGATGTCAAGACCTGGTAAGGTTCTTCGCTG…	PZ395038	100	482	Bacillus cereus	k__Bacteria	p__Firmicutes	c__Bacilli	o__Bacillales	f__Bacillaceae	g__Bacillus	s__cereus	Not tested	Not tested	Not tested	Not tested	0	0	0	0
RM03	3°49'07.6"N 77°01'58.5"W; Campo hermoso mangrove, Buenaventura, Valle del Cauca, Colombia	Rhizophora mangle	Stem	TSA	AGCGGCGGACGGGTGAGTAACACGTGGGTAACCTGCCTGTAAGACTGGGATAACTCCGGGAAACCGGAGCTAATACCGGATAGTTCCTTGAACCGCATGGTTCAAGGATGAAAGACGGTTTCGGCTGTCACTTACAGATGGACCCGCGGCGCATTAGCTAGTTGGTGAGGTAACGGCTCACCAAGGCGACGATGCGTAGCCGACCTGAGAGGGTGATCGGCCACACTGGGACTGAGACACGGCCCAGACTCCTACGGGAGGCAGCAGTAGGGAATCTTCCGCAATGGACGAAAGTCTGACGGAGCAACGCCGCGTGAGTGATGAAGGTTTTCGGATCGTAAAGCTCTGTTGTTAGGGAAGAACAAGTGCAAGAGTAACTGCTTGCACCTTGACGGTACC…	PZ395039	99.5	1135	Bacillus pumilus	k__Bacteria	p__Firmicutes	c__Bacilli	o__Bacillales	f__Bacillaceae	g__Bacillus	s__pumilus	Not tested	Not tested	Not tested	Not tested	0	0	1	2
RM04	3°49'07.6"N 77°01'58.5"W; Campo hermoso mangrove, Buenaventura, Valle del Cauca, Colombia	Rhizophora mangle	Stem	TSA	AGCGGCGGACGGGTGAGTAACACGTGGGTAACCTGCCTGTAAGACTGGGATAACTCCGGGAAACCGGGGCTAATACCGGATGCTTGTTAGA		100	91	Bacillus atrophaeus	k__Bacteria	p__Firmicutes	c__Bacilli	o__Bacillales	f__Bacillaceae	g__Bacillus	s__atrophaeus	Not tested	Not tested	Not tested	Not tested	0	0	2	0
RM05	3°49'07.6"N 77°01'58.5"W; Campo hermoso mangrove, Buenaventura, Valle del Cauca, Colombia	Rhizophora mangle	Stem	TSA	TACTAGCAATTCCGACTTCATGCAGGCGAGTTGCAGCCTGCAATCCGAACTGAGACTGGCTTTTATAGGATTGGCTCCACCTCGCGGCTTCGCTTCCCGTTGTACCAGCCATTGTAGTACGTGTGTAGCCCAAGTCATAAGGGGCATGATGATTTGACGTCATCCCCGCCTTCCTCCGGTTTGTCACCGGCAGTCATTCTAGAGTGCCCACCC	PZ395040	100	213	Paenibacillus lautus	k__Bacteria	p__Firmicutes	c__Bacilli	o__Paenibacillales	f__Paenibacillaceae	g__Paenibacillus	s__lautus	Not tested	Not tested	Not tested	Not tested	0	0	0	0
RM06	3°49'07.6"N 77°01'58.5"W; Campo hermoso mangrove, Buenaventura, Valle del Cauca, Colombia	Rhizophora mangle	Stem	TSA	GACGGGTGAGTAACACGTAGGCAACCTGCCCTCAAGACTGGGATAACTACCGGAAACGGTAGCTAATACCGGATAATTTATTTTGCAGCATTGTGAAATAATGAAAGGCGGAGCAATCTGTCACTTGAGGATGGGCCTGCGGCGCATTAGCTAGTTGGTGGGGTAACGGCCCACCAAGGCGACGATGCGTAGCCGACCTGAGAGGGTGAACGGCCACACTGGGACTGAGACACGGCCCAGACTCCTACGGGAGGCAGCAGTAGGGAATCTTCCGCAATGGGCGAAAGCCTGACGGAGCAACGCCGCGTGAGTGATGAAGGTTTTCGGATCGTAAAGCTCTGTTGCCAAGGAAGAACGTCTTCTAGAGTAACTGCTAGGAGAGTGACGGTACTTGAGAAG…	PZ395041	100	431	Paenibacillus lautus	k__Bacteria	p__Firmicutes	c__Bacilli	o__Paenibacillales	f__Paenibacillaceae	g__Paenibacillus	s__lautus	Not tested	Not tested	Not tested	Not tested	0	0	0	0
RM07	3°49'07.6"N 77°01'58.5"W; Campo hermoso mangrove, Buenaventura, Valle del Cauca, Colombia	Rhizophora mangle	Stem	TSA	GCATGCTGATTCCGCGAATAACTAGCAACTCCGACTTTCATGGGGGCG		91.7	48	Collinsella aerofaciens	k__Bacteria	p__Actinobacteria	c__Coriobacteriia	o__Coriobacteriales	f__Coriobacteriaceae	g__Collinsella	s__aerofaciens	Not tested	Not tested	Not tested	Not tested	0	0	0	0
RM08	3°49'07.6"N 77°01'58.5"W; Campo hermoso mangrove, Buenaventura, Valle del Cauca, Colombia	Rhizophora mangle	Stem	TSA	GATTAGCGGCGGACGGGTGAGTAACACGTGGGCAACCTGCCTATAAGACTGGGATAACTTCGGGAAACCGGAGCTAATACCGGATACGTTCTTTTCTCGCATGAGAGAAGATGGAAAGACGGTTTCTGCTGTCACTTATAGATG		93.7	307	Peribacillus frigoritolerans	k__Bacteria	p__Firmicutes	c__Bacilli	o__Bacillales	f__Bacillaceae	g__Peribacillus	s__frigoritolerans	Not tested	Not tested	Not tested	Not tested	0	0	0	0
RM09	3°49'07.6"N 77°01'58.5"W; Campo hermoso mangrove, Buenaventura, Valle del Cauca, Colombia	Rhizophora mangle	Stem	TSA	GAATWACTAGCGAATTCCAGCTTCATGTAGGCGAGTTGCAGCCTACAATCCGAACTGAGAACGGTTTTATGAGATTAGCTCCACCTCGCGGTCTTGCAGCTCTTTGTACCGTCCATTGTAGCACGTGTGTAGCCCAGGTCATAAGGGGCATGATGATTTGACGTCATCCCCACCTTCCTCCGGTTTGTCACCGGCAGTCACCTTAGAGTGCCCAACTTAATGATGGCAACTAAGATCAAGGGTTGCGCTCGTTGCGGGACTTA	PZ395042	92.3	263	Bacillus thuringiensis	k__Bacteria	p__Firmicutes	c__Bacilli	o__Bacillales	f__Bacillaceae	g__Bacillus	s__thuringiensis	Not tested	Not tested	Not tested	Not tested	0	0	0	0
RM10	3°49'07.6"N 77°01'58.5"W; Campo hermoso mangrove, Buenaventura, Valle del Cauca, Colombia	Rhizophora mangle	Rhizosphere	TSA	GCATGCTGATCCGCGATACTAGCGATTCCAGCTTCATGTAGGCGAGTTGCAGCCTACAATCCGAACTGAGAACGGTTTTATGAGATTAGCTCCACCTCGCGG		96.1	102	Bacillus cereus	k__Bacteria	p__Firmicutes	c__Bacilli	o__Bacillales	f__Bacillaceae	g__Bacillus	s__cereus	Not tested	Not tested	Not tested	Not tested	0	2	0	0
RM11	3°49'07.6"N 77°01'58.5"W; Campo hermoso mangrove, Buenaventura, Valle del Cauca, Colombia	Rhizophora mangle	Rhizosphere	TSA	TTCTGATTCACGATTACTAGCGATTCCGACTTCATGGAGTCGAGTTGCAGACTCCAATCCGGACTACGACGCACTTTTTGGGATTCGCTCACTTTCGCAAGTTGGCCGCCCTCTGTATGCGCCATTGTAGCACGTGTGTAGCCCTACTCGTAAGGGCCATGATGACTTGACGTCGTCCCCACCTTCCTCCGGTTTATCACCGGCAGTCTCCCTGGAGTTCCCGACAT	PZ395043	96.5	227	Vibrio fluvialis	k__Bacteria	p__Proteobacteria	c__Gammaproteobacteria	o__Vibrionales	f__Vibrionaceae	g__Vibrio	s__fluvialis	Not tested	Not tested	Not tested	Not tested	0	0	0	0
RM12	3°49'07.6"N 77°01'58.5"W; Campo hermoso mangrove, Buenaventura, Valle del Cauca, Colombia	Rhizophora mangle	Rhizosphere	TSA	TTCTGATTCACGATTACTAGCGATTCCGACTTCATGGAGTCGAGTTGCAGACTCCAATCCGGACTACGACGCACTTTTTGGGATTCGCTCACTTTCGCAAGTTGGCCGCCCTCTGTATGCGCCATTGTAGCACGTGTGTAGCCCTACTCGTAAGGGCCATGATGACTTGACGTCGTCCCCACCTTCCTCCGGTTTATCACCGGCAGTCTCCCTGGAGTTCCCGACATTACTCGCTGGCAAACAAGGATAAGGGTTGCGCTCGTTGCGGGACTTAACCCAACATTTCACAACACGAGCTGACGACAGCCATGCAGCACCTGTCTCAGAGTTCCCGAAGGCACCAAAGCATCTCTGCTAAGTTCTCTGGATGTCAAGAGTAGGTAAGGTTCTTCGCGTTGC…	PZ395044	97.7	512	Vibrio fluvialis	k__Bacteria	p__Proteobacteria	c__Gammaproteobacteria	o__Vibrionales	f__Vibrionaceae	g__Vibrio	s__fluvialis	Not tested	Not tested	Not tested	Not tested	0	0	0	0
RM13	3°49'07.6"N 77°01'58.5"W; Campo hermoso mangrove, Buenaventura, Valle del Cauca, Colombia	Rhizophora mangle	Rhizosphere	TSA	GGCATGCTGATCCGCGATACTAGCGATTCCAGCTTCATGTAGGCGAGTTGCAGCCTACAATCCGAACTGAGAACGGTTTTATGA		95.2	84	Bacillus cereus	k__Bacteria	p__Firmicutes	c__Bacilli	o__Bacillales	f__Bacillaceae	g__Bacillus	s__cereus	Not tested	Not tested	Not tested	Not tested	0	0	0	0
RM14	3°49'07.6"N 77°01'58.5"W; Campo hermoso mangrove, Buenaventura, Valle del Cauca, Colombia	Rhizophora mangle	Rhizosphere	TSA	ATTCCGGTGACATTCTGATTCACGATTACTAGCGATTCCGACTTCATGGAGTCGAGTTGCAGACTCCAATCCGGACTACGACGCACTTTTTGGGATTCGCTCACTTTCGCAAGTTGGCCG		90.9	120	Vibrio fluvialis	k__Bacteria	p__Proteobacteria	c__Gammaproteobacteria	o__Vibrionales	f__Vibrionaceae	g__Vibrio	s__fluvialis	Not tested	Not tested	Not tested	Not tested	0	0	0	0
RM15	3°49'07.6"N 77°01'58.5"W; Campo hermoso mangrove, Buenaventura, Valle del Cauca, Colombia	Rhizophora mangle	Rhizosphere	TSA	ACACAGTCCAAACTCCTACGGGAGGCAGCAAATGAGGAATATT		95.3	43	Stenotrophomonas rhizophila	k__Bacteria	p__Proteobacteria	c__Gammaproteobacteria	o__Xanthomonadales	f__Xanthomonadaceae	g__Stenotrophomonas	s__rhizophila	Not tested	Not tested	Not tested	Not tested	0	0	0	0
RM16	3°49'07.6"N 77°01'58.5"W; Campo hermoso mangrove, Buenaventura, Valle del Cauca, Colombia	Rhizophora mangle	Rhizosphere	TSA	GATTCCAGCTTCATGTAGGCGAGTTGCAGCCTACAATCCGAACTGAGAACGGTTTTATGAGATTAGCTCCACCTCGCGGTCTTGCAGCTCTTTGTACCGTCCATTGTAGCACGTGTGTAGCCCAGGTCATAAGGGGCATGATGATTTGACGTCATCCCCACCTTCCTCCGGTTTGTCACCGGCAGTCACCTTAAAGTGCCCAACTTAATGATGGCAACTAAGATCAAGGGTTGCGCTCGTTGCGGGACTTAACCCAACATCTCACGACACGAGCTGACGACAACCATGCACCACCTGTCACTCTGCTCCCGAAGGAGAAGCTCTATCTCTAGAGTTTTCAGAGGATGTCAAGACCTGGTAAGGTTCTTCGCGTTGCTTCGAATTAAACCACATGCTCCA…	PZ395045	96.6	409	Bacillus cereus	k__Bacteria	p__Firmicutes	c__Bacilli	o__Bacillales	f__Bacillaceae	g__Bacillus	s__cereus	Not tested	Not tested	Not tested	Not tested	0	0	0	0
RM17	3°49'07.6"N 77°01'58.5"W; Campo hermoso mangrove, Buenaventura, Valle del Cauca, Colombia	Rhizophora mangle	Rhizosphere	TSA													Not tested	Not tested	Not tested	Not tested	0	0	0	0
RM23	3°49'07.6"N 77°01'58.5"W; Campo hermoso mangrove, Buenaventura, Valle del Cauca, Colombia	Rhizophora mangle	Rhizosphere	TSA	TCACCGTGGCATTCTGATTCCACGATTACTAGCGATTCCGACTTCCATGGAGTCGAGTTGCAGACTCCAATCCGGACT		100	78	Salmonella enterica	k__Bacteria	p__Proteobacteria	c__Gammaproteobacteria	o__Enterobacterales	f__Enterobacteriaceae	g__Salmonella	s__enterica	Not tested	Not tested	Not tested	Not tested	0	0	0	0
RM26	3°49'07.6"N 77°01'58.5"W; Campo hermoso mangrove, Buenaventura, Valle del Cauca, Colombia	Rhizophora mangle	Rhizosphere	TSA	GATTACTAGCGATTCCGACTTCATGGAGTCGAGTTGCAGACTCCAATCCGGACTACAACGCACTTTTTGGGATTCGCTCACTTTCGCAAGTTGGCCGCCCTCTGTATGCGCCA		100	113	Vibrio sagamiensis	k__Bacteria	p__Proteobacteria	c__Gammaproteobacteria	o__Vibrionales	f__Vibrionaceae	g__Vibrio	s__sagamiensis	Not tested	Not tested	Not tested	Not tested	0	0	0	0
RM27	3°49'07.6"N 77°01'58.5"W; Campo hermoso mangrove, Buenaventura, Valle del Cauca, Colombia	Rhizophora mangle	Rhizosphere	TSA	CTTCGGGGGATTTGTTGGGCGGCGAGCGGCGGACGGGTGAGTAATGCCTGGGAAATTGCCCTGATGTGGGGGATAACCATTGGAAACGATGGCTAATACCGC		95.1	102	Vibrio furnissii	k__Bacteria	p__Proteobacteria	c__Gammaproteobacteria	o__Vibrionales	f__Vibrionaceae	g__Vibrio	s__furnissii	Not tested	Not tested	Not tested	Not tested	0	0	0	0
RM29	3°49'07.6"N 77°01'58.5"W; Campo hermoso mangrove, Buenaventura, Valle del Cauca, Colombia	Rhizophora mangle	Rhizosphere	TSA	CGCGATTACTAGCGATTCCAGCTTCATGTAGGCGAGTTGCAGCCTACAATCCGAACTGAGAACGGTTTTATGAGATTAGCTCCACCTCGCGGTCTTGCAGCTCTTTGTACCGTCCATTGTAGCACGTGTGTAGCCCAGGTCATAAGGGGCATGATGATTTGACGTCATCCCCACCTTCCTCCGGTTTGTCACCGGCAGTCACCTTAGAGTGCCCAACTTAATGATGGCAACTAAGATCAAGGGTTGCGCTCGTTGCGGGACTTAACCCAACATCTCACGACACGAGCTGACGACAACCATGCACCACCTGTCACTCTGCTCCCGAAGGAGAAGCCCTATCTCTAGGGTTTTCAGAGGATGTCAAGACCTGGTAAGGTTCTTCGCGTTGCTTCGAATTAA…	PZ395046	98.5	535	Bacillus thuringiensis	k__Bacteria	p__Firmicutes	c__Bacilli	o__Bacillales	f__Bacillaceae	g__Bacillus	s__thuringiensis	Not tested	Not tested	Not tested	Not tested	0	0	0	0
RM30	3°49'07.6"N 77°01'58.5"W; Campo hermoso mangrove, Buenaventura, Valle del Cauca, Colombia	Rhizophora mangle	Rhizosphere	TSA	TGAGAGCTTGCTCTCATGAAGTTAGCGGCGGACGGGTGAGTAACACGTGGGTAACCTGCCCATAAGACTGGGATAACTCCGGGAAACCGGGGCTAATACCGGATAACATTTTGAACTGCATGGTTCGAAATTGAAAGGCGGCTTCGGCTGTCACTTATGGATGGACCCGCGTCGCATTATCTAGTTGGTGAGGTAACGGCTCACCAAGGCAACGATGCGTAGCCGACCTGAGAGGGTGATCGGCCACACTGGGACTGAGACACGGCCCAGACTCCTACGGGAGGCAGCAGTAGGGAATCTTCCGCAATGGACGAAAGTCTGACGGAGCAACGCCGCGTGAGTGATGAAGGCTTTCGGGTCGTAAAACTCTGTTGTTAGGGAAGAACAAGTGCTAGTTGA…	PZ395047	95.5	556	Bacillus cereus	k__Bacteria	p__Firmicutes	c__Bacilli	o__Bacillales	f__Bacillaceae	g__Bacillus	s__cereus	Not tested	Not tested	Not tested	Not tested	0	0	0	0
RM31	3°49'07.6"N 77°01'58.5"W; Campo hermoso mangrove, Buenaventura, Valle del Cauca, Colombia	Rhizophora mangle	Rhizosphere	TSA	GCGGCATGGTGATCCGCGATTACTAGCGATTCCAGCTTCATGGAGGCGAGTTGCAGCCTACAATCCGAACTGAGAACGGTT		100	81	Bacillus cereus	k__Bacteria	p__Firmicutes	c__Bacilli	o__Bacillales	f__Bacillaceae	g__Bacillus	s__cereus	Not tested	Not tested	Not tested	Not tested	0	0	0	0
RM34	3°49'07.6"N 77°01'58.5"W; Campo hermoso mangrove, Buenaventura, Valle del Cauca, Colombia	Rhizophora mangle	Rhizosphere	TSA	GCTCTTATGAAGTTAGCGGCGGACGGGTGAGTAACACGTGGGTAACCTGCCCATAAGACTGGGATAACTCCGGGAAACCGGGGCTAATACCGGATAACATTTTGAACCGCATGGTTCGAAATTGAAAGGCGGCTTCGGCTGTCACTTATGGATGGACCCGCGTCGCATTAGCTAGTTGGTGAGGTAACGGCTCACCAAGGCAACGATGCGTAGCCGACCTGAGAGGGTGATCGGCCACACTGGGACTGAGACACGGCCCAGACTCCTACGGGAGGCAGCAGTAGGGAATCTTCCGCAATGGACGAAAGTCTGACGGAGCAACGCCGCGTGAGTGATGAAGGCTTTCGGGTCGTAAAACTCTGTTGTTAGGGAAGAACAAGTGCTAGTTGAATAAGCTGG…	PZ395048	99.6	1121	Bacillus cereus	k__Bacteria	p__Firmicutes	c__Bacilli	o__Bacillales	f__Bacillaceae	g__Bacillus	s__cereus	Not tested	Not tested	Not tested	Not tested	0	0	0	0
RM40	3°49'07.6"N 77°01'58.5"W; Campo hermoso mangrove, Buenaventura, Valle del Cauca, Colombia	Rhizophora mangle	Rhizosphere	TSA	TTCGGGGGGAAGTCGACGGAATGAGCGGCGGACGGGTGAGTAACACGTAAAGAACCTGCCCTCAGGTCTGGGATAACCACGAGAAATCGGGGCTAATACCGGATGGGTCATCGGACCGCATGGTCCGAGGATGAAAGGCGCTTCGGCGTCGCCTGGGGATGGCTTTGCGGTGCATTAGCTAGTTGGTGGGGTAATGGCCCACCAAGGCGACGATGCATAGCCGACCTGAGAGGGTGATCGGCCACACTGGGACTGAGACACGGCCCAGACTCCTACGGGAGGCAGCAGTAGGGAATCTTCCACAATGGACGAAAGTCTGATGGAGCAACGCCGCGTGAACGATGAAGGCCTTCGGGTCGTAAAGTTCTGTTGTAAGGGAAGAACAAGTGCCGCAGGCAA…	PZ395049	98.8	1019	Exiguobacterium mexicanum	k__Bacteria	p__Firmicutes	c__Bacilli	o__Bacillales	f__Bacillales_Incertae Sedis XII	g__Exiguobacterium	s__mexicanum	Not tested	Not tested	Not tested	Not tested	0	0	0	0
RM44	3°49'07.6"N 77°01'58.5"W; Campo hermoso mangrove, Buenaventura, Valle del Cauca, Colombia	Rhizophora mangle	Rhizosphere	TSA	CTTTCGGGGGATTTGTTGGGCGGCGAGCGGCGGACGGGTGAGTAATGCCTGGGAAATTGCCCTGATGTGGGGGATAACCATTGGAAACGATGGCTAATACCGCATGATAGCTTCGGCTCAAAGAGGGGGACCTTCGGGCCTCTCGCGTCAGGATATGCCCAGGTGGGATTAGCTAGTTGGTGAGGTAAGGGCTCACCAAGGCGACGATCCCTAGCTGGTCTGAGAGGATGATCAGCCACACTGGAACTGAGACACGGTCCAGACTCCTACGGGA	PZ395050	92.7	274	Vibrio fluvialis	k__Bacteria	p__Proteobacteria	c__Gammaproteobacteria	o__Vibrionales	f__Vibrionaceae	g__Vibrio	s__fluvialis	Not tested	Not tested	Not tested	Not tested	0	0	0	0
RM46	3°49'07.6"N 77°01'58.5"W; Campo hermoso mangrove, Buenaventura, Valle del Cauca, Colombia	Rhizophora mangle	Root	TSA	ATTGAAAGGCGGCTTCGGCTGTCACTTATGGATGGACCCGCGTCCCATTAGCTAGTTGGTGAGGTAACGGCTCACCAAGGCAACGATGCGTAGCCGACCTGAGAGGGTGATCGGCCACACTGGGACTGACACACGGCCCAGACTCCTACGGGAGGCAGCAGTAGGGAATCTTCCGCAATGGACGAAAGTCTGACGGAGCAACGCCGCGTGAGTGATGAAGGCTTTCGGGTCGTAAAACTCTGTTGTTAGGGAAGAACAAGTGCTAGTTGAATAAGCTGGCACCTTGACGGTACCTAACCAGAAAGCCACGGCTAACTACGTGCCAGCATCCGCGGTAATACGTAGGTGGCAAGCGTTATCCGGAATTATTGGGCGTAA	PZ395051	100	378	Bacillus cereus	k__Bacteria	p__Firmicutes	c__Bacilli	o__Bacillales	f__Bacillaceae	g__Bacillus	s__cereus	Not tested	Not tested	Not tested	Not tested	0	0	0	0
RM47	3°49'07.6"N 77°01'58.5"W; Campo hermoso mangrove, Buenaventura, Valle del Cauca, Colombia	Rhizophora mangle	Root	TSA	GGGGCTTGCTCCGGATGTTAGCGGCGGACGGGTGAGTAACACGTGGGTAACCTGCCTGTAAGACTGGGATAACTCCGGGAAACCGGAGCTAATACCGGATAGTTCCTTGAACCGCATGGTTCAAGGATGAAAGACGGTTTCGGCTGTCACTTACAGATGGACCCGCGGCGCATTAGCTAGTTGGTGAGGTAACGGCTCACCAAGGCGACGATGCGTAGCCGACCTGAGAGGGTGATCGGCCACACTGGGACTGAGACACGGCCCAGACTCCTACGGGAGGCAGCAGTAGGGAATCTTCCGCAATGGACGAAAGTCTGACGGAGCAACGCCGCGTGAGTGATGAAGGTTTTCGGATCGTAAAGCTCTGTTGTTAGGGAAGAACAAGTGCAAGAGTAACTG…	PZ395052	97.8	554	Bacillus aerophilus	k__Bacteria	p__Firmicutes	c__Bacilli	o__Bacillales	f__Bacillaceae	g__Bacillus	s__aerophilus	Not tested	Not tested	Not tested	Not tested	0	0	0	0
RM48	3°49'07.6"N 77°01'58.5"W; Campo hermoso mangrove, Buenaventura, Valle del Cauca, Colombia	Rhizophora mangle	Root	TSA	GTTAGCGGCGGACGGGTGAGTAACACGTGGATAACCTACCTATAAGACTGGGATAACTTCGGGAAACCGGAGCTAATACCGGATAATATATTGAACCGCATGGTTCAATAGTGAAAGACGGTTTTGCTGTCACTTATAGATGGATCCGCGCCGCATTAGCTAGTTGGTAAGGTAACGGCTTACCAAGGCAACGATGCGTAGCCGACCTGAGAGGGTGATCGGCCACACTGGAACTGAGACACGGTCCAGACTCCTACGGGAGGCAGCAGTAGGGAATCTTCCGCAATGGGCGAAAGCCTGACGGAGCAACGCCGCGTGAGTGATGAAGGTCTTCGGATCGTAAAACTCTGTTATTAGGGAAGAACAAATGTGTAAGTAACTATGCACGTCTTGACGGTA…	PZ395053	97.8	802	Staphylococcus epidermidis	k__Bacteria	p__Firmicutes	c__Bacilli	o__Staphylococcales	f__Staphylococcaceae	g__Staphylococcus	s__epidermidis	Not tested	Not tested	Not tested	Not tested	0	0	0	0
RM49	3°49'07.6"N 77°01'58.5"W; Campo hermoso mangrove, Buenaventura, Valle del Cauca, Colombia	Rhizophora mangle	Root	TSA	AGCGGCGGACGGGTGAGTAACACGTGGATAACCTACCTATAAGACTGGGATAACTTCGGGAAACCGGAGCTAATACCGGATAATATATTGAACCGCATGGTTCAATAGTGAAAGACGGTTTTGCTGTCACTTATAGATGGATCCGCGCCGCATTAGCTAGTTGGTAAGGTAACGGCTTACCAAGGCAACGATGCGTAGCCGACCTGAGAGGGTGATCGGCCACACTGGAACTGAGACACGGTCCAGACTCCTACGGGAGGCAGCAGTAGGGAATCTTCCGCAATGGGCGAAAGCCTGACGGAGCAACGCCGCGTGAGTGATGAAGGTCTTCGGATCGTAAAACTCTGTTATTAGGGAAGAACAAATGTGTAAGTAACTATGCACGTCTTGACGGTACCT…	PZ395054	96.4	1039	Staphylococcus epidermidis	k__Bacteria	p__Firmicutes	c__Bacilli	o__Staphylococcales	f__Staphylococcaceae	g__Staphylococcus	s__epidermidis	Not tested	Not tested	Not tested	Not tested	0	0	0	0
RM50	3°49'07.6"N 77°01'58.5"W; Campo hermoso mangrove, Buenaventura, Valle del Cauca, Colombia	Rhizophora mangle	Rhizosphere	TSA	GGATAACTCCGGGAAACCGGGGCTAATACCGGATAACATTTTGAACTGCATGGTTCGAAATTGAAAGGCGGCTTCGGCTGTCACTTATGGATGGACCCGCGTCGCATTAGCTAGTTGGTGAGGTAACGGCTCACCAAGGCAACGATGCGTAGCCGACCTGAGAGGGTGATCGGCCACACTGGGACTGAGACACGGCCCAGACTCCTACGGGAGGCAGCAGTAGGGAATCTTCCGCAATGGACGAAAGTCTGACGGAGCAACGCCGCGTGAGTGATGAAGGCTTTCGGGTCGTAAAACTCTGTTGTTAGGGAAGAACAAGTGCTAGTTGAATAAGCTGGCACCTTGACGGTACCTAACCAGAAAGCCACGGCTAACTACGTGCCAGCAGCCGCGGTAATA…	PZ395055	99.3	1061	Bacillus toyonensis	k__Bacteria	p__Firmicutes	c__Bacilli	o__Bacillales	f__Bacillaceae	g__Bacillus	s__toyonensis	Not tested	Not tested	Not tested	Not tested	0	0	0	0
RM51	3°49'07.6"N 77°01'58.5"W; Campo hermoso mangrove, Buenaventura, Valle del Cauca, Colombia	Rhizophora mangle	Rhizosphere	TSA	TTAGCGGCGGACGGGTGAGTAACACGTGGGTAACCTGCCCATAAGACTGGGATAACTCCGGGAAACCGGGGCTAATACCGGATAACATTTTGAACCGCATGGTTCAAATTGAAAGGCGGCTTCGGCTGTCACTTATGGATGGACCCGCGTCGCATTAGCTAGTTGGTGAGGTAACGGCTCACCAAGGCAACGATGCGTAGCCGACCTGAGAGGGTGATCGGCCACACTGGGACTGAGACACGGCCCAGACTCCTACGGGAGGCAGCAGTAGGGAATCTTCCGCAATGGACGAAAGTCTGACGGAGCAACGCCGCGTGAGTGATGAAGGCTTTCGGGTCGTAAAACTCTGTTGTTAGGGAAGAACAAGTGCTAGTTGAATAAGCTGGCACCTTGACGGTA…	PZ395056	99.5	659	Bacillus anthracis	k__Bacteria	p__Firmicutes	c__Bacilli	o__Bacillales	f__Bacillaceae	g__Bacillus	s__anthracis	Not tested	Not tested	Not tested	Not tested	0	0	0	0
RM60	3°49'07.6"N 77°01'58.5"W; Campo hermoso mangrove, Buenaventura, Valle del Cauca, Colombia	Rhizophora mangle	Rhizosphere	TSA	TTAGCGGCGGACGGGTGAGTAACACGTGGGTAACCTGCCCATAAGACTGGGATAACTCCGGGAAACCGGGGCTAATACCGGATAACATTTTGAACCGCATGGTTCGAAATTGAAAGGCGGCTTCGGCTGTCACTTATGGATGGACCCGCGTCGCATTAGCTAGTTGGTGAGGTAACGGCTCACCAAGGCAACGATGCGTAGCCGACCTGAGAGGGTGATCGGCCACACTGGGACTGAGACACGGCCCAGACTCCTACGGGAGGCAGCAGTAGGGAATCTTCCGCAATGGACGAAAGTCTGACGGAGCAACGCCGCGTGAGTGATGAAGGCTTTCGGGTCGTAAAACTCTGTTGTTAGGGAAGAACAAGTGCTAGTTGAATAAGCTGGCACCTTGACGGT…	PZ395057	98.5	593	Bacillus anthracis	k__Bacteria	p__Firmicutes	c__Bacilli	o__Bacillales	f__Bacillaceae	g__Bacillus	s__anthracis	Not tested	Not tested	Not tested	Not tested	0	0	0	1
RM61	3°49'07.6"N 77°01'58.5"W; Campo hermoso mangrove, Buenaventura, Valle del Cauca, Colombia	Rhizophora mangle	Rhizosphere	TSA	GACGGGTGAGTAACACGTGGGTAACCTGCCCATCAGACTGGGATAACTCCGGGAAACCGGGGCTAATACCGGATAACATTTTGAACCGCATGGTTCGAAATTGAAAGGCGGCTTCGGCTGTCACTTATGGATGGACCCGCGTCGCATTAGCTAGTTGGTGAGGTAACGGCTCACCAAGGCAACGATGCGTAGCCGACCTGAGAGGGTGATCGGCCACACTGGGACTGAGACACGGCCCAGACTCCTACGGGAGGCAGCAGTAGGGAATCTTCCGCAATGGACGAAAGTCTGACGGAGCAACGCCGCGTGAGTGATGAAGGCTTTCGGGTCGTAAAACTCTGTTGTTAGGGAAGAACAAGTTCTAGTTGAATAAGCTGGCACCTTGACGGCTACCTAACC…	PZ395058	100	450	Bacillus cereus	k__Bacteria	p__Firmicutes	c__Bacilli	o__Bacillales	f__Bacillaceae	g__Bacillus	s__cereus	Not tested	Not tested	Not tested	Not tested	0	0	0	0
RM62	3°49'07.6"N 77°01'58.5"W; Campo hermoso mangrove, Buenaventura, Valle del Cauca, Colombia	Rhizophora mangle	Rhizosphere	TSA	GCGGCGGACGGGTGAGTAACACGTGGGTAACCTGCCCATAAGACTGGGATAACTCCGGGAAACCGGGGCTAATACCGGATAACATTTTGAACCGCATGGTTCGAAATTGAAAGGCGGCTTCGGCTGTCACTTATGGATGGACCCGCGTCGCATTAGCTAGTTGGTGAGGTAACGGCTCACCAAGGCAACGATGCGTAGCCGACCTGAGAGGGTGATCGGCCACACTGGGACTGAGACACGGCCCAGACTCCTACGGGAGGCAGCA	PZ395059	95.5	265	Bacillus thuringiensis	k__Bacteria	p__Firmicutes	c__Bacilli	o__Bacillales	f__Bacillaceae	g__Bacillus	s__thuringiensis	Not tested	Not tested	Not tested	Not tested	0	0	0	0
RM63	3°49'07.6"N 77°01'58.5"W; Campo hermoso mangrove, Buenaventura, Valle del Cauca, Colombia	Rhizophora mangle	Rhizosphere	TSA	TGCTCTTATGAAGTTATCGGCGGACGGGTGAGTAACACGTGGGTAACCTGCCCATAAGACTGGGATAACTCCGGGAAACCGGGGCTAATACCGGATAACATTTTGAACCGCGTGGTTCGAAATTGAAAGGCGGCTTCGGCTGTCACTTATGGATGGACCCGCGTCGCATTAGCTAGTTGGTGAGGTAACGGCTCACCAAGGCAACGATGCGTACCCGACCTGAGAGGGTGATCGGCCACACTGGGACTGAGACACGGCCCATACTCCTACGGGAGGCAGCAGTAGGGAATCTTCCGCAATGGAC	PZ395060	100	304	Bacillus thuringiensis	k__Bacteria	p__Firmicutes	c__Bacilli	o__Bacillales	f__Bacillaceae	g__Bacillus	s__thuringiensis	Not tested	Not tested	Not tested	Not tested	0	0	0	0
RM65	3°49'07.6"N 77°01'58.5"W; Campo hermoso mangrove, Buenaventura, Valle del Cauca, Colombia	Rhizophora mangle	Rhizosphere	TSA	ACACGTGGGTAACCTGCCCATAAGACTGGGATAACTCCGGGAAACCGGGGCTAATACCGGATAATATTTTGAACTGCATGGTTCAAAATTGAAAGGCGGCTTCGGCTGTCACTTATGGATGGACCCGCGTCGCATTAGCTAGTTGGTGAGGTAACGGCTCACCAAGGCAACGATGCGTAGCCGACCTGAGAGGGTGATCGGCCACACTGGGACTGAGACACGGCCCAGACTCCTACGGGAGGCAGCAGTAGGGAATCTTCCGCAATGGACGAAAGTCTGACGGAGCAACGCCGCGTGAGTGATGAAGGCTTTCGGGTCGTAAAACTCTGTTGTTAGGGAAGAACAAGTGCTAGTTGAATAAGCTGGCACCTTGACGGTACCTAACCAGAAAGCCACGGC…	PZ395061	100	431	Bacillus cereus	k__Bacteria	p__Firmicutes	c__Bacilli	o__Bacillales	f__Bacillaceae	g__Bacillus	s__cereus	Not tested	Not tested	Not tested	Not tested	0	0	2	2
RM67	3°49'07.6"N 77°01'58.5"W; Campo hermoso mangrove, Buenaventura, Valle del Cauca, Colombia	Rhizophora mangle	Root	TSA	GATTCACGATTACTAGCGATTCCGACTTCATGGAGTCGAGTTGCAGACTCCAATCCGGACTACGACGCACTTTTTGGGATTCGCTCACTTTCGCAAGTTGGCCGCCCTCTGTATGCGCCATTGTAGCACGTGTGTAGCCCTACTCGTAAGGGCCATGATGACTTGACGTCGTCCCCACCTTCCTCCGGTTTATCACCGGCAGTCTCCCTGGAGTTCCCGACATTACTCGCTGGCAAACAAGGATAAGGGTTGCGCTCGTTGCGGGACTTAACCCAACATTTCACAACACGAGCTGACGACAGCCATGCAGCACCTGTCTCAGAGTTCCCGAAGGCACCAAAGCATCTCTGCTAAGTTCTCTGGATGTCAAGAGTAGGTAAGGTTCTTCGCGTTGCATCG…	PZ395062	95.2	479	Vibrio fluvialis	k__Bacteria	p__Proteobacteria	c__Gammaproteobacteria	o__Vibrionales	f__Vibrionaceae	g__Vibrio	s__fluvialis	Not tested	Not tested	Not tested	Not tested	0	0	0	0
RM68	3°49'07.6"N 77°01'58.5"W; Campo hermoso mangrove, Buenaventura, Valle del Cauca, Colombia	Rhizophora mangle	Rhizosphere	TSA	TCTGATTCACGATTACTAGCGATTCCGACTTCATGGAGTCGAGTTGCAGACTCCAATCCGGACTACGACGCACTTTTTGGGATTCGCTCACTTTCGCAAGTTGGCCGCCCTCTGTATGCGCCATTGTAGCACGTGTGTAGCCCTACTCGTAAGGGCCATGATGACTTGACGTCGTCCCCACCTTCCTCCGGTTTATCACCGGCAGTCTCCCTGGAGTTCCCGACATTACTCGCTGGCAAACAAGGATAAGGGTTGCGCTCGTTGCGGGACTTAACCCAACATTTCACAACACGAGCTGACGACAGCCATGCAGCACCTGTCTCAGAGTTCCCGAAGGCACCAAAGCATCTCTGCTAAGTTCTCTGGATGTCAAGAGTAGGTAAGGTTCTTCGCGTTGCA…	PZ395063	97.3	664	Vibrio fluvialis	k__Bacteria	p__Proteobacteria	c__Gammaproteobacteria	o__Vibrionales	f__Vibrionaceae	g__Vibrio	s__fluvialis	Not tested	Not tested	Not tested	Not tested	0	0	0	0
RM69	3°49'07.6"N 77°01'58.5"W; Campo hermoso mangrove, Buenaventura, Valle del Cauca, Colombia	Rhizophora mangle	Stem	TSA													Not tested	Not tested	Not tested	Not tested	0	0	0	0
RM70	3°49'07.6"N 77°01'58.5"W; Campo hermoso mangrove, Buenaventura, Valle del Cauca, Colombia	Rhizophora mangle	Stem	TSA	TACTAGCGACTCCGACTTCACGGGGTCGAGTTGCAGACCCCGATCCGAACTGAGACCGGCTTTGAAAGGATTCGCTCCACCTCACGGCATCGCAGCCCTTTGTACCGGCCATTGTAGCATGTGTGAAGCCCTGGACATAAGGGGCATGATGACTTGACGTCATCCCCACCTTCCTCCGAGTTGACCCCGGCAGTCTCTCACGAGTCCCCACCATAACGTGCTGGCAACATGAGACAAGGGTTGCGCTCGTTGCGGGACTTAACCCAACATCTCACGACACGAGCTGACGACAGCCATGCACCACCTGCACACAGGCCACAAGGGAAACCACATCTCTGCAGTCGTCCTGTGCATGTCAAACCCAGGTAAGGTTCTTCGCGTTGCATCGAATTAATCCAC…	PZ395064	100	522	Mycobacterium fortuitum	k__Bacteria	p__Actinobacteria	c__Actinobacteria	o__Mycobacteriales	f__Mycobacteriaceae	g__Mycobacterium	s__fortuitum	Not tested	Not tested	Not tested	Not tested	0	0	0	0
RM71	3°49'07.6"N 77°01'58.5"W; Campo hermoso mangrove, Buenaventura, Valle del Cauca, Colombia	Rhizophora mangle	Stem	TSA	ACACGTGGGCAACCTGCCTGTAAGACTGGGATAACTCCGGGAAACCGGAGCTAATACCGGATAGTATCTTGAACCGCATGGTTCAAGCTGGAAAGACGGTTTCGGCTGTCACTTACAGATGGGCCCGCGGCGCATTAGCTAGTTGGTGAGGTAATGGCTCACCAAGGCAACGATGCGTAGCCGACCTGAGAGGGTGATCGGCCACACTGGGACTGAGACACGGCCCAGACTCCTACGGGA	PZ395065	100	240	Metabacillus idriensis	k__Bacteria	p__Firmicutes	c__Bacilli	o__Bacillales	f__Bacillaceae	g__Metabacillus	s__idriensis	Not tested	Not tested	Not tested	Not tested	0	0	1	0
RM72	3°49'07.6"N 77°01'58.5"W; Campo hermoso mangrove, Buenaventura, Valle del Cauca, Colombia	Rhizophora mangle	Stem	TSA	GCGGACGGGTGAGTAACACGTGGGTAACCTGCCTGTAAGACTGGGATAACTCCGGGAAACCGGGGCTAATACCGGATAACTCATTTCCTCGCATGAGGAAATGTTGAAAGGTGGCTTCTGCTACCACTTACCGATGGACCCCCGGCGCAATAACTAATTGGTGAAGTAACGGCTCCCCAAGGGAACCATGCCTAACCCAACTGAAAGGGTGATCGGCCACCCTGGGACTGAAACACGGCCCAAACTCCTACGGGAGGCAGCAATAAGGAATCTTCCGCAATGGACCAAAGTCTGACGGAACAACCCCCCGTGAGTGATGAAAGTTTTCCGATCCTAAAGCTCTGTTGTTAAGGAAAAACAAGTGCCGTTCCAATAAGGCGGCACCTTGACGGTACCTAA…	PZ395066	95.5	704	Rossellomorea vietnamensis	k__Bacteria	p__Firmicutes	c__Bacilli	o__Bacillales	f__Bacillaceae	g__Rossellomorea	s__vietnamensis	Not tested	Not tested	Not tested	Not tested	0	0	0	0
RM73	3°49'07.6"N 77°01'58.5"W; Campo hermoso mangrove, Buenaventura, Valle del Cauca, Colombia	Rhizophora mangle	Stem	TSA	GATTACTAGCGACTCCGACTTCACGGGGTCGAGTTGCAGACCCCGATCCGAACTGAGACCGGCTTTGAAAGGATTCGCTCCACCTCACGGCATCGCAGCCTTTTGTACCGGCCATTGTAGCATGTGTGAAGCCCTGGACATAAGGGGCATGATGACTTGACGTCATCCCCACCTTCCTCCGAGTTGACCC	PZ395067	100	190	Mycobacterium crocinum	k__Bacteria	p__Actinobacteria	c__Actinobacteria	o__Mycobacteriales	f__Mycobacteriaceae	g__Mycobacterium	s__crocinum	Not tested	Not tested	Not tested	Not tested	0	0	0	0
RM74	3°49'07.6"N 77°01'58.5"W; Campo hermoso mangrove, Buenaventura, Valle del Cauca, Colombia	Rhizophora mangle	Stem	TSA	CTAGCGACTCCGACTTCACGGGGTCGAGTTGCAGACCCCGATCCGAACTGAGACCGGCTTTGAAAGGATTCGCTCCACCTCACGGCATCGCAGCCCTTTGTACCGGCCATTGTAGCATGTGTGAAGCCCTGGACATAAGGGGCATGATGACTTGACGTCATCCCCACCTTCCTCCGAGTTGACCCCGGCAGTCTCTCACGAGTCCCCACCATAACGTGCTGGCAACATGAGACAAGGGTTGCGCTCGTTGCGGGACTTAACCCAACATCTCACGACACGAGCTGACGACAGCCATGCACCACCTGCACACAGGCCACAAGGGAACCGACATCTCTGCCGGCGTCCTGTGCATGTCAAACCCAGGTAAGGTTCTTCGCGTTGCATCGAATTAATCCACAT…	PZ395068	90.5	472	Mycobacterium smegmatis	k__Bacteria	p__Actinobacteria	c__Actinobacteria	o__Mycobacteriales	f__Mycobacteriaceae	g__Mycobacterium	s__smegmatis	Not tested	Not tested	Not tested	Not tested	0	0	0	0
RM75	3°49'07.6"N 77°01'58.5"W; Campo hermoso mangrove, Buenaventura, Valle del Cauca, Colombia	Rhizophora mangle	Stem	TSA	TACTAGCGACTCCGACTTCACGGGGTCGAGTTGCAGACCCCGATCCGAACTGAGACCGGCTTTTTGGGATTCGCTCCACCTCACGGTATCGCAGCCCATTGTACCGGCCATTGTAGCATGCGTGAAGCCCTGGACATAAGGGGCATGATGACTTGACGTCATCCCCACCTTCCTCCGAGTTGACCCCGGCAGTCTTCGATGAGTCCCCGCCATAACGCGCTGGCAACATCGAACGAGGGTTGCGCTCGTTGCGGGACTTAACCCAACATCTCACGACACGAGCTGACGACAGCCATGCACCACCTGTGACCGCCCCCGAAGGACCTGCCATCTCTGACAGTTTTGCGGCCATGTCAAACCCAGGTAAGGTTCTTCGCGTTGCATCGAATTAATCCGCAT…	PZ395069	92.2	443	Micromonospora aurantiaca	k__Bacteria	p__Actinobacteriota	c__Actinobacteria	o__Micromonosporales	f__Micromonosporaceae	g__Micromonospora	s__aurantiaca	Not tested	Not tested	Not tested	Not tested	0	0	0	0
RM76	3°49'07.6"N 77°01'58.5"W; Campo hermoso mangrove, Buenaventura, Valle del Cauca, Colombia	Rhizophora mangle	Root	TSA	GATTACTAGCGACTCCAACTTCATGAGGTCGAGTTGCAGACCTCAATCCGAACTGAGACCGGCTTTTTGGGATTCGCTCCACCTTACGGTATCGCAGCCCTTTGTACCGGCCATTGTAGCATGCGTGAAGCCCAAGACATAAGGGGCATGATGATTTGACGTCATCCCCACCTTCCTCCGAGTTGACCCCGGCAGTCTCCTATGAGTCCCCACCATTACGTGCTGGCAACATAGGACGAGGGTTGCGCTCGTTGCGGGACTTAACCCAACATCTCACGACACGAGCTGACGACAACCATGCACCACCTGTATACCCCGCTAAAAGCACTCCCTATCTCTAGGGATAGAAGGTATATGTCAAGCCTTGGTAAGGTTCTTCGCGTTGCATCGAATTAATCC…	PZ395070	96.3	481	Demequina salsinemoris	k__Bacteria	p__Actinobacteriota	c__Actinobacteria	o__Micrococcales	f__Demequinaceae	g__Demequina	s__salsinemoris	Not tested	Not tested	Not tested	Not tested	0	0	0	0
RM77	3°49'07.6"N 77°01'58.5"W; Campo hermoso mangrove, Buenaventura, Valle del Cauca, Colombia	Rhizophora mangle	Root	TSA	GACGGGTGAGTAACACGTGGGTAACCTGCCCATAAGACTGGGATAACATTCGGAAACGAATGCTAATACCGGATACGCGAATTGGTCGCATGGCCGAATCGGGAAAGGCGGAGCAATCTGCCACTTATGGATGGACCCGCGGCGCATTAGCTAGTTGGTGAGGTAACGGCTCACCAAGGCGACGATGCGTAGCCGACCTGAGAGGGTGATCGGCCACACTGGGACTGAGACACGGCCCAGACTCCTACGGGAGGCAGCAGTAGGGAATCTTCCGCAATGGACGAAAGTCTGACGGAGCAACGCCGCGTGAGTGATGAAGGTTTTCGGATCGTAAAGCTCTG	PZ395071	90.7	341	Paenibacillus lupini	k__Bacteria	p__Firmicutes	c__Bacilli	o__Paenibacillales	f__Paenibacillaceae	g__Paenibacillus	s__lupini	Not tested	Not tested	Not tested	Not tested	0	0	0	0
RM78	3°49'07.6"N 77°01'58.5"W; Campo hermoso mangrove, Buenaventura, Valle del Cauca, Colombia	Rhizophora mangle	Root														Not tested	Not tested	Not tested	Not tested	0	0	1	0
RM80	3°49'07.6"N 77°01'58.5"W; Campo hermoso mangrove, Buenaventura, Valle del Cauca, Colombia	Rhizophora mangle	Root	TSA	GCGATCCGGACTACGATCGGCTTTTTGAGATTAGCATCCTCTCGCGAGGTAGCCACCCTTTGTACCGACCATTGTAGCACGTG		100	83	Acinetobacter schindleri	k__Bacteria	p__Proteobacteria	c__Gammaproteobacteria	o__Pseudomonadales	f__Moraxellaceae	g__Acinetobacter	s__schindleri	Not tested	Not tested	Not tested	Not tested	0	0	0	0
RM81	3°49'07.6"N 77°01'58.5"W; Campo hermoso mangrove, Buenaventura, Valle del Cauca, Colombia	Rhizophora mangle	Root	TSA	GGTGAGTAACACGTGGGCAACCTGCCTATAAGACTGGGATAACTTCGGGAAACCGGAGCTAATACCGGATACGTTCTTTTCTCGCATGAGAGAAGATGGAAAGACGGTTTACGCTGTCACTTATAGATGGGCCCGCGGCGCATTAGCTAGTTGGTGAGGTAATGGCTCACCAAGGCGACGATGCGTAGCCGACCTGAGAGGGTGATCGGCCACACTGGGACTGAGACACGGCCCAGACTCCTACGGGAGGCAGCAGTAGGGAATCTTCCGCAATGGACGAAAGTCTGACGGAGCAACGCCGCGTGAACGAAGAAGGCCTTCGGGTCGTAAAGTTCTGTTGTTAGGGAAGAACAAGTAC	PZ395072	100	358	Peribacillus frigoritolerans	k__Bacteria	p__Firmicutes	c__Bacilli	o__Bacillales	f__Bacillaceae	g__Peribacillus	s__frigoritolerans	Not tested	Not tested	Not tested	Not tested	0	0	0	0
RM82	3°49'07.6"N 77°01'58.5"W; Campo hermoso mangrove, Buenaventura, Valle del Cauca, Colombia	Rhizophora mangle	Root	TSA	CGGCGGACGGGTGAGTAACACGTGGGCAACCTGCCTATAAGACTGGGATAACTTCGGGAAACCGGAGCTAATACCGGATACGTTCTTTTCTCGCATGAGAGAAGATGGAAAGACGGTTTACGCTGTCACTTATAGATGGGCCCGCGGCGCATTAGCTAGTTGGTGAGGTAATGGCTCACCAAGGCGACGATGCGTAGCCGACCTGAGAGGGTGATCGGCCACACTGGGACTGAGACACGGCCCAGACTCCTACGGGAGGCAGCAGTAGGGAATCTTCCGCAATGGACGAAAGTCTGACGGAGCAACGCCGCGTGAACGAAGAAGGCCTTCGGGTCGTAAAGTTCTGTTGTTAGGGAAGAACAAGTACCAGAGTAACTGCTGGTACCTTGACGGTACCTA…	PZ395073	99.7	1097	Peribacillus frigoritolerans	k__Bacteria	p__Firmicutes	c__Bacilli	o__Bacillales	f__Bacillaceae	g__Peribacillus	s__frigoritolerans	Not tested	Not tested	Not tested	Not tested	0	0	0	0
RM83	3°49'07.6"N 77°01'58.5"W; Campo hermoso mangrove, Buenaventura, Valle del Cauca, Colombia	Rhizophora mangle	Root	TSA	CCTGAGATTAGCGGCGGACGGGTGAGTAACACGTGGGCAACCTGCCTATAAGACTGGGATAACTTCGGGAAACCGGAGCTAATACCGGATACGTTCTTTTCTCGCATGAGAGAAGATGGAAAGACGGTTTACGCTGTCACTTATAGATGGGCCCGCGGCGCATTAGCTAGTTGGTGAGGTAATGGCTCACCAAGGCGACGATGCGTAGCCGACCTGAGAGGGTGATCGGCCACACTGGGACTGAGACACGGCCCAGACTCCTACGGGAGGCAGCAGTAGGGAATCTTCCGCAATGGACGAAAGTCTGACGGAGCAACGCCGCGTGAACGAAGAAGGCCTTCGGGTCGTAAAGTTCTGTTGTTAGGGAAGAACAAGTACCAGAGTAACTGCTGGTACCTT…	PZ395074	99.8	575	Peribacillus frigoritolerans	k__Bacteria	p__Firmicutes	c__Bacilli	o__Bacillales	f__Bacillaceae	g__Peribacillus	s__frigoritolerans	Not tested	Not tested	Not tested	Not tested	0	0	0	0
RM84	3°49'07.6"N 77°01'58.5"W; Campo hermoso mangrove, Buenaventura, Valle del Cauca, Colombia	Rhizophora mangle	Root	TSA	TGGGACTGAGACACGGCCCAGACTCCTACGGGAGGCAGCAGTGGGGAATATTGGACAATGGGCGCAAGCCTGATCCAGCCATGCCGCGTGTGTGAAGAAGGCCTTTTGGTTGTAAAGCACTTTAAGCGAGGAGGAGGCTCCTTTAGTTAATACCTAAAGAGAGTGGACGTTACTCGCAGAATAAGCACCGGCTAACTCTGTGCCAGCAGCCGCGGTAATACAGAGGGTGCGAGCGTTAATCGGATTTACTGGGCGTAAAGCGTGCGTAGGCGGCTTTTTAAGTCGG	PZ395075	100	286	Acinetobacter schindleri	k__Bacteria	p__Proteobacteria	c__Gammaproteobacteria	o__Pseudomonadales	f__Moraxellaceae	g__Acinetobacter	s__schindleri	Not tested	Not tested	Not tested	Not tested	0	0	0	0
RM85	3°49'07.6"N 77°01'58.5"W; Campo hermoso mangrove, Buenaventura, Valle del Cauca, Colombia	Rhizophora mangle	Root	TSA	TAGCGGCGGACGGGTGAGTAACACGTGGGCAACCTGCCTATAAGACTGGGATAACTTCGGGAAACCGGAGCTAATACCGGATACGTTCTTTTCTCGCATGAGAGAAGATGGAAAGACGGTTTACGCTGTCACTTATAGATGGGCCCGCGGCGCATTAGCTAGTTGGTGAGGTAATGGCTCACCAAGGCGACGATGCGTAGCCGACCTGAGAGGGTGATCGGCCACACTGGGACTGAGACACGGCCCAGACTCCTACGGGAGGCAGCAGTAGGGAATCTTCCGCAATGGACGAAAGTCTGACGGAGCAACGCCGCGTGAACGAAGAAGGCCTTCGGGTCGTAAAGTTCTGTTGTTAGGGAAGAACAAGTACCAGAGTAACTGCTGGTACCTTGACGGTAC…	PZ395076	100	1036	Peribacillus frigoritolerans	k__Bacteria	p__Firmicutes	c__Bacilli	o__Bacillales	f__Bacillaceae	g__Peribacillus	s__frigoritolerans	Not tested	Not tested	Not tested	Not tested	0	0	0	0
RM86	3°49'07.6"N 77°01'58.5"W; Campo hermoso mangrove, Buenaventura, Valle del Cauca, Colombia	Rhizophora mangle	Rhizosphere	TSA	TAACACGTGAGTAACCTGCCCTTAACTCTGGGATAAGCCTGGGAAACTGGGTCTAATACCGGATAGGAGCGTCCACCGCATGGTGGGTGTTGGAAAGATTTATCGGTTTTGGATGGACTCGCGGCCTATCAGCTTGTTGGTGAGGTAATGGCTCACCAAGGCGACGACGGGTAGCCGGCCTGAGAGGGTGACCGGCCACACTGGGACTGAGACACGGCCCAGACTCCTACGGGAGGCAGCAGTGGGGAATATTGCACAATGGGCGCAAGCCTGATGCAGCGACGCCGCGTGAGGGATGACGGCCTTCGGGTTGTAAACCTCTTTCAGTAGGGAAGAAGCGAAAGTGACGGTACCTGCAGAAGAAGCACCGGCTAACTACGTGCCAGCAGCCGCGGTAAT…	PZ395077	98.6	1161	Micrococcus luteus	k__Bacteria	p__Actinobacteriota	c__Actinobacteria	o__Micrococcales	f__Micrococcaceae	g__Micrococcus	s__luteus	Not tested	Not tested	Not tested	Not tested	0	0	0	0
RM87	3°49'07.6"N 77°01'58.5"W; Campo hermoso mangrove, Buenaventura, Valle del Cauca, Colombia	Rhizophora mangle	Rhizosphere	TSA	CCTGATATCAGCGGCGGACGGGTGAGTAACACGTGGGTAACCTGCCTGTAAGACTGGGATAACTCCGGGAAACCGGGGCTAATACCGGATAACTCATTTCCTCGCATGAGGAAATGTTGAAAGGTGGCTTCGGCTATCACTTACAGATGGACCCGCGGCGCATTAACTAGTTGGGGAGGTAACGGCTCACCAAGGCAACCATGCGTAACCCAACTGAAAGGGTGAACGGCCCCCCTGGGACTGAAACACGGCCCAAACTCCTACGGGAGGCAGCAGT	PZ395078	94.6	277	Rossellomorea vietnamensis	k__Bacteria	p__Firmicutes	c__Bacilli	o__Bacillales	f__Bacillaceae	g__Rossellomorea	s__vietnamensis	Not tested	Not tested	Not tested	Not tested	0	0	0	0
RM89	3°49'07.6"N 77°01'58.5"W; Campo hermoso mangrove, Buenaventura, Valle del Cauca, Colombia	Rhizophora mangle	Root	TSA	TGCTGATCCGCGATTACTAGCAATTCCGACTTCATGCAGGCGAGTTGCAGCCTGCAATCCGAACTGAGACCGGCTTTGCTGGGATTGGCTCCACCTCGCGGCTTCGCTTCCCGTTGTACCGGCCATTGTAGTACGTGTGTAG		93	142	Paenibacillus riograndensis	k__Bacteria	p__Firmicutes	c__Bacilli	o__Paenibacillales	f__Paenibacillaceae	g__Paenibacillus	s__riograndensis	Not tested	Not tested	Not tested	Not tested	0	0	0	0
RM90	3°49'07.6"N 77°01'58.5"W; Campo hermoso mangrove, Buenaventura, Valle del Cauca, Colombia	Rhizophora mangle	Rhizosphere	TSA	TAGCGGCGGACGGGTGAGTAACACGTGGGCAACCTGCCTGTAAGACTGGGATAACTCCGGGAAACCGGGGCTAATACCGGATAATATCTATTTATACATATAATTAGATTGAAAGATGGTTCTGCTATCACTTACAGATGGGCCCGCGGCGCATTAGCTAGTTGGTGAGGTAACGGCTCACCAAGGCGACGATGCGTAGCCGACCTGAGAGGGTGATCGGCCACACTGGGACTGAGACACGGCCCAGACTCCTACGGGAGGCAGCAGTAGGGAATCTTCCGCAATGGACGAAAGTCTGACGGAGCAACGCCGCGTGAGTGATGAAGGTTTTCGGATCGTAAAACTCTGTTGTTAGGGAAGAACAAGTACCGGAGTAACTGCCGGTACCTTGACGGTACC…	PZ395079	96.9	873	Bacillus kochii	k__Bacteria	p__Firmicutes	c__Bacilli	o__Bacillales	f__Bacillaceae	g__Bacillus	s__kochii	Not tested	Not tested	Not tested	Not tested	0	0	0	0
RM91	3°49'07.6"N 77°01'58.5"W; Campo hermoso mangrove, Buenaventura, Valle del Cauca, Colombia	Rhizophora mangle	Rhizosphere	TSA	TTAGCGGCGGACGGGTGAGTAACACGTGGATAACCTACCTATAAGACTGGGATAACTTCGGGAAACCGGAGCTAATACCGGATAATATATTGAACCGCATGGTTCAATAGTGAAAGACGGTTTTGCTGTCACTTATAGATGGATCCGCGCCGCATTAGCTAGTTGGTAAGGTAACGGCTTACCAAGGCAACGATGCGTAGCCGACCTGAGAGGGTGATCGGCCACACTGGAACTGAGACACGGTCCAGACTCCTACGGGAGGCAGCAGTAGGGAATCTTCCGCAATGGGCGAAAGCCTGACGGAGCAACGCCGCGTGAGTGATGAAGGTCTTCGGATCGTAAAACTCTGTTATTAGGGAAGAACAAATGTGTAAGTAACTATGCACGTCTTGACGGTAC…	PZ395080	99.6	1125	Staphylococcus epidermidis	k__Bacteria	p__Firmicutes	c__Bacilli	o__Staphylococcales	f__Staphylococcaceae	g__Staphylococcus	s__epidermidis	Not tested	Not tested	Not tested	Not tested	0	0	0	0
RM92	3°49'07.6"N 77°01'58.5"W; Campo hermoso mangrove, Buenaventura, Valle del Cauca, Colombia	Rhizophora mangle	Rhizosphere	TSA	TGGATTAGTGGCGAACGGGTGAGTAACACGTGAGTAACCTGCCCTTAACTCTGGGATAAGCCTGGGAAACTGGGTCTAATACCGGATAGGAGCGTCCACCGCATGGTGGGTGTTGGAAAGATTTATCGGTTTTGGATGGACTCGCGGCCTATCAGCTTGTTGGTGAGGTAATGGCTCACCAAGGCGACGACGGGTAGCCGGCCTGAGAGGGTGACCGGCCACACTGGGACTGAGACACGGCCCAGACTCCTACGGGAGGCAGCAGTGGGGAATATTGCACAATGGGCGCAAGCCTGATGCAGCGACGCCGCGTGAGGGATGACGGCCTTCGGGTTGTAAACCTCTTTCAGTAGGGAAGAAGCGAAAGTGACGGTACCTGCAGAAGAAGCACCGGCTAAC…	PZ395081	97.6	1136	Micrococcus luteus	k__Bacteria	p__Actinobacteriota	c__Actinobacteria	o__Micrococcales	f__Micrococcaceae	g__Micrococcus	s__luteus	Not tested	Not tested	Not tested	Not tested	0	0	0	0
RM93	3°49'07.6"N 77°01'58.5"W; Campo hermoso mangrove, Buenaventura, Valle del Cauca, Colombia	Rhizophora mangle	Root	TSA	CGATTCCGCCTTCATGCTCTCGAGTTGCAGAGAACAATCCGAACTGAGACGACTTTTGGAGATTAGCTCACCCTCGCGGGATTGCAGCCCACTGTAGTCGCCATTGTAGCACGTGTGTAGCCCAGCGCGTAAGGGCCATGAGGACTTGACGTCATCCCCACCTTCCTCCGGCTTATCACCGGCGGTTCCTTTAGAGTACCCAACTAAATGATGGTAACTAAAGGCGAGGGTTGCGCTCGTTGCGGGACTTAACCCAACATCTCACGACACGAGCTGACGACAGCCATGCAGCACCTGTGTTCCAGTCCCCGAAGGGAAGAGATCCATCTCTGGAAATCGTCCGGACATGTCAAACGCTGGTAAGGTTCTGCGCGTTGCTTCGAATTAAACCACATGCTC…	PZ395082	97.9	822	Sphingomonas endophytica	k__Bacteria	p__Proteobacteria	c__Alphaproteobacteria	o__Sphingomonadales	f__Sphingomonadaceae	g__Sphingomonas	s__endophytica	Not tested	Not tested	Not tested	Not tested	0	0	0	0
RM94	3°49'07.6"N 77°01'58.5"W; Campo hermoso mangrove, Buenaventura, Valle del Cauca, Colombia	Rhizophora mangle	Rhizosphere	TSA	TGATCCGCGATTACTAGCGATTCCACCTTCATGCACCCGAGTTGCAGAGTGCAATCCGAACTGAGACGGCTTTTCGGGATCGGCTCGGCCTCGCGACCTGGCTTCCCTCTGTCACCGCCATTGTAGCACGTGTGTAGCCCAGCCCATAAGGGCCATGAGGACTTGACGTCATCCCCACCTTCCTCCGGCTTGTCACCGGCAGTTCCTCTAGAGTGCCCACCCGAACATGCTGGCAACTAGAGGCGAGGGTTGCGCTCGTTGCGGGACTTAACCCAACATCTCACGACACGAGCTGACGACAGCCATGCAGCACCTGTGCATCACGCCTATTGCTAGGAAAGTCCATCTCTGGACCGGTCGTGACCATGTCAAGGGCTGGTAAGGTTCTGCGCGTTGCTT…	PZ395083	99.9	846	Roseomonas mucosa	k__Bacteria	p__Proteobacteria	c__Alphaproteobacteria	o__Acetobacterales	f__Acetobacteraceae	g__Roseomonas	s__mucosa	Not tested	Not tested	Not tested	Not tested	0	0	0	0
RM95	3°49'07.6"N 77°01'58.5"W; Campo hermoso mangrove, Buenaventura, Valle del Cauca, Colombia	Rhizophora mangle	Rhizosphere	TSA	GATCTGCGATTACTAGCGACTCCGACTTCATGAGGTCGAGTTGCAGACCTCAATCCGAACTGAGACCGGCTTTTTGGGATTCGCTCCACCTTACGGTATCGCAGCCCTTTGTACCGGCCATTGTAGCATGCGTGAAGCCCAAGACATAAGGGGCATGATGATTTGACGTCATCCCCACCTTCCTCCGAGTTGACCCCGGCAGTCTCCTATGAGTCCCCACCATCACGTGCTGGCAACATAGGACGAGGGTTGCGCTCGTTGCGGGACTTAACCCAACATCTCACGACACGAGCTGACGACAACCATGCACCACCTGT	PZ395084	100	317	Demequina silvatica	k__Bacteria	p__Actinobacteriota	c__Actinobacteria	o__Micrococcales	f__Demequinaceae	g__Demequina	s__silvatica	Not tested	Not tested	Not tested	Not tested	0	0	0	0
RM96	3°49'07.6"N 77°01'58.5"W; Campo hermoso mangrove, Buenaventura, Valle del Cauca, Colombia	Rhizophora mangle	Rhizosphere	TSA	CCGAAAGGAATGCTAATACCGCATACGCCCTACGGGGGAAAGCAGGGGATCTTCGGACCTTGCGCTAATAGATGAGCCTAAGTCGGATTAGCTAGTTGGTGGGGTAAAGGCCTACCAAGGCGACGATCTGTAGCGGGTCTGAGAGGATGATCCGCCACACTGGGACTGAGACACGGCCCAGACTCCTACGGGAGGCAGCAGTGGGGAATATTGGACAATGGGCGCAAGCCTGATCCAGCCATGCCGCGTGTGTGAAGAAGGCCTTTTGGTTGTAAAGCACTTTAAGCGAGGAGGAGGCTCCTTTAGTTAATACCTAAAGAGAGTGGACGTTACTCGCAGAATAAGCACCGGCTAACTCTGTGCCAGCAGCCGCGGTAATACAGAGGGTGCGAGCGTTAA…	PZ395085	98.2	1041	Acinetobacter schindleri	k__Bacteria	p__Proteobacteria	c__Gammaproteobacteria	o__Pseudomonadales	f__Moraxellaceae	g__Acinetobacter	s__schindleri	Not tested	Not tested	Not tested	Not tested	0	0	0	0
RM97	3°49'07.6"N 77°01'58.5"W; Campo hermoso mangrove, Buenaventura, Valle del Cauca, Colombia	Rhizophora mangle	Rhizosphere	TSA	GATTCCGCCTTCACGCTCTCGAGTTGCAGAGAACGATCCGAACTGAGACGACTTTTGGAGATTAGCTCCCTCTCGCGAGGTGGCTGCCCACTGTAGTCGCCATTGTAGCACGTGTGTAGCCCAACGCGTAAGGGCCATGAGGACTTGACGTCATCCCCACCTTCCTCCGGCTTATCACCGGCGGTTCCTTTAGAGTACCCAACTAAATGCTGGCAACTAAAGGCGAGGGTTGCGCTCGTTGCGGGACTTAACCCAACATCTCACGACACGAGCTGACGACAGCCATGCAGCACCTGTCACCTATCCAGCCGAACTGAAGGAAAGTGTCTCCACGATCCGCGATAGGGATGTCAAA	PZ395086	93.3	355	Sphingobium yanoikuyae	k__Bacteria	p__Proteobacteria	c__Alphaproteobacteria	o__Sphingomonadales	f__Sphingomonadaceae	g__Sphingobium	s__yanoikuyae	Not tested	Not tested	Not tested	Not tested	0	0	0	0
RM98	3°49'07.6"N 77°01'58.5"W; Campo hermoso mangrove, Buenaventura, Valle del Cauca, Colombia	Rhizophora mangle	Rhizosphere	TSA	CGCGATTACTAGCGATTCCGCCTTCACGCTCTCGAGTTGCAGAGAACGATCCGAACTGAGACGACTTTTGGAGATTAGCTCCCTCTCGCGAGGTGGCTGCCCACTGTAGTCGCCATTGTAGCACGTGTGTAGCCCAACGCGTAAGGGCCATGAGGACTTGACGTCATCCCCACCTTCCTCCGGCTTATCACCGGCGGTTCCTTTAGAGTACCCAACTAAATGCTGGCAACTAAAGGCGAGGGTTGCGCTCGTTGCGGGACTTAACCCAACATCTCACGACACGAGCTGACGACAGCCATGCAGCACCTGTCACCTATCCAGCCGAACTGAAGGAAAGTGTCTCCACGATCCGCGATAGGGATGTCAAACGTTGGTAAGGTTCTGCGCGTTGCTTCGAAT…	PZ395087	95.7	557	Sphingobium yanoikuyae	k__Bacteria	p__Proteobacteria	c__Alphaproteobacteria	o__Sphingomonadales	f__Sphingomonadaceae	g__Sphingobium	s__yanoikuyae	Not tested	Not tested	Not tested	Not tested	0	0	0	0
RM99	3°49'07.6"N 77°01'58.5"W; Campo hermoso mangrove, Buenaventura, Valle del Cauca, Colombia	Rhizophora mangle	Rhizosphere	TSA	AGTAATACTTAGGAATCTGGCTATTAGTGGGGGACAACATTTCGAAAGGGATGCTAATACCGCATACGTCCTACGGGAGAAAGCAGGGGATCTTCGGACCTTGCGCTAATAGATGAGCCTAAGTCGGATTAGCTAGTTGGTGGGGTAAAGGCCTACCAAGGCGACGATCTGTAGCGGGTCTGAGAGGATGATCCGCCACACTGGGACTGAGACACGGCCCAGACTCCTACGGGAGGCAGCAGTGGGGAATATTGGACAATGGGGGGAACCCTGATCCAGCCATGCCGCGTGTGTGAAGAAGGCCTTATGGTTGTAAAGCACTTTAAGCGAGGAGGAGGGTACTGGTATTAATACTACCAGCTACTGGACGTTACTCGCAGAATAAGCACCGGCTAACTC…	PZ395088	96.3	1012	Acinetobacter septicus	k__Bacteria	p__Proteobacteria	c__Gammaproteobacteria	o__Pseudomonadales	f__Moraxellaceae	g__Acinetobacter	s__septicus	Not tested	Not tested	Not tested	Not tested	0	0	0	0
RM101	3°49'07.6"N 77°01'58.5"W; Campo hermoso mangrove, Buenaventura, Valle del Cauca, Colombia	Rhizophora mangle	Rhizosphere	TSA	GATGGAAAGACGGTTTCGGCTGTCACTTATAGATGGGCCCGCGGCGCATTAGCTAGTTGGTGAGGTAATGGCTCACCAAGGCGACGATGCGTAGCCGACCTGAGAGGGTGATCGGCCACACTGGGACTGAGACACGGCCCAGACTCCTACGGGAGGCAGCAGTAGGGAATCTTCCGCAATGGACGAAAGTCTGACGGAGCAACGCCGCGTGAACGAAGAAGGCCTTCGGGTCGTAAAGTTCTGTTGTTAGGGAAGAACAAGTACCAGAGTAACTGCTGGTACCTTGACGGTACCTAACCAGAAAGCCACGGCTAACTACGTGC	PZ395089	100	323	Peribacillus butanolivorans	k__Bacteria	p__Firmicutes	c__Bacilli	o__Bacillales	f__Bacillaceae	g__Peribacillus	s__butanolivorans	Not tested	Not tested	Not tested	Not tested	0	0	0	0
RM103	3°49'07.6"N 77°01'58.5"W; Campo hermoso mangrove, Buenaventura, Valle del Cauca, Colombia	Rhizophora mangle	Rhizosphere	TSA	CGATTCCAACTTCACGTAGTCGAGTTGCAGACTACGATCCGGACTACGATACACTTTCTGGGATTAGCTCCCCCTCGCGGGTTGGCGGCCCTCTGTATGTACCATTGTATGACGTGTGAAGCCCTACCCATAAGGGCCATGAGGACTTGACGTCATCCCCACCTTCCTCCGGTTTGTCACCGGCAGTCTCATTAGAGTGCTCAACTGAATGTAGCAACTAATGACAAGGGTTGCGCTCGTTGCGGGACTTAACCCAACATCTCACGACACGAGCTGACGACAGCCATGCAGCACCTGTGTTACGGTTCTCTTTCGAGCACTGCCAAATCTCTTCGGCATTCCGTACA	PZ395090	98	347	Massilia oculi	k__Bacteria	p__Proteobacteria	c__Gammaproteobacteria	o__Burkholderiales	f__Oxalobacteraceae	g__Massilia	s__oculi	Not tested	Not tested	Not tested	Not tested	0	0	0	0
RM104	3°49'07.6"N 77°01'58.5"W; Campo hermoso mangrove, Buenaventura, Valle del Cauca, Colombia	Rhizophora mangle	Root	TSA	GATCCGAACTGAGACCGGCTTTGAAAGGATTCGCTCCACCTCACGGCATCGCAGCCCTTTGTACCGGCCATTGTAGCATGTGTGAAGCCCTGGACATAAGGGGCATGATGACTTGACGTCATCCCCACCTTCCTCCGAGTTGACCCCGGCAGTCTCTCACGAGTCCCCACCATAACGTGCTGGCAACATGAGACAAGGGTTGCGCTCGTTGCGGGACTTAACCCAACATCTCACGACACGAGCTGACGACAGCCATGCACCACCTGCACACAGGCCACAAGGGAACCGACATCTCTGCCGGCGTCCTGTGCATGTCAAACCCAGGTAAGGTTCTTCGCGTTGCATCGAATTAATCCACATGCTCCGCCGCTTGTGCGGGCCCCCGTCAATTCCTTTGAG…	PZ395091	98.6	835	Mycobacterium pallens	k__Bacteria	p__Actinobacteria	c__Actinobacteria	o__Mycobacteriales	f__Mycobacteriaceae	g__Mycobacterium	s__pallens	Not tested	Not tested	Not tested	Not tested	0	0	0	0
RM105	3°49'07.6"N 77°01'58.5"W; Campo hermoso mangrove, Buenaventura, Valle del Cauca, Colombia	Rhizophora mangle	Rhizosphere	TSA	TTGCTGATCTGCGATTACTAGCGACTCCGACTTCACGGGGTCGAGTTGCAGACCCCGATCCGAACTGAGACCGGCTTTGAG		100	81	Mycolicibacterium poriferae	k__Bacteria	p__Actinobacteriota	c__Actinobacteria	o__ Mycobacteriales	f__ Mycobacteriaceae	g__ Mycolicibacterium	s__poriferae	Not tested	Not tested	Not tested	Not tested	0	0	0	0
RM106	3°49'07.6"N 77°01'58.5"W; Campo hermoso mangrove, Buenaventura, Valle del Cauca, Colombia	Rhizophora mangle	Rhizosphere														Not tested	Not tested	Not tested	Not tested	0	0	0	0
RM107	3°49'07.6"N 77°01'58.5"W; Campo hermoso mangrove, Buenaventura, Valle del Cauca, Colombia	Rhizophora mangle	Stem	TSA	GGAATACATCGGAATCTACCTTTTCGTGGGGGATAACGTAGGGAAACTTACGCTAATACCGCATACGACCTTCGGGTGAAAGCAGGGGACCTTCGGGCCTTGCGCGGATAGATGAGCCGCCATGTTCGGATTAGCTAGTTGGCGGGGTAAAGGCCCACCAAGGCGACGATCCGTAGCTGGTCTGAGAGGATGATCAGCCACACTGGAACTGAGACACGGTCCAGACTCCTACGGGAGGCAGCAGTGGGGAATATTGGACAATGGGCGCAAGCCTGATCCAGCCATACCGCGTGGGTGAAGAAGGCCTTCGGGTTGTAAAGCCCTTTTGTTGGGAAAGAAAAGCAATCGGCTAATACCCGGTTGTTCTGACGGTACCCAAAGAATAAGCACCGGCTAACT…	PZ395092	96.8	1040	Stenotrophomonas maltophilia	k__Bacteria	p__Proteobacteria	c__Gammaproteobacteria	o__Xanthomonadales	f__Xanthomonadaceae	g__Stenotrophomonas	s__maltophilia	Not tested	Not tested	Not tested	Not tested	0	0	0	0
RM111	3°49'07.6"N 77°01'58.5"W; Campo hermoso mangrove, Buenaventura, Valle del Cauca, Colombia	Rhizophora mangle	Stem	TSA	GGTGGCGAGTGGCGGACGGGTGAGGAATACATCGGAATCTACCTTTTCGTGGGGGATAACGTAGGGAAACTTACGCTAATACCGCATACGACCTTCGGGTGAAAGCAGGGGACCTTCGGGCCTTGCGCGGATAGATGAGCCGATGTCGGATTAGCTAGTTGGCGGGGTAAAGGCCCACCAAGGCGACGATCCGTAGCTGGTCTGAGAGGATGATCAGCCACACTGGAACTGAGACACGGTCCAGACTCCTACGGGAGGCAGCAGTGGGGAATATTGGACAATGGGCGCAAGCCTGATCCAGCCATACCGCGTGGGTGAAGAAGGCCTTCGGGTTGTAAAGCCCTTTTGTTGGGAAAGAAAAGCAGTCGGCTAATACCCGGTTGTTCTGACGGTACCCAA…	PZ395093	95.8	1033	Stenotrophomonas rhizophila	k__Bacteria	p__Proteobacteria	c__Gammaproteobacteria	o__Xanthomonadales	f__Xanthomonadaceae	g__Stenotrophomonas	s__rhizophila	Not tested	Not tested	Not tested	Not tested	0	0	0	0
RM112	3°49'07.6"N 77°01'58.5"W; Campo hermoso mangrove, Buenaventura, Valle del Cauca, Colombia	Rhizophora mangle	Stem	TSA	GCTCGAAGATGGTGAGAGTGGCGCACGGGTGCGTAACGCGTGAGCAACCTACCTCTATCAGGGGGATAGCCTCTCGAAAGAGAGATTAACACCGCATAACATCAACAGTTCGCATGTTCGGTTGATTAAATATTTATAGGATAGAGATGGGCTCGCGTGACATTAGCTAGTTGGTAGGGTAACGGCTTACCAAGGCGACGATGTCTAGGGGCTCTGAGAGGAGAATCCCCCACACTGGTACTGAGACACGGACCAGACTCCTACGGGAGGCAGCAGTAAGGAATATTGGTCAATGGGCGGAAGCCTGAACCAGCCATGCCGCGTGCAGGATGACTGCCCTATGGGTTGTAAACTGCTTTTGTCCAGGAATAAACCTAAATACGTGTATTTAGCTGAATG…	PZ395094	98.4	1132	Sphingobacterium multivorum	k__Bacteria	p__Bacteroidetes	c__Sphingobacteriia	o__Sphingobacteriales	f__Sphingobacteriaceae	g__Sphingobacterium	s__multivorum	Not tested	Not tested	Not tested	Not tested	0	0	0	0
RM113	3°49'07.6"N 77°01'58.5"W; Campo hermoso mangrove, Buenaventura, Valle del Cauca, Colombia	Rhizophora mangle	Stem	TSA	CGGGTGCGTAACGCGTGGGAATCTGCCCTTGGGTTCGGAATAACTTCTGGAAACGGAAGCTAATACCGGATGATGACGTAAGTCCAAAGATTTATCGCCCAAGGATGAGCCCGCGTAGGATTAGCTAGTTGGTGGGGTAAAGGCCCACCAAGGCGACGATCCTTAGCTGGTCTGAGAGGATGATCAGCCACACTGGGACTGAGACACGGCCCAGACTCCTACGGGAGGCAGCAGTAGGGAATATTGGACAATGGGCGAAAGCCTGATCCAGCAATGCCGCGTGAGTGATGAAGGCCTTAGGGTTGTAAAGCTCTTTTACCCGGGATGATAATGACAGTACCGGGAGAATAAGCTCCGGCTAACTCCGTGCCAGCAGCCGCGGTAATACGGAGGGAGCTA…	PZ395095	99.8	1210	Sphingobium yanoikuyae	k__Bacteria	p__Proteobacteria	c__Alphaproteobacteria	o__Sphingomonadales	f__Sphingomonadaceae	g__Sphingobium	s__yanoikuyae	Not tested	Not tested	Not tested	Not tested	0	0	0	0
RM114	3°49'07.6"N 77°01'58.5"W; Campo hermoso mangrove, Buenaventura, Valle del Cauca, Colombia	Rhizophora mangle	Stem	TSA	CCTAGCGGCGGACGGGTGAGTAATGCTTAGGAATCTGCCTATTAGTGGGGGACAACATTCCGAAAGGAATGCTAATACCGCATACGTCCTACGGGGGAAAGCAGGGGATCTTCGGACCTTGCGCTAATAGATGAGCCTAAGTCGGATTAGCTAGTTGGTGGGGTAAAGGCCTACCAAGGCGACGATCTGTAGCGGGTCTGAGAGGATGATCCGCCACACTGGGACTGAGACACGGCCCAGACTCCTACGGGAGGCAGCAGTGGGGAATATTGGACAATGGGCGCAAGCCTGATCCAGCCATGCCGCGTGTGTGAAGAAGGCCTTTTGGTTGTAAAGCACTTTAAGCGAGGAGGAGGCTCCTTTAGTTAATACCTAAAGAGAGTGGACGTTACTCGCAGA…	PZ395096	95.9	791	Acinetobacter schindleri	k__Bacteria	p__Proteobacteria	c__Gammaproteobacteria	o__Pseudomonadales	f__Moraxellaceae	g__Acinetobacter	s__schindleri	Not tested	Not tested	Not tested	Not tested	0	0	0	0
RM115	3°49'07.6"N 77°01'58.5"W; Campo hermoso mangrove, Buenaventura, Valle del Cauca, Colombia	Rhizophora mangle	Stem	TSA	GGCAGACGGGTGAGTAACGCGTGGGAACATACCCTTTCCTGCGGAATAGCTCCGGGAAACTGGAATTAATACCGCATACGCCCTACGGGGGAAAGATTTATCGGGGAAGGATTGGCCCGCGTTGGATTAGCTAGTTGGTGGGGTAAAGGCCTACCAAGGCGACGATCCATAGCTGGTCTGAGAGGATGATCAGCCACATTGGGACTGAGACACGGCCCAAACTCCTACGGGAGGCAGCAGTGGGGAATATTGGACAATGGGCGCAAGCCTGATCCAGCCATGCCGCGTGAGTGATGAAGGCCTTAGGGTTGTAAAGCTCTTTCACCGATGAAGATAATGACGGTAGTCGGAGAAGAAGCCCCGGCTAACTTCGTGCCAGCAGCCGCGGTAATACGAAGG…	PZ395097	97.5	473	Agrobacterium salinitolerans	k__Bacteria	p__Proteobacteria	c__Alphaproteobacteria	o__Rhizobiales	f__Rhizobiaceae	g__Agrobacterium	s__salinitolerans	Not tested	Not tested	Not tested	Not tested	0	0	0	0
RM116	3°49'07.6"N 77°01'58.5"W; Campo hermoso mangrove, Buenaventura, Valle del Cauca, Colombia	Rhizophora mangle	Stem	TSA	GAACGGGTGAGTAATATATCGGAACGTACCCAGAAGTGGGGGATAACGTAGCGAAAGTTACGCTAATACCGCATACGATCCACGGATGAAAGTAGGGGACCTTCGGGCCTTATGCTTTTGGAGCGGCCGATATCTGATTAGCTAGTTGGTGAGGTAAAGGCTCACCAAGGCGACGATCAGTAGCTGGTCTGAGAGGACGACCAGCCACACTGGAACTGAGACACGGTCCAGACTCCTACGGGAGGCAGCAGTGGGGAATTTTGGACAATGGGCGCAAGCCTGATCCAGCAATGCCGCGTGAGTGAAGAAGGCCTTCGGGTTGTAAAGCTCTTTTGTCAGGGAAGAAACGGTAGAGGCTAATATCCTTTGCTAATGACGGTACCTGAAGAATAAGCACCG…	PZ395098	96	1143	Massilia oculi	k__Bacteria	p__Proteobacteria	c__Gammaproteobacteria	o__Burkholderiales	f__Oxalobacteraceae	g__Massilia	s__oculi	Not tested	Not tested	Not tested	Not tested	0	0	0	0
RM117	3°49'07.6"N 77°01'58.5"W; Campo hermoso mangrove, Buenaventura, Valle del Cauca, Colombia	Rhizophora mangle	Stem	TSA	CGCACGGGTGCGTAACGCGTGGGAATCTGCCCTTGGGTTCGGAATAACTTCTGGAAACGGAAGCTAATACCGGATGATGACGTAAGTCCAAAGATTTATCGCCCAAGGATGAGCCCGCGTAGGATTAGCTAGTTGGTGGGGTAAAGGCCCACCAAGGCGACGATCCTTAGCTGGTCTGAGAGGATGATCAGCCACACTGGGACTGAGACACGGCCCAGACTCCTACGGGAGGCAGCAGTAGGGAATATTGGACAATGGGCGAAAGCCTGATCCAGCAATGCCGCGTGAGTGATGAAGGCCTTAGGGTTGTAAAGCTCTTTTACCCGGGATGATAATGACAGTACCGGGAGAATAAGCTCCGGCTAACTCCGTGCCAGCAGCCGCGGTAATACGGAGGGA…	PZ395099	96.8	745	Sphingobium yanoikuyae	k__Bacteria	p__Proteobacteria	c__Alphaproteobacteria	o__Sphingomonadales	f__Sphingomonadaceae	g__Sphingobium	s__yanoikuyae	Not tested	Not tested	Not tested	Not tested	0	0	0	0
RM118	3°49'07.6"N 77°01'58.5"W; Campo hermoso mangrove, Buenaventura, Valle del Cauca, Colombia	Rhizophora mangle	Rhizosphere	TSA	GCGGCGGACGGGTGAGTAACACGTGGGCAACCTGCCTGTAAGACTGGGATAACTTCGGGAAACCGGAGCTAATACCGGATAATCCTTTTCCTCTCATGAGGAAAAGCTGAAAGACGGTTTACGCTGTCACTTACAGATGGGCCCGCGGCGCATTAGCTAGTTGGTGAGGTAACGGCTCACCAAGGCGACGATGCGTAGCCGACCTGAGAGGGTGATCGGCCACACTGGGACTGAGACACGGCCCAGACTCCTACGGGAGGCAGCAGTAGGGAATCTTCCGCAATGGACGAAAGTCTGACGGAGCAACGCCGCGTGAGTGATGAAGGTTTTCGGATCGTAAAACTCTGTTGTTAGGGAAGAACAAGTACAAGAGTAACTGCTTGTACCTTGACGGTACCT…	PZ395100	97.8	1200	Bacillus circulans	k__Bacteria	p__Firmicutes	c__Bacilli	o__Bacillales	f__Bacillaceae	g__Bacillus	s__circulans	Not tested	Not tested	Not tested	Not tested	0	0	0	0
RM120	3°49'07.6"N 77°01'58.5"W; Campo hermoso mangrove, Buenaventura, Valle del Cauca, Colombia	Rhizophora mangle	Rhizosphere	TSA	ATCCGCGATTACTAGCGATTCCGGCTTCATGCAGGCGAGTTGCAGCCTGCAATCCGAACTGAGAATGGTTTTAAGGGATTCGCTCCACCTCGCGGTCTCGCTGCCCTCTGTACCATCCATTGTAGCACGTGTGTAGCCCAGGTCATAAGGGGCATGATGATTTGACGTCATCCCCACCTTCCTCCGGTTTGTCACCGGCAGTCACCTTAGAGTGCCCAACTGAATGCTGGCAACTAAGATCAAGGGTTGCGCTCGTTGCGGGACTTAACCCAACATCTCACGACACGAGCTGACGACAACCATGCACCACCTGTCACCGCTGTCCCCGAAGGGAAAGATCTGTCTCCAGACCGGTCAGCGGGATGTCAAGACCTGGTAAGGTTCTTCGCGTTGCTTCGA…	PZ395101	99.1	533	Bacillus fordii	k__Bacteria	p__Firmicutes	c__Bacilli	o__Bacillales	f__Bacillaceae	g__Bacillus	s__fordii	Not tested	Not tested	Not tested	Not tested	0	0	0	0
RM121	3°49'07.6"N 77°01'58.5"W; Campo hermoso mangrove, Buenaventura, Valle del Cauca, Colombia	Rhizophora mangle	Stem	TSA	ACTCCGACTTCACGGGGTCGAGTTGCAGACCCCGATCCGAACTGAGACCGGCTTTAAGGGATTCGCTCCACCTCACGGCTTGGCAGCCCTCTGTACCGGCCATTGTAGCATGTGTGAAGCCCTGGACATAAGGGGCATGATGACTTGACGTCGTCCCCACCTTCCTCCGAGTTGACCCCGGCAGTCTCCTGCGAGTCCCCACCATTACGTGCTGGCAACACAGGACAAGGGTTGCGCTCGTTGCGGGACTTAACCCAACATCTCACGACACGAGCTGACGACAGCCATGCACCACCTGTACACCGACCTTGCGGAAACCACATCTCTGCAGCTGTCCGGTGCATGTCAAACCCAGGTAAGGTTCTTCGCGTTGCATCGAATTAATCCACATGCTCCGCC…	PZ395102	97.9	1014	Rhodococcus aerolatus	k__Bacteria	p__Actinobacteriota	c__Actinobacteria	o__Corynebacteriales	f__Nocardiaceae	g__Rhodococcus	s__aerolatus	Not tested	Not tested	Not tested	Not tested	0	0	0	0
RM122	3°49'07.6"N 77°01'58.5"W; Campo hermoso mangrove, Buenaventura, Valle del Cauca, Colombia	Rhizophora mangle	Rhizosphere	TSA	TATCAGCGGCGGACGGGTGAGTAACACGTGGGTAACCTGCCTGTAAGACTGGGATAACTCCGGGAAACCGGGGCTAATACCGGATAACTCATTTCCTCGCATGAGGAAATGTTGAAAGGTGGCTTCTGCTACCACTTACAGATGGACCCGCGGCGCATTAACTAGTTGGGGAAGTAACGGCCCACCAAGGGAACCATGCCTAACCCAACTGAGAGGGTGATCGGCCACACTGGGACTGAAACCCCGCCCAAACTCCTACGGGAGGCAGCAGTAAGGAATCTTCCGCAATGGAAGAAAGTCTGACCGAACAACCCCGCGTGAATGATGAAGGTTTTCCGATCCTAAAGCTCTGTTGGTAAGGAAAAACAAGTGCCGTTCAAATAGGGCGGCACCTTGACC…	PZ395103	94.6	635	Rossellomorea vietnamensis	k__Bacteria	p__Firmicutes	c__Bacilli	o__Bacillales	f__Bacillaceae	g__Rossellomorea	s__vietnamensis	Not tested	Not tested	Not tested	Not tested	0	0	0	0
RM123	3°49'07.6"N 77°01'58.5"W; Campo hermoso mangrove, Buenaventura, Valle del Cauca, Colombia	Rhizophora mangle	Rhizosphere	TSA	CATTGTAGTACGTGTGTAGCCCAAGTCATAAGGGGCATGATGATTTGACGTCATCCCCGCCTTCCTCCGGTTTGTCACCGGCAGTCATTCTAGAGTGCCCAGCCTNACCTGCTGGCAACTAAAATCAAGGGTTGCGCTCGTTGCGGGACTTAACCCAACATCTCACGACACGAGCTGACGACAACCATGCACCACCTGTCACCTCTGTCCCGAAGGCCGCCTCTATCTCTAGAGGNTTCAGAGGGATGTCAAGACTTGGTAAGGTTCTTCGCGTTGCTTCGAATTAAACCACATACTCCACTGCTTGTGCGGGTCCCCGTCAATTCCTTTGAGTTTCAGTCTTGCGACCGTACTCCCCAGGCGGAATGCTTAATGTGTTAACTTCGGCACCAAGGGTAT…	PZ395104	100	439	Paenibacillus lautus	k__Bacteria	p__Firmicutes	c__Bacilli	o__Paenibacillales	f__Paenibacillaceae	g__Paenibacillus	s__lautus	Not tested	Not tested	Not tested	Not tested	0	0	0	0
RM124	3°49'07.6"N 77°01'58.5"W; Campo hermoso mangrove, Buenaventura, Valle del Cauca, Colombia	Rhizophora mangle	Rhizosphere	TSA	CCGAACTGAGACCGGCTTTTTGGGATTCGCTCCACCTTACGGTATCGCAGCCCTTTGTACCGGCCATTGTAGCATGCGTGAAGCCCAAGACATAAGGGGCATGATGATTTG		92.8	111	Clavibacter michiganensis	k__Bacteria	p__Actinobacteriota	c__Actinobacteria	o__Micrococcales	f__Microbacteriaceae	g__Clavibacter	s__michiganensis	Not tested	Not tested	Not tested	Not tested	0	0	0	0
RM127	3°49'07.6"N 77°01'58.5"W; Campo hermoso mangrove, Buenaventura, Valle del Cauca, Colombia	Rhizophora mangle	Rhizosphere	TSA	GCTTTTTGGATTAGCATCAATCGCTGTGTAGCAACCCTCTGTACCTACCATTGTAGCACGTGTGTAGCCCTGGTCGTAAGGGCCATGATGACTTGACGTCGTCCCCGCCTTCCTCCAGTTTGTCACTGGCAGTATCCTTAAAGTTCCCGGCTTAACCCGCTGGCAAATAAGGAAAAGGGTTGCGCTCGTTGCGGGACTTAACCCAACATCTCACGACACGAGCTGACGACAGCCATGCAGC	PZ395105	100	241	Faucicola osloensis	k__Bacteria	p__Proteobacteria	c__Gammaproteobacteria	o__Pseudomonadales	f__Moraxellaceae	g__Faucicola	s__osloensis	Not tested	Not tested	Not tested	Not tested	0	0	0	0
RM130	3°49'07.6"N 77°01'58.5"W; Campo hermoso mangrove, Buenaventura, Valle del Cauca, Colombia	Rhizophora mangle	Rhizosphere	TSA	CACGGGGTCGAGTTGCAGACCCCGATCCGAACTGAGACCGGCTTTAAGGGATTCGCTCCACCTCACGGTATCGCAGCCCTCTGTACCGACCATTGTAGCATGTGTGAAGCCCTGGACATAAGGG		100	124	Rhodococcus biphenylivorans	k__Bacteria	p__Actinobacteriota	c__Actinobacteria	o__Corynebacteriales	f__Nocardiaceae	g__Rhodococcus	s__biphenylivorans	Not tested	Not tested	Not tested	Not tested	0	0	0	0
RM131	3°49'07.6"N 77°01'58.5"W; Campo hermoso mangrove, Buenaventura, Valle del Cauca, Colombia	Rhizophora mangle	Rhizosphere	TSA	TCCGCGATTACTAGCAATTCCGACTTCATGCAGGCGAGTTGCAGCCTGCAATCCGAACTGAGACCGGCTTTTATAGGATTCGCTCCACCTCGCGGCTTCGCTTCCCGTTGTACCGGCCATTGTAGTACGTGTGTAGCCCAGCTCATAAGGGGCATGATGATTTGACGTCATCCCCACCTTCCTCCGGTTTGTCACCGGCAGTCACCTTAGAGTGCCCAGCCGAACTGCTGGCAACTAAGATCAAGGGTTGCGCTCGTTGCGGGACTTAACCCAACATCTCACGACACGAGCTGACGACAACCATGCACCACCTGTCTCCTCCGTCCCCGAAGGGCCGCCTCTATCTCTAGAGGATTCAGAGGGATGTCAAGAGCTGGTAAGGTTCTTCGCGTTGCTTCG…	PZ395106	90.5	443	Paenibacillus taihuensis	k__Bacteria	p__Firmicutes	c__Bacilli	o__Paenibacillales	f__Paenibacillaceae	g__Paenibacillus	s__taihuensis	Not tested	Not tested	Not tested	Not tested	0	0	0	0
RM132	3°49'07.6"N 77°01'58.5"W; Campo hermoso mangrove, Buenaventura, Valle del Cauca, Colombia	Rhizophora mangle	Root	TSA	CTTTTTGGGATTCGCTCCACCTTACGGTATCGCAGCCCATTGTACCGGCCATTGTAGCATGCGTGAAGCCCAAGACATAAGGGGCATGATGATTTGACGTCATCCCCACCTTCCTCCGAGTTGACCCCGGCAGTCTCCTATGAGTCCCCACCATCACGTGCTGGCAACATAGGACGAGGGTTGCGCTCGTTGCGGGACTTAACCCAACATCTCACGACACGAGCTGACGACAACCATGCACCACCTGTATACCCCGCCGAAGCACTCCCCATCTCTGGGGATAGAGGGTATATGTCAAGCCTTGGTAAGGTTCTTCGCGTTGCATCGAATTAATCCGCATGCTCCGCCGCTTGTGCGGGCCCCCGTCAATTCCTTTGAGTTTTAGCCTTGCGGCCGTAC…	PZ395107	100	531	Demequina maris	k__Bacteria	p__Actinobacteriota	c__Actinobacteria	o__Micrococcales	f__Demequinaceae	g__Demequina	s__maris	Not tested	Not tested	Not tested	Not tested	0	0	0	0
RM134	3°49'07.6"N 77°01'58.5"W; Campo hermoso mangrove, Buenaventura, Valle del Cauca, Colombia	Rhizophora mangle	Rhizosphere	TSA	TCAGCGGCGGACGGGTGAGTAACACGTGGGTAACCTGCCTGTAAGACTGGGATAACTCCGGGAAACCGGGGCTAATACCGGATAATTTAGTTCCTCGCATGAGGAACTGTTGAAAGGTGGCTTTTCGCTCCCACTTACAGATGGACCCGCGGCGCATTACCTAGTTGGGGAGGAAACGGCTCACCAAGGCAACGATGCGTACCCAACCTGAGAGGGGGATCGGCCCCCCTGGGACTGAAACACGGCCCAAACTCCTACGGGAGGCAGCAGTAGGAAATCTTCCGCAATGGACAAAAGTCTGACGGACCACCCCCGCGGGAGTGAAAAAGGTTTTCGAATCGAAAAACTCTGTTGTTAGGAAAAAACAAGTGCCGTTCAAATAGGGCGGCC	PZ395108	93	390	Bacillus aquimaris	k__Bacteria	p__Firmicutes	c__Bacilli	o__Bacillales	f__Bacillaceae	g__Bacillus	s__aquimaris	Not tested	Not tested	Not tested	Not tested	0	0	0	0
RM135	3°49'07.6"N 77°01'58.5"W; Campo hermoso mangrove, Buenaventura, Valle del Cauca, Colombia	Rhizophora mangle	Rhizosphere	TSA	GACGGGTGAGTAACACGTGGGTAACCTGCCTGTAAGACTGGGATAACTCCGGGAAACCGGGGCTAATACCGGATAACTCATTTCCTCGCATGAGGAAATGTTGAAAGGTGGCTTCTGCTACCACTTACCGATGGACCCCCGGCGCAATAACTAATTGGTGAAGTAACGGCTCCCCAAGGGAACCATGCCTAACCCAACTGAAAGGGTGATCGGCCACCCTGGGACTGAAACACGGCCCAAACTCCTACGGGAGGCAGCAATAAGGAATCTTCCGCAATGGACCAAAGTCTGACGGAACAACCCCCCGTGAGTGATGAAAGTTTTCCGATCCTAAAGCTCTGTTGTTAAGGAAAAACAAGTGCCGTTCCAATAAGGCGGCACCTTGACGGTACCTAACCA…	PZ395109	94.6	573	Rossellomorea vietnamensis	k__Bacteria	p__Firmicutes	c__Bacilli	o__Bacillales	f__Bacillaceae	g__Rossellomorea	s__vietnamensis	Not tested	Not tested	Not tested	Not tested	0	0	0	0
RM137	3°49'07.6"N 77°01'58.5"W; Campo hermoso mangrove, Buenaventura, Valle del Cauca, Colombia	Rhizophora mangle	Root	TSA	ATTCCGACTTCATGCAGGCGAGTTGCAGCCTGCAATCCGAACTGAGACCGGCTTTATAGGATTAGCTCCAGATCGCTCCTTCGCAGCCCGTTGTACCGGCCATTGTAGTACGTGTGTAGCCCAGGTCATAAGGGGCATGATGATTTGACGTCATCCCCGCCTTCCTCCGGTTTGTCACCGGCAGTCAATCTAGAGTGCCCACCATCACGTGCTGGCAACTAAATTCAAGGGTTGCGCTCGTTGCGGGACTTAACCCAACATCTCACGACACGAGCTGACGACAACCATGCACCACCTGTCTCCTCTGTCCCGAAGGCCTACGCTGTCTCCAACGTATTCAGAGGGAT	PZ395110	95.4	347	Cohnella damuensis	k__Bacteria	p__Firmicutes	c__Bacilli	o__Paenibacillales	f__Paenibacillaceae	g__Cohnella	s__damuensis	Not tested	Not tested	Not tested	Not tested	0	0	0	0
RM138	3°49'07.6"N 77°01'58.5"W; Campo hermoso mangrove, Buenaventura, Valle del Cauca, Colombia	Rhizophora mangle	Root	TSA	GATCTGCGATTACTAGCGACTCCGACTTCACGGGGTCGAGTTGCAGACCCCGATCCGAACTGAGACCGGCTTTTTGGGATTCGCTCCACCTCACGGTATCGCAGCCCATTGTACCGGCCATTGTAGCATGCGTGAAGCCCTGGACATAAGGGGCATGATGACTTGACGTCATCCCCACCTTCCTCCGAGTTGACCCCGGCAGTCTTCGATGAGTCCCCGCCATAACGCGCTGGCAACATCGAACGAGGGTTGCGCTCGTTGCGGGACTTAACCCAACATCTCACGACACGAGCTGACGACAGCCATGCACCACCTGTGACCGCCCCCGAAGGACCTTACATCTCTGCAAGTTTTGCGGCCATGTCAAACCCAGGTAAGGTTCTTCGCGTTGCATCGAAT…	PZ395111	97.2	471	Micromonospora lacustris	k__Bacteria	p__Actinobacteriota	c__Actinobacteria	o__Micromonosporales	f__Micromonosporaceae	g__Micromonospora	s__lacustris	Not tested	Not tested	Not tested	Not tested	0	0	0	0
RM139	3°49'07.6"N 77°01'58.5"W; Campo hermoso mangrove, Buenaventura, Valle del Cauca, Colombia	Rhizophora mangle	Rhizosphere	TSA													Not tested	Not tested	Not tested	Not tested	0	0	0	0
RM141	3°49'07.6"N 77°01'58.5"W; Campo hermoso mangrove, Buenaventura, Valle del Cauca, Colombia	Rhizophora mangle	Rhizosphere	TSA	AGCAATTCCGACTTCATGCAGGCGAGTTGCAGCCTGCAATCCGAACTGAGACCGGCTTTTCTAGGATTCGCTCCAGATCGCTCCTTCGCTTCCCGTTGTACCGGCCATTGTAGTACGTGTGTAGCCCAGGTCATAAGGGGCATGATGATTTGACGTCATCCCCACCTTCCTCCGGTTTGTCACCGGCAGTCACTCTAGAGTGCCCAACTTCAC	PZ395112	92.6	213	Paenibacillus macerans	k__Bacteria	p__Firmicutes	c__Bacilli	o__Paenibacillales	f__Paenibacillaceae	g__Paenibacillus	s__macerans	Not tested	Not tested	Not tested	Not tested	0	0	0	0
RM142	3°49'07.6"N 77°01'58.5"W; Campo hermoso mangrove, Buenaventura, Valle del Cauca, Colombia	Rhizophora mangle	Root	TSA	TTCCGCCTTCATGCTCTCGAGTTGCAGAGAACAATCCGAACTGAGACGGCTTTTGGAGATTAGCTCACACTCGCGTGCTCGCTGCCCACTGTCACCGCCATTGTAGCACGTGTGTAGCCCAGCGTGTAAGGGCCATGAGGACTTGACGTCATCCCCACCTTCCTCCGGCTTATCACCGGCAGTTTCCTTAGAGTGCCCAACTAAATGATGGCAACTAAGGACGAGGGTTGCG	PZ395113	97.4	232	Novosphingobium naphthalenivorans	k__Bacteria	p__Proteobacteria	c__Alphaproteobacteria	o__Sphingomonadales	f__Sphingomonadaceae	g__Novosphingobium	s__naphthalenivorans	Not tested	Not tested	Not tested	Not tested	0	0	0	0
RM143	3°49'07.6"N 77°01'58.5"W; Campo hermoso mangrove, Buenaventura, Valle del Cauca, Colombia	Rhizophora mangle	Rhizosphere	TSA													Not tested	Not tested	Not tested	Not tested	0	0	0	0
RM144	3°49'07.6"N 77°01'58.5"W; Campo hermoso mangrove, Buenaventura, Valle del Cauca, Colombia	Rhizophora mangle	Root	TSA	GGCTCACCAAGGCGACGATGCGTAGCCGACCTGAGAGGGTGATCGGCCACACTGGGACTGAGACACGGCCCAGACTCCTACGGGAGGCAGCAGTAGGGAATCTTCCGCAATGGACGAAAGTCTGACGGAGCAACGCCGCGTGAGCGATGAAGGCCTTCGGGTCGTAAAGCTCTGTTGTTAGGGAAGAACAAGTGCTAGTTAAATAAGCTGGCACCTTGACGGTACCTAACCAGAAAGCCACGGCTAACTACGTGCCAGCAGCCGCGGTAATACGTAGGTGGCAAGCGTTGTCCGGAATTATTGGGCGTAAAGC	PZ395114	99.7	313	Gottfriedia endophytica	k__Bacteria	p__Firmicutes	c__Bacilli	o__Bacillales	f__Bacillaceae	g__Gottfriedia	s__endophytica	Not tested	Not tested	Not tested	Not tested	0	0	0	0
RM145	3°49'07.6"N 77°01'58.5"W; Campo hermoso mangrove, Buenaventura, Valle del Cauca, Colombia	Rhizophora mangle	Root	TSA	GACCCCGATCCGAACTGAGACCGGCTTTGAAAGGATTCGCTCCACCTCACGGCATCGCAGCCCTTTGTACCGGCCATTGTAGCATGTGTGAAGCCCTGGACATAAGGGGCATGATGACTTGACGTCATCCCCACCTTCCTCCGAGTTGACCCCGGCAGTCTCTCACGAGTCCCCG	PZ395115	91.4	175	Mycobacterium vaccae	k__Bacteria	p__Actinobacteria	c__Actinobacteria	o__Actinomycetales	f__Mycobacteriaceae	g__Mycobacterium	s__vaccae	Not tested	Not tested	Not tested	Not tested	0	0	0	0
RM146	3°49'07.6"N 77°01'58.5"W; Campo hermoso mangrove, Buenaventura, Valle del Cauca, Colombia	Rhizophora mangle	Root	TSA	GTTAGCGGCGGACGGGTGAGTAACACGTGGGCAACCTACCTGTAAGACTGGGATAACTTCGGGAAACCGGAGCTAATACCGGATGACATAAAGGAACTCCTGTTCCTTTATTGAAAGATGGCTTCGGCTATCACTTACAGATGGGCCCGCGGCGCATTAGCTAGTTGGTGAGGTAACGGCTCACCAAGGCGACGATGCGTAGCCGACCTGAGAGGGTGATCGGCCACACTGGGACTGAGACACGGCCCAGACTCCTACGGGAGGCAGCAGTAGGGAATCTTCCGCAATGGACGAAAGTCTGACGGAGCAACGCCGCGTGAGCGATGAAGGCCTTCGGGTCGTAAAGCTCTGTTGTTAGGGAAGAATAAGTGCTAGTTGAATAAGCTGGCACCTTGACGG…	PZ395116	99.7	1188	Gottfriedia acidiceleris	k__Bacteria	p__Firmicutes	c__Bacilli	o__Bacillales	f__Bacillaceae	g__Gottfriedia	s__acidiceleris	Not tested	Not tested	Not tested	Not tested	0	0	0	0
RM147	3°49'07.6"N 77°01'58.5"W; Campo hermoso mangrove, Buenaventura, Valle del Cauca, Colombia	Rhizophora mangle	Root	TSA													Not tested	Not tested	Not tested	Not tested	0	0	0	0
RM148	3°49'07.6"N 77°01'58.5"W; Campo hermoso mangrove, Buenaventura, Valle del Cauca, Colombia	Rhizophora mangle	Root	TSA													Not tested	Not tested	Not tested	Not tested	0	0	0	0
